# Supplementary material for: Towards trustworthy digital health: reliability of uncertainty-aware convolutional neural networks
Source: PeerJ journal article supplement (doi:10.7717/peerj-cs.3414), 2026-01-28
Supplement: trustworthinessmain.zip [file CNNs_Vs_Melanoma_Benign.xlsx]

## Sheet: Benign_trust
	Network 1	Network 2	Class	Affidabilità	n1_TPR	n1_TNR	n1_FPR	n1_FNR	n2_TPR	n2_TNR	n2_FPR	n2_FNR
	Alexnet	Alexnet	Benign	0.954955
	Alexnet	Densenet	Benign	0.216151
	Alexnet	Efficientnetb0	Benign	0.145069
	Alexnet	Googlenet	Benign	0.213613
	Alexnet	inceptionresnetv2	Benign	0.214828
	Alexnet	inceptionv3	Benign	0.237174
	Alexnet	mobilenetv2	Benign	0.0888718
	Alexnet	resnet18	Benign	0.138629
	Alexnet	resnet50	Benign	0.13862
	Alexnet	shufflenet	Benign	0.185852
	Alexnet	vgg16	Benign	0.0691648
	Alexnet	vgg19	Benign	0.109546
	Alexnet	xception	Benign	0.188893
	Densenet	Alexnet	Benign	0.216151
	Densenet	Densenet	Benign	0.954955
	Densenet	Efficientnetb0	Benign	0.184927
	Densenet	Googlenet	Benign	0.0522722
	Densenet	inceptionresnetv2	Benign	0.366193
	Densenet	inceptionv3	Benign	0.267916
	Densenet	mobilenetv2	Benign	0.224436
	Densenet	resnet18	Benign	0.350302
	Densenet	resnet50	Benign	0.379847
	Densenet	shufflenet	Benign	0.258464
	Densenet	vgg16	Benign	0.190876
	Densenet	vgg19	Benign	0.107655
	Densenet	xception	Benign	0.435328
	Efficientnetb0	Alexnet	Benign	0.145069
	Efficientnetb0	Densenet	Benign	0.184927
	Efficientnetb0	Efficientnetb0	Benign	0.90991
	Efficientnetb0	Googlenet	Benign	-0.00513923
	Efficientnetb0	inceptionresnetv2	Benign	0.164775
	Efficientnetb0	inceptionv3	Benign	0.0912323
	Efficientnetb0	mobilenetv2	Benign	0.0875614
	Efficientnetb0	resnet18	Benign	0.0706005
	Efficientnetb0	resnet50	Benign	0.114978
	Efficientnetb0	shufflenet	Benign	0.273071
	Efficientnetb0	vgg16	Benign	0.291906
	Efficientnetb0	vgg19	Benign	0.45632
	Efficientnetb0	xception	Benign	0.116196
	GoogleNet	Alexnet	Benign	0.213613
	GoogleNet	densenet	Benign	0.0522722
	GoogleNet	Efficientnetb0	Benign	-0.00513923
	GoogleNet	Googlenet	Benign	0.855856
	GoogleNet	Inceptionresnetv2	Benign	-0.0141232
	GoogleNet	inceptionv3	Benign	0.267976
	GoogleNet	Mobilenetv2	Benign	-0.0422793
	GoogleNet	resnet18	Benign	-0.0203241
	GoogleNet	resnet50	Benign	-0.0278604
	GoogleNet	Shufflenet	Benign	0.0522372
	GoogleNet	vgg16	Benign	-0.0567536
	GoogleNet	vgg19	Benign	0.0407862
	GoogleNet	xception	Benign	-0.011578
	Inceptionresnetv2	Alexnet	Benign	0.214828
	Inceptionresnetv2	Densenet	Benign	0.366193
	Inceptionresnetv2	Efficientnetb0	Benign	0.164775
	Inceptionresnetv2	Googlenet	Benign	-0.0141232
	Inceptionresnetv2	inceptionresnetv2	Benign	0.918919
	Inceptionresnetv2	inceptionv3	Benign	0.197763
	Inceptionresnetv2	mobilenetv2	Benign	0.236609
	Inceptionresnetv2	resnet18	Benign	0.316148
	Inceptionresnetv2	resnet50	Benign	0.360277
	Inceptionresnetv2	shufflenet	Benign	0.260492
	Inceptionresnetv2	vgg16	Benign	0.183896
	Inceptionresnetv2	vgg19	Benign	0.10365
	Inceptionresnetv2	xception	Benign	0.430971
	inceptionv3	Alexnet	Benign	0.237174
	inceptionv3	Densenet	Benign	0.267916
	inceptionv3	Efficientnetb0	Benign	0.0912323
	inceptionv3	Googlenet	Benign	0.267976
	inceptionv3	inceptionresnetv2	Benign	0.197763
	inceptionv3	inceptionv3	Benign	0.936937
	inceptionv3	mobilenetv2	Benign	0.118555
	inceptionv3	resnet18	Benign	0.135737
	inceptionv3	resnet50	Benign	0.154445
	inceptionv3	shufflenet	Benign	0.224718
	inceptionv3	vgg16	Benign	0.0660148
	inceptionv3	vgg19	Benign	0.0731122
	inceptionv3	xception	Benign	0.201208
	mobilenetv2	Alexnet	Benign	0.0888718
	mobilenetv2	Densenet	Benign	0.224436
	mobilenetv2	Efficientnetb0	Benign	0.0875614
	mobilenetv2	Googlenet	Benign	-0.0422793
	mobilenetv2	inceptionresnetv2	Benign	0.236609
	mobilenetv2	inceptionv3	Benign	0.118555
	mobilenetv2	mobilenetv2	Benign	0.882883
	mobilenetv2	resnet18	Benign	0.249022
	mobilenetv2	resnet50	Benign	0.257314
	mobilenetv2	shufflenet	Benign	0.174337
	mobilenetv2	vgg16	Benign	0.152264
	mobilenetv2	vgg19	Benign	0.032842
	mobilenetv2	xception	Benign	0.272133
	resnet18	Alexnet	Benign	0.138629
	resnet18	Densenet	Benign	0.350302
	resnet18	Efficientnetb0	Benign	0.0706005
	resnet18	Googlenet	Benign	-0.0203241
	resnet18	inceptionresnetv2	Benign	0.316148
	resnet18	inceptionv3	Benign	0.135737
	resnet18	mobilenetv2	Benign	0.249022
	resnet18	resnet18	Benign	0.918919
	resnet18	resnet50	Benign	0.528935
	resnet18	shufflenet	Benign	0.161931
	resnet18	vgg16	Benign	0.141439
	resnet18	vgg19	Benign	0.0223621
	resnet18	xception	Benign	0.467397
	resnet50	Alexnet	Benign	0.13862
	resnet50	Densenet	Benign	0.379847
	resnet50	Efficientnetb0	Benign	0.114978
	resnet50	Googlenet	Benign	-0.0278604
	resnet50	inceptionresnetv2	Benign	0.360277
	resnet50	inceptionv3	Benign	0.154445
	resnet50	mobilenetv2	Benign	0.257314
	resnet50	resnet18	Benign	0.528935
	resnet50	resnet50	Benign	0.954955
	resnet50	shufflenet	Benign	0.217606
	resnet50	vgg16	Benign	0.164179
	resnet50	vgg19	Benign	0.0311773
	resnet50	exception	Benign	0.471945
	Shufflenet	Alexnet	Benign	0.185852
	Shufflenet	Densenet	Benign	0.258464
	Shufflenet	efficientnetb0	Benign	0.273071
	Shufflenet	googlenet	Benign	0.0522372
	Shufflenet	inceptionresnetv2	Benign	0.260492
	Shufflenet	inceptionv3	Benign	0.224718
	Shufflenet	mobilenetv2	Benign	0.174337
	Shufflenet	resnet18	Benign	0.161931
	Shufflenet	resnet50	Benign	0.217606
	Shufflenet	shufflenet	Benign	0.927928
	Shufflenet	vgg16	Benign	0.185728
	Shufflenet	vgg19	Benign	0.193816
	Shufflenet	xception	Benign	0.217267
	vgg16	Alexnet	Benign	0.0691648
	vgg16	Densenet	Benign	0.190876
	vgg16	efficientnetb0	Benign	0.291906
	vgg16	googlenet	Benign	-0.0567536
	vgg16	inceptionresnetv2	Benign	0.183896
	vgg16	inceptionv3	Benign	0.0660148
	vgg16	mobilenetv2	Benign	0.152264
	vgg16	resnet18	Benign	0.141439
	vgg16	resnet50	Benign	0.164179
	vgg16	shufflenet	Benign	0.185728
	vgg16	vgg16	Benign	0.864865
	vgg16	vgg19	Benign	0.290497
	vgg16	xception	Benign	0.178702
	vgg19	Alexnet	Benign	0.109546
	vgg19	Densenet	Benign	0.107655
	vgg19	efficientnetb0	Benign	0.45632
	vgg19	googlenet	Benign	0.0407862
	vgg19	inceptionresnetv2	Benign	0.10365
	vgg19	inceptionv3	Benign	0.0731122
	vgg19	mobilenetv2	Benign	0.032842
	vgg19	resnet18	Benign	0.0223621
	vgg19	resnet50	Benign	0.0311773
	vgg19	shufflenet	Benign	0.193816
	vgg19	vgg16	Benign	0.290497
	vgg19	vgg19	Benign	0.837838
	vgg19	xception	Benign	0.0574191
	xception	Alexnet	Benign	0.188893
	xception	Densenet	Benign	0.435328
	xception	efficientnetb0	Benign	0.116196
	xception	googlenet	Benign	-0.011578
	xception	inceptionresnetv2	Benign	0.430971
	xception	inceptionv3	Benign	0.201208
	xception	mobilenetv2	Benign	0.272133
	xception	resnet18	Benign	0.467397
	xception	resnet50	Benign	0.471945
	xception	shufflenet	Benign	0.217267
	xception	vgg16	Benign	0.178702
	xception	vgg19	Benign	0.0574191
	xception	xception	Benign	0.945946
		Trustability CNN verso Benign	0.237616

## Sheet: Beni_1_alexnet_alexnet
		Activation Maps Consensus		Network 1	Network 2
Immagine	Immagine	Gradcam-Consensus	True_Label	Alexnet_Scratch	Densenet_Scratch	Predict_Consensus	Penalty	Trustability
ISIC_3134070		1	Benign	Benign	Benign	1	0	1
ISIC_3134415		1	Benign	Benign	Benign	1	0	1
ISIC_3134683		1	Benign	Benign	Benign	1	0	1
ISIC_3136228		1	Benign	Benign	Benign	1	0	1
ISIC_3136263		1	Benign	Benign	Benign	1	0	1
ISIC_3140098		1	Benign	Benign	Benign	1	0	1
ISIC_3142775		1	Benign	Benign	Benign	1	0	1
ISIC_3144003		1	Benign	Benign	Benign	1	0	1
ISIC_3144326		1	Benign	Benign	Benign	1	0	1
ISIC_3147179		1	Benign	Benign	Benign	1	0	1
ISIC_3148361		1	Benign	Benign	Benign	1	0	1
ISIC_3149717		1	Benign	Benign	Benign	1	0	1
ISIC_3151260		1	Benign	Benign	Benign	1	0	1
ISIC_3154716		1	Benign	Benign	Benign	1	0	1
ISIC_3157921		1	Benign	Benign	Benign	1	0	1
ISIC_3160291		1	Benign	Benign	Benign	1	0	1
ISIC_3161477		1	Benign	Benign	Benign	1	0	1
ISIC_3165425		1	Benign	Benign	Benign	1	0	1
ISIC_3167799		1	Benign	Benign	Benign	1	0	1
ISIC_3171941		1	Benign	Benign	Benign	1	0	1
ISIC_3180138		1	Benign	Benign	Benign	1	0	1
ISIC_3183653		1	Benign	Malignant	Malignant	1	1	0
ISIC_3183946		1	Benign	Benign	Benign	1	0	1
ISIC_3185470		1	Benign	Benign	Benign	1	0	1
ISIC_3198078		1	Benign	Benign	Benign	1	0	1
ISIC_3201945		1	Benign	Benign	Benign	1	0	1
ISIC_3203303		1	Benign	Benign	Benign	1	0	1
ISIC_3204621		1	Benign	Benign	Benign	1	0	1
ISIC_3209641		1	Benign	Benign	Benign	1	0	1
ISIC_3210813		1	Benign	Benign	Benign	1	0	1
ISIC_3213469		1	Benign	Benign	Benign	1	0	1
ISIC_3213484		1	Benign	Benign	Benign	1	0	1
ISIC_3216562		1	Benign	Benign	Benign	1	0	1
ISIC_3219286		1	Benign	Benign	Benign	1	0	1
ISIC_3227705		1	Benign	Benign	Benign	1	0	1
ISIC_3227802		1	Benign	Benign	Benign	1	0	1
ISIC_3229879		1	Benign	Benign	Benign	1	0	1
ISIC_3230164		1	Benign	Benign	Benign	1	0	1
ISIC_3235491		1	Benign	Benign	Benign	1	0	1
ISIC_3238064		1	Benign	Benign	Benign	1	0	1
ISIC_3244329		1	Benign	Benign	Benign	1	0	1
ISIC_3249936		1	Benign	Benign	Benign	1	0	1
ISIC_3255457		1	Benign	Benign	Benign	1	0	1
ISIC_3264124		1	Benign	Benign	Benign	1	0	1
ISIC_3267036		1	Benign	Benign	Benign	1	0	1
ISIC_3267929		1	Benign	Benign	Benign	1	0	1
ISIC_3269241		1	Benign	Benign	Benign	1	0	1
ISIC_3269863		1	Benign	Benign	Benign	1	0	1
ISIC_3270209		1	Benign	Benign	Benign	1	0	1
ISIC_3274592		1	Benign	Benign	Benign	1	0	1
ISIC_3274903		1	Benign	Benign	Benign	1	0	1
ISIC_3278148		1	Benign	Benign	Benign	1	0	1
ISIC_3281252		1	Benign	Benign	Benign	1	0	1
ISIC_3291621		1	Benign	Benign	Benign	1	0	1
ISIC_3292151		1	Benign	Benign	Benign	1	0	1
ISIC_3296066		1	Benign	Benign	Benign	1	0	1
ISIC_3296136		1	Benign	Benign	Benign	1	0	1
ISIC_3299783		1	Benign	Benign	Benign	1	0	1
ISIC_3300386		1	Benign	Benign	Benign	1	0	1
ISIC_3303825		1	Benign	Benign	Benign	1	0	1
ISIC_3304345		1	Benign	Benign	Benign	1	0	1
ISIC_3307352		1	Benign	Benign	Benign	1	0	1
ISIC_3310625		1	Benign	Benign	Benign	1	0	1
ISIC_3314853		1	Benign	Benign	Benign	1	0	1
ISIC_3329099		1	Benign	Benign	Benign	1	0	1
ISIC_3331533		1	Benign	Benign	Benign	1	0	1
ISIC_3333135		1	Benign	Benign	Benign	1	0	1
ISIC_3337833		1	Benign	Benign	Benign	1	0	1
ISIC_3341811		1	Benign	Benign	Benign	1	0	1
ISIC_3349562		1	Benign	Benign	Benign	1	0	1
ISIC_3351401		1	Benign	Benign	Benign	1	0	1
ISIC_3354831		1	Benign	Benign	Benign	1	0	1
ISIC_3356216		1	Benign	Benign	Benign	1	0	1
ISIC_3357584		1	Benign	Benign	Benign	1	0	1
ISIC_3360764		1	Benign	Benign	Benign	1	0	1
ISIC_3365692		1	Benign	Benign	Benign	1	0	1
ISIC_3366103		1	Benign	Benign	Benign	1	0	1
ISIC_3367944		1	Benign	Benign	Benign	1	0	1
ISIC_3368385		1	Benign	Benign	Benign	1	0	1
ISIC_3370255		1	Benign	Benign	Benign	1	0	1
ISIC_3371249		1	Benign	Benign	Benign	1	0	1
ISIC_3371722		1	Benign	Malignant	Malignant	1	1	0
ISIC_3375921		1	Benign	Benign	Benign	1	0	1
ISIC_3380520		1	Benign	Benign	Benign	1	0	1
ISIC_3380547		1	Benign	Benign	Benign	1	0	1
ISIC_3382231		1	Benign	Benign	Benign	1	0	1
ISIC_3383481		1	Benign	Malignant	Malignant	1	1	0
ISIC_3385810		1	Benign	Benign	Benign	1	0	1
ISIC_3391254		1	Benign	Benign	Benign	1	0	1
ISIC_3392433		1	Benign	Benign	Benign	1	0	1
ISIC_3393651		1	Benign	Benign	Benign	1	0	1
ISIC_3394796		1	Benign	Benign	Benign	1	0	1
ISIC_3397174		1	Benign	Benign	Benign	1	0	1
ISIC_3397377		1	Benign	Benign	Benign	1	0	1
ISIC_3397583		1	Benign	Benign	Benign	1	0	1
ISIC_3400298		1	Benign	Benign	Benign	1	0	1
ISIC_3401240		1	Benign	Benign	Benign	1	0	1
ISIC_3401780		1	Benign	Benign	Benign	1	0	1
ISIC_3402347		1	Benign	Benign	Benign	1	0	1
ISIC_3413138		1	Benign	Benign	Benign	1	0	1
ISIC_3413657		1	Benign	Benign	Benign	1	0	1
ISIC_3417724		1	Benign	Benign	Benign	1	0	1
ISIC_3418068		1	Benign	Benign	Benign	1	0	1
ISIC_3418978		1	Benign	Malignant	Malignant	1	1	0
ISIC_3426714		1	Benign	Benign	Benign	1	0	1
ISIC_3427736		1	Benign	Benign	Benign	1	0	1
ISIC_3427958		1	Benign	Benign	Benign	1	0	1
ISIC_3430311		1	Benign	Malignant	Malignant	1	1	0
ISIC_3440178		1	Benign	Benign	Benign	1	0	1
ISIC_3441543		1	Benign	Benign	Benign	1	0	1
ISIC_3445393		1	Benign	Benign	Benign	1	0	1
						111	5	106

## Sheet: Beni_1_alexnet_densenet
		Activation Maps Consensus		Network 1	Network 2
Immagine	Immagine	Gradcam-Consensus	True_Label	Alexnet_Scratch	Densenet_Scratch	Predict_Consensus	Penalty	Trustability
ISIC_3134070		0	Benign	Benign	Benign	1	0	0
ISIC_3134415		0.411962	Benign	Benign	Benign	1	0	0.411962
ISIC_3134683		0.134994	Benign	Benign	Benign	1	0	0.134994
ISIC_3136228		0.53481	Benign	Benign	Benign	1	0	0.53481
ISIC_3136263		0	Benign	Benign	Benign	1	0	0
ISIC_3140098		0.425221	Benign	Benign	Benign	1	0	0.425221
ISIC_3142775		0.30504	Benign	Benign	Benign	1	0	0.30504
ISIC_3144003		0.23985	Benign	Benign	Benign	1	0	0.23985
ISIC_3144326		0	Benign	Benign	Benign	1	0	0
ISIC_3147179		0.106466	Benign	Benign	Benign	1	0	0.106466
ISIC_3148361		0.11652	Benign	Benign	Benign	1	0	0.11652
ISIC_3149717		0.597094	Benign	Benign	Benign	1	0	0.597094
ISIC_3151260		0.172556	Benign	Benign	Benign	1	0	0.172556
ISIC_3154716		0.453585	Benign	Benign	Benign	1	0	0.453585
ISIC_3157921		0.12544	Benign	Benign	Benign	1	0	0.12544
ISIC_3160291		0.328671	Benign	Benign	Benign	1	0	0.328671
ISIC_3161477		0.197719	Benign	Benign	Benign	1	0	0.197719
ISIC_3165425		0.298968	Benign	Benign	Benign	1	0	0.298968
ISIC_3167799		0	Benign	Benign	Benign	1	0	0
ISIC_3171941		0.310696	Benign	Benign	Benign	1	0	0.310696
ISIC_3180138		0.151675	Benign	Benign	Benign	1	0	0.151675
ISIC_3183653		0.071633	Benign	Malignant	Benign	0	1	-0.928367
ISIC_3183946		0.504501	Benign	Benign	Benign	1	0	0.504501
ISIC_3185470		0.628009	Benign	Benign	Benign	1	0	0.628009
ISIC_3198078		0.05455	Benign	Benign	Benign	1	0	0.05455
ISIC_3201945		0.406098	Benign	Benign	Benign	1	0	0.406098
ISIC_3203303		0.533927	Benign	Benign	Benign	1	0	0.533927
ISIC_3204621		0.329684	Benign	Benign	Benign	1	0	0.329684
ISIC_3209641		0.413822	Benign	Benign	Benign	1	0	0.413822
ISIC_3210813		0.596541	Benign	Benign	Benign	1	0	0.596541
ISIC_3213469		0.48949	Benign	Benign	Benign	1	0	0.48949
ISIC_3213484		0.505394	Benign	Benign	Benign	1	0	0.505394
ISIC_3216562		0	Benign	Benign	Benign	1	0	0
ISIC_3219286		0.256111	Benign	Benign	Benign	1	0	0.256111
ISIC_3227705		0.434909	Benign	Benign	Benign	1	0	0.434909
ISIC_3227802		0.563681	Benign	Benign	Benign	1	0	0.563681
ISIC_3229879		0	Benign	Benign	Benign	1	0	0
ISIC_3230164		0.279518	Benign	Benign	Malignant	0	1	-0.720482
ISIC_3235491		0.518657	Benign	Benign	Benign	1	0	0.518657
ISIC_3238064		0.560013	Benign	Benign	Benign	1	0	0.560013
ISIC_3244329		0.475161	Benign	Benign	Benign	1	0	0.475161
ISIC_3249936		0.280077	Benign	Benign	Benign	1	0	0.280077
ISIC_3255457		0.253332	Benign	Benign	Benign	1	0	0.253332
ISIC_3264124		0.367482	Benign	Benign	Benign	1	0	0.367482
ISIC_3267036		0.437103	Benign	Benign	Benign	1	0	0.437103
ISIC_3267929		0.197314	Benign	Benign	Benign	1	0	0.197314
ISIC_3269241		0.292125	Benign	Benign	Benign	1	0	0.292125
ISIC_3269863		0.57741	Benign	Benign	Benign	1	0	0.57741
ISIC_3270209		0.233829	Benign	Benign	Benign	1	0	0.233829
ISIC_3274592		0.007143	Benign	Benign	Benign	1	0	0.007143
ISIC_3274903		0.003992	Benign	Benign	Benign	1	0	0.003992
ISIC_3278148		0.07656	Benign	Benign	Benign	1	0	0.07656
ISIC_3281252		0.649555	Benign	Benign	Benign	1	0	0.649555
ISIC_3291621		0.237225	Benign	Benign	Benign	1	0	0.237225
ISIC_3292151		0.101613	Benign	Benign	Benign	1	0	0.101613
ISIC_3296066		0	Benign	Benign	Malignant	0	1	-1
ISIC_3296136		0.68318	Benign	Benign	Benign	1	0	0.68318
ISIC_3299783		0	Benign	Benign	Benign	1	0	0
ISIC_3300386		0	Benign	Benign	Benign	1	0	0
ISIC_3303825		0.476805	Benign	Benign	Benign	1	0	0.476805
ISIC_3304345		0.545389	Benign	Benign	Benign	1	0	0.545389
ISIC_3307352		0.456908	Benign	Benign	Benign	1	0	0.456908
ISIC_3310625		0.452668	Benign	Benign	Benign	1	0	0.452668
ISIC_3314853		0.059862	Benign	Benign	Benign	1	0	0.059862
ISIC_3329099		0.588759	Benign	Benign	Benign	1	0	0.588759
ISIC_3331533		0.396264	Benign	Benign	Benign	1	0	0.396264
ISIC_3333135		0.071374	Benign	Benign	Benign	1	0	0.071374
ISIC_3337833		0.375004	Benign	Benign	Benign	1	0	0.375004
ISIC_3341811		0	Benign	Benign	Benign	1	0	0
ISIC_3349562		0	Benign	Benign	Benign	1	0	0
ISIC_3351401		0	Benign	Benign	Benign	1	0	0
ISIC_3354831		0.265151	Benign	Benign	Benign	1	0	0.265151
ISIC_3356216		0.233779	Benign	Benign	Benign	1	0	0.233779
ISIC_3357584		0.353991	Benign	Benign	Benign	1	0	0.353991
ISIC_3360764		0.220365	Benign	Benign	Benign	1	0	0.220365
ISIC_3365692		0.537353	Benign	Benign	Benign	1	0	0.537353
ISIC_3366103		0	Benign	Benign	Benign	1	0	0
ISIC_3367944		0.204029	Benign	Benign	Benign	1	0	0.204029
ISIC_3368385		0.510656	Benign	Benign	Benign	1	0	0.510656
ISIC_3370255		0.06088	Benign	Benign	Benign	1	0	0.06088
ISIC_3371249		0.666547	Benign	Benign	Benign	1	0	0.666547
ISIC_3371722		0.273021	Benign	Malignant	Malignant	1	1	-0.726979
ISIC_3375921		0.674903	Benign	Benign	Benign	1	0	0.674903
ISIC_3380520		0.151054	Benign	Benign	Benign	1	0	0.151054
ISIC_3380547		0.596866	Benign	Benign	Benign	1	0	0.596866
ISIC_3382231		0.724539	Benign	Benign	Benign	1	0	0.724539
ISIC_3383481		0.154052	Benign	Malignant	Benign	0	1	-0.845948
ISIC_3385810		0	Benign	Benign	Benign	1	0	0
ISIC_3391254		0.532278	Benign	Benign	Benign	1	0	0.532278
ISIC_3392433		0.183875	Benign	Benign	Benign	1	0	0.183875
ISIC_3393651		0.329103	Benign	Benign	Benign	1	0	0.329103
ISIC_3394796		0.753282	Benign	Benign	Benign	1	0	0.753282
ISIC_3397174		0	Benign	Benign	Benign	1	0	0
ISIC_3397377		0	Benign	Benign	Benign	1	0	0
ISIC_3397583		0.519297	Benign	Benign	Benign	1	0	0.519297
ISIC_3400298		0	Benign	Benign	Benign	1	0	0
ISIC_3401240		0.127273	Benign	Benign	Benign	1	0	0.127273
ISIC_3401780		0.032556	Benign	Benign	Benign	1	0	0.032556
ISIC_3402347		0.370326	Benign	Benign	Benign	1	0	0.370326
ISIC_3413138		0	Benign	Benign	Benign	1	0	0
ISIC_3413657		0.58597	Benign	Benign	Benign	1	0	0.58597
ISIC_3417724		0.195948	Benign	Benign	Benign	1	0	0.195948
ISIC_3418068		0.38096	Benign	Benign	Benign	1	0	0.38096
ISIC_3418978		0.411913	Benign	Malignant	Benign	0	1	-0.588087
ISIC_3426714		0.313151	Benign	Benign	Benign	1	0	0.313151
ISIC_3427736		0	Benign	Benign	Benign	1	0	0
ISIC_3427958		0.174525	Benign	Benign	Benign	1	0	0.174525
ISIC_3430311		0.384448	Benign	Malignant	Malignant	1	1	-0.615552
ISIC_3440178		0.248111	Benign	Benign	Benign	1	0	0.248111
ISIC_3441543		0.214698	Benign	Benign	Benign	1	0	0.214698
ISIC_3445393		0.253899	Benign	Benign	Malignant	0	1	-0.746101
						105	8	23.9927

## Sheet: Beni_1_alexnet_efficientnetb0
		Activation Maps Consensus		Network 1	Network 2
Immagine	Immagine	Gradcam-Consensus	True_Label	Alexnet_Scratch	Densenet_Scratch	Predict_Consensus	Penalty	Trustability
ISIC_3134070		0.27176	Benign	Benign	Benign	1	0	0.27176
ISIC_3134415		0	Benign	Benign	Benign	1	0	0
ISIC_3134683		0.195772	Benign	Benign	Benign	1	0	0.195772
ISIC_3136228		0.109599	Benign	Benign	Benign	1	0	0.109599
ISIC_3136263		0.220166	Benign	Benign	Benign	1	0	0.220166
ISIC_3140098		0.278092	Benign	Benign	Benign	1	0	0.278092
ISIC_3142775		0.040602	Benign	Benign	Malignant	0	1	-0.959398
ISIC_3144003		0.25851	Benign	Benign	Benign	1	0	0.25851
ISIC_3144326		0.451996	Benign	Benign	Benign	1	0	0.451996
ISIC_3147179		0.0872	Benign	Benign	Benign	1	0	0.0872
ISIC_3148361		0.36951	Benign	Benign	Benign	1	0	0.36951
ISIC_3149717		0.333762	Benign	Benign	Benign	1	0	0.333762
ISIC_3151260		0	Benign	Benign	Benign	1	0	0
ISIC_3154716		0	Benign	Benign	Benign	1	0	0
ISIC_3157921		0.547006	Benign	Benign	Benign	1	0	0.547006
ISIC_3160291		0	Benign	Benign	Benign	1	0	0
ISIC_3161477		0.052184	Benign	Benign	Benign	1	0	0.052184
ISIC_3165425		0	Benign	Benign	Benign	1	0	0
ISIC_3167799		0.229911	Benign	Benign	Benign	1	0	0.229911
ISIC_3171941		0.056311	Benign	Benign	Malignant	0	1	-0.943689
ISIC_3180138		0	Benign	Benign	Benign	1	0	0
ISIC_3183653		0.452852	Benign	Malignant	Malignant	1	1	-0.547148
ISIC_3183946		0.384046	Benign	Benign	Benign	1	0	0.384046
ISIC_3185470		0.034244	Benign	Benign	Benign	1	0	0.034244
ISIC_3198078		0.207256	Benign	Benign	Benign	1	0	0.207256
ISIC_3201945		0.207937	Benign	Benign	Benign	1	0	0.207937
ISIC_3203303		0.41583	Benign	Benign	Benign	1	0	0.41583
ISIC_3204621		0.247457	Benign	Benign	Benign	1	0	0.247457
ISIC_3209641		0.366908	Benign	Benign	Benign	1	0	0.366908
ISIC_3210813		0.25173	Benign	Benign	Benign	1	0	0.25173
ISIC_3213469		0.072177	Benign	Benign	Benign	1	0	0.072177
ISIC_3213484		0.110355	Benign	Benign	Benign	1	0	0.110355
ISIC_3216562		0.370978	Benign	Benign	Benign	1	0	0.370978
ISIC_3219286		0.18879	Benign	Benign	Benign	1	0	0.18879
ISIC_3227705		0.0776	Benign	Benign	Benign	1	0	0.0776
ISIC_3227802		0.191759	Benign	Benign	Benign	1	0	0.191759
ISIC_3229879		0.469945	Benign	Benign	Benign	1	0	0.469945
ISIC_3230164		0.271786	Benign	Benign	Malignant	0	1	-0.728214
ISIC_3235491		0.464811	Benign	Benign	Benign	1	0	0.464811
ISIC_3238064		0.374677	Benign	Benign	Benign	1	0	0.374677
ISIC_3244329		0.215903	Benign	Benign	Benign	1	0	0.215903
ISIC_3249936		0.15731	Benign	Benign	Malignant	0	1	-0.84269
ISIC_3255457		0.086886	Benign	Benign	Benign	1	0	0.086886
ISIC_3264124		0.258751	Benign	Benign	Benign	1	0	0.258751
ISIC_3267036		0	Benign	Benign	Benign	1	0	0
ISIC_3267929		0.0139	Benign	Benign	Benign	1	0	0.0139
ISIC_3269241		0	Benign	Benign	Benign	1	0	0
ISIC_3269863		0.187372	Benign	Benign	Benign	1	0	0.187372
ISIC_3270209		0.398552	Benign	Benign	Benign	1	0	0.398552
ISIC_3274592		0.193517	Benign	Benign	Benign	1	0	0.193517
ISIC_3274903		0.388322	Benign	Benign	Benign	1	0	0.388322
ISIC_3278148		0.27497	Benign	Benign	Benign	1	0	0.27497
ISIC_3281252		0.378933	Benign	Benign	Benign	1	0	0.378933
ISIC_3291621		0.345525	Benign	Benign	Benign	1	0	0.345525
ISIC_3292151		0.114087	Benign	Benign	Benign	1	0	0.114087
ISIC_3296066		0	Benign	Benign	Benign	1	0	0
ISIC_3296136		0.369031	Benign	Benign	Benign	1	0	0.369031
ISIC_3299783		0.199176	Benign	Benign	Benign	1	0	0.199176
ISIC_3300386		0.147309	Benign	Benign	Benign	1	0	0.147309
ISIC_3303825		0.505067	Benign	Benign	Benign	1	0	0.505067
ISIC_3304345		0.086173	Benign	Benign	Benign	1	0	0.086173
ISIC_3307352		0	Benign	Benign	Benign	1	0	0
ISIC_3310625		0.278175	Benign	Benign	Benign	1	0	0.278175
ISIC_3314853		0.025513	Benign	Benign	Benign	1	0	0.025513
ISIC_3329099		0	Benign	Benign	Benign	1	0	0
ISIC_3331533		0.206839	Benign	Benign	Benign	1	0	0.206839
ISIC_3333135		0.522046	Benign	Benign	Benign	1	0	0.522046
ISIC_3337833		0.305765	Benign	Benign	Benign	1	0	0.305765
ISIC_3341811		0.331907	Benign	Benign	Benign	1	0	0.331907
ISIC_3349562		0.126333	Benign	Benign	Benign	1	0	0.126333
ISIC_3351401		0.181418	Benign	Benign	Benign	1	0	0.181418
ISIC_3354831		0.459894	Benign	Benign	Benign	1	0	0.459894
ISIC_3356216		0.205172	Benign	Benign	Benign	1	0	0.205172
ISIC_3357584		0	Benign	Benign	Benign	1	0	0
ISIC_3360764		0.151817	Benign	Benign	Benign	1	0	0.151817
ISIC_3365692		0.280554	Benign	Benign	Benign	1	0	0.280554
ISIC_3366103		0.220681	Benign	Benign	Benign	1	0	0.220681
ISIC_3367944		0.177583	Benign	Benign	Benign	1	0	0.177583
ISIC_3368385		0	Benign	Benign	Benign	1	0	0
ISIC_3370255		0.533483	Benign	Benign	Benign	1	0	0.533483
ISIC_3371249		0.109327	Benign	Benign	Benign	1	0	0.109327
ISIC_3371722		0.221685	Benign	Malignant	Benign	0	1	-0.778315
ISIC_3375921		0.564249	Benign	Benign	Benign	1	0	0.564249
ISIC_3380520		0.641255	Benign	Benign	Malignant	0	1	-0.358745
ISIC_3380547		0.443061	Benign	Benign	Benign	1	0	0.443061
ISIC_3382231		0.659561	Benign	Benign	Benign	1	0	0.659561
ISIC_3383481		0.481534	Benign	Malignant	Malignant	1	1	-0.518466
ISIC_3385810		0.446359	Benign	Benign	Benign	1	0	0.446359
ISIC_3391254		0.216988	Benign	Benign	Benign	1	0	0.216988
ISIC_3392433		0.184261	Benign	Benign	Benign	1	0	0.184261
ISIC_3393651		0.331414	Benign	Benign	Benign	1	0	0.331414
ISIC_3394796		0.714799	Benign	Benign	Benign	1	0	0.714799
ISIC_3397174		0.425255	Benign	Benign	Benign	1	0	0.425255
ISIC_3397377		0.005966	Benign	Benign	Benign	1	0	0.005966
ISIC_3397583		0.087361	Benign	Benign	Benign	1	0	0.087361
ISIC_3400298		0.42305	Benign	Benign	Benign	1	0	0.42305
ISIC_3401240		0.081647	Benign	Benign	Benign	1	0	0.081647
ISIC_3401780		0.428665	Benign	Benign	Benign	1	0	0.428665
ISIC_3402347		0.115669	Benign	Benign	Benign	1	0	0.115669
ISIC_3413138		0	Benign	Benign	Benign	1	0	0
ISIC_3413657		0.296728	Benign	Benign	Benign	1	0	0.296728
ISIC_3417724		0.430134	Benign	Benign	Benign	1	0	0.430134
ISIC_3418068		0.050076	Benign	Benign	Benign	1	0	0.050076
ISIC_3418978		0.521403	Benign	Malignant	Malignant	1	1	-0.478597
ISIC_3426714		0.60929	Benign	Benign	Benign	1	0	0.60929
ISIC_3427736		0.331502	Benign	Benign	Benign	1	0	0.331502
ISIC_3427958		0.197291	Benign	Benign	Benign	1	0	0.197291
ISIC_3430311		0.381228	Benign	Malignant	Malignant	1	1	-0.618772
ISIC_3440178		0.240742	Benign	Benign	Benign	1	0	0.240742
ISIC_3441543		0.189824	Benign	Benign	Benign	1	0	0.189824
ISIC_3445393		0.280806	Benign	Benign	Malignant	0	1	-0.719194
						104	11	16.1026

## Sheet: Beni_1_alexnet_googlenet
		Activation Maps Consensus		Network 1	Network 2
Immagine	Immagine	Gradcam-Consensus	True_Label	Alexnet_Scratch	Densenet_Scratch	Predict_Consensus	Penalty	Trustability
ISIC_3134070		0.435159	Benign	Benign	Benign	1	0	0.435159
ISIC_3134415		0.463665	Benign	Benign	Benign	1	0	0.463665
ISIC_3134683		0.396756	Benign	Benign	Benign	1	0	0.396756
ISIC_3136228		0.408222	Benign	Benign	Benign	1	0	0.408222
ISIC_3136263		0.276283	Benign	Benign	Benign	1	0	0.276283
ISIC_3140098		0.551373	Benign	Benign	Benign	1	0	0.551373
ISIC_3142775		0.15138	Benign	Benign	Benign	1	0	0.15138
ISIC_3144003		0.449801	Benign	Benign	Benign	1	0	0.449801
ISIC_3144326		0.138815	Benign	Benign	Benign	1	0	0.138815
ISIC_3147179		0.654836	Benign	Benign	Benign	1	0	0.654836
ISIC_3148361		0.356421	Benign	Benign	Benign	1	0	0.356421
ISIC_3149717		0.528061	Benign	Benign	Benign	1	0	0.528061
ISIC_3151260		0.447646	Benign	Benign	Benign	1	0	0.447646
ISIC_3154716		0.064473	Benign	Benign	Benign	1	0	0.064473
ISIC_3157921		0.461822	Benign	Benign	Benign	1	0	0.461822
ISIC_3160291		0.178687	Benign	Benign	Benign	1	0	0.178687
ISIC_3161477		0.260093	Benign	Benign	Benign	1	0	0.260093
ISIC_3165425		0.217668	Benign	Benign	Benign	1	0	0.217668
ISIC_3167799		0.555685	Benign	Benign	Benign	1	0	0.555685
ISIC_3171941		0.02796	Benign	Benign	Benign	1	0	0.02796
ISIC_3180138		0.278994	Benign	Benign	Benign	1	0	0.278994
ISIC_3183653		0.302457	Benign	Malignant	Malignant	1	1	-0.697543
ISIC_3183946		0.563231	Benign	Benign	Benign	1	0	0.563231
ISIC_3185470		0.181101	Benign	Benign	Benign	1	0	0.181101
ISIC_3198078		0.315208	Benign	Benign	Benign	1	0	0.315208
ISIC_3201945		0.405257	Benign	Benign	Benign	1	0	0.405257
ISIC_3203303		0.453585	Benign	Benign	Benign	1	0	0.453585
ISIC_3204621		0.211719	Benign	Benign	Benign	1	0	0.211719
ISIC_3209641		0.3387	Benign	Benign	Benign	1	0	0.3387
ISIC_3210813		0.007692	Benign	Benign	Malignant	0	1	-0.992308
ISIC_3213469		0.431303	Benign	Benign	Benign	1	0	0.431303
ISIC_3213484		0	Benign	Benign	Malignant	0	1	-1
ISIC_3216562		0.447565	Benign	Benign	Benign	1	0	0.447565
ISIC_3219286		0.360959	Benign	Benign	Benign	1	0	0.360959
ISIC_3227705		0.060627	Benign	Benign	Benign	1	0	0.060627
ISIC_3227802		0.435871	Benign	Benign	Benign	1	0	0.435871
ISIC_3229879		0.494768	Benign	Benign	Benign	1	0	0.494768
ISIC_3230164		0.135516	Benign	Benign	Malignant	0	1	-0.864484
ISIC_3235491		0.420049	Benign	Benign	Benign	1	0	0.420049
ISIC_3238064		0.23706	Benign	Benign	Benign	1	0	0.23706
ISIC_3244329		0.53995	Benign	Benign	Benign	1	0	0.53995
ISIC_3249936		0.514934	Benign	Benign	Benign	1	0	0.514934
ISIC_3255457		0.380712	Benign	Benign	Benign	1	0	0.380712
ISIC_3264124		0.336612	Benign	Benign	Benign	1	0	0.336612
ISIC_3267036		0.52064	Benign	Benign	Benign	1	0	0.52064
ISIC_3267929		0.333573	Benign	Benign	Benign	1	0	0.333573
ISIC_3269241		0.370431	Benign	Benign	Benign	1	0	0.370431
ISIC_3269863		0.433983	Benign	Benign	Benign	1	0	0.433983
ISIC_3270209		0.465687	Benign	Benign	Benign	1	0	0.465687
ISIC_3274592		0.329715	Benign	Benign	Benign	1	0	0.329715
ISIC_3274903		0.412508	Benign	Benign	Benign	1	0	0.412508
ISIC_3278148		0.420752	Benign	Benign	Benign	1	0	0.420752
ISIC_3281252		0.115881	Benign	Benign	Malignant	0	1	-0.884119
ISIC_3291621		0.540639	Benign	Benign	Benign	1	0	0.540639
ISIC_3292151		0.490208	Benign	Benign	Benign	1	0	0.490208
ISIC_3296066		0	Benign	Benign	Benign	1	0	0
ISIC_3296136		0.592166	Benign	Benign	Benign	1	0	0.592166
ISIC_3299783		0.483309	Benign	Benign	Benign	1	0	0.483309
ISIC_3300386		0.488246	Benign	Benign	Benign	1	0	0.488246
ISIC_3303825		0.078027	Benign	Benign	Malignant	0	1	-0.921973
ISIC_3304345		0.309657	Benign	Benign	Benign	1	0	0.309657
ISIC_3307352		0.161715	Benign	Benign	Benign	1	0	0.161715
ISIC_3310625		0.362979	Benign	Benign	Benign	1	0	0.362979
ISIC_3314853		0.476329	Benign	Benign	Benign	1	0	0.476329
ISIC_3329099		0.066162	Benign	Benign	Benign	1	0	0.066162
ISIC_3331533		0.365009	Benign	Benign	Benign	1	0	0.365009
ISIC_3333135		0.485232	Benign	Benign	Benign	1	0	0.485232
ISIC_3337833		0.519999	Benign	Benign	Benign	1	0	0.519999
ISIC_3341811		0.493379	Benign	Benign	Benign	1	0	0.493379
ISIC_3349562		0.509267	Benign	Benign	Benign	1	0	0.509267
ISIC_3351401		0.329224	Benign	Benign	Benign	1	0	0.329224
ISIC_3354831		0.417824	Benign	Benign	Benign	1	0	0.417824
ISIC_3356216		0.378228	Benign	Benign	Benign	1	0	0.378228
ISIC_3357584		0.18277	Benign	Benign	Benign	1	0	0.18277
ISIC_3360764		0.563043	Benign	Benign	Benign	1	0	0.563043
ISIC_3365692		0.651892	Benign	Benign	Benign	1	0	0.651892
ISIC_3366103		0.328882	Benign	Benign	Benign	1	0	0.328882
ISIC_3367944		0.227045	Benign	Benign	Benign	1	0	0.227045
ISIC_3368385		0.350357	Benign	Benign	Benign	1	0	0.350357
ISIC_3370255		0.368912	Benign	Benign	Benign	1	0	0.368912
ISIC_3371249		0.831435	Benign	Benign	Benign	1	0	0.831435
ISIC_3371722		0.040908	Benign	Malignant	Malignant	1	1	-0.959092
ISIC_3375921		0.337032	Benign	Benign	Benign	1	0	0.337032
ISIC_3380520		0.169576	Benign	Benign	Benign	1	0	0.169576
ISIC_3380547		0.204446	Benign	Benign	Malignant	0	1	-0.795554
ISIC_3382231		0.176872	Benign	Benign	Malignant	0	1	-0.823128
ISIC_3383481		0.27111	Benign	Malignant	Malignant	1	1	-0.72889
ISIC_3385810		0.324958	Benign	Benign	Benign	1	0	0.324958
ISIC_3391254		0.433273	Benign	Benign	Benign	1	0	0.433273
ISIC_3392433		0.527198	Benign	Benign	Benign	1	0	0.527198
ISIC_3393651		0.351079	Benign	Benign	Benign	1	0	0.351079
ISIC_3394796		0.326251	Benign	Benign	Malignant	0	1	-0.673749
ISIC_3397174		0.458459	Benign	Benign	Benign	1	0	0.458459
ISIC_3397377		0.523253	Benign	Benign	Benign	1	0	0.523253
ISIC_3397583		0.348892	Benign	Benign	Benign	1	0	0.348892
ISIC_3400298		0.464508	Benign	Benign	Benign	1	0	0.464508
ISIC_3401240		0.444228	Benign	Benign	Benign	1	0	0.444228
ISIC_3401780		0.425287	Benign	Benign	Benign	1	0	0.425287
ISIC_3402347		0.659494	Benign	Benign	Benign	1	0	0.659494
ISIC_3413138		0.238737	Benign	Benign	Benign	1	0	0.238737
ISIC_3413657		0.190936	Benign	Benign	Malignant	0	1	-0.809064
ISIC_3417724		0.261631	Benign	Benign	Benign	1	0	0.261631
ISIC_3418068		0.496677	Benign	Benign	Benign	1	0	0.496677
ISIC_3418978		0.516507	Benign	Malignant	Malignant	1	1	-0.483493
ISIC_3426714		0.257415	Benign	Benign	Malignant	0	1	-0.742585
ISIC_3427736		0.515739	Benign	Benign	Benign	1	0	0.515739
ISIC_3427958		0.23966	Benign	Benign	Benign	1	0	0.23966
ISIC_3430311		0.154441	Benign	Malignant	Malignant	1	1	-0.845559
ISIC_3440178		0.647408	Benign	Benign	Benign	1	0	0.647408
ISIC_3441543		0.371263	Benign	Benign	Benign	1	0	0.371263
ISIC_3445393		0	Benign	Benign	Malignant	0	1	-1
						100	16	23.711

## Sheet: Beni_1_alexnet_inceptionresnetv
		Activation Maps Consensus		Network 1	Network 2
Immagine	Immagine	Gradcam-Consensus	True_Label	Alexnet_Scratch	Densenet_Scratch	Predict_Consensus	Penalty	Trustability
ISIC_3134070		0.267058	Benign	Benign	Benign	1	0	0.267058
ISIC_3134415		0.294793	Benign	Benign	Benign	1	0	0.294793
ISIC_3134683		0.06759	Benign	Benign	Benign	1	0	0.06759
ISIC_3136228		0.279087	Benign	Benign	Benign	1	0	0.279087
ISIC_3136263		0	Benign	Benign	Benign	1	0	0
ISIC_3140098		0.259947	Benign	Benign	Benign	1	0	0.259947
ISIC_3142775		0.476274	Benign	Benign	Benign	1	0	0.476274
ISIC_3144003		0.073887	Benign	Benign	Benign	1	0	0.073887
ISIC_3144326		0.271248	Benign	Benign	Benign	1	0	0.271248
ISIC_3147179		0.362817	Benign	Benign	Benign	1	0	0.362817
ISIC_3148361		0.333703	Benign	Benign	Benign	1	0	0.333703
ISIC_3149717		0.520399	Benign	Benign	Benign	1	0	0.520399
ISIC_3151260		0.150607	Benign	Benign	Benign	1	0	0.150607
ISIC_3154716		0.444767	Benign	Benign	Benign	1	0	0.444767
ISIC_3157921		0	Benign	Benign	Benign	1	0	0
ISIC_3160291		0.203247	Benign	Benign	Benign	1	0	0.203247
ISIC_3161477		0.423811	Benign	Benign	Benign	1	0	0.423811
ISIC_3165425		0.216753	Benign	Benign	Benign	1	0	0.216753
ISIC_3167799		0	Benign	Benign	Benign	1	0	0
ISIC_3171941		0.211692	Benign	Benign	Benign	1	0	0.211692
ISIC_3180138		0.222797	Benign	Benign	Benign	1	0	0.222797
ISIC_3183653		0.208742	Benign	Malignant	Malignant	1	1	-0.791258
ISIC_3183946		0.102682	Benign	Benign	Benign	1	0	0.102682
ISIC_3185470		0.36904	Benign	Benign	Benign	1	0	0.36904
ISIC_3198078		0.324682	Benign	Benign	Benign	1	0	0.324682
ISIC_3201945		0.242223	Benign	Benign	Benign	1	0	0.242223
ISIC_3203303		0.560486	Benign	Benign	Benign	1	0	0.560486
ISIC_3204621		0.433073	Benign	Benign	Benign	1	0	0.433073
ISIC_3209641		0.173172	Benign	Benign	Benign	1	0	0.173172
ISIC_3210813		0.560204	Benign	Benign	Benign	1	0	0.560204
ISIC_3213469		0.325732	Benign	Benign	Benign	1	0	0.325732
ISIC_3213484		0.357293	Benign	Benign	Benign	1	0	0.357293
ISIC_3216562		0.030978	Benign	Benign	Benign	1	0	0.030978
ISIC_3219286		0.165054	Benign	Benign	Benign	1	0	0.165054
ISIC_3227705		0.625911	Benign	Benign	Benign	1	0	0.625911
ISIC_3227802		0.725836	Benign	Benign	Benign	1	0	0.725836
ISIC_3229879		0.041733	Benign	Benign	Benign	1	0	0.041733
ISIC_3230164		0.296428	Benign	Benign	Benign	1	0	0.296428
ISIC_3235491		0.108045	Benign	Benign	Benign	1	0	0.108045
ISIC_3238064		0.396959	Benign	Benign	Benign	1	0	0.396959
ISIC_3244329		0.466175	Benign	Benign	Benign	1	0	0.466175
ISIC_3249936		0.460403	Benign	Benign	Benign	1	0	0.460403
ISIC_3255457		0.207186	Benign	Benign	Benign	1	0	0.207186
ISIC_3264124		0.419468	Benign	Benign	Malignant	0	1	-0.580532
ISIC_3267036		0.38854	Benign	Benign	Benign	1	0	0.38854
ISIC_3267929		0.354673	Benign	Benign	Benign	1	0	0.354673
ISIC_3269241		0.286011	Benign	Benign	Benign	1	0	0.286011
ISIC_3269863		0.436935	Benign	Benign	Benign	1	0	0.436935
ISIC_3270209		0	Benign	Benign	Benign	1	0	0
ISIC_3274592		0.107922	Benign	Benign	Benign	1	0	0.107922
ISIC_3274903		0	Benign	Benign	Benign	1	0	0
ISIC_3278148		0.106371	Benign	Benign	Benign	1	0	0.106371
ISIC_3281252		0.548521	Benign	Benign	Benign	1	0	0.548521
ISIC_3291621		0.356562	Benign	Benign	Benign	1	0	0.356562
ISIC_3292151		0.333414	Benign	Benign	Benign	1	0	0.333414
ISIC_3296066		0.386619	Benign	Benign	Benign	1	0	0.386619
ISIC_3296136		0.545375	Benign	Benign	Benign	1	0	0.545375
ISIC_3299783		0.017555	Benign	Benign	Benign	1	0	0.017555
ISIC_3300386		0.004903	Benign	Benign	Benign	1	0	0.004903
ISIC_3303825		0.514208	Benign	Benign	Benign	1	0	0.514208
ISIC_3304345		0.579689	Benign	Benign	Benign	1	0	0.579689
ISIC_3307352		0.504007	Benign	Benign	Benign	1	0	0.504007
ISIC_3310625		0.392475	Benign	Benign	Benign	1	0	0.392475
ISIC_3314853		0.192272	Benign	Benign	Benign	1	0	0.192272
ISIC_3329099		0.502308	Benign	Benign	Benign	1	0	0.502308
ISIC_3331533		0.403595	Benign	Benign	Benign	1	0	0.403595
ISIC_3333135		0	Benign	Benign	Benign	1	0	0
ISIC_3337833		0.459541	Benign	Benign	Benign	1	0	0.459541
ISIC_3341811		0	Benign	Benign	Benign	1	0	0
ISIC_3349562		0.0117	Benign	Benign	Benign	1	0	0.0117
ISIC_3351401		0.173316	Benign	Benign	Benign	1	0	0.173316
ISIC_3354831		0.021237	Benign	Benign	Benign	1	0	0.021237
ISIC_3356216		0.119229	Benign	Benign	Benign	1	0	0.119229
ISIC_3357584		0.050804	Benign	Benign	Benign	1	0	0.050804
ISIC_3360764		0.266967	Benign	Benign	Benign	1	0	0.266967
ISIC_3365692		0.504686	Benign	Benign	Benign	1	0	0.504686
ISIC_3366103		0.18942	Benign	Benign	Benign	1	0	0.18942
ISIC_3367944		0.200077	Benign	Benign	Benign	1	0	0.200077
ISIC_3368385		0.297776	Benign	Benign	Benign	1	0	0.297776
ISIC_3370255		0.051735	Benign	Benign	Benign	1	0	0.051735
ISIC_3371249		0.499088	Benign	Benign	Benign	1	0	0.499088
ISIC_3371722		0.38278	Benign	Malignant	Malignant	1	1	-0.61722
ISIC_3375921		0.69325	Benign	Benign	Benign	1	0	0.69325
ISIC_3380520		0.154048	Benign	Benign	Benign	1	0	0.154048
ISIC_3380547		0.545242	Benign	Benign	Benign	1	0	0.545242
ISIC_3382231		0.642426	Benign	Benign	Malignant	0	1	-0.357574
ISIC_3383481		0.526939	Benign	Malignant	Malignant	1	1	-0.473061
ISIC_3385810		0.20131	Benign	Benign	Benign	1	0	0.20131
ISIC_3391254		0.58765	Benign	Benign	Benign	1	0	0.58765
ISIC_3392433		0.026517	Benign	Benign	Benign	1	0	0.026517
ISIC_3393651		0.613533	Benign	Benign	Benign	1	0	0.613533
ISIC_3394796		0.73836	Benign	Benign	Benign	1	0	0.73836
ISIC_3397174		0.368446	Benign	Benign	Benign	1	0	0.368446
ISIC_3397377		0.025823	Benign	Benign	Benign	1	0	0.025823
ISIC_3397583		0.238263	Benign	Benign	Benign	1	0	0.238263
ISIC_3400298		0.460715	Benign	Benign	Benign	1	0	0.460715
ISIC_3401240		0.15853	Benign	Benign	Malignant	0	1	-0.84147
ISIC_3401780		0.062657	Benign	Benign	Benign	1	0	0.062657
ISIC_3402347		0.241466	Benign	Benign	Benign	1	0	0.241466
ISIC_3413138		0.122278	Benign	Benign	Benign	1	0	0.122278
ISIC_3413657		0.492301	Benign	Benign	Benign	1	0	0.492301
ISIC_3417724		0.283535	Benign	Benign	Benign	1	0	0.283535
ISIC_3418068		0.161029	Benign	Benign	Benign	1	0	0.161029
ISIC_3418978		0.630422	Benign	Malignant	Malignant	1	1	-0.369578
ISIC_3426714		0.717324	Benign	Benign	Malignant	0	1	-0.282676
ISIC_3427736		0	Benign	Benign	Benign	1	0	0
ISIC_3427958		0.271757	Benign	Benign	Benign	1	0	0.271757
ISIC_3430311		0.464884	Benign	Malignant	Malignant	1	1	-0.535116
ISIC_3440178		0	Benign	Benign	Benign	1	0	0
ISIC_3441543		0.44074	Benign	Benign	Benign	1	0	0.44074
ISIC_3445393		0.10412	Benign	Benign	Benign	1	0	0.10412
						107	9	23.8459

## Sheet: Beni_1_alexnet_inceptionv3
		Activation Maps Consensus		Network 1	Network 2
Immagine	Immagine	Gradcam-Consensus	True_Label	Alexnet_Scratch	Densenet_Scratch	Predict_Consensus	Penalty	Trustability
ISIC_3134070		0.472726	Benign	Benign	Benign	1	0	0.472726
ISIC_3134415		0.073214	Benign	Benign	Benign	1	0	0.073214
ISIC_3134683		0.213854	Benign	Benign	Benign	1	0	0.213854
ISIC_3136228		0.005644	Benign	Benign	Benign	1	0	0.005644
ISIC_3136263		0.112987	Benign	Benign	Benign	1	0	0.112987
ISIC_3140098		0.136258	Benign	Benign	Benign	1	0	0.136258
ISIC_3142775		0.309122	Benign	Benign	Benign	1	0	0.309122
ISIC_3144003		0.559391	Benign	Benign	Benign	1	0	0.559391
ISIC_3144326		0	Benign	Benign	Benign	1	0	0
ISIC_3147179		0.462826	Benign	Benign	Benign	1	0	0.462826
ISIC_3148361		0.402829	Benign	Benign	Benign	1	0	0.402829
ISIC_3149717		0.314326	Benign	Benign	Benign	1	0	0.314326
ISIC_3151260		0.33277	Benign	Benign	Benign	1	0	0.33277
ISIC_3154716		0.333768	Benign	Benign	Benign	1	0	0.333768
ISIC_3157921		0.091432	Benign	Benign	Benign	1	0	0.091432
ISIC_3160291		0.123184	Benign	Benign	Benign	1	0	0.123184
ISIC_3161477		0.164584	Benign	Benign	Benign	1	0	0.164584
ISIC_3165425		0.30812	Benign	Benign	Benign	1	0	0.30812
ISIC_3167799		0.431889	Benign	Benign	Benign	1	0	0.431889
ISIC_3171941		0.126522	Benign	Benign	Benign	1	0	0.126522
ISIC_3180138		0.167152	Benign	Benign	Benign	1	0	0.167152
ISIC_3183653		0.343768	Benign	Malignant	Benign	0	1	-0.656232
ISIC_3183946		0.761648	Benign	Benign	Benign	1	0	0.761648
ISIC_3185470		0	Benign	Benign	Malignant	0	1	-1
ISIC_3198078		0.309354	Benign	Benign	Benign	1	0	0.309354
ISIC_3201945		0.505897	Benign	Benign	Benign	1	0	0.505897
ISIC_3203303		0.566403	Benign	Benign	Benign	1	0	0.566403
ISIC_3204621		0.332671	Benign	Benign	Benign	1	0	0.332671
ISIC_3209641		0.401739	Benign	Benign	Benign	1	0	0.401739
ISIC_3210813		0.139513	Benign	Benign	Benign	1	0	0.139513
ISIC_3213469		0.100854	Benign	Benign	Benign	1	0	0.100854
ISIC_3213484		0	Benign	Benign	Malignant	0	1	-1
ISIC_3216562		0.388818	Benign	Benign	Benign	1	0	0.388818
ISIC_3219286		0.29235	Benign	Benign	Benign	1	0	0.29235
ISIC_3227705		0.426386	Benign	Benign	Benign	1	0	0.426386
ISIC_3227802		0.641328	Benign	Benign	Benign	1	0	0.641328
ISIC_3229879		0.223547	Benign	Benign	Benign	1	0	0.223547
ISIC_3230164		0.256074	Benign	Benign	Malignant	0	1	-0.743926
ISIC_3235491		0.20869	Benign	Benign	Benign	1	0	0.20869
ISIC_3238064		0.45768	Benign	Benign	Benign	1	0	0.45768
ISIC_3244329		0.752091	Benign	Benign	Benign	1	0	0.752091
ISIC_3249936		0.629127	Benign	Benign	Benign	1	0	0.629127
ISIC_3255457		0.453449	Benign	Benign	Benign	1	0	0.453449
ISIC_3264124		0.634811	Benign	Benign	Benign	1	0	0.634811
ISIC_3267036		0.17982	Benign	Benign	Benign	1	0	0.17982
ISIC_3267929		0.414258	Benign	Benign	Benign	1	0	0.414258
ISIC_3269241		0.219562	Benign	Benign	Benign	1	0	0.219562
ISIC_3269863		0.553123	Benign	Benign	Benign	1	0	0.553123
ISIC_3270209		0.098349	Benign	Benign	Benign	1	0	0.098349
ISIC_3274592		0.267092	Benign	Benign	Benign	1	0	0.267092
ISIC_3274903		0.359438	Benign	Benign	Benign	1	0	0.359438
ISIC_3278148		0.218886	Benign	Benign	Benign	1	0	0.218886
ISIC_3281252		0.101237	Benign	Benign	Benign	1	0	0.101237
ISIC_3291621		0.72854	Benign	Benign	Benign	1	0	0.72854
ISIC_3292151		0.252855	Benign	Benign	Benign	1	0	0.252855
ISIC_3296066		0.440739	Benign	Benign	Benign	1	0	0.440739
ISIC_3296136		0.766896	Benign	Benign	Benign	1	0	0.766896
ISIC_3299783		0.048036	Benign	Benign	Benign	1	0	0.048036
ISIC_3300386		0.192835	Benign	Benign	Benign	1	0	0.192835
ISIC_3303825		0.249704	Benign	Benign	Malignant	0	1	-0.750296
ISIC_3304345		0.577143	Benign	Benign	Benign	1	0	0.577143
ISIC_3307352		0.28438	Benign	Benign	Benign	1	0	0.28438
ISIC_3310625		0.53606	Benign	Benign	Benign	1	0	0.53606
ISIC_3314853		0.279731	Benign	Benign	Benign	1	0	0.279731
ISIC_3329099		0.234743	Benign	Benign	Benign	1	0	0.234743
ISIC_3331533		0.592966	Benign	Benign	Benign	1	0	0.592966
ISIC_3333135		0.189987	Benign	Benign	Benign	1	0	0.189987
ISIC_3337833		0.533669	Benign	Benign	Benign	1	0	0.533669
ISIC_3341811		0.122996	Benign	Benign	Benign	1	0	0.122996
ISIC_3349562		0.35463	Benign	Benign	Benign	1	0	0.35463
ISIC_3351401		0.181739	Benign	Benign	Benign	1	0	0.181739
ISIC_3354831		0.208744	Benign	Benign	Benign	1	0	0.208744
ISIC_3356216		0.191126	Benign	Benign	Benign	1	0	0.191126
ISIC_3357584		0.322174	Benign	Benign	Benign	1	0	0.322174
ISIC_3360764		0.540925	Benign	Benign	Benign	1	0	0.540925
ISIC_3365692		0.462588	Benign	Benign	Benign	1	0	0.462588
ISIC_3366103		0.350277	Benign	Benign	Benign	1	0	0.350277
ISIC_3367944		0.227928	Benign	Benign	Benign	1	0	0.227928
ISIC_3368385		0.100607	Benign	Benign	Benign	1	0	0.100607
ISIC_3370255		0.140889	Benign	Benign	Benign	1	0	0.140889
ISIC_3371249		0.771754	Benign	Benign	Benign	1	0	0.771754
ISIC_3371722		0.363426	Benign	Malignant	Benign	0	1	-0.636574
ISIC_3375921		0.738745	Benign	Benign	Benign	1	0	0.738745
ISIC_3380520		0.117678	Benign	Benign	Benign	1	0	0.117678
ISIC_3380547		0.538019	Benign	Benign	Benign	1	0	0.538019
ISIC_3382231		0.61824	Benign	Benign	Benign	1	0	0.61824
ISIC_3383481		0.355651	Benign	Malignant	Benign	0	1	-0.644349
ISIC_3385810		0.084675	Benign	Benign	Benign	1	0	0.084675
ISIC_3391254		0.202857	Benign	Benign	Benign	1	0	0.202857
ISIC_3392433		0.421122	Benign	Benign	Benign	1	0	0.421122
ISIC_3393651		0.326293	Benign	Benign	Benign	1	0	0.326293
ISIC_3394796		0.572453	Benign	Benign	Benign	1	0	0.572453
ISIC_3397174		0.263866	Benign	Benign	Benign	1	0	0.263866
ISIC_3397377		0.217216	Benign	Benign	Benign	1	0	0.217216
ISIC_3397583		0.281812	Benign	Benign	Benign	1	0	0.281812
ISIC_3400298		0.194392	Benign	Benign	Benign	1	0	0.194392
ISIC_3401240		0.061357	Benign	Benign	Benign	1	0	0.061357
ISIC_3401780		0.179127	Benign	Benign	Benign	1	0	0.179127
ISIC_3402347		0.498896	Benign	Benign	Benign	1	0	0.498896
ISIC_3413138		0	Benign	Benign	Benign	1	0	0
ISIC_3413657		0.219887	Benign	Benign	Benign	1	0	0.219887
ISIC_3417724		0.3725	Benign	Benign	Benign	1	0	0.3725
ISIC_3418068		0.348573	Benign	Benign	Benign	1	0	0.348573
ISIC_3418978		0.530325	Benign	Malignant	Malignant	1	1	-0.469675
ISIC_3426714		0.3904	Benign	Benign	Benign	1	0	0.3904
ISIC_3427736		0.21263	Benign	Benign	Benign	1	0	0.21263
ISIC_3427958		0.547662	Benign	Benign	Benign	1	0	0.547662
ISIC_3430311		0.634775	Benign	Malignant	Malignant	1	1	-0.365225
ISIC_3440178		0.440965	Benign	Benign	Benign	1	0	0.440965
ISIC_3441543		0.276778	Benign	Benign	Benign	1	0	0.276778
ISIC_3445393		0.050786	Benign	Benign	Malignant	0	1	-0.949214
						103	10	26.3263

## Sheet: Beni_1_alexnet_mobilenetv2
		Activation Maps Consensus		Network 1	Network 2
Immagine	Immagine	Gradcam-Consensus	True_Label	Alexnet_Scratch	Densenet_Scratch	Predict_Consensus	Penalty	Trustability
ISIC_3134070		0.117946	Benign	Benign	Benign	1	0	0.117946
ISIC_3134415		0.10759	Benign	Benign	Benign	1	0	0.10759
ISIC_3134683		0	Benign	Benign	Benign	1	0	0
ISIC_3136228		0.017721	Benign	Benign	Malignant	0	1	-0.982279
ISIC_3136263		0.040236	Benign	Benign	Benign	1	0	0.040236
ISIC_3140098		0.263186	Benign	Benign	Benign	1	0	0.263186
ISIC_3142775		0.193899	Benign	Benign	Benign	1	0	0.193899
ISIC_3144003		0.070383	Benign	Benign	Benign	1	0	0.070383
ISIC_3144326		0.002112	Benign	Benign	Benign	1	0	0.002112
ISIC_3147179		0.002689	Benign	Benign	Benign	1	0	0.002689
ISIC_3148361		0.148205	Benign	Benign	Benign	1	0	0.148205
ISIC_3149717		0.085526	Benign	Benign	Benign	1	0	0.085526
ISIC_3151260		0.007947	Benign	Benign	Benign	1	0	0.007947
ISIC_3154716		0.164591	Benign	Benign	Benign	1	0	0.164591
ISIC_3157921		0.116748	Benign	Benign	Benign	1	0	0.116748
ISIC_3160291		0.357811	Benign	Benign	Benign	1	0	0.357811
ISIC_3161477		0	Benign	Benign	Malignant	0	1	-1
ISIC_3165425		0.535728	Benign	Benign	Benign	1	0	0.535728
ISIC_3167799		0	Benign	Benign	Benign	1	0	0
ISIC_3171941		0.081039	Benign	Benign	Malignant	0	1	-0.918961
ISIC_3180138		0.067818	Benign	Benign	Benign	1	0	0.067818
ISIC_3183653		0.442371	Benign	Malignant	Malignant	1	1	-0.557629
ISIC_3183946		0.222007	Benign	Benign	Benign	1	0	0.222007
ISIC_3185470		0.325144	Benign	Benign	Benign	1	0	0.325144
ISIC_3198078		0.20807	Benign	Benign	Benign	1	0	0.20807
ISIC_3201945		0.012243	Benign	Benign	Benign	1	0	0.012243
ISIC_3203303		0.081127	Benign	Benign	Benign	1	0	0.081127
ISIC_3204621		0.03494	Benign	Benign	Malignant	0	1	-0.96506
ISIC_3209641		0.443998	Benign	Benign	Benign	1	0	0.443998
ISIC_3210813		0.413683	Benign	Benign	Benign	1	0	0.413683
ISIC_3213469		0.094295	Benign	Benign	Malignant	0	1	-0.905705
ISIC_3213484		0	Benign	Benign	Malignant	0	1	-1
ISIC_3216562		0	Benign	Benign	Benign	1	0	0
ISIC_3219286		0.114522	Benign	Benign	Benign	1	0	0.114522
ISIC_3227705		0.477674	Benign	Benign	Benign	1	0	0.477674
ISIC_3227802		0.526329	Benign	Benign	Benign	1	0	0.526329
ISIC_3229879		0	Benign	Benign	Benign	1	0	0
ISIC_3230164		0.446134	Benign	Benign	Malignant	0	1	-0.553866
ISIC_3235491		0.045573	Benign	Benign	Benign	1	0	0.045573
ISIC_3238064		0.332171	Benign	Benign	Benign	1	0	0.332171
ISIC_3244329		0.155	Benign	Benign	Benign	1	0	0.155
ISIC_3249936		0.423747	Benign	Benign	Benign	1	0	0.423747
ISIC_3255457		0.159259	Benign	Benign	Benign	1	0	0.159259
ISIC_3264124		0.251177	Benign	Benign	Benign	1	0	0.251177
ISIC_3267036		0.218399	Benign	Benign	Benign	1	0	0.218399
ISIC_3267929		0.228627	Benign	Benign	Benign	1	0	0.228627
ISIC_3269241		0.077594	Benign	Benign	Benign	1	0	0.077594
ISIC_3269863		0.312786	Benign	Benign	Benign	1	0	0.312786
ISIC_3270209		0	Benign	Benign	Benign	1	0	0
ISIC_3274592		0	Benign	Benign	Benign	1	0	0
ISIC_3274903		0	Benign	Benign	Benign	1	0	0
ISIC_3278148		0.040491	Benign	Benign	Benign	1	0	0.040491
ISIC_3281252		0.680008	Benign	Benign	Benign	1	0	0.680008
ISIC_3291621		0.064984	Benign	Benign	Benign	1	0	0.064984
ISIC_3292151		0.051896	Benign	Benign	Benign	1	0	0.051896
ISIC_3296066		0.240453	Benign	Benign	Benign	1	0	0.240453
ISIC_3296136		0.495647	Benign	Benign	Benign	1	0	0.495647
ISIC_3299783		0.057327	Benign	Benign	Benign	1	0	0.057327
ISIC_3300386		0	Benign	Benign	Benign	1	0	0
ISIC_3303825		0.263529	Benign	Benign	Malignant	0	1	-0.736471
ISIC_3304345		0.337033	Benign	Benign	Benign	1	0	0.337033
ISIC_3307352		0.456718	Benign	Benign	Benign	1	0	0.456718
ISIC_3310625		0.209635	Benign	Benign	Benign	1	0	0.209635
ISIC_3314853		0.266699	Benign	Benign	Benign	1	0	0.266699
ISIC_3329099		0.284208	Benign	Benign	Benign	1	0	0.284208
ISIC_3331533		0.352251	Benign	Benign	Benign	1	0	0.352251
ISIC_3333135		0.200819	Benign	Benign	Benign	1	0	0.200819
ISIC_3337833		0.193737	Benign	Benign	Benign	1	0	0.193737
ISIC_3341811		0.027712	Benign	Benign	Benign	1	0	0.027712
ISIC_3349562		0	Benign	Benign	Benign	1	0	0
ISIC_3351401		0.190139	Benign	Benign	Benign	1	0	0.190139
ISIC_3354831		0.174405	Benign	Benign	Benign	1	0	0.174405
ISIC_3356216		0	Benign	Benign	Benign	1	0	0
ISIC_3357584		0.304622	Benign	Benign	Benign	1	0	0.304622
ISIC_3360764		0.001936	Benign	Benign	Benign	1	0	0.001936
ISIC_3365692		0.284027	Benign	Benign	Benign	1	0	0.284027
ISIC_3366103		0	Benign	Benign	Benign	1	0	0
ISIC_3367944		0.253473	Benign	Benign	Benign	1	0	0.253473
ISIC_3368385		0.276038	Benign	Benign	Benign	1	0	0.276038
ISIC_3370255		0	Benign	Benign	Benign	1	0	0
ISIC_3371249		0.71045	Benign	Benign	Benign	1	0	0.71045
ISIC_3371722		0.327075	Benign	Malignant	Malignant	1	1	-0.672925
ISIC_3375921		0.243535	Benign	Benign	Benign	1	0	0.243535
ISIC_3380520		0.182921	Benign	Benign	Benign	1	0	0.182921
ISIC_3380547		0.296667	Benign	Benign	Benign	1	0	0.296667
ISIC_3382231		0.651877	Benign	Benign	Benign	1	0	0.651877
ISIC_3383481		0.47978	Benign	Malignant	Malignant	1	1	-0.52022
ISIC_3385810		0	Benign	Benign	Benign	1	0	0
ISIC_3391254		0.396905	Benign	Benign	Benign	1	0	0.396905
ISIC_3392433		0.101983	Benign	Benign	Benign	1	0	0.101983
ISIC_3393651		0.441056	Benign	Benign	Benign	1	0	0.441056
ISIC_3394796		0.644662	Benign	Benign	Benign	1	0	0.644662
ISIC_3397174		0.154019	Benign	Benign	Benign	1	0	0.154019
ISIC_3397377		0	Benign	Benign	Benign	1	0	0
ISIC_3397583		0.276375	Benign	Benign	Benign	1	0	0.276375
ISIC_3400298		0	Benign	Benign	Benign	1	0	0
ISIC_3401240		0.436566	Benign	Benign	Benign	1	0	0.436566
ISIC_3401780		0.119922	Benign	Benign	Benign	1	0	0.119922
ISIC_3402347		0.161373	Benign	Benign	Benign	1	0	0.161373
ISIC_3413138		0.048151	Benign	Benign	Benign	1	0	0.048151
ISIC_3413657		0.346669	Benign	Benign	Benign	1	0	0.346669
ISIC_3417724		0.148837	Benign	Benign	Benign	1	0	0.148837
ISIC_3418068		0.26119	Benign	Benign	Benign	1	0	0.26119
ISIC_3418978		0.581061	Benign	Malignant	Malignant	1	1	-0.418939
ISIC_3426714		0.383156	Benign	Benign	Benign	1	0	0.383156
ISIC_3427736		0	Benign	Benign	Benign	1	0	0
ISIC_3427958		0.225855	Benign	Benign	Benign	1	0	0.225855
ISIC_3430311		0.516178	Benign	Malignant	Malignant	1	1	-0.483822
ISIC_3440178		0	Benign	Benign	Benign	1	0	0
ISIC_3441543		0.190107	Benign	Benign	Benign	1	0	0.190107
ISIC_3445393		0.402572	Benign	Benign	Benign	1	0	0.402572
						103	13	9.86477

## Sheet: Beni_1_alexnet_resnet18
		Activation Maps Consensus		Network 1	Network 2
Immagine	Immagine	Gradcam-Consensus	True_Label	Alexnet_Scratch	Densenet_Scratch	Predict_Consensus	Penalty	Trustability
ISIC_3134070		0.068066	Benign	Benign	Benign	1	0	0.068066
ISIC_3134415		0.224431	Benign	Benign	Benign	1	0	0.224431
ISIC_3134683		0	Benign	Benign	Benign	1	0	0
ISIC_3136228		0.502905	Benign	Benign	Benign	1	0	0.502905
ISIC_3136263		0	Benign	Benign	Benign	1	0	0
ISIC_3140098		0	Benign	Benign	Benign	1	0	0
ISIC_3142775		0.328473	Benign	Benign	Benign	1	0	0.328473
ISIC_3144003		0	Benign	Benign	Benign	1	0	0
ISIC_3144326		0	Benign	Benign	Benign	1	0	0
ISIC_3147179		0.31761	Benign	Benign	Benign	1	0	0.31761
ISIC_3148361		0	Benign	Benign	Benign	1	0	0
ISIC_3149717		0.444421	Benign	Benign	Benign	1	0	0.444421
ISIC_3151260		0.335831	Benign	Benign	Benign	1	0	0.335831
ISIC_3154716		0.375701	Benign	Benign	Benign	1	0	0.375701
ISIC_3157921		0	Benign	Benign	Benign	1	0	0
ISIC_3160291		0.26791	Benign	Benign	Benign	1	0	0.26791
ISIC_3161477		0.303486	Benign	Benign	Benign	1	0	0.303486
ISIC_3165425		0.336297	Benign	Benign	Benign	1	0	0.336297
ISIC_3167799		0	Benign	Benign	Benign	1	0	0
ISIC_3171941		0.198059	Benign	Benign	Benign	1	0	0.198059
ISIC_3180138		0.146558	Benign	Benign	Benign	1	0	0.146558
ISIC_3183653		0.083894	Benign	Malignant	Benign	0	1	-0.916106
ISIC_3183946		0	Benign	Benign	Benign	1	0	0
ISIC_3185470		0.621173	Benign	Benign	Benign	1	0	0.621173
ISIC_3198078		0	Benign	Benign	Benign	1	0	0
ISIC_3201945		0	Benign	Benign	Benign	1	0	0
ISIC_3203303		0.064766	Benign	Benign	Benign	1	0	0.064766
ISIC_3204621		0.146482	Benign	Benign	Malignant	0	1	-0.853518
ISIC_3209641		0.051209	Benign	Benign	Benign	1	0	0.051209
ISIC_3210813		0.678471	Benign	Benign	Benign	1	0	0.678471
ISIC_3213469		0.367219	Benign	Benign	Benign	1	0	0.367219
ISIC_3213484		0	Benign	Benign	Malignant	0	1	-1
ISIC_3216562		0	Benign	Benign	Benign	1	0	0
ISIC_3219286		0.048474	Benign	Benign	Benign	1	0	0.048474
ISIC_3227705		0.616742	Benign	Benign	Benign	1	0	0.616742
ISIC_3227802		0.462851	Benign	Benign	Benign	1	0	0.462851
ISIC_3229879		0.228728	Benign	Benign	Benign	1	0	0.228728
ISIC_3230164		0.190959	Benign	Benign	Malignant	0	1	-0.809041
ISIC_3235491		0	Benign	Benign	Benign	1	0	0
ISIC_3238064		0.521658	Benign	Benign	Benign	1	0	0.521658
ISIC_3244329		0.425925	Benign	Benign	Benign	1	0	0.425925
ISIC_3249936		0.36065	Benign	Benign	Benign	1	0	0.36065
ISIC_3255457		0.167841	Benign	Benign	Benign	1	0	0.167841
ISIC_3264124		0.636308	Benign	Benign	Benign	1	0	0.636308
ISIC_3267036		0.414801	Benign	Benign	Benign	1	0	0.414801
ISIC_3267929		0.237676	Benign	Benign	Benign	1	0	0.237676
ISIC_3269241		0.140371	Benign	Benign	Benign	1	0	0.140371
ISIC_3269863		0.661369	Benign	Benign	Benign	1	0	0.661369
ISIC_3270209		0	Benign	Benign	Benign	1	0	0
ISIC_3274592		0	Benign	Benign	Benign	1	0	0
ISIC_3274903		0	Benign	Benign	Benign	1	0	0
ISIC_3278148		0	Benign	Benign	Benign	1	0	0
ISIC_3281252		0.651012	Benign	Benign	Benign	1	0	0.651012
ISIC_3291621		0.055471	Benign	Benign	Benign	1	0	0.055471
ISIC_3292151		0	Benign	Benign	Benign	1	0	0
ISIC_3296066		0.444906	Benign	Benign	Benign	1	0	0.444906
ISIC_3296136		0.678147	Benign	Benign	Benign	1	0	0.678147
ISIC_3299783		0	Benign	Benign	Benign	1	0	0
ISIC_3300386		0	Benign	Benign	Benign	1	0	0
ISIC_3303825		0.301348	Benign	Benign	Malignant	0	1	-0.698652
ISIC_3304345		0.671811	Benign	Benign	Benign	1	0	0.671811
ISIC_3307352		0.423057	Benign	Benign	Benign	1	0	0.423057
ISIC_3310625		0.180453	Benign	Benign	Benign	1	0	0.180453
ISIC_3314853		0.307368	Benign	Benign	Benign	1	0	0.307368
ISIC_3329099		0.313229	Benign	Benign	Benign	1	0	0.313229
ISIC_3331533		0.535305	Benign	Benign	Benign	1	0	0.535305
ISIC_3333135		0	Benign	Benign	Benign	1	0	0
ISIC_3337833		0.335962	Benign	Benign	Benign	1	0	0.335962
ISIC_3341811		0	Benign	Benign	Benign	1	0	0
ISIC_3349562		0	Benign	Benign	Benign	1	0	0
ISIC_3351401		0	Benign	Benign	Benign	1	0	0
ISIC_3354831		0	Benign	Benign	Benign	1	0	0
ISIC_3356216		0	Benign	Benign	Benign	1	0	0
ISIC_3357584		0.247112	Benign	Benign	Benign	1	0	0.247112
ISIC_3360764		0.00427	Benign	Benign	Benign	1	0	0.00427
ISIC_3365692		0	Benign	Benign	Benign	1	0	0
ISIC_3366103		0	Benign	Benign	Benign	1	0	0
ISIC_3367944		0.067203	Benign	Benign	Benign	1	0	0.067203
ISIC_3368385		0.440649	Benign	Benign	Benign	1	0	0.440649
ISIC_3370255		0	Benign	Benign	Benign	1	0	0
ISIC_3371249		0.735829	Benign	Benign	Benign	1	0	0.735829
ISIC_3371722		0.194511	Benign	Malignant	Malignant	1	1	-0.805489
ISIC_3375921		0.561865	Benign	Benign	Benign	1	0	0.561865
ISIC_3380520		0.038977	Benign	Benign	Benign	1	0	0.038977
ISIC_3380547		0.709689	Benign	Benign	Benign	1	0	0.709689
ISIC_3382231		0.691257	Benign	Benign	Benign	1	0	0.691257
ISIC_3383481		0.407797	Benign	Malignant	Malignant	1	1	-0.592203
ISIC_3385810		0	Benign	Benign	Benign	1	0	0
ISIC_3391254		0.601266	Benign	Benign	Benign	1	0	0.601266
ISIC_3392433		0	Benign	Benign	Benign	1	0	0
ISIC_3393651		0.658237	Benign	Benign	Benign	1	0	0.658237
ISIC_3394796		0.652014	Benign	Benign	Benign	1	0	0.652014
ISIC_3397174		0	Benign	Benign	Benign	1	0	0
ISIC_3397377		0.00032	Benign	Benign	Benign	1	0	0.00032
ISIC_3397583		0.263916	Benign	Benign	Benign	1	0	0.263916
ISIC_3400298		0	Benign	Benign	Benign	1	0	0
ISIC_3401240		0.053077	Benign	Benign	Benign	1	0	0.053077
ISIC_3401780		0	Benign	Benign	Benign	1	0	0
ISIC_3402347		0.227537	Benign	Benign	Benign	1	0	0.227537
ISIC_3413138		0.324147	Benign	Benign	Benign	1	0	0.324147
ISIC_3413657		0.342415	Benign	Benign	Benign	1	0	0.342415
ISIC_3417724		0.10157	Benign	Benign	Benign	1	0	0.10157
ISIC_3418068		0.044278	Benign	Benign	Benign	1	0	0.044278
ISIC_3418978		0.715816	Benign	Malignant	Malignant	1	1	-0.284184
ISIC_3426714		0.645619	Benign	Benign	Benign	1	0	0.645619
ISIC_3427736		0	Benign	Benign	Benign	1	0	0
ISIC_3427958		0.009361	Benign	Benign	Benign	1	0	0.009361
ISIC_3430311		0.393074	Benign	Malignant	Malignant	1	1	-0.606926
ISIC_3440178		0	Benign	Benign	Benign	1	0	0
ISIC_3441543		0.136089	Benign	Benign	Benign	1	0	0.136089
ISIC_3445393		0.244509	Benign	Benign	Malignant	0	1	-0.755491
						105	10	15.3878

## Sheet: Beni_1_alexnet_resnet50
		Activation Maps Consensus		Network 1	Network 2
Immagine	Immagine	Gradcam-Consensus	True_Label	Alexnet_Scratch	Densenet_Scratch	Predict_Consensus	Penalty	Trustability
ISIC_3134070		0	Benign	Benign	Benign	1	0	0
ISIC_3134415		0.299748	Benign	Benign	Benign	1	0	0.299748
ISIC_3134683		0	Benign	Benign	Benign	1	0	0
ISIC_3136228		0.430196	Benign	Benign	Benign	1	0	0.430196
ISIC_3136263		0	Benign	Benign	Benign	1	0	0
ISIC_3140098		0	Benign	Benign	Benign	1	0	0
ISIC_3142775		0.437839	Benign	Benign	Benign	1	0	0.437839
ISIC_3144003		0	Benign	Benign	Benign	1	0	0
ISIC_3144326		0.151811	Benign	Benign	Benign	1	0	0.151811
ISIC_3147179		0.201334	Benign	Benign	Benign	1	0	0.201334
ISIC_3148361		0.052714	Benign	Benign	Benign	1	0	0.052714
ISIC_3149717		0.217056	Benign	Benign	Benign	1	0	0.217056
ISIC_3151260		0.386525	Benign	Benign	Benign	1	0	0.386525
ISIC_3154716		0.359508	Benign	Benign	Benign	1	0	0.359508
ISIC_3157921		0	Benign	Benign	Benign	1	0	0
ISIC_3160291		0.240531	Benign	Benign	Benign	1	0	0.240531
ISIC_3161477		0.111126	Benign	Benign	Benign	1	0	0.111126
ISIC_3165425		0.39459	Benign	Benign	Benign	1	0	0.39459
ISIC_3167799		0	Benign	Benign	Benign	1	0	0
ISIC_3171941		0.259651	Benign	Benign	Benign	1	0	0.259651
ISIC_3180138		0.117859	Benign	Benign	Benign	1	0	0.117859
ISIC_3183653		0.066433	Benign	Malignant	Benign	0	1	-0.933567
ISIC_3183946		0	Benign	Benign	Benign	1	0	0
ISIC_3185470		0.491967	Benign	Benign	Benign	1	0	0.491967
ISIC_3198078		0.100226	Benign	Benign	Benign	1	0	0.100226
ISIC_3201945		0	Benign	Benign	Benign	1	0	0
ISIC_3203303		0.475404	Benign	Benign	Benign	1	0	0.475404
ISIC_3204621		0.139526	Benign	Benign	Malignant	0	1	-0.860474
ISIC_3209641		0.203021	Benign	Benign	Benign	1	0	0.203021
ISIC_3210813		0.461297	Benign	Benign	Benign	1	0	0.461297
ISIC_3213469		0	Benign	Benign	Malignant	0	1	-1
ISIC_3213484		0.586215	Benign	Benign	Benign	1	0	0.586215
ISIC_3216562		0	Benign	Benign	Benign	1	0	0
ISIC_3219286		0.097772	Benign	Benign	Benign	1	0	0.097772
ISIC_3227705		0.499932	Benign	Benign	Benign	1	0	0.499932
ISIC_3227802		0.61793	Benign	Benign	Benign	1	0	0.61793
ISIC_3229879		0	Benign	Benign	Benign	1	0	0
ISIC_3230164		0.287745	Benign	Benign	Malignant	0	1	-0.712255
ISIC_3235491		0	Benign	Benign	Benign	1	0	0
ISIC_3238064		0.35634	Benign	Benign	Benign	1	0	0.35634
ISIC_3244329		0.421395	Benign	Benign	Benign	1	0	0.421395
ISIC_3249936		0.576466	Benign	Benign	Benign	1	0	0.576466
ISIC_3255457		0.439842	Benign	Benign	Benign	1	0	0.439842
ISIC_3264124		0.609933	Benign	Benign	Benign	1	0	0.609933
ISIC_3267036		0.281916	Benign	Benign	Benign	1	0	0.281916
ISIC_3267929		0.182491	Benign	Benign	Benign	1	0	0.182491
ISIC_3269241		0.188092	Benign	Benign	Benign	1	0	0.188092
ISIC_3269863		0.694998	Benign	Benign	Benign	1	0	0.694998
ISIC_3270209		0	Benign	Benign	Benign	1	0	0
ISIC_3274592		0	Benign	Benign	Benign	1	0	0
ISIC_3274903		0	Benign	Benign	Benign	1	0	0
ISIC_3278148		0	Benign	Benign	Benign	1	0	0
ISIC_3281252		0.488686	Benign	Benign	Benign	1	0	0.488686
ISIC_3291621		0.127461	Benign	Benign	Benign	1	0	0.127461
ISIC_3292151		0	Benign	Benign	Benign	1	0	0
ISIC_3296066		0.189549	Benign	Benign	Benign	1	0	0.189549
ISIC_3296136		0.562245	Benign	Benign	Benign	1	0	0.562245
ISIC_3299783		0	Benign	Benign	Benign	1	0	0
ISIC_3300386		0	Benign	Benign	Benign	1	0	0
ISIC_3303825		0.284625	Benign	Benign	Benign	1	0	0.284625
ISIC_3304345		0.523354	Benign	Benign	Benign	1	0	0.523354
ISIC_3307352		0.300825	Benign	Benign	Benign	1	0	0.300825
ISIC_3310625		0.164493	Benign	Benign	Benign	1	0	0.164493
ISIC_3314853		0.166892	Benign	Benign	Benign	1	0	0.166892
ISIC_3329099		0.474518	Benign	Benign	Benign	1	0	0.474518
ISIC_3331533		0.422878	Benign	Benign	Benign	1	0	0.422878
ISIC_3333135		0	Benign	Benign	Benign	1	0	0
ISIC_3337833		0.325932	Benign	Benign	Benign	1	0	0.325932
ISIC_3341811		0	Benign	Benign	Benign	1	0	0
ISIC_3349562		0.065633	Benign	Benign	Benign	1	0	0.065633
ISIC_3351401		0.083986	Benign	Benign	Benign	1	0	0.083986
ISIC_3354831		0	Benign	Benign	Benign	1	0	0
ISIC_3356216		0	Benign	Benign	Benign	1	0	0
ISIC_3357584		0.168448	Benign	Benign	Benign	1	0	0.168448
ISIC_3360764		0.040045	Benign	Benign	Benign	1	0	0.040045
ISIC_3365692		0.088616	Benign	Benign	Benign	1	0	0.088616
ISIC_3366103		0	Benign	Benign	Benign	1	0	0
ISIC_3367944		0.106654	Benign	Benign	Benign	1	0	0.106654
ISIC_3368385		0.321765	Benign	Benign	Benign	1	0	0.321765
ISIC_3370255		0	Benign	Benign	Benign	1	0	0
ISIC_3371249		0.675923	Benign	Benign	Benign	1	0	0.675923
ISIC_3371722		0.288226	Benign	Malignant	Malignant	1	1	-0.711774
ISIC_3375921		0.508416	Benign	Benign	Benign	1	0	0.508416
ISIC_3380520		0.141879	Benign	Benign	Benign	1	0	0.141879
ISIC_3380547		0.521149	Benign	Benign	Benign	1	0	0.521149
ISIC_3382231		0.575324	Benign	Benign	Benign	1	0	0.575324
ISIC_3383481		0.395496	Benign	Malignant	Benign	0	1	-0.604504
ISIC_3385810		0	Benign	Benign	Benign	1	0	0
ISIC_3391254		0.448464	Benign	Benign	Benign	1	0	0.448464
ISIC_3392433		0.007815	Benign	Benign	Benign	1	0	0.007815
ISIC_3393651		0.636979	Benign	Benign	Benign	1	0	0.636979
ISIC_3394796		0.64212	Benign	Benign	Benign	1	0	0.64212
ISIC_3397174		0	Benign	Benign	Benign	1	0	0
ISIC_3397377		0.002586	Benign	Benign	Benign	1	0	0.002586
ISIC_3397583		0.299947	Benign	Benign	Benign	1	0	0.299947
ISIC_3400298		0	Benign	Benign	Benign	1	0	0
ISIC_3401240		0.142451	Benign	Benign	Benign	1	0	0.142451
ISIC_3401780		0	Benign	Benign	Benign	1	0	0
ISIC_3402347		0.231029	Benign	Benign	Benign	1	0	0.231029
ISIC_3413138		0.189968	Benign	Benign	Benign	1	0	0.189968
ISIC_3413657		0.501205	Benign	Benign	Benign	1	0	0.501205
ISIC_3417724		0	Benign	Benign	Benign	1	0	0
ISIC_3418068		0.086042	Benign	Benign	Benign	1	0	0.086042
ISIC_3418978		0.438383	Benign	Malignant	Benign	0	1	-0.561617
ISIC_3426714		0.61518	Benign	Benign	Benign	1	0	0.61518
ISIC_3427736		0	Benign	Benign	Benign	1	0	0
ISIC_3427958		0.186594	Benign	Benign	Benign	1	0	0.186594
ISIC_3430311		0.289974	Benign	Malignant	Benign	0	1	-0.710026
ISIC_3440178		0	Benign	Benign	Benign	1	0	0
ISIC_3441543		0.098678	Benign	Benign	Benign	1	0	0.098678
ISIC_3445393		0.116921	Benign	Benign	Malignant	0	1	-0.883079
						103	9	15.3868

[truncated: 160 more sheets: Beni_1_alexnet_shufflenet, Beni_1_alexnet_vgg16, Beni_1_alexnet_vgg19, Beni_1_alexnet_xception, Beni_1_densenet_alexnet, Beni_1_densenet_densenet, Beni_1_densenet_efficientnetb0, Beni_1_densenet_googlenet, Beni_1_densenet_inceptionresnet, Beni_1_densenet_inceptionv3, Beni_1_densenet_mobilenetv2, Beni_1_densenet_resnet18, Beni_1_densenet_resnet50, Beni_1_densenet_shufflenet, Beni_1_densenet_vgg16, Beni_1_densenet_vgg19, Beni_1_densenet_xception, Beni_1_efficientnetb0_alexnet, Beni_1_efficientnetb0_densenet, Beni_1_efficientnetb0_efficient …]
