# Supplementary material for: Towards trustworthy digital health: reliability of uncertainty-aware convolutional neural networks
Source: PeerJ journal article supplement (doi:10.7717/peerj-cs.3414), 2026-01-28
Supplement: trustworthinessmain.zip [file CNNs_Vs_Melanoma_Malignant.xlsx]

## Sheet: Malignant_trust_recap
	Network 1	Network 2	Class	Trustworthiness
	Alexnet	Alexnet	Malignant	0.615385
	Alexnet	Densenet	Malignant	-0.0545779
	Alexnet	Efficientnetb0	Malignant	-0.0959243
	Alexnet	Googlenet	Malignant	-0.041063
	Alexnet	inceptionresnetv2	Malignant	-0.037338
	Alexnet	inceptionv3	Malignant	-0.112483
	Alexnet	mobilenetv2	Malignant	-0.0737301
	Alexnet	resnet18	Malignant	-0.0344776
	Alexnet	resnet50	Malignant	-0.0406752
	Alexnet	shufflenet	Malignant	-0.0598642
	Alexnet	vgg16	Malignant	-0.0455432
	Alexnet	vgg19	Malignant	-0.0551288
	Alexnet	xception	Malignant	-0.088044
	Densenet	Alexnet	Malignant	-0.0545779
	Densenet	Densenet	Malignant	0.615385
	Densenet	Efficientnetb0	Malignant	0.0623413
	Densenet	Googlenet	Malignant	-0.135713
	Densenet	inceptionresnetv2	Malignant	0.0514244
	Densenet	inceptionv3	Malignant	-0.0487989
	Densenet	mobilenetv2	Malignant	0.018169
	Densenet	resnet18	Malignant	0.0314031
	Densenet	resnet50	Malignant	0.0329315
	Densenet	shufflenet	Malignant	-0.0299641
	Densenet	vgg16	Malignant	0.164171
	Densenet	vgg19	Malignant	0.113941
	Densenet	xception	Malignant	0.0770129
	Efficientnetb0	Alexnet	Malignant	-0.0959243
	Efficientnetb0	Densenet	Malignant	0.0623413
	Efficientnetb0	Efficientnetb0	Malignant	0.692308
	Efficientnetb0	Googlenet	Malignant	-0.152589
	Efficientnetb0	inceptionresnetv2	Malignant	0.0643881
	Efficientnetb0	inceptionv3	Malignant	-0.0820496
	Efficientnetb0	mobilenetv2	Malignant	0.0383697
	Efficientnetb0	resnet18	Malignant	0.0307148
	Efficientnetb0	resnet50	Malignant	0.0152871
	Efficientnetb0	shufflenet	Malignant	0.0879996
	Efficientnetb0	vgg16	Malignant	0.221953
	Efficientnetb0	vgg19	Malignant	0.251688
	Efficientnetb0	xception	Malignant	0.00891867
	GoogleNet	Alexnet	Malignant	-0.041063
	GoogleNet	densenet	Malignant	-0.135713
	GoogleNet	Efficientnetb0	Malignant	-0.152589
	GoogleNet	Googlenet	Malignant	0.78022
	GoogleNet	Inceptionresnetv2	Malignant	-0.0999304
	GoogleNet	inceptionv3	Malignant	-0.0653181
	GoogleNet	Mobilenetv2	Malignant	-0.0986526
	GoogleNet	resnet18	Malignant	-0.104954
	GoogleNet	resnet50	Malignant	-0.132599
	GoogleNet	Shufflenet	Malignant	-0.159518
	GoogleNet	vgg16	Malignant	-0.0815712
	GoogleNet	vgg19	Malignant	-0.0940608
	GoogleNet	xception	Malignant	-0.150826
	Inceptionresnetv2	Alexnet	Malignant	-0.037338
	Inceptionresnetv2	Densenet	Malignant	0.0514244
	Inceptionresnetv2	Efficientnetb0	Malignant	0.0643881
	Inceptionresnetv2	Googlenet	Malignant	-0.0999304
	Inceptionresnetv2	inceptionresnetv2	Malignant	0.681319
	Inceptionresnetv2	inceptionv3	Malignant	-0.00519036
	Inceptionresnetv2	mobilenetv2	Malignant	0.0841884
	Inceptionresnetv2	resnet18	Malignant	0.122605
	Inceptionresnetv2	resnet50	Malignant	0.0679677
	Inceptionresnetv2	shufflenet	Malignant	0.0731056
	Inceptionresnetv2	vgg16	Malignant	0.146935
	Inceptionresnetv2	vgg19	Malignant	0.145291
	Inceptionresnetv2	xception	Malignant	0.168991
	inceptionv3	Alexnet	Malignant	-0.112483
	inceptionv3	Densenet	Malignant	-0.0487989
	inceptionv3	Efficientnetb0	Malignant	-0.0820496
	inceptionv3	Googlenet	Malignant	-0.0653181
	inceptionv3	inceptionresnetv2	Malignant	-0.00519036
	inceptionv3	inceptionv3	Malignant	0.582418
	inceptionv3	mobilenetv2	Malignant	-0.0916366
	inceptionv3	resnet18	Malignant	-0.034588
	inceptionv3	resnet50	Malignant	-0.0325371
	inceptionv3	shufflenet	Malignant	-0.0695657
	inceptionv3	vgg16	Malignant	-0.0125937
	inceptionv3	vgg19	Malignant	-0.0300941
	inceptionv3	xception	Malignant	-0.0433639
	mobilenetv2	Alexnet	Malignant	-0.0737301
	mobilenetv2	Densenet	Malignant	0.018169
	mobilenetv2	Efficientnetb0	Malignant	0.0383697
	mobilenetv2	Googlenet	Malignant	-0.0986526
	mobilenetv2	inceptionresnetv2	Malignant	0.0841884
	mobilenetv2	inceptionv3	Malignant	-0.0916366
	mobilenetv2	mobilenetv2	Malignant	0.67033
	mobilenetv2	resnet18	Malignant	0.0500746
	mobilenetv2	resnet50	Malignant	0.00555796
	mobilenetv2	shufflenet	Malignant	0.0127957
	mobilenetv2	vgg16	Malignant	0.0807276
	mobilenetv2	vgg19	Malignant	0.0503864
	mobilenetv2	xception	Malignant	0.032123
	resnet18	Alexnet	Malignant	-0.0344776
	resnet18	Densenet	Malignant	0.0314031
	resnet18	Efficientnetb0	Malignant	0.0307148
	resnet18	Googlenet	Malignant	-0.104954
	resnet18	inceptionresnetv2	Malignant	0.122605
	resnet18	inceptionv3	Malignant	-0.034588
	resnet18	mobilenetv2	Malignant	0.0500746
	resnet18	resnet18	Malignant	0.659341
	resnet18	resnet50	Malignant	0.175567
	resnet18	shufflenet	Malignant	0.0585072
	resnet18	vgg16	Malignant	0.0961948
	resnet18	vgg19	Malignant	0.0887642
	resnet18	xception	Malignant	0.103037
	resnet50	Alexnet	Malignant	-0.0406752
	resnet50	Densenet	Malignant	0.0329315
	resnet50	Efficientnetb0	Malignant	0.0152871
	resnet50	Googlenet	Malignant	-0.132599
	resnet50	inceptionresnetv2	Malignant	0.0679677
	resnet50	inceptionv3	Malignant	-0.0325371
	resnet50	mobilenetv2	Malignant	0.00555796
	resnet50	resnet18	Malignant	0.175567
	resnet50	resnet50	Malignant	0.637363
	resnet50	shufflenet	Malignant	0.0187234
	resnet50	vgg16	Malignant	0.0772279
	resnet50	vgg19	Malignant	0.0724375
	resnet50	exception	Malignant	0.0418123
	Shufflenet	Alexnet	Malignant	-0.0598642
	Shufflenet	Densenet	Malignant	-0.0299641
	Shufflenet	efficientnetb0	Malignant	0.0879996
	Shufflenet	googlenet	Malignant	-0.159518
	Shufflenet	inceptionresnetv2	Malignant	0.0731056
	Shufflenet	inceptionv3	Malignant	-0.0695657
	Shufflenet	mobilenetv2	Malignant	0.0127957
	Shufflenet	resnet18	Malignant	0.0585072
	Shufflenet	resnet50	Malignant	0.0187234
	Shufflenet	shufflenet	Malignant	0.648352
	Shufflenet	vgg16	Malignant	0.102914
	Shufflenet	vgg19	Malignant	0.124162
	Shufflenet	xception	Malignant	-0.0106693
	vgg16	Alexnet	Malignant	-0.0455432
	vgg16	Densenet	Malignant	0.164171
	vgg16	efficientnetb0	Malignant	0.221953
	vgg16	googlenet	Malignant	-0.0815712
	vgg16	inceptionresnetv2	Malignant	0.146935
	vgg16	inceptionv3	Malignant	-0.0125937
	vgg16	mobilenetv2	Malignant	0.0807276
	vgg16	resnet18	Malignant	0.0961948
	vgg16	resnet50	Malignant	0.0772279
	vgg16	shufflenet	Malignant	0.102914
	vgg16	vgg16	Malignant	0.736264
	vgg16	vgg19	Malignant	0.351754
	vgg16	xception	Malignant	0.116743
	vgg19	Alexnet	Malignant	-0.0551288
	vgg19	Densenet	Malignant	0.113941
	vgg19	efficientnetb0	Malignant	0.251688
	vgg19	googlenet	Malignant	-0.0940608
	vgg19	inceptionresnetv2	Malignant	0.145291
	vgg19	inceptionv3	Malignant	-0.0300941
	vgg19	mobilenetv2	Malignant	0.0503864
	vgg19	resnet18	Malignant	0.0887642
	vgg19	resnet50	Malignant	0.0724375
	vgg19	shufflenet	Malignant	0.124162
	vgg19	vgg16	Malignant	0.351754
	vgg19	vgg19	Malignant	0.725275
	vgg19	xception	Malignant	0.110832
	xception	Alexnet	Malignant	-0.088044
	xception	Densenet	Malignant	0.0770129
	xception	efficientnetb0	Malignant	0.00891867
	xception	googlenet	Malignant	-0.150826
	xception	inceptionresnetv2	Malignant	0.168991
	xception	inceptionv3	Malignant	-0.0433639
	xception	mobilenetv2	Malignant	0.032123
	xception	resnet18	Malignant	0.103037
	xception	resnet50	Malignant	0.0418123
	xception	shufflenet	Malignant	-0.0106693
	xception	vgg16	Malignant	0.116743
	xception	vgg19	Malignant	0.110832
	xception	xception	Malignant	0.637363
		Trustworthiness (Malignant)		0.0676805

## Sheet: Mali_1_alexnet_alexnet
		Activation Maps Consensus		Network 1	Network 2
Filename	Immagine	Gradcam-Consensus	True_Label	Net1_Prediction	Net2_Prediction	Predict_Consensus	Penalty	Trustworthiness
ISIC_3301933		1	Malignant	Malignant	Malignant	1	0	1
ISIC_3319229		1	Malignant	Benign	Benign	1	1	0
ISIC_3338629		1	Malignant	Malignant	Malignant	1	0	1
ISIC_3464344		1	Malignant	Benign	Benign	1	1	0
ISIC_3475660		1	Malignant	Malignant	Malignant	1	0	1
ISIC_3733653		1	Malignant	Malignant	Malignant	1	0	1
ISIC_3775417		1	Malignant	Benign	Benign	1	1	0
ISIC_3824206		1	Malignant	Benign	Benign	1	1	0
ISIC_3944634		1	Malignant	Malignant	Malignant	1	0	1
ISIC_3963183		1	Malignant	Malignant	Malignant	1	0	1
ISIC_3996796		1	Malignant	Benign	Benign	1	1	0
ISIC_4377208		1	Malignant	Malignant	Malignant	1	0	1
ISIC_4378189		1	Malignant	Malignant	Malignant	1	0	1
ISIC_4425322		1	Malignant	Malignant	Malignant	1	0	1
ISIC_4584265		1	Malignant	Malignant	Malignant	1	0	1
ISIC_4653503		1	Malignant	Benign	Benign	1	1	0
ISIC_4874581		1	Malignant	Benign	Benign	1	1	0
ISIC_4936662		1	Malignant	Malignant	Malignant	1	0	1
ISIC_4938994		1	Malignant	Malignant	Malignant	1	0	1
ISIC_5046082		1	Malignant	Benign	Benign	1	1	0
ISIC_5147292		1	Malignant	Malignant	Malignant	1	0	1
ISIC_5272223		1	Malignant	Benign	Benign	1	1	0
ISIC_5315062		1	Malignant	Benign	Benign	1	1	0
ISIC_5365617		1	Malignant	Malignant	Malignant	1	0	1
ISIC_5391758		1	Malignant	Benign	Benign	1	1	0
ISIC_5415761		1	Malignant	Benign	Benign	1	1	0
ISIC_5495413		1	Malignant	Malignant	Malignant	1	0	1
ISIC_5667461		1	Malignant	Benign	Benign	1	1	0
ISIC_5714411		1	Malignant	Malignant	Malignant	1	0	1
ISIC_5732201		1	Malignant	Benign	Benign	1	1	0
ISIC_5747486		1	Malignant	Benign	Benign	1	1	0
ISIC_5747942		1	Malignant	Malignant	Malignant	1	0	1
ISIC_5922588		1	Malignant	Malignant	Malignant	1	0	1
ISIC_6024335		1	Malignant	Malignant	Malignant	1	0	1
ISIC_6056121		1	Malignant	Benign	Benign	1	1	0
ISIC_6220625		1	Malignant	Malignant	Malignant	1	0	1
ISIC_6285925		1	Malignant	Benign	Benign	1	1	0
ISIC_6313487		1	Malignant	Malignant	Malignant	1	0	1
ISIC_6348638		1	Malignant	Malignant	Malignant	1	0	1
ISIC_6398283		1	Malignant	Malignant	Malignant	1	0	1
ISIC_6398669		1	Malignant	Malignant	Malignant	1	0	1
ISIC_6613150		1	Malignant	Malignant	Malignant	1	0	1
ISIC_6620377		1	Malignant	Benign	Benign	1	1	0
ISIC_6625102		1	Malignant	Benign	Benign	1	1	0
ISIC_6688417		1	Malignant	Benign	Benign	1	1	0
ISIC_6713432		1	Malignant	Malignant	Malignant	1	0	1
ISIC_6714082		1	Malignant	Benign	Benign	1	1	0
ISIC_6767569		1	Malignant	Benign	Benign	1	1	0
ISIC_6784593		1	Malignant	Benign	Benign	1	1	0
ISIC_6809586		1	Malignant	Malignant	Malignant	1	0	1
ISIC_6945634		1	Malignant	Malignant	Malignant	1	0	1
ISIC_6982386		1	Malignant	Malignant	Malignant	1	0	1
ISIC_7035246		1	Malignant	Malignant	Malignant	1	0	1
ISIC_7079349		1	Malignant	Malignant	Malignant	1	0	1
ISIC_7100755		1	Malignant	Malignant	Malignant	1	0	1
ISIC_7101732		1	Malignant	Malignant	Malignant	1	0	1
ISIC_7130929		1	Malignant	Malignant	Malignant	1	0	1
ISIC_7205745		1	Malignant	Benign	Benign	1	1	0
ISIC_7233368		1	Malignant	Malignant	Malignant	1	0	1
ISIC_7253401		1	Malignant	Malignant	Malignant	1	0	1
ISIC_7295035		1	Malignant	Benign	Benign	1	1	0
ISIC_7577395		1	Malignant	Malignant	Malignant	1	0	1
ISIC_7612992		1	Malignant	Benign	Benign	1	1	0
ISIC_7626256		1	Malignant	Malignant	Malignant	1	0	1
ISIC_7658729		1	Malignant	Malignant	Malignant	1	0	1
ISIC_7693611		1	Malignant	Malignant	Malignant	1	0	1
ISIC_7788318		1	Malignant	Malignant	Malignant	1	0	1
ISIC_7872595		1	Malignant	Malignant	Malignant	1	0	1
ISIC_7927525		1	Malignant	Benign	Benign	1	1	0
ISIC_7960321		1	Malignant	Malignant	Malignant	1	0	1
ISIC_8002875		1	Malignant	Malignant	Malignant	1	0	1
ISIC_8027899		1	Malignant	Malignant	Malignant	1	0	1
ISIC_8106899		1	Malignant	Malignant	Malignant	1	0	1
ISIC_8167374		1	Malignant	Malignant	Malignant	1	0	1
ISIC_8175453		1	Malignant	Malignant	Malignant	1	0	1
ISIC_8207974		1	Malignant	Benign	Benign	1	1	0
ISIC_8281208		1	Malignant	Malignant	Malignant	1	0	1
ISIC_8325226		1	Malignant	Malignant	Malignant	1	0	1
ISIC_8437493		1	Malignant	Malignant	Malignant	1	0	1
ISIC_8485716		1	Malignant	Benign	Benign	1	1	0
ISIC_8838753		1	Malignant	Benign	Benign	1	1	0
ISIC_8892236		1	Malignant	Benign	Benign	1	1	0
ISIC_9000234		1	Malignant	Benign	Benign	1	1	0
ISIC_9048507		1	Malignant	Malignant	Malignant	1	0	1
ISIC_9130157		1	Malignant	Benign	Benign	1	1	0
ISIC_9164054		1	Malignant	Malignant	Malignant	1	0	1
ISIC_9210255		1	Malignant	Malignant	Malignant	1	0	1
ISIC_9685931		1	Malignant	Benign	Benign	1	1	0
ISIC_9754098		1	Malignant	Malignant	Malignant	1	0	1
ISIC_9770677		1	Malignant	Benign	Benign	1	1	0
ISIC_9900191		1	Malignant	Malignant	Malignant	1	0	1
						91	35	56

## Sheet: Mali_1_alexnet_densenet
		Activation Maps Consensus		Network 1	Network 2
Filename	Immagine	Gradcam-Consensus	True_Label	Net1_Prediction	Net2_Prediction	Predict_Consensus	Penalty	Trustworthiness
ISIC_3301933		0.661508	Malignant	Malignant	Malignant	1	0	0.661508
ISIC_3319229		0.427715	Malignant	Benign	Benign	1	1	-0.572285
ISIC_3338629		0.397516	Malignant	Malignant	Malignant	1	0	0.397516
ISIC_3464344		0.298083	Malignant	Benign	Malignant	0	1	-0.701917
ISIC_3475660		0.218067	Malignant	Malignant	Malignant	1	0	0.218067
ISIC_3733653		0.321006	Malignant	Malignant	Malignant	1	0	0.321006
ISIC_3775417		0.120744	Malignant	Benign	Malignant	0	1	-0.879256
ISIC_3824206		0.30265	Malignant	Benign	Benign	1	1	-0.69735
ISIC_3944634		0.014036	Malignant	Malignant	Malignant	1	0	0.014036
ISIC_3963183		0.443667	Malignant	Malignant	Malignant	1	0	0.443667
ISIC_3996796		0.351327	Malignant	Benign	Malignant	0	1	-0.648673
ISIC_4377208		0.636921	Malignant	Malignant	Malignant	1	0	0.636921
ISIC_4378189		0.408967	Malignant	Malignant	Malignant	1	0	0.408967
ISIC_4425322		0.591948	Malignant	Malignant	Malignant	1	0	0.591948
ISIC_4584265		0.441887	Malignant	Malignant	Malignant	1	0	0.441887
ISIC_4653503		0.482301	Malignant	Benign	Benign	1	1	-0.517699
ISIC_4874581		0.138321	Malignant	Benign	Benign	1	1	-0.861679
ISIC_4936662		0.013256	Malignant	Malignant	Benign	0	1	-0.986744
ISIC_4938994		0.461402	Malignant	Malignant	Benign	0	1	-0.538598
ISIC_5046082		0.649193	Malignant	Benign	Benign	1	1	-0.350807
ISIC_5147292		0.691465	Malignant	Malignant	Malignant	1	0	0.691465
ISIC_5272223		0.693197	Malignant	Benign	Benign	1	1	-0.306803
ISIC_5315062		0.337936	Malignant	Benign	Malignant	0	1	-0.662064
ISIC_5365617		0.743362	Malignant	Malignant	Malignant	1	0	0.743362
ISIC_5391758		0.173136	Malignant	Benign	Benign	1	1	-0.826864
ISIC_5415761		0	Malignant	Benign	Malignant	0	1	-1
ISIC_5495413		0.189575	Malignant	Malignant	Benign	0	1	-0.810425
ISIC_5667461		0.277275	Malignant	Benign	Benign	1	1	-0.722725
ISIC_5714411		0.392046	Malignant	Malignant	Malignant	1	0	0.392046
ISIC_5732201		0.64455	Malignant	Benign	Benign	1	1	-0.35545
ISIC_5747486		0	Malignant	Benign	Malignant	0	1	-1
ISIC_5747942		0.464579	Malignant	Malignant	Malignant	1	0	0.464579
ISIC_5922588		0.310202	Malignant	Malignant	Malignant	1	0	0.310202
ISIC_6024335		0.363887	Malignant	Malignant	Malignant	1	0	0.363887
ISIC_6056121		0.52779	Malignant	Benign	Benign	1	1	-0.47221
ISIC_6220625		0.240586	Malignant	Malignant	Malignant	1	0	0.240586
ISIC_6285925		0.447371	Malignant	Benign	Benign	1	1	-0.552629
ISIC_6313487		0.27145	Malignant	Malignant	Malignant	1	0	0.27145
ISIC_6348638		0.812142	Malignant	Malignant	Malignant	1	0	0.812142
ISIC_6398283		0.092246	Malignant	Malignant	Malignant	1	0	0.092246
ISIC_6398669		0.801475	Malignant	Malignant	Malignant	1	0	0.801475
ISIC_6613150		0.911641	Malignant	Malignant	Malignant	1	0	0.911641
ISIC_6620377		0	Malignant	Benign	Benign	1	1	-1
ISIC_6625102		0.233273	Malignant	Benign	Malignant	0	1	-0.766727
ISIC_6688417		0.612602	Malignant	Benign	Benign	1	1	-0.387398
ISIC_6713432		0.151995	Malignant	Malignant	Benign	0	1	-0.848005
ISIC_6714082		0.3507	Malignant	Benign	Benign	1	1	-0.6493
ISIC_6767569		0.567769	Malignant	Benign	Benign	1	1	-0.432231
ISIC_6784593		0.203419	Malignant	Benign	Benign	1	1	-0.796581
ISIC_6809586		0.19325	Malignant	Malignant	Malignant	1	0	0.19325
ISIC_6945634		0.404869	Malignant	Malignant	Malignant	1	0	0.404869
ISIC_6982386		0.613504	Malignant	Malignant	Malignant	1	0	0.613504
ISIC_7035246		0.28595	Malignant	Malignant	Malignant	1	0	0.28595
ISIC_7079349		0.670952	Malignant	Malignant	Malignant	1	0	0.670952
ISIC_7100755		0.535327	Malignant	Malignant	Malignant	1	0	0.535327
ISIC_7101732		0.552756	Malignant	Malignant	Malignant	1	0	0.552756
ISIC_7130929		0.666803	Malignant	Malignant	Malignant	1	0	0.666803
ISIC_7205745		0.258912	Malignant	Benign	Benign	1	1	-0.741088
ISIC_7233368		0.583777	Malignant	Malignant	Malignant	1	0	0.583777
ISIC_7253401		0.484466	Malignant	Malignant	Malignant	1	0	0.484466
ISIC_7295035		0.362068	Malignant	Benign	Benign	1	1	-0.637932
ISIC_7577395		0.268386	Malignant	Malignant	Benign	0	1	-0.731614
ISIC_7612992		0.427596	Malignant	Benign	Benign	1	1	-0.572404
ISIC_7626256		0.624258	Malignant	Malignant	Malignant	1	0	0.624258
ISIC_7658729		0.221633	Malignant	Malignant	Malignant	1	0	0.221633
ISIC_7693611		0.501319	Malignant	Malignant	Malignant	1	0	0.501319
ISIC_7788318		0.16235	Malignant	Malignant	Malignant	1	0	0.16235
ISIC_7872595		0.464667	Malignant	Malignant	Malignant	1	0	0.464667
ISIC_7927525		0.493984	Malignant	Benign	Benign	1	1	-0.506016
ISIC_7960321		0.424694	Malignant	Malignant	Malignant	1	0	0.424694
ISIC_8002875		0.648199	Malignant	Malignant	Malignant	1	0	0.648199
ISIC_8027899		0.721776	Malignant	Malignant	Malignant	1	0	0.721776
ISIC_8106899		0.767867	Malignant	Malignant	Malignant	1	0	0.767867
ISIC_8167374		0.269696	Malignant	Malignant	Benign	0	1	-0.730304
ISIC_8175453		0.579461	Malignant	Malignant	Malignant	1	0	0.579461
ISIC_8207974		0.530978	Malignant	Benign	Benign	1	1	-0.469022
ISIC_8281208		0.557176	Malignant	Malignant	Malignant	1	0	0.557176
ISIC_8325226		0.724247	Malignant	Malignant	Malignant	1	0	0.724247
ISIC_8437493		0.423747	Malignant	Malignant	Malignant	1	0	0.423747
ISIC_8485716		0.128088	Malignant	Benign	Malignant	0	1	-0.871912
ISIC_8838753		0.484145	Malignant	Benign	Benign	1	1	-0.515855
ISIC_8892236		0.293149	Malignant	Benign	Benign	1	1	-0.706851
ISIC_9000234		0.509057	Malignant	Benign	Benign	1	1	-0.490943
ISIC_9048507		0.037312	Malignant	Malignant	Benign	0	1	-0.962688
ISIC_9130157		0.49579	Malignant	Benign	Benign	1	1	-0.50421
ISIC_9164054		0.477624	Malignant	Malignant	Malignant	1	0	0.477624
ISIC_9210255		0.724078	Malignant	Malignant	Malignant	1	0	0.724078
ISIC_9685931		0.552088	Malignant	Benign	Benign	1	1	-0.447912
ISIC_9754098		0.674881	Malignant	Malignant	Malignant	1	0	0.674881
ISIC_9770677		0.346343	Malignant	Benign	Benign	1	1	-0.653657
ISIC_9900191		0	Malignant	Malignant	Benign	0	1	-1
						75	43	-4.96659

## Sheet: Mali_1_alexnet_efficientnetb0
		Activation Maps Consensus		Network 1	Network 2
Filename	Immagine	Gradcam-Consensus	True_Label	Net1_Prediction	Net2_Prediction	Predict_Consensus	Penalty	Trustworthiness
ISIC_3301933		0.648243	Malignant	Malignant	Malignant	1	0	0.648243
ISIC_3319229		0.249544	Malignant	Benign	Malignant	0	1	-0.750456
ISIC_3338629		0.475098	Malignant	Malignant	Malignant	1	0	0.475098
ISIC_3464344		0.29918	Malignant	Benign	Malignant	0	1	-0.70082
ISIC_3475660		0.185278	Malignant	Malignant	Malignant	1	0	0.185278
ISIC_3733653		0.433336	Malignant	Malignant	Malignant	1	0	0.433336
ISIC_3775417		0.141285	Malignant	Benign	Malignant	0	1	-0.858715
ISIC_3824206		0.295337	Malignant	Benign	Benign	1	1	-0.704663
ISIC_3944634		0.244996	Malignant	Malignant	Malignant	1	0	0.244996
ISIC_3963183		0.348923	Malignant	Malignant	Malignant	1	0	0.348923
ISIC_3996796		0.382916	Malignant	Benign	Malignant	0	1	-0.617084
ISIC_4377208		0.682028	Malignant	Malignant	Malignant	1	0	0.682028
ISIC_4378189		0.184143	Malignant	Malignant	Malignant	1	0	0.184143
ISIC_4425322		0.304413	Malignant	Malignant	Malignant	1	0	0.304413
ISIC_4584265		0.409399	Malignant	Malignant	Malignant	1	0	0.409399
ISIC_4653503		0	Malignant	Benign	Benign	1	1	-1
ISIC_4874581		0	Malignant	Benign	Benign	1	1	-1
ISIC_4936662		0.241144	Malignant	Malignant	Malignant	1	0	0.241144
ISIC_4938994		0.369731	Malignant	Malignant	Benign	0	1	-0.630269
ISIC_5046082		0.790295	Malignant	Benign	Benign	1	1	-0.209705
ISIC_5147292		0.50625	Malignant	Malignant	Benign	0	1	-0.49375
ISIC_5272223		0.521909	Malignant	Benign	Benign	1	1	-0.478091
ISIC_5315062		0.503195	Malignant	Benign	Benign	1	1	-0.496805
ISIC_5365617		0.748789	Malignant	Malignant	Malignant	1	0	0.748789
ISIC_5391758		0	Malignant	Benign	Benign	1	1	-1
ISIC_5415761		0.281283	Malignant	Benign	Benign	1	1	-0.718717
ISIC_5495413		0.435876	Malignant	Malignant	Malignant	1	0	0.435876
ISIC_5667461		0.232586	Malignant	Benign	Malignant	0	1	-0.767414
ISIC_5714411		0.429352	Malignant	Malignant	Malignant	1	0	0.429352
ISIC_5732201		0.490727	Malignant	Benign	Malignant	0	1	-0.509273
ISIC_5747486		0.11194	Malignant	Benign	Benign	1	1	-0.88806
ISIC_5747942		0.642455	Malignant	Malignant	Malignant	1	0	0.642455
ISIC_5922588		0.164297	Malignant	Malignant	Malignant	1	0	0.164297
ISIC_6024335		0.450015	Malignant	Malignant	Malignant	1	0	0.450015
ISIC_6056121		0.580348	Malignant	Benign	Benign	1	1	-0.419652
ISIC_6220625		0.344686	Malignant	Malignant	Malignant	1	0	0.344686
ISIC_6285925		0	Malignant	Benign	Benign	1	1	-1
ISIC_6313487		0.245865	Malignant	Malignant	Malignant	1	0	0.245865
ISIC_6348638		0.652075	Malignant	Malignant	Malignant	1	0	0.652075
ISIC_6398283		0.106812	Malignant	Malignant	Malignant	1	0	0.106812
ISIC_6398669		0.532395	Malignant	Malignant	Benign	0	1	-0.467605
ISIC_6613150		0.818235	Malignant	Malignant	Malignant	1	0	0.818235
ISIC_6620377		0	Malignant	Benign	Malignant	0	1	-1
ISIC_6625102		0.472765	Malignant	Benign	Benign	1	1	-0.527235
ISIC_6688417		0.164711	Malignant	Benign	Benign	1	1	-0.835289
ISIC_6713432		0.636657	Malignant	Malignant	Malignant	1	0	0.636657
ISIC_6714082		0	Malignant	Benign	Malignant	0	1	-1
ISIC_6767569		0.071955	Malignant	Benign	Malignant	0	1	-0.928045
ISIC_6784593		0.106919	Malignant	Benign	Benign	1	1	-0.893081
ISIC_6809586		0.131302	Malignant	Malignant	Malignant	1	0	0.131302
ISIC_6945634		0.37279	Malignant	Malignant	Malignant	1	0	0.37279
ISIC_6982386		0.535347	Malignant	Malignant	Malignant	1	0	0.535347
ISIC_7035246		0.157808	Malignant	Malignant	Malignant	1	0	0.157808
ISIC_7079349		0.572468	Malignant	Malignant	Malignant	1	0	0.572468
ISIC_7100755		0.378928	Malignant	Malignant	Malignant	1	0	0.378928
ISIC_7101732		0.582084	Malignant	Malignant	Malignant	1	0	0.582084
ISIC_7130929		0.470171	Malignant	Malignant	Malignant	1	0	0.470171
ISIC_7205745		0	Malignant	Benign	Benign	1	1	-1
ISIC_7233368		0.535872	Malignant	Malignant	Benign	0	1	-0.464128
ISIC_7253401		0.4196	Malignant	Malignant	Malignant	1	0	0.4196
ISIC_7295035		0.188467	Malignant	Benign	Benign	1	1	-0.811533
ISIC_7577395		0.535079	Malignant	Malignant	Benign	0	1	-0.464921
ISIC_7612992		0.481104	Malignant	Benign	Benign	1	1	-0.518896
ISIC_7626256		0.582424	Malignant	Malignant	Malignant	1	0	0.582424
ISIC_7658729		0.123441	Malignant	Malignant	Benign	0	1	-0.876559
ISIC_7693611		0.407839	Malignant	Malignant	Malignant	1	0	0.407839
ISIC_7788318		0.200184	Malignant	Malignant	Malignant	1	0	0.200184
ISIC_7872595		0.770562	Malignant	Malignant	Malignant	1	0	0.770562
ISIC_7927525		0.076847	Malignant	Benign	Malignant	0	1	-0.923153
ISIC_7960321		0.239145	Malignant	Malignant	Malignant	1	0	0.239145
ISIC_8002875		0.540816	Malignant	Malignant	Malignant	1	0	0.540816
ISIC_8027899		0.575365	Malignant	Malignant	Malignant	1	0	0.575365
ISIC_8106899		0.77415	Malignant	Malignant	Malignant	1	0	0.77415
ISIC_8167374		0.493108	Malignant	Malignant	Malignant	1	0	0.493108
ISIC_8175453		0.416882	Malignant	Malignant	Malignant	1	0	0.416882
ISIC_8207974		0.296601	Malignant	Benign	Benign	1	1	-0.703399
ISIC_8281208		0.22834	Malignant	Malignant	Malignant	1	0	0.22834
ISIC_8325226		0.557435	Malignant	Malignant	Malignant	1	0	0.557435
ISIC_8437493		0.363155	Malignant	Malignant	Malignant	1	0	0.363155
ISIC_8485716		0.218241	Malignant	Benign	Benign	1	1	-0.781759
ISIC_8838753		0.062561	Malignant	Benign	Malignant	0	1	-0.937439
ISIC_8892236		0.108541	Malignant	Benign	Malignant	0	1	-0.891459
ISIC_9000234		0.398281	Malignant	Benign	Benign	1	1	-0.601719
ISIC_9048507		0.039979	Malignant	Malignant	Malignant	1	0	0.039979
ISIC_9130157		0.126124	Malignant	Benign	Benign	1	1	-0.873876
ISIC_9164054		0.547983	Malignant	Malignant	Malignant	1	0	0.547983
ISIC_9210255		0.682926	Malignant	Malignant	Malignant	1	0	0.682926
ISIC_9685931		0.130629	Malignant	Benign	Malignant	0	1	-0.869371
ISIC_9754098		0.428965	Malignant	Malignant	Malignant	1	0	0.428965
ISIC_9770677		0	Malignant	Benign	Benign	1	1	-1
ISIC_9900191		0.581956	Malignant	Malignant	Malignant	1	0	0.581956
						72	41	-8.72911

## Sheet: Mali_1_alexnet_googlenet
		Activation Maps Consensus		Network 1	Network 2
Filename	Immagine	Gradcam-Consensus	True_Label	Net1_Prediction	Net2_Prediction	Predict_Consensus	Penalty	Trustworthiness
ISIC_3301933		0.552092	Malignant	Malignant	Malignant	1	0	0.552092
ISIC_3319229		0.520417	Malignant	Benign	Benign	1	1	-0.479583
ISIC_3338629		0.367656	Malignant	Malignant	Malignant	1	0	0.367656
ISIC_3464344		0	Malignant	Benign	Malignant	0	1	-1
ISIC_3475660		0.564882	Malignant	Malignant	Malignant	1	0	0.564882
ISIC_3733653		0.452251	Malignant	Malignant	Malignant	1	0	0.452251
ISIC_3775417		0.033832	Malignant	Benign	Malignant	0	1	-0.966168
ISIC_3824206		0.524145	Malignant	Benign	Benign	1	1	-0.475855
ISIC_3944634		0.435619	Malignant	Malignant	Malignant	1	0	0.435619
ISIC_3963183		0.144701	Malignant	Malignant	Malignant	1	0	0.144701
ISIC_3996796		0.043191	Malignant	Benign	Malignant	0	1	-0.956809
ISIC_4377208		0.297856	Malignant	Malignant	Malignant	1	0	0.297856
ISIC_4378189		0.365876	Malignant	Malignant	Malignant	1	0	0.365876
ISIC_4425322		0.363594	Malignant	Malignant	Malignant	1	0	0.363594
ISIC_4584265		0.427758	Malignant	Malignant	Malignant	1	0	0.427758
ISIC_4653503		0.175562	Malignant	Benign	Benign	1	1	-0.824438
ISIC_4874581		0.446622	Malignant	Benign	Benign	1	1	-0.553378
ISIC_4936662		0.737092	Malignant	Malignant	Malignant	1	0	0.737092
ISIC_4938994		0.317918	Malignant	Malignant	Malignant	1	0	0.317918
ISIC_5046082		0.410968	Malignant	Benign	Malignant	0	1	-0.589032
ISIC_5147292		0.537188	Malignant	Malignant	Malignant	1	0	0.537188
ISIC_5272223		0.349376	Malignant	Benign	Benign	1	1	-0.650624
ISIC_5315062		0.082622	Malignant	Benign	Malignant	0	1	-0.917378
ISIC_5365617		0.310782	Malignant	Malignant	Malignant	1	0	0.310782
ISIC_5391758		0.11889	Malignant	Benign	Malignant	0	1	-0.88111
ISIC_5415761		0	Malignant	Benign	Malignant	0	1	-1
ISIC_5495413		0.148689	Malignant	Malignant	Malignant	1	0	0.148689
ISIC_5667461		0.197587	Malignant	Benign	Benign	1	1	-0.802413
ISIC_5714411		0.650062	Malignant	Malignant	Malignant	1	0	0.650062
ISIC_5732201		0.166237	Malignant	Benign	Malignant	0	1	-0.833763
ISIC_5747486		0	Malignant	Benign	Malignant	0	1	-1
ISIC_5747942		0.399935	Malignant	Malignant	Malignant	1	0	0.399935
ISIC_5922588		0.466855	Malignant	Malignant	Malignant	1	0	0.466855
ISIC_6024335		0.504992	Malignant	Malignant	Malignant	1	0	0.504992
ISIC_6056121		0.105913	Malignant	Benign	Malignant	0	1	-0.894087
ISIC_6220625		0.478192	Malignant	Malignant	Malignant	1	0	0.478192
ISIC_6285925		0	Malignant	Benign	Malignant	0	1	-1
ISIC_6313487		0.637738	Malignant	Malignant	Malignant	1	0	0.637738
ISIC_6348638		0.419331	Malignant	Malignant	Malignant	1	0	0.419331
ISIC_6398283		0.550778	Malignant	Malignant	Malignant	1	0	0.550778
ISIC_6398669		0.251253	Malignant	Malignant	Malignant	1	0	0.251253
ISIC_6613150		0.498442	Malignant	Malignant	Malignant	1	0	0.498442
ISIC_6620377		0.208348	Malignant	Benign	Benign	1	1	-0.791652
ISIC_6625102		0	Malignant	Benign	Malignant	0	1	-1
ISIC_6688417		0.441656	Malignant	Benign	Benign	1	1	-0.558344
ISIC_6713432		0.28908	Malignant	Malignant	Malignant	1	0	0.28908
ISIC_6714082		0.492719	Malignant	Benign	Benign	1	1	-0.507281
ISIC_6767569		0	Malignant	Benign	Malignant	0	1	-1
ISIC_6784593		0.221662	Malignant	Benign	Benign	1	1	-0.778338
ISIC_6809586		0.353155	Malignant	Malignant	Malignant	1	0	0.353155
ISIC_6945634		0.640432	Malignant	Malignant	Malignant	1	0	0.640432
ISIC_6982386		0.401073	Malignant	Malignant	Malignant	1	0	0.401073
ISIC_7035246		0.396612	Malignant	Malignant	Malignant	1	0	0.396612
ISIC_7079349		0.412808	Malignant	Malignant	Malignant	1	0	0.412808
ISIC_7100755		0.434286	Malignant	Malignant	Malignant	1	0	0.434286
ISIC_7101732		0.559219	Malignant	Malignant	Malignant	1	0	0.559219
ISIC_7130929		0.281751	Malignant	Malignant	Malignant	1	0	0.281751
ISIC_7205745		0.411679	Malignant	Benign	Benign	1	1	-0.588321
ISIC_7233368		0.58769	Malignant	Malignant	Malignant	1	0	0.58769
ISIC_7253401		0.254809	Malignant	Malignant	Malignant	1	0	0.254809
ISIC_7295035		0.592906	Malignant	Benign	Benign	1	1	-0.407094
ISIC_7577395		0.448061	Malignant	Malignant	Malignant	1	0	0.448061
ISIC_7612992		0.607764	Malignant	Benign	Benign	1	1	-0.392236
ISIC_7626256		0.345739	Malignant	Malignant	Malignant	1	0	0.345739
ISIC_7658729		0.325214	Malignant	Malignant	Malignant	1	0	0.325214
ISIC_7693611		0.475231	Malignant	Malignant	Malignant	1	0	0.475231
ISIC_7788318		0.417472	Malignant	Malignant	Malignant	1	0	0.417472
ISIC_7872595		0.048964	Malignant	Malignant	Malignant	1	0	0.048964
ISIC_7927525		0.583572	Malignant	Benign	Benign	1	1	-0.416428
ISIC_7960321		0.585776	Malignant	Malignant	Malignant	1	0	0.585776
ISIC_8002875		0.176103	Malignant	Malignant	Malignant	1	0	0.176103
ISIC_8027899		0.539705	Malignant	Malignant	Malignant	1	0	0.539705
ISIC_8106899		0.30168	Malignant	Malignant	Malignant	1	0	0.30168
ISIC_8167374		0.389233	Malignant	Malignant	Malignant	1	0	0.389233
ISIC_8175453		0.31431	Malignant	Malignant	Malignant	1	0	0.31431
ISIC_8207974		0.299394	Malignant	Benign	Benign	1	1	-0.700606
ISIC_8281208		0.366788	Malignant	Malignant	Malignant	1	0	0.366788
ISIC_8325226		0.289947	Malignant	Malignant	Malignant	1	0	0.289947
ISIC_8437493		0.508266	Malignant	Malignant	Malignant	1	0	0.508266
ISIC_8485716		0.029093	Malignant	Benign	Malignant	0	1	-0.970907
ISIC_8838753		0.056126	Malignant	Benign	Benign	1	1	-0.943874
ISIC_8892236		0.068205	Malignant	Benign	Benign	1	1	-0.931795
ISIC_9000234		0.184231	Malignant	Benign	Benign	1	1	-0.815769
ISIC_9048507		0.428568	Malignant	Malignant	Malignant	1	0	0.428568
ISIC_9130157		0.347771	Malignant	Benign	Benign	1	1	-0.652229
ISIC_9164054		0.282299	Malignant	Malignant	Malignant	1	0	0.282299
ISIC_9210255		0.52149	Malignant	Malignant	Malignant	1	0	0.52149
ISIC_9685931		0.037702	Malignant	Benign	Malignant	0	1	-0.962298
ISIC_9754098		0.457382	Malignant	Malignant	Malignant	1	0	0.457382
ISIC_9770677		0.389855	Malignant	Benign	Benign	1	1	-0.610145
ISIC_9900191		0.400546	Malignant	Malignant	Malignant	1	0	0.400546
						76	35	-3.73673

## Sheet: Mali_1_alexnet_inceptionresnetv
		Activation Maps Consensus		Network 1	Network 2
Filename	Immagine	Gradcam-Consensus	True_Label	Net1_Prediction	Net2_Prediction	Predict_Consensus	Penalty	Trustworthiness
ISIC_3301933		0.649666	Malignant	Malignant	Malignant	1	0	0.649666
ISIC_3319229		0.34589	Malignant	Benign	Benign	1	1	-0.65411
ISIC_3338629		0.573176	Malignant	Malignant	Malignant	1	0	0.573176
ISIC_3464344		0.604973	Malignant	Benign	Benign	1	1	-0.395027
ISIC_3475660		0.304183	Malignant	Malignant	Malignant	1	0	0.304183
ISIC_3733653		0.503466	Malignant	Malignant	Malignant	1	0	0.503466
ISIC_3775417		0.08972	Malignant	Benign	Malignant	0	1	-0.91028
ISIC_3824206		0.403829	Malignant	Benign	Benign	1	1	-0.596171
ISIC_3944634		0.135145	Malignant	Malignant	Malignant	1	0	0.135145
ISIC_3963183		0.327364	Malignant	Malignant	Malignant	1	0	0.327364
ISIC_3996796		0.357239	Malignant	Benign	Benign	1	1	-0.642761
ISIC_4377208		0.592375	Malignant	Malignant	Benign	0	1	-0.407625
ISIC_4378189		0.406449	Malignant	Malignant	Malignant	1	0	0.406449
ISIC_4425322		0.428535	Malignant	Malignant	Malignant	1	0	0.428535
ISIC_4584265		0.544516	Malignant	Malignant	Malignant	1	0	0.544516
ISIC_4653503		0.216347	Malignant	Benign	Benign	1	1	-0.783653
ISIC_4874581		0.377647	Malignant	Benign	Benign	1	1	-0.622353
ISIC_4936662		0.376805	Malignant	Malignant	Malignant	1	0	0.376805
ISIC_4938994		0.656631	Malignant	Malignant	Malignant	1	0	0.656631
ISIC_5046082		0.534879	Malignant	Benign	Benign	1	1	-0.465121
ISIC_5147292		0.600533	Malignant	Malignant	Benign	0	1	-0.399467
ISIC_5272223		0.517089	Malignant	Benign	Malignant	0	1	-0.482911
ISIC_5315062		0.56675	Malignant	Benign	Benign	1	1	-0.43325
ISIC_5365617		0.651564	Malignant	Malignant	Malignant	1	0	0.651564
ISIC_5391758		0.141895	Malignant	Benign	Benign	1	1	-0.858105
ISIC_5415761		0.083196	Malignant	Benign	Malignant	0	1	-0.916804
ISIC_5495413		0.666976	Malignant	Malignant	Malignant	1	0	0.666976
ISIC_5667461		0.291338	Malignant	Benign	Benign	1	1	-0.708662
ISIC_5714411		0.512019	Malignant	Malignant	Malignant	1	0	0.512019
ISIC_5732201		0.472718	Malignant	Benign	Malignant	0	1	-0.527282
ISIC_5747486		0.159938	Malignant	Benign	Malignant	0	1	-0.840062
ISIC_5747942		0.242889	Malignant	Malignant	Malignant	1	0	0.242889
ISIC_5922588		0.415238	Malignant	Malignant	Malignant	1	0	0.415238
ISIC_6024335		0.25029	Malignant	Malignant	Malignant	1	0	0.25029
ISIC_6056121		0.563305	Malignant	Benign	Benign	1	1	-0.436695
ISIC_6220625		0.208921	Malignant	Malignant	Malignant	1	0	0.208921
ISIC_6285925		0.370411	Malignant	Benign	Benign	1	1	-0.629589
ISIC_6313487		0.263757	Malignant	Malignant	Malignant	1	0	0.263757
ISIC_6348638		0.0825	Malignant	Malignant	Malignant	1	0	0.0825
ISIC_6398283		0.316242	Malignant	Malignant	Malignant	1	0	0.316242
ISIC_6398669		0.740597	Malignant	Malignant	Malignant	1	0	0.740597
ISIC_6613150		0.635978	Malignant	Malignant	Benign	0	1	-0.364022
ISIC_6620377		0.113037	Malignant	Benign	Benign	1	1	-0.886963
ISIC_6625102		0.114936	Malignant	Benign	Malignant	0	1	-0.885064
ISIC_6688417		0.052873	Malignant	Benign	Malignant	0	1	-0.947127
ISIC_6713432		0.601455	Malignant	Malignant	Malignant	1	0	0.601455
ISIC_6714082		0.533108	Malignant	Benign	Benign	1	1	-0.466892
ISIC_6767569		0	Malignant	Benign	Malignant	0	1	-1
ISIC_6784593		0.376442	Malignant	Benign	Benign	1	1	-0.623558
ISIC_6809586		0	Malignant	Malignant	Malignant	1	0	0
ISIC_6945634		0.396194	Malignant	Malignant	Malignant	1	0	0.396194
ISIC_6982386		0.1596	Malignant	Malignant	Benign	0	1	-0.8404
ISIC_7035246		0.153693	Malignant	Malignant	Malignant	1	0	0.153693
ISIC_7079349		0.564388	Malignant	Malignant	Malignant	1	0	0.564388
ISIC_7100755		0.620886	Malignant	Malignant	Malignant	1	0	0.620886
ISIC_7101732		0.423058	Malignant	Malignant	Malignant	1	0	0.423058
ISIC_7130929		0.529006	Malignant	Malignant	Malignant	1	0	0.529006
ISIC_7205745		0.254177	Malignant	Benign	Benign	1	1	-0.745823
ISIC_7233368		0.296073	Malignant	Malignant	Malignant	1	0	0.296073
ISIC_7253401		0.355714	Malignant	Malignant	Malignant	1	0	0.355714
ISIC_7295035		0.406379	Malignant	Benign	Benign	1	1	-0.593621
ISIC_7577395		0.461585	Malignant	Malignant	Malignant	1	0	0.461585
ISIC_7612992		0.472784	Malignant	Benign	Malignant	0	1	-0.527216
ISIC_7626256		0.514764	Malignant	Malignant	Malignant	1	0	0.514764
ISIC_7658729		0.331027	Malignant	Malignant	Malignant	1	0	0.331027
ISIC_7693611		0.379329	Malignant	Malignant	Malignant	1	0	0.379329
ISIC_7788318		0.180365	Malignant	Malignant	Malignant	1	0	0.180365
ISIC_7872595		0.382323	Malignant	Malignant	Malignant	1	0	0.382323
ISIC_7927525		0.51797	Malignant	Benign	Benign	1	1	-0.48203
ISIC_7960321		0.438367	Malignant	Malignant	Malignant	1	0	0.438367
ISIC_8002875		0.54284	Malignant	Malignant	Malignant	1	0	0.54284
ISIC_8027899		0.652227	Malignant	Malignant	Malignant	1	0	0.652227
ISIC_8106899		0.716544	Malignant	Malignant	Malignant	1	0	0.716544
ISIC_8167374		0.366119	Malignant	Malignant	Malignant	1	0	0.366119
ISIC_8175453		0.367102	Malignant	Malignant	Malignant	1	0	0.367102
ISIC_8207974		0.445594	Malignant	Benign	Benign	1	1	-0.554406
ISIC_8281208		0.440373	Malignant	Malignant	Malignant	1	0	0.440373
ISIC_8325226		0.507863	Malignant	Malignant	Malignant	1	0	0.507863
ISIC_8437493		0.169162	Malignant	Malignant	Malignant	1	0	0.169162
ISIC_8485716		0.129053	Malignant	Benign	Malignant	0	1	-0.870947
ISIC_8838753		0.443969	Malignant	Benign	Benign	1	1	-0.556031
ISIC_8892236		0.182057	Malignant	Benign	Benign	1	1	-0.817943
ISIC_9000234		0.342948	Malignant	Benign	Benign	1	1	-0.657052
ISIC_9048507		0.111695	Malignant	Malignant	Malignant	1	0	0.111695
ISIC_9130157		0.304656	Malignant	Benign	Benign	1	1	-0.695344
ISIC_9164054		0.418301	Malignant	Malignant	Malignant	1	0	0.418301
ISIC_9210255		0.666831	Malignant	Malignant	Malignant	1	0	0.666831
ISIC_9685931		0.560838	Malignant	Benign	Benign	1	1	-0.439162
ISIC_9754098		0.547986	Malignant	Malignant	Malignant	1	0	0.547986
ISIC_9770677		0.221872	Malignant	Benign	Benign	1	1	-0.778128
ISIC_9900191		0.651703	Malignant	Malignant	Malignant	1	0	0.651703
						77	39	-3.39776

## Sheet: Mali_1_alexnet_inceptionv3
		Activation Maps Consensus		Network 1	Network 2
Filename	Immagine	Gradcam-Consensus	True_Label	Net1_Prediction	Net2_Prediction	Predict_Consensus	Penalty	Trustworthiness
ISIC_3301933		0.77524	Malignant	Malignant	Malignant	1	0	0.77524
ISIC_3319229		0.578848	Malignant	Benign	Benign	1	1	-0.421152
ISIC_3338629		0.203421	Malignant	Malignant	Malignant	1	0	0.203421
ISIC_3464344		0.255368	Malignant	Benign	Benign	1	1	-0.744632
ISIC_3475660		0.548801	Malignant	Malignant	Malignant	1	0	0.548801
ISIC_3733653		0.456105	Malignant	Malignant	Malignant	1	0	0.456105
ISIC_3775417		0.107455	Malignant	Benign	Benign	1	1	-0.892545
ISIC_3824206		0.462902	Malignant	Benign	Benign	1	1	-0.537098
ISIC_3944634		0.192414	Malignant	Malignant	Malignant	1	0	0.192414
ISIC_3963183		0.481112	Malignant	Malignant	Malignant	1	0	0.481112
ISIC_3996796		0.254805	Malignant	Benign	Malignant	0	1	-0.745195
ISIC_4377208		0.534391	Malignant	Malignant	Malignant	1	0	0.534391
ISIC_4378189		0.445031	Malignant	Malignant	Malignant	1	0	0.445031
ISIC_4425322		0.386233	Malignant	Malignant	Malignant	1	0	0.386233
ISIC_4584265		0.454588	Malignant	Malignant	Malignant	1	0	0.454588
ISIC_4653503		0.374777	Malignant	Benign	Benign	1	1	-0.625223
ISIC_4874581		0.451037	Malignant	Benign	Benign	1	1	-0.548963
ISIC_4936662		0.563705	Malignant	Malignant	Malignant	1	0	0.563705
ISIC_4938994		0.441451	Malignant	Malignant	Benign	0	1	-0.558549
ISIC_5046082		0.564133	Malignant	Benign	Malignant	0	1	-0.435867
ISIC_5147292		0.382779	Malignant	Malignant	Benign	0	1	-0.617221
ISIC_5272223		0.34392	Malignant	Benign	Benign	1	1	-0.65608
ISIC_5315062		0.263484	Malignant	Benign	Malignant	0	1	-0.736516
ISIC_5365617		0.225244	Malignant	Malignant	Malignant	1	0	0.225244
ISIC_5391758		0.084967	Malignant	Benign	Benign	1	1	-0.915033
ISIC_5415761		0.176752	Malignant	Benign	Malignant	0	1	-0.823248
ISIC_5495413		0.144539	Malignant	Malignant	Benign	0	1	-0.855461
ISIC_5667461		0.088778	Malignant	Benign	Benign	1	1	-0.911222
ISIC_5714411		0.64337	Malignant	Malignant	Malignant	1	0	0.64337
ISIC_5732201		0.55373	Malignant	Benign	Benign	1	1	-0.44627
ISIC_5747486		0.213418	Malignant	Benign	Benign	1	1	-0.786582
ISIC_5747942		0.377169	Malignant	Malignant	Benign	0	1	-0.622831
ISIC_5922588		0.380019	Malignant	Malignant	Malignant	1	0	0.380019
ISIC_6024335		0.360973	Malignant	Malignant	Malignant	1	0	0.360973
ISIC_6056121		0.495036	Malignant	Benign	Benign	1	1	-0.504964
ISIC_6220625		0.361038	Malignant	Malignant	Malignant	1	0	0.361038
ISIC_6285925		0.330095	Malignant	Benign	Benign	1	1	-0.669905
ISIC_6313487		0.147332	Malignant	Malignant	Malignant	1	0	0.147332
ISIC_6348638		0.771194	Malignant	Malignant	Malignant	1	0	0.771194
ISIC_6398283		0.445609	Malignant	Malignant	Malignant	1	0	0.445609
ISIC_6398669		0.361993	Malignant	Malignant	Malignant	1	0	0.361993
ISIC_6613150		0.668718	Malignant	Malignant	Malignant	1	0	0.668718
ISIC_6620377		0.354879	Malignant	Benign	Benign	1	1	-0.645121
ISIC_6625102		0.144635	Malignant	Benign	Malignant	0	1	-0.855365
ISIC_6688417		0.408103	Malignant	Benign	Benign	1	1	-0.591897
ISIC_6713432		0.612058	Malignant	Malignant	Benign	0	1	-0.387942
ISIC_6714082		0.446363	Malignant	Benign	Benign	1	1	-0.553637
ISIC_6767569		0	Malignant	Benign	Malignant	0	1	-1
ISIC_6784593		0.153177	Malignant	Benign	Benign	1	1	-0.846823
ISIC_6809586		0	Malignant	Malignant	Benign	0	1	-1
ISIC_6945634		0.507076	Malignant	Malignant	Malignant	1	0	0.507076
ISIC_6982386		0.596953	Malignant	Malignant	Malignant	1	0	0.596953
ISIC_7035246		0.166147	Malignant	Malignant	Malignant	1	0	0.166147
ISIC_7079349		0.709358	Malignant	Malignant	Malignant	1	0	0.709358
ISIC_7100755		0.551393	Malignant	Malignant	Malignant	1	0	0.551393
ISIC_7101732		0.436478	Malignant	Malignant	Malignant	1	0	0.436478
ISIC_7130929		0.566516	Malignant	Malignant	Malignant	1	0	0.566516
ISIC_7205745		0.362229	Malignant	Benign	Benign	1	1	-0.637771
ISIC_7233368		0.400116	Malignant	Malignant	Benign	0	1	-0.599884
ISIC_7253401		0.314169	Malignant	Malignant	Malignant	1	0	0.314169
ISIC_7295035		0.242719	Malignant	Benign	Benign	1	1	-0.757281
ISIC_7577395		0.379838	Malignant	Malignant	Malignant	1	0	0.379838
ISIC_7612992		0.340122	Malignant	Benign	Benign	1	1	-0.659878
ISIC_7626256		0.527699	Malignant	Malignant	Malignant	1	0	0.527699
ISIC_7658729		0.485196	Malignant	Malignant	Malignant	1	0	0.485196
ISIC_7693611		0.518139	Malignant	Malignant	Malignant	1	0	0.518139
ISIC_7788318		0.339698	Malignant	Malignant	Malignant	1	0	0.339698
ISIC_7872595		0.163477	Malignant	Malignant	Malignant	1	0	0.163477
ISIC_7927525		0.485499	Malignant	Benign	Benign	1	1	-0.514501
ISIC_7960321		0.602516	Malignant	Malignant	Malignant	1	0	0.602516
ISIC_8002875		0.325076	Malignant	Malignant	Malignant	1	0	0.325076
ISIC_8027899		0.069458	Malignant	Malignant	Benign	0	1	-0.930542
ISIC_8106899		0.594741	Malignant	Malignant	Malignant	1	0	0.594741
ISIC_8167374		0.370735	Malignant	Malignant	Benign	0	1	-0.629265
ISIC_8175453		0.370977	Malignant	Malignant	Malignant	1	0	0.370977
ISIC_8207974		0.506903	Malignant	Benign	Benign	1	1	-0.493097
ISIC_8281208		0.633813	Malignant	Malignant	Malignant	1	0	0.633813
ISIC_8325226		0.447212	Malignant	Malignant	Malignant	1	0	0.447212
ISIC_8437493		0.398215	Malignant	Malignant	Malignant	1	0	0.398215
ISIC_8485716		0.094715	Malignant	Benign	Malignant	0	1	-0.905285
ISIC_8838753		0.349057	Malignant	Benign	Benign	1	1	-0.650943
ISIC_8892236		0.105964	Malignant	Benign	Benign	1	1	-0.894036
ISIC_9000234		0.207327	Malignant	Benign	Benign	1	1	-0.792673
ISIC_9048507		0.058988	Malignant	Malignant	Benign	0	1	-0.941012
ISIC_9130157		0.318753	Malignant	Benign	Benign	1	1	-0.681247
ISIC_9164054		0.483297	Malignant	Malignant	Malignant	1	0	0.483297
ISIC_9210255		0.650078	Malignant	Malignant	Malignant	1	0	0.650078
ISIC_9685931		0.138928	Malignant	Benign	Benign	1	1	-0.861072
ISIC_9754098		0.52871	Malignant	Malignant	Malignant	1	0	0.52871
ISIC_9770677		0.40368	Malignant	Benign	Benign	1	1	-0.59632
ISIC_9900191		0.540851	Malignant	Malignant	Malignant	1	0	0.540851
						74	45	-10.236

## Sheet: Mali_1_alexnet_mobilenetv2
		Activation Maps Consensus		Network 1	Network 2
Filename	Immagine	Gradcam-Consensus	True_Label	Net1_Prediction	Net2_Prediction	Predict_Consensus	Penalty	Trustworthiness
ISIC_3301933		0.624417	Malignant	Malignant	Malignant	1	0	0.624417
ISIC_3319229		0.30136	Malignant	Benign	Benign	1	1	-0.69864
ISIC_3338629		0.636054	Malignant	Malignant	Malignant	1	0	0.636054
ISIC_3464344		0.482944	Malignant	Benign	Benign	1	1	-0.517056
ISIC_3475660		0.323308	Malignant	Malignant	Malignant	1	0	0.323308
ISIC_3733653		0.321399	Malignant	Malignant	Malignant	1	0	0.321399
ISIC_3775417		0.196779	Malignant	Benign	Malignant	0	1	-0.803221
ISIC_3824206		0.43024	Malignant	Benign	Benign	1	1	-0.56976
ISIC_3944634		0.259582	Malignant	Malignant	Malignant	1	0	0.259582
ISIC_3963183		0.400947	Malignant	Malignant	Malignant	1	0	0.400947
ISIC_3996796		0.270639	Malignant	Benign	Malignant	0	1	-0.729361
ISIC_4377208		0.233641	Malignant	Malignant	Malignant	1	0	0.233641
ISIC_4378189		0.293342	Malignant	Malignant	Malignant	1	0	0.293342
ISIC_4425322		0.088795	Malignant	Malignant	Benign	0	1	-0.911205
ISIC_4584265		0.402295	Malignant	Malignant	Malignant	1	0	0.402295
ISIC_4653503		0.114975	Malignant	Benign	Benign	1	1	-0.885025
ISIC_4874581		0.421075	Malignant	Benign	Benign	1	1	-0.578925
ISIC_4936662		0.530905	Malignant	Malignant	Malignant	1	0	0.530905
ISIC_4938994		0.357936	Malignant	Malignant	Malignant	1	0	0.357936
ISIC_5046082		0.4096	Malignant	Benign	Benign	1	1	-0.5904
ISIC_5147292		0.359925	Malignant	Malignant	Malignant	1	0	0.359925
ISIC_5272223		0.430262	Malignant	Benign	Malignant	0	1	-0.569738
ISIC_5315062		0.246505	Malignant	Benign	Benign	1	1	-0.753495
ISIC_5365617		0.74779	Malignant	Malignant	Malignant	1	0	0.74779
ISIC_5391758		0	Malignant	Benign	Benign	1	1	-1
ISIC_5415761		0.149665	Malignant	Benign	Malignant	0	1	-0.850335
ISIC_5495413		0.650539	Malignant	Malignant	Malignant	1	0	0.650539
ISIC_5667461		0.154688	Malignant	Benign	Benign	1	1	-0.845312
ISIC_5714411		0.55458	Malignant	Malignant	Malignant	1	0	0.55458
ISIC_5732201		0.551628	Malignant	Benign	Malignant	0	1	-0.448372
ISIC_5747486		0.214113	Malignant	Benign	Benign	1	1	-0.785887
ISIC_5747942		0.444221	Malignant	Malignant	Malignant	1	0	0.444221
ISIC_5922588		0.236933	Malignant	Malignant	Malignant	1	0	0.236933
ISIC_6024335		0.276775	Malignant	Malignant	Malignant	1	0	0.276775
ISIC_6056121		0.186803	Malignant	Benign	Benign	1	1	-0.813197
ISIC_6220625		0.123344	Malignant	Malignant	Malignant	1	0	0.123344
ISIC_6285925		0.426259	Malignant	Benign	Benign	1	1	-0.573741
ISIC_6313487		0.559275	Malignant	Malignant	Malignant	1	0	0.559275
ISIC_6348638		0.792551	Malignant	Malignant	Malignant	1	0	0.792551
ISIC_6398283		0.364469	Malignant	Malignant	Malignant	1	0	0.364469
ISIC_6398669		0.476573	Malignant	Malignant	Malignant	1	0	0.476573
ISIC_6613150		0.589292	Malignant	Malignant	Malignant	1	0	0.589292
ISIC_6620377		0.134973	Malignant	Benign	Benign	1	1	-0.865027
ISIC_6625102		0.148361	Malignant	Benign	Malignant	0	1	-0.851639
ISIC_6688417		0.121326	Malignant	Benign	Malignant	0	1	-0.878674
ISIC_6713432		0.588473	Malignant	Malignant	Malignant	1	0	0.588473
ISIC_6714082		0	Malignant	Benign	Malignant	0	1	-1
ISIC_6767569		0.587143	Malignant	Benign	Benign	1	1	-0.412857
ISIC_6784593		0.250664	Malignant	Benign	Benign	1	1	-0.749336
ISIC_6809586		0.209947	Malignant	Malignant	Malignant	1	0	0.209947
ISIC_6945634		0.513975	Malignant	Malignant	Malignant	1	0	0.513975
ISIC_6982386		0.620542	Malignant	Malignant	Malignant	1	0	0.620542
ISIC_7035246		0.183068	Malignant	Malignant	Malignant	1	0	0.183068
ISIC_7079349		0.593718	Malignant	Malignant	Malignant	1	0	0.593718
ISIC_7100755		0.522059	Malignant	Malignant	Malignant	1	0	0.522059
ISIC_7101732		0.337008	Malignant	Malignant	Malignant	1	0	0.337008
ISIC_7130929		0.303101	Malignant	Malignant	Malignant	1	0	0.303101
ISIC_7205745		0.34046	Malignant	Benign	Benign	1	1	-0.65954
ISIC_7233368		0.295443	Malignant	Malignant	Benign	0	1	-0.704557
ISIC_7253401		0.343023	Malignant	Malignant	Malignant	1	0	0.343023
ISIC_7295035		0.245096	Malignant	Benign	Benign	1	1	-0.754904
ISIC_7577395		0.444842	Malignant	Malignant	Malignant	1	0	0.444842
ISIC_7612992		0.380186	Malignant	Benign	Benign	1	1	-0.619814
ISIC_7626256		0.621616	Malignant	Malignant	Malignant	1	0	0.621616
ISIC_7658729		0.272534	Malignant	Malignant	Malignant	1	0	0.272534
ISIC_7693611		0.408129	Malignant	Malignant	Malignant	1	0	0.408129
ISIC_7788318		0.354783	Malignant	Malignant	Malignant	1	0	0.354783
ISIC_7872595		0.173979	Malignant	Malignant	Malignant	1	0	0.173979
ISIC_7927525		0.323253	Malignant	Benign	Benign	1	1	-0.676747
ISIC_7960321		0.09346	Malignant	Malignant	Benign	0	1	-0.90654
ISIC_8002875		0.52508	Malignant	Malignant	Malignant	1	0	0.52508
ISIC_8027899		0.636193	Malignant	Malignant	Malignant	1	0	0.636193
ISIC_8106899		0.621994	Malignant	Malignant	Malignant	1	0	0.621994
ISIC_8167374		0.39852	Malignant	Malignant	Malignant	1	0	0.39852
ISIC_8175453		0.427675	Malignant	Malignant	Malignant	1	0	0.427675
ISIC_8207974		0.48044	Malignant	Benign	Benign	1	1	-0.51956
ISIC_8281208		0.394677	Malignant	Malignant	Malignant	1	0	0.394677
ISIC_8325226		0.446585	Malignant	Malignant	Malignant	1	0	0.446585
ISIC_8437493		0.170744	Malignant	Malignant	Malignant	1	0	0.170744
ISIC_8485716		0.173816	Malignant	Benign	Malignant	0	1	-0.826184
ISIC_8838753		0.103342	Malignant	Benign	Benign	1	1	-0.896658
ISIC_8892236		0.205185	Malignant	Benign	Benign	1	1	-0.794815
ISIC_9000234		0.573375	Malignant	Benign	Benign	1	1	-0.426625
ISIC_9048507		0.324773	Malignant	Malignant	Malignant	1	0	0.324773
ISIC_9130157		0.137779	Malignant	Benign	Benign	1	1	-0.862221
ISIC_9164054		0.09299	Malignant	Malignant	Malignant	1	0	0.09299
ISIC_9210255		0.639343	Malignant	Malignant	Malignant	1	0	0.639343
ISIC_9685931		0.41076	Malignant	Benign	Benign	1	1	-0.58924
ISIC_9754098		0.442616	Malignant	Malignant	Malignant	1	0	0.442616
ISIC_9770677		0.002787	Malignant	Benign	Benign	1	1	-0.997213
ISIC_9900191		0.034301	Malignant	Malignant	Benign	0	1	-0.965699
						78	39	-6.70944

## Sheet: Mali_1_alexnet_resnet18
		Activation Maps Consensus		Network 1	Network 2
Filename	Immagine	Gradcam-Consensus	True_Label	Net1_Prediction	Net2_Prediction	Predict_Consensus	Penalty	Trustworthiness
ISIC_3301933		0.866291	Malignant	Malignant	Malignant	1	0	0.866291
ISIC_3319229		0.50442	Malignant	Benign	Benign	1	1	-0.49558
ISIC_3338629		0.718053	Malignant	Malignant	Malignant	1	0	0.718053
ISIC_3464344		0.307741	Malignant	Benign	Malignant	0	1	-0.692259
ISIC_3475660		0.221892	Malignant	Malignant	Malignant	1	0	0.221892
ISIC_3733653		0.616873	Malignant	Malignant	Malignant	1	0	0.616873
ISIC_3775417		0.437382	Malignant	Benign	Benign	1	1	-0.562618
ISIC_3824206		0.505349	Malignant	Benign	Benign	1	1	-0.494651
ISIC_3944634		0.36376	Malignant	Malignant	Malignant	1	0	0.36376
ISIC_3963183		0.207918	Malignant	Malignant	Malignant	1	0	0.207918
ISIC_3996796		0.414331	Malignant	Benign	Malignant	0	1	-0.585669
ISIC_4377208		0.290433	Malignant	Malignant	Benign	0	1	-0.709567
ISIC_4378189		0.481315	Malignant	Malignant	Malignant	1	0	0.481315
ISIC_4425322		0.169658	Malignant	Malignant	Benign	0	1	-0.830342
ISIC_4584265		0.56468	Malignant	Malignant	Malignant	1	0	0.56468
ISIC_4653503		0.347653	Malignant	Benign	Benign	1	1	-0.652347
ISIC_4874581		0.343836	Malignant	Benign	Benign	1	1	-0.656164
ISIC_4936662		0.483632	Malignant	Malignant	Malignant	1	0	0.483632
ISIC_4938994		0.437663	Malignant	Malignant	Malignant	1	0	0.437663
ISIC_5046082		0.451337	Malignant	Benign	Malignant	0	1	-0.548663
ISIC_5147292		0.710657	Malignant	Malignant	Malignant	1	0	0.710657
ISIC_5272223		0.476377	Malignant	Benign	Benign	1	1	-0.523623
ISIC_5315062		0.369673	Malignant	Benign	Benign	1	1	-0.630327
ISIC_5365617		0.563694	Malignant	Malignant	Malignant	1	0	0.563694
ISIC_5391758		0.327312	Malignant	Benign	Benign	1	1	-0.672688
ISIC_5415761		0	Malignant	Benign	Malignant	0	1	-1
ISIC_5495413		0.145319	Malignant	Malignant	Benign	0	1	-0.854681
ISIC_5667461		0.180106	Malignant	Benign	Malignant	0	1	-0.819894
ISIC_5714411		0.593229	Malignant	Malignant	Malignant	1	0	0.593229
ISIC_5732201		0.512177	Malignant	Benign	Benign	1	1	-0.487823
ISIC_5747486		0.275302	Malignant	Benign	Benign	1	1	-0.724698
ISIC_5747942		0.494931	Malignant	Malignant	Malignant	1	0	0.494931
ISIC_5922588		0.496002	Malignant	Malignant	Malignant	1	0	0.496002
ISIC_6024335		0.455115	Malignant	Malignant	Malignant	1	0	0.455115
ISIC_6056121		0.561227	Malignant	Benign	Benign	1	1	-0.438773
ISIC_6220625		0.218786	Malignant	Malignant	Malignant	1	0	0.218786
ISIC_6285925		0.367409	Malignant	Benign	Benign	1	1	-0.632591
ISIC_6313487		0.362949	Malignant	Malignant	Malignant	1	0	0.362949
ISIC_6348638		0.77384	Malignant	Malignant	Malignant	1	0	0.77384
ISIC_6398283		0.380434	Malignant	Malignant	Malignant	1	0	0.380434
ISIC_6398669		0.617102	Malignant	Malignant	Malignant	1	0	0.617102
ISIC_6613150		0.027063	Malignant	Malignant	Benign	0	1	-0.972937
ISIC_6620377		0.209213	Malignant	Benign	Benign	1	1	-0.790787
ISIC_6625102		0.22513	Malignant	Benign	Malignant	0	1	-0.77487
ISIC_6688417		0.064563	Malignant	Benign	Malignant	0	1	-0.935437
ISIC_6713432		0.606061	Malignant	Malignant	Malignant	1	0	0.606061
ISIC_6714082		0.465056	Malignant	Benign	Benign	1	1	-0.534944
ISIC_6767569		0.048018	Malignant	Benign	Malignant	0	1	-0.951982
ISIC_6784593		0.354821	Malignant	Benign	Benign	1	1	-0.645179
ISIC_6809586		0.313826	Malignant	Malignant	Malignant	1	0	0.313826
ISIC_6945634		0.427135	Malignant	Malignant	Malignant	1	0	0.427135
ISIC_6982386		0.549581	Malignant	Malignant	Malignant	1	0	0.549581
ISIC_7035246		0.191347	Malignant	Malignant	Malignant	1	0	0.191347
ISIC_7079349		0.675159	Malignant	Malignant	Malignant	1	0	0.675159
ISIC_7100755		0.492342	Malignant	Malignant	Malignant	1	0	0.492342
ISIC_7101732		0.435825	Malignant	Malignant	Malignant	1	0	0.435825
ISIC_7130929		0.358637	Malignant	Malignant	Malignant	1	0	0.358637
ISIC_7205745		0.169112	Malignant	Benign	Benign	1	1	-0.830888
ISIC_7233368		0.396853	Malignant	Malignant	Benign	0	1	-0.603147
ISIC_7253401		0.439127	Malignant	Malignant	Malignant	1	0	0.439127
ISIC_7295035		0.588624	Malignant	Benign	Benign	1	1	-0.411376
ISIC_7577395		0.499358	Malignant	Malignant	Malignant	1	0	0.499358
ISIC_7612992		0.569077	Malignant	Benign	Benign	1	1	-0.430923
ISIC_7626256		0.563229	Malignant	Malignant	Malignant	1	0	0.563229
ISIC_7658729		0.494081	Malignant	Malignant	Malignant	1	0	0.494081
ISIC_7693611		0.445922	Malignant	Malignant	Malignant	1	0	0.445922
ISIC_7788318		0.13262	Malignant	Malignant	Malignant	1	0	0.13262
ISIC_7872595		0.289877	Malignant	Malignant	Malignant	1	0	0.289877
ISIC_7927525		0.021567	Malignant	Benign	Malignant	0	1	-0.978433
ISIC_7960321		0.498648	Malignant	Malignant	Malignant	1	0	0.498648
ISIC_8002875		0.583538	Malignant	Malignant	Malignant	1	0	0.583538
ISIC_8027899		0.210356	Malignant	Malignant	Benign	0	1	-0.789644
ISIC_8106899		0.732429	Malignant	Malignant	Malignant	1	0	0.732429
ISIC_8167374		0.628182	Malignant	Malignant	Malignant	1	0	0.628182
ISIC_8175453		0.557463	Malignant	Malignant	Malignant	1	0	0.557463
ISIC_8207974		0.637593	Malignant	Benign	Benign	1	1	-0.362407
ISIC_8281208		0.636861	Malignant	Malignant	Malignant	1	0	0.636861
ISIC_8325226		0.531316	Malignant	Malignant	Malignant	1	0	0.531316
ISIC_8437493		0.266632	Malignant	Malignant	Malignant	1	0	0.266632
ISIC_8485716		0.17381	Malignant	Benign	Malignant	0	1	-0.82619
ISIC_8838753		0.447297	Malignant	Benign	Benign	1	1	-0.552703
ISIC_8892236		0.163319	Malignant	Benign	Benign	1	1	-0.836681
ISIC_9000234		0.493653	Malignant	Benign	Benign	1	1	-0.506347
ISIC_9048507		0.232409	Malignant	Malignant	Malignant	1	0	0.232409
ISIC_9130157		0.291389	Malignant	Benign	Benign	1	1	-0.708611
ISIC_9164054		0.359435	Malignant	Malignant	Malignant	1	0	0.359435
ISIC_9210255		0.743804	Malignant	Malignant	Malignant	1	0	0.743804
ISIC_9685931		0.64214	Malignant	Benign	Benign	1	1	-0.35786
ISIC_9754098		0.51943	Malignant	Malignant	Malignant	1	0	0.51943
ISIC_9770677		0.160512	Malignant	Benign	Benign	1	1	-0.839488
ISIC_9900191		0.683237	Malignant	Malignant	Malignant	1	0	0.683237
						75	41	-3.13747

## Sheet: Mali_1_alexnet_resnet50
		Activation Maps Consensus		Network 1	Network 2
Filename	Immagine	Gradcam-Consensus	True_Label	Net1_Prediction	Net2_Prediction	Predict_Consensus	Penalty	Trustworthiness
ISIC_3301933		0.716088	Malignant	Malignant	Malignant	1	0	0.716088
ISIC_3319229		0.325899	Malignant	Benign	Benign	1	1	-0.674101
ISIC_3338629		0.552599	Malignant	Malignant	Malignant	1	0	0.552599
ISIC_3464344		0.219978	Malignant	Benign	Malignant	0	1	-0.780022
ISIC_3475660		0.144337	Malignant	Malignant	Malignant	1	0	0.144337
ISIC_3733653		0.458841	Malignant	Malignant	Malignant	1	0	0.458841
ISIC_3775417		0.565268	Malignant	Benign	Benign	1	1	-0.434732
ISIC_3824206		0.493677	Malignant	Benign	Benign	1	1	-0.506323
ISIC_3944634		0.386106	Malignant	Malignant	Malignant	1	0	0.386106
ISIC_3963183		0.31969	Malignant	Malignant	Malignant	1	0	0.31969
ISIC_3996796		0.300168	Malignant	Benign	Malignant	0	1	-0.699832
ISIC_4377208		0.263363	Malignant	Malignant	Benign	0	1	-0.736637
ISIC_4378189		0.366509	Malignant	Malignant	Malignant	1	0	0.366509
ISIC_4425322		0.141114	Malignant	Malignant	Benign	0	1	-0.858886
ISIC_4584265		0.640838	Malignant	Malignant	Malignant	1	0	0.640838
ISIC_4653503		0.364348	Malignant	Benign	Benign	1	1	-0.635652
ISIC_4874581		0.309438	Malignant	Benign	Benign	1	1	-0.690562
ISIC_4936662		0.451669	Malignant	Malignant	Malignant	1	0	0.451669
ISIC_4938994		0.518016	Malignant	Malignant	Malignant	1	0	0.518016
ISIC_5046082		0.565246	Malignant	Benign	Benign	1	1	-0.434754
ISIC_5147292		0.26647	Malignant	Malignant	Benign	0	1	-0.73353
ISIC_5272223		0.606416	Malignant	Benign	Benign	1	1	-0.393584
ISIC_5315062		0.545541	Malignant	Benign	Benign	1	1	-0.454459
ISIC_5365617		0.470635	Malignant	Malignant	Benign	0	1	-0.529365
ISIC_5391758		0	Malignant	Benign	Malignant	0	1	-1
ISIC_5415761		0.168507	Malignant	Benign	Malignant	0	1	-0.831493
ISIC_5495413		0.232353	Malignant	Malignant	Benign	0	1	-0.767647
ISIC_5667461		0.094687	Malignant	Benign	Malignant	0	1	-0.905313
ISIC_5714411		0.384976	Malignant	Malignant	Malignant	1	0	0.384976
ISIC_5732201		0.56419	Malignant	Benign	Benign	1	1	-0.43581
ISIC_5747486		0.346039	Malignant	Benign	Benign	1	1	-0.653961
ISIC_5747942		0.543315	Malignant	Malignant	Malignant	1	0	0.543315
ISIC_5922588		0.607325	Malignant	Malignant	Malignant	1	0	0.607325
ISIC_6024335		0.383148	Malignant	Malignant	Malignant	1	0	0.383148
ISIC_6056121		0.346764	Malignant	Benign	Malignant	0	1	-0.653236
ISIC_6220625		0.27118	Malignant	Malignant	Malignant	1	0	0.27118
ISIC_6285925		0.684799	Malignant	Benign	Benign	1	1	-0.315201
ISIC_6313487		0.494692	Malignant	Malignant	Malignant	1	0	0.494692
ISIC_6348638		0.802933	Malignant	Malignant	Malignant	1	0	0.802933
ISIC_6398283		0.325336	Malignant	Malignant	Malignant	1	0	0.325336
ISIC_6398669		0.634706	Malignant	Malignant	Malignant	1	0	0.634706
ISIC_6613150		0.80981	Malignant	Malignant	Malignant	1	0	0.80981
ISIC_6620377		0.251741	Malignant	Benign	Benign	1	1	-0.748259
ISIC_6625102		0.160479	Malignant	Benign	Malignant	0	1	-0.839521
ISIC_6688417		0.106411	Malignant	Benign	Malignant	0	1	-0.893589
ISIC_6713432		0.377533	Malignant	Malignant	Benign	0	1	-0.622467
ISIC_6714082		0.318692	Malignant	Benign	Benign	1	1	-0.681308
ISIC_6767569		0.66497	Malignant	Benign	Benign	1	1	-0.33503
ISIC_6784593		0.497928	Malignant	Benign	Benign	1	1	-0.502072
ISIC_6809586		0.14286	Malignant	Malignant	Malignant	1	0	0.14286
ISIC_6945634		0.442787	Malignant	Malignant	Malignant	1	0	0.442787
ISIC_6982386		0.661113	Malignant	Malignant	Malignant	1	0	0.661113
ISIC_7035246		0.178615	Malignant	Malignant	Malignant	1	0	0.178615
ISIC_7079349		0.750008	Malignant	Malignant	Malignant	1	0	0.750008
ISIC_7100755		0.489785	Malignant	Malignant	Malignant	1	0	0.489785
ISIC_7101732		0.304965	Malignant	Malignant	Malignant	1	0	0.304965
ISIC_7130929		0.696601	Malignant	Malignant	Malignant	1	0	0.696601
ISIC_7205745		0.136298	Malignant	Benign	Benign	1	1	-0.863702
ISIC_7233368		0.380669	Malignant	Malignant	Benign	0	1	-0.619331
ISIC_7253401		0.460202	Malignant	Malignant	Malignant	1	0	0.460202
ISIC_7295035		0.526702	Malignant	Benign	Benign	1	1	-0.473298
ISIC_7577395		0.504488	Malignant	Malignant	Malignant	1	0	0.504488
ISIC_7612992		0.453922	Malignant	Benign	Malignant	0	1	-0.546078
ISIC_7626256		0.619432	Malignant	Malignant	Malignant	1	0	0.619432
ISIC_7658729		0.320246	Malignant	Malignant	Malignant	1	0	0.320246
ISIC_7693611		0.404311	Malignant	Malignant	Malignant	1	0	0.404311
ISIC_7788318		0.28814	Malignant	Malignant	Malignant	1	0	0.28814
ISIC_7872595		0.345989	Malignant	Malignant	Malignant	1	0	0.345989
ISIC_7927525		0.58909	Malignant	Benign	Benign	1	1	-0.41091
ISIC_7960321		0.58633	Malignant	Malignant	Malignant	1	0	0.58633
ISIC_8002875		0.683365	Malignant	Malignant	Malignant	1	0	0.683365
ISIC_8027899		0.368174	Malignant	Malignant	Benign	0	1	-0.631826
ISIC_8106899		0.782575	Malignant	Malignant	Malignant	1	0	0.782575
ISIC_8167374		0.572886	Malignant	Malignant	Malignant	1	0	0.572886
ISIC_8175453		0.585305	Malignant	Malignant	Malignant	1	0	0.585305
ISIC_8207974		0.437283	Malignant	Benign	Benign	1	1	-0.562717
ISIC_8281208		0.349385	Malignant	Malignant	Malignant	1	0	0.349385
ISIC_8325226		0.519133	Malignant	Malignant	Malignant	1	0	0.519133
ISIC_8437493		0.426024	Malignant	Malignant	Malignant	1	0	0.426024
ISIC_8485716		0.197657	Malignant	Benign	Malignant	0	1	-0.802343
ISIC_8838753		0.392901	Malignant	Benign	Benign	1	1	-0.607099
ISIC_8892236		0.184998	Malignant	Benign	Benign	1	1	-0.815002
ISIC_9000234		0.4711	Malignant	Benign	Benign	1	1	-0.5289
ISIC_9048507		0.321425	Malignant	Malignant	Malignant	1	0	0.321425
ISIC_9130157		0.424847	Malignant	Benign	Benign	1	1	-0.575153
ISIC_9164054		0.622341	Malignant	Malignant	Malignant	1	0	0.622341
ISIC_9210255		0.649739	Malignant	Malignant	Malignant	1	0	0.649739
ISIC_9685931		0.504012	Malignant	Benign	Benign	1	1	-0.495988
ISIC_9754098		0.384065	Malignant	Malignant	Malignant	1	0	0.384065
ISIC_9770677		0.442353	Malignant	Benign	Benign	1	1	-0.557647
ISIC_9900191		0.631665	Malignant	Malignant	Malignant	1	0	0.631665
						73	43	-3.70145

[truncated: 160 more sheets: Mali_1_alexnet_shufflenet, Mali_1_alexnet_vgg16, Mali_1_alexnet_vgg19, Mali_1_alexnet_xception, Mali_1_densenet_alexnet, Mali_1_densenet_densenet, Mali_1_densenet_efficientnetb0, Mali_1_densenet_googlenet, Mali_1_densenet_inceptionresnet, Mali_1_densenet_inceptionv3, Mali_1_densenet_mobilenetv2, Mali_1_densenet_resnet18, Mali_1_densenet_resnet50, Mali_1_densenet_shufflenet, Mali_1_densenet_vgg16, Mali_1_densenet_vgg19, Mali_1_densenet_xception, Mali_1_efficientnetb0_alexnet, Mali_1_efficientnetb0_densenet, Mali_1_efficientnetb0_efficient …]
