# Supplementary material for: Towards trustworthy digital health: reliability of uncertainty-aware convolutional neural networks
Source: PeerJ journal article supplement (doi:10.7717/peerj-cs.3414), 2026-01-28
Supplement: trustworthinessmain.zip [file Diabetic_Retinopathy_Mild.xlsx]

## Sheet: Mild_Alexnet_Alexnet
		Activation Maps Consensus		Network 1	Network 2
Immagine	Immagine	Gradcam-Consensus	True_Label	Alexnet_Scratch	Alexnet_Scratch	Predict_Consensus	Penalty	Trustability
c739ff9580d3	c739ff9580d3	1	Mild	Moderate	Moderate	1	1	0
c7b622ec8104	c7b622ec8104	1	Mild	Mild	Mild	1	0	1
c8fc0df22999	c8fc0df22999	1	Mild	Mild	Mild	1	0	1
c9485c38fdd5	c9485c38fdd5	1	Mild	Mild	Mild	1	0	1
c96f743915b5	c96f743915b5	1	Mild	Mild	Mild	1	0	1
ca1036496659	ca1036496659	1	Mild	Mild	Mild	1	0	1
ca25745942b0	ca25745942b0	1	Mild	Mild	Mild	1	0	1
ca30a97e9d13	ca30a97e9d13	1	Mild	Mild	Mild	1	0	1
ca63fe4f4b52	ca63fe4f4b52	1	Mild	Mild	Mild	1	0	1
ca6842bfcbc9	ca6842bfcbc9	1	Mild	Mild	Mild	1	0	1
ca7140ecf389	ca7140ecf389	1	Mild	Moderate	Moderate	1	1	0
cab3dfa7962d	cab3dfa7962d	1	Mild	Mild	Mild	1	0	1
cae51154e1ce	cae51154e1ce	1	Mild	No_DR	No_DR	1	1	0
cb2f3c5d71a7	cb2f3c5d71a7	1	Mild	No_DR	No_DR	1	1	0
cc12453ea915	cc12453ea915	1	Mild	Mild	Mild	1	0	1
cc9270f06b65	cc9270f06b65	1	Mild	Mild	Mild	1	0	1
cd45bfa07d41	cd45bfa07d41	1	Mild	Moderate	Moderate	1	1	0
cd5714db652d	cd5714db652d	1	Mild	Mild	Mild	1	0	1
cf0575534cec	cf0575534cec	1	Mild	Moderate	Moderate	1	1	0
cf603a9ef2d5	cf603a9ef2d5	1	Mild	Mild	Mild	1	0	1
cfd1bd0fcbb4	cfd1bd0fcbb4	1	Mild	No_DR	No_DR	1	1	0
d06ccd0cf4b8	d06ccd0cf4b8	1	Mild	No_DR	No_DR	1	1	0
d0d59ed675b5	d0d59ed675b5	1	Mild	Mild	Mild	1	0	1
d1cad012a254	d1cad012a254	1	Mild	Mild	Mild	1	0	1
d3de0d313d61	d3de0d313d61	1	Mild	No_DR	No_DR	1	1	0
d4f32b9c07df	d4f32b9c07df	1	Mild	Moderate	Moderate	1	1	0
d567a1a22d33	d567a1a22d33	1	Mild	Mild	Mild	1	0	1
d5b4705ac2ee	d5b4705ac2ee	1	Mild	No_DR	No_DR	1	1	0
d66b6f333dc7	d66b6f333dc7	1	Mild	Moderate	Moderate	1	1	0
d66ccb75ada1	d66ccb75ada1	1	Mild	Mild	Mild	1	0	1
d6e26fe51dce	d6e26fe51dce	1	Mild	Moderate	Moderate	1	1	0
d801c0a66738	d801c0a66738	1	Mild	Moderate	Moderate	1	1	0
d85588ff2ebd	d85588ff2ebd	1	Mild	Mild	Mild	1	0	1
d85d052900b4	d85d052900b4	1	Mild	Mild	Mild	1	0	1
da1fb35f5df9	da1fb35f5df9	1	Mild	Mild	Mild	1	0	1
db4ed1e07aa3	db4ed1e07aa3	1	Mild	Mild	Mild	1	0	1
db690e2d02f8	db690e2d02f8	1	Mild	Mild	Mild	1	0	1
dbd062558b81	dbd062558b81	1	Mild	Mild	Mild	1	0	1
dd19428c3d29	dd19428c3d29	1	Mild	Mild	Mild	1	0	1
e07045d7c5f7	e07045d7c5f7	1	Mild	Mild	Mild	1	0	1
e25ccfe38e44	e25ccfe38e44	1	Mild	No_DR	No_DR	1	1	0
e26d8718ca58	e26d8718ca58	1	Mild	No_DR	No_DR	1	1	0
e2a233493b90	e2a233493b90	1	Mild	Mild	Mild	1	0	1
e38f3a65b02b	e38f3a65b02b	1	Mild	Proliferate_DR	Proliferate_DR	1	1	0
e55188915f9d	e55188915f9d	1	Mild	Mild	Mild	1	0	1
e580676516b0	e580676516b0	1	Mild	No_DR	No_DR	1	1	0
e9286ddf6ffe	e9286ddf6ffe	1	Mild	Proliferate_DR	Proliferate_DR	1	1	0
e96bd80a8a53	e96bd80a8a53	1	Mild	Mild	Mild	1	0	1
e9ff9352ccb3	e9ff9352ccb3	1	Mild	Mild	Mild	1	0	1
ea15a290eb96	ea15a290eb96	1	Mild	No_DR	No_DR	1	1	0
ead23cc922ed	ead23cc922ed	1	Mild	Mild	Mild	1	0	1
eba3acc42197	eba3acc42197	1	Mild	Moderate	Moderate	1	1	0
ec4649213ccf	ec4649213ccf	1	Mild	Mild	Mild	1	0	1
ee78ce914066	ee78ce914066	1	Mild	Mild	Mild	1	0	1
eeb231c3ef1f	eeb231c3ef1f	1	Mild	Mild	Mild	1	0	1
eed4afc8ec83	eed4afc8ec83	1	Mild	No_DR	No_DR	1	1	0
ef8109305128	ef8109305128	1	Mild	Mild	Mild	1	0	1
f0c13be90519	f0c13be90519	1	Mild	Moderate	Moderate	1	1	0
f47a2a4a0411	f47a2a4a0411	1	Mild	Moderate	Moderate	1	1	0
f481f76a6b75	f481f76a6b75	1	Mild	Mild	Mild	1	0	1
f55e1d2a19e4	f55e1d2a19e4	1	Mild	Mild	Mild	1	0	1
f5650eb52640	f5650eb52640	1	Mild	Mild	Mild	1	0	1
f6f7dba7104d	f6f7dba7104d	1	Mild	Mild	Mild	1	0	1
f72ef9ceeaa8	f72ef9ceeaa8	1	Mild	No_DR	No_DR	1	1	0
f762c272c522	f762c272c522	1	Mild	Mild	Mild	1	0	1
f7fec8935126	f7fec8935126	1	Mild	Mild	Mild	1	0	1
fb6b8200b7f8	fb6b8200b7f8	1	Mild	Mild	Mild	1	0	1
fca931da5c5e	fca931da5c5e	1	Mild	Mild	Mild	1	0	1
fd62bd0db4f1	fd62bd0db4f1	1	Mild	No_DR	No_DR	1	1	0
fdd18ccbbdc5	fdd18ccbbdc5	1	Mild	Moderate	Moderate	1	1	0
fe2df69676cf	fe2df69676cf	1	Mild	Mild	Mild	1	0	1
fe674c2f73f5	fe674c2f73f5	1	Mild	Mild	Mild	1	0	1
fea14b3d44b0	fea14b3d44b0	1	Mild	Mild	Mild	1	0	1
fecf4c5ae84b	fecf4c5ae84b	1	Mild	Mild	Mild	1	0	1
		74				74	27	47
c87493ed320c			Moderate	Moderate	Moderate
c8823cdaf7fa			Moderate	Moderate	Moderate
c8905b8d5cf1			Moderate	No_DR	No_DR
c8a3eb9a5b52			Moderate	Moderate	Moderate
c9d42d7534e0			Moderate	Moderate	Moderate
c9f0dc2c8b43			Moderate	Moderate	Moderate
ca0f1a17c8e5			Moderate	Moderate	Moderate
ca360bec5851			Moderate	Moderate	Moderate
ca7570c5925c			Moderate	Moderate	Moderate
ca7f5caddf96			Moderate	Moderate	Moderate
ca891d37a43c			Moderate	Moderate	Moderate
ca9c912ebad7			Moderate	Moderate	Moderate
cac40227d3b2			Moderate	Moderate	Moderate
cac80797770f			Moderate	Mild	Mild
caec68f11c86			Moderate	No_DR	No_DR
cb602182cde3			Moderate	Moderate	Moderate
cb75210abebe			Moderate	Moderate	Moderate
cbc2e57447c2			Moderate	Moderate	Moderate
cbf0394039f8			Moderate	Moderate	Moderate
cc1eebed9276			Moderate	Moderate	Moderate
cc839823755b			Moderate	Moderate	Moderate
cca626a0e19a			Moderate	Moderate	Moderate
ccd34029493d			Moderate	Moderate	Moderate
cd29c88c9e36			Moderate	Moderate	Moderate
cd3fd04d72f5			Moderate	Moderate	Moderate
cd4e7f9fa1a9			Moderate	Moderate	Moderate
cd9e2190c73f			Moderate	Moderate	Moderate
ce887b196c23			Moderate	Moderate	Moderate
ceaa5803d780			Moderate	Moderate	Moderate
ceb601fe8dba			Moderate	Moderate	Moderate
cf0824f53dd9			Moderate	Moderate	Moderate
d10d315f123f			Moderate	Moderate	Moderate
d141728fa392			Moderate	Moderate	Moderate
d144144a2f3f			Moderate	Moderate	Moderate
d15ca3469b87			Moderate	No_DR	No_DR
d18aea8238a0			Moderate	Moderate	Moderate
d18b1d8ac4de			Moderate	Moderate	Moderate
d18e5b68f6d2			Moderate	Moderate	Moderate
d1f1ea894da1			Moderate	Moderate	Moderate
d1fb4efb117c			Moderate	Moderate	Moderate
d25b8a8ad3c4			Moderate	Moderate	Moderate
d264396d8d1a			Moderate	Moderate	Moderate
d28bd830c171			Moderate	Moderate	Moderate
d29096bd94aa			Moderate	Moderate	Moderate
d2c6b99ef62c			Moderate	Moderate	Moderate
d364423ec6f9			Moderate	Moderate	Moderate
d3be5346684b			Moderate	No_DR	No_DR
d3d578fe433f			Moderate	Moderate	Moderate
d41b33fcb94f			Moderate	Moderate	Moderate
d473f6fafba0			Moderate	Mild	Mild
d4be0403e6ab			Moderate	No_DR	No_DR
d5a39339ff3d			Moderate	Moderate	Moderate
d6228d951958			Moderate	Moderate	Moderate
d6283ded6aea			Moderate	Moderate	Moderate
d67374d3fa2a			Moderate	Moderate	Moderate
d81338217fc5			Moderate	Moderate	Moderate
d81b6ed83bc2			Moderate	Moderate	Moderate
d83c3efade75			Moderate	Moderate	Moderate
d83d0695e215			Moderate	Moderate	Moderate
d8404680bba6			Moderate	No_DR	No_DR
d85a842d20bd			Moderate	Moderate	Moderate
d88806d9ece9			Moderate	Moderate	Moderate
d8cdb7d7283a			Moderate	Severe	Severe
d91273efb92a			Moderate	Moderate	Moderate
d9311f7497cb			Moderate	Moderate	Moderate
d94e10f42861			Moderate	Moderate	Moderate
d952dbfb0fe4			Moderate	Moderate	Moderate
d95959798b57			Moderate	Moderate	Moderate
d968a983d4d2			Moderate	Moderate	Moderate
d990a3f0cbdb			Moderate	Moderate	Moderate
d994203deb64			Moderate	Moderate	Moderate
d9a475dfe59a			Moderate	Moderate	Moderate
d9bbdc33db83			Moderate	Moderate	Moderate
da0a1043abf7			Moderate	Moderate	Moderate
da44f80b422b			Moderate	Severe	Severe
da8900ac7f29			Moderate	Moderate	Moderate
daeaa5d8cf70			Moderate	Moderate	Moderate
db49cdf1ea64			Moderate	Moderate	Moderate
dbee04ae6426			Moderate	Moderate	Moderate
dc3c0d8ee20b			Moderate	Moderate	Moderate
dc6fa1b38b83			Moderate	Proliferate_DR	Proliferate_DR
dd110d2b8c21			Moderate	Moderate	Moderate
dde43aa22ae6			Moderate	Moderate	Moderate
de50dfa745f8			Moderate	Moderate	Moderate
de778495a1cd			Moderate	Moderate	Moderate
dee687c6e88a			Moderate	Moderate	Moderate
df3adfd6ba36			Moderate	Moderate	Moderate
df5ce3ea7820			Moderate	Moderate	Moderate
df8365d6ac33			Moderate	Moderate	Moderate
df841a0440d8			Moderate	Mild	Mild
e03e70bc8bba			Moderate	Mild	Mild
e06d3d4733f0			Moderate	Moderate	Moderate
e0863b353093			Moderate	Moderate	Moderate
e10190a9d52f			Moderate	Moderate	Moderate
e12b67835e03			Moderate	No_DR	No_DR
e12d41e7b221			Moderate	Moderate	Moderate
e1418d28d668			Moderate	No_DR	No_DR
e150935f66a6			Moderate	No_DR	No_DR
e16fc934069f			Moderate	Moderate	Moderate
e17507a4a1f5			Moderate	Mild	Mild
e1e490773462			Moderate	Moderate	Moderate
e2161692a0b4			Moderate	No_DR	No_DR
e229aca862c7			Moderate	Moderate	Moderate
e265c870f9b3			Moderate	Moderate	Moderate
e2856afe62c5			Moderate	Moderate	Moderate
e2a47a74e6e1			Moderate	Moderate	Moderate
e31c42a8652b			Moderate	Moderate	Moderate
e34fa07bd64d			Moderate	Moderate	Moderate
e387311a840e			Moderate	Moderate	Moderate
e3a7671f787b			Moderate	Moderate	Moderate
e3e490babc0c			Moderate	Moderate	Moderate
e4151feb8443			Moderate	Proliferate_DR	Proliferate_DR
e499434242cc			Moderate	Moderate	Moderate
e4e343eaae2a			Moderate	Moderate	Moderate
e540d2e35d15			Moderate	Moderate	Moderate
e599151ca14b			Moderate	Moderate	Moderate
e5d56f4f359b			Moderate	Moderate	Moderate
e65a2ff90494			Moderate	Moderate	Moderate
e65f94ad9be3			Moderate	Moderate	Moderate
e663c6627a95			Moderate	Moderate	Moderate
e6a58edc5b42			Moderate	Moderate	Moderate
e6a6acf7fca1			Moderate	Moderate	Moderate
e6f0ce5bf282			Moderate	Moderate	Moderate
e724866f5084			Moderate	Moderate	Moderate
e756495c11cb			Moderate	Moderate	Moderate
e7a372a1c3a4			Moderate	Mild	Mild
e7a7187066ad			Moderate	Moderate	Moderate
e7defafeb957			Moderate	Moderate	Moderate
e7fc93ac5b6d			Moderate	Moderate	Moderate
e811f39a1243			Moderate	Mild	Mild
e83d315d8f98			Moderate	Moderate	Moderate
e85d410d6836			Moderate	Moderate	Moderate
e868c3da340b			Moderate	Moderate	Moderate
e9129ce55fd7			Moderate	No_DR	No_DR
e96099b961b4			Moderate	Moderate	Moderate
e9f82b5bbaf4			Moderate	Moderate	Moderate
ea05c22d92e9			Moderate	Moderate	Moderate
ea1d045f9fea			Moderate	Moderate	Moderate
ea4dcb055139			Moderate	Severe	Severe
ea588d1e5d96			Moderate	Moderate	Moderate
ea9e0fb6fb0b			Moderate	Moderate	Moderate
eadfc8809ec8			Moderate	Moderate	Moderate
eae901557a84			Moderate	Moderate	Moderate
eb1ad14dd281			Moderate	Moderate	Moderate
eb32a815f78c			Moderate	Moderate	Moderate
ed2c06fcc573			Moderate	Moderate	Moderate
ed88faaa325a			Moderate	Moderate	Moderate
ee02294cc3d9			Moderate	Moderate	Moderate
ee059945b08a			Moderate	Moderate	Moderate
ee2c2a5f7d0e			Moderate	Moderate	Moderate
ee6e39319b39			Moderate	Moderate	Moderate
ee74c3b177e0			Moderate	Proliferate_DR	Proliferate_DR
ef7a4ed8d5d1			Moderate	Moderate	Moderate
efff2f1a35f5			Moderate	Mild	Mild
f0800723bc63			Moderate	Moderate	Moderate
f0c0f7b5e820			Moderate	Moderate	Moderate
f18abfa690ab			Moderate	Moderate	Moderate
f1a761c68559			Moderate	Moderate	Moderate
f2094a20b275			Moderate	Moderate	Moderate
f23902998c21			Moderate	Moderate	Moderate
f2ee81781411			Moderate	Moderate	Moderate
f30f203ef51e			Moderate	Moderate	Moderate
f3a268d2726d			Moderate	No_DR	No_DR
f3a88d3026dc			Moderate	Moderate	Moderate
f3b6b7ca1eb1			Moderate	Mild	Mild
f3cd489acbee			Moderate	Moderate	Moderate
f45f1485c940			Moderate	Moderate	Moderate
f460608cf4cc			Moderate	Moderate	Moderate
f4d3777f2710			Moderate	Moderate	Moderate
f583a722434c			Moderate	No_DR	No_DR
f5e9a307288c			Moderate	Moderate	Moderate
f61bf44c677c			Moderate	Moderate	Moderate
f69400b316a7			Moderate	Moderate	Moderate
f7edc074f06b			Moderate	Severe	Severe
f80118bbda18			Moderate	Moderate	Moderate
f8372e80f731			Moderate	Moderate	Moderate
f8fc411092c7			Moderate	Moderate	Moderate
f920ccd926db			Moderate	Moderate	Moderate
f999c6921e6d			Moderate	Moderate	Moderate
f9aa35187bf3			Moderate	No_DR	No_DR
f9e779a13204			Moderate	Proliferate_DR	Proliferate_DR
f9ecf1795804			Moderate	Moderate	Moderate
fa3e544a7401			Moderate	Moderate	Moderate
fa748b57262b			Moderate	Moderate	Moderate
fac399455195			Moderate	Moderate	Moderate
fba493e17448			Moderate	Proliferate_DR	Proliferate_DR
fc1b1841eadf			Moderate	Moderate	Moderate
fc4c2d35c6f8			Moderate	Moderate	Moderate
fc4d69128e7c			Moderate	Moderate	Moderate
fc603cbedb41			Moderate	Moderate	Moderate
fcc55ae641ae			Moderate	Moderate	Moderate
fd48cf452e9d			Moderate	Moderate	Moderate
fe37f4492920			Moderate	Moderate	Moderate
ff0740cb484a			Moderate	Moderate	Moderate
ff344e5c9341			Moderate	Moderate	Moderate
ff52392372d3			Moderate	Moderate	Moderate
ff77e8e5b5f3			Moderate	Mild	Mild
ffa47f6a7bf4			Moderate	Moderate	Moderate
ffcf7b45f213			Moderate	Moderate	Moderate
ffec9a18a3ce			Moderate	Moderate	Moderate
cfb17a7cc8d4			No_DR	No_DR	No_DR
cfdbaef73a8b			No_DR	No_DR	No_DR
cfed7c1172ec			No_DR	No_DR	No_DR
cff262ed8f4c			No_DR	No_DR	No_DR
cffc50047828			No_DR	No_DR	No_DR
d02b79fc3200			No_DR	No_DR	No_DR
d0926ed2c8e5			No_DR	No_DR	No_DR
d160ebef4117			No_DR	No_DR	No_DR
d16e39b9d6f0			No_DR	No_DR	No_DR
d16e59a2b33a			No_DR	No_DR	No_DR
d18f6431ebce			No_DR	No_DR	No_DR
d1a60c3b9fe5			No_DR	No_DR	No_DR
d1afdb8cf70d			No_DR	No_DR	No_DR
d1b279cc02ae			No_DR	No_DR	No_DR
d1ca85af57c9			No_DR	No_DR	No_DR
d1cf31577a59			No_DR	No_DR	No_DR
d1f7ea924a01			No_DR	No_DR	No_DR
d1fa0f744620			No_DR	No_DR	No_DR
d26bb2ed6e71			No_DR	No_DR	No_DR
d26bc6e1230d			No_DR	No_DR	No_DR
d27ac9e54901			No_DR	No_DR	No_DR
d29b37d110f3			No_DR	No_DR	No_DR
d2afca74cbc3			No_DR	No_DR	No_DR
d2c5fb82fe5f			No_DR	No_DR	No_DR
d2cd47ed2c1d			No_DR	No_DR	No_DR
d2d523e9f669			No_DR	No_DR	No_DR
d2dc86021c67			No_DR	No_DR	No_DR
d2fb715b0c41			No_DR	No_DR	No_DR
d30d079e6f9a			No_DR	No_DR	No_DR
d332d7b8a26e			No_DR	No_DR	No_DR
d38cf0f4a9af			No_DR	No_DR	No_DR
d39752cb6e57			No_DR	No_DR	No_DR
d3dfd0a2dee6			No_DR	No_DR	No_DR
d3e56584a481			No_DR	No_DR	No_DR
d436c06f0490			No_DR	No_DR	No_DR
d4583e9525dc			No_DR	No_DR	No_DR
d4bc001f7224			No_DR	No_DR	No_DR
d516f77d4516			No_DR	No_DR	No_DR
d51c2153d151			No_DR	No_DR	No_DR
d51e5d7484ea			No_DR	No_DR	No_DR
d56d32a1d62d			No_DR	No_DR	No_DR
d57d1be1bbd1			No_DR	No_DR	No_DR
d5ad3362424c			No_DR	No_DR	No_DR
d5c63a8d9e94			No_DR	No_DR	No_DR
d6130f2ec903			No_DR	No_DR	No_DR
d667af5742f6			No_DR	No_DR	No_DR
d6803e467592			No_DR	No_DR	No_DR
d69698f838db			No_DR	No_DR	No_DR
d6b109c82067			No_DR	No_DR	No_DR
d6dbb0820ea5			No_DR	No_DR	No_DR
d6df4fe492ec			No_DR	No_DR	No_DR
d6f36ec5564a			No_DR	No_DR	No_DR
d6f6bdfd8011			No_DR	No_DR	No_DR
d7078e8b0349			No_DR	No_DR	No_DR
d74ccc796517			No_DR	No_DR	No_DR
d774692d9919			No_DR	No_DR	No_DR
d78b7401096f			No_DR	No_DR	No_DR
d7a01fca9838			No_DR	No_DR	No_DR
d7ab5c040294			No_DR	No_DR	No_DR
d7ac4a0c9760			No_DR	No_DR	No_DR
d7bc00091cfc			No_DR	No_DR	No_DR
d7bc62d60e8c			No_DR	No_DR	No_DR
d7e5fe5245e0			No_DR	No_DR	No_DR
d807c53c1399			No_DR	No_DR	No_DR
d838d5b9f571			No_DR	No_DR	No_DR
d844a7252f4e			No_DR	No_DR	No_DR
d865997a6280			No_DR	No_DR	No_DR
d866c26d76f0			No_DR	No_DR	No_DR
d871895742b1			No_DR	No_DR	No_DR
d881c04f01fe			No_DR	No_DR	No_DR
d88c4843aec3			No_DR	No_DR	No_DR
d8da9de62743			No_DR	No_DR	No_DR
d911dd40c63b			No_DR	No_DR	No_DR
d91635f380b4			No_DR	No_DR	No_DR
d93b61dc8f64			No_DR	Moderate	Moderate
d97911a32918			No_DR	No_DR	No_DR
d99b0f7dd9b9			No_DR	No_DR	No_DR
d99dd99be001			No_DR	No_DR	No_DR
d9ad2a0ec026			No_DR	No_DR	No_DR
d9c9b9786da3			No_DR	No_DR	No_DR
d9d2631f043c			No_DR	No_DR	No_DR
d9e58e4d8689			No_DR	Moderate	Moderate
da0a83f074f3			No_DR	No_DR	No_DR
da2bdf4236ac			No_DR	No_DR	No_DR
da3a2275c850			No_DR	No_DR	No_DR
da6389d129aa			No_DR	Moderate	Moderate
da6bbb76d562			No_DR	No_DR	No_DR
da9262d9f5d9			No_DR	No_DR	No_DR
da949aa67a4f			No_DR	No_DR	No_DR
da9574d35b82			No_DR	No_DR	No_DR
da9fe02dead3			No_DR	No_DR	No_DR
daad7b617f21			No_DR	No_DR	No_DR
daff5427c9b2			No_DR	No_DR	No_DR
db3cd58aa315			No_DR	No_DR	No_DR
db52626d450c			No_DR	No_DR	No_DR
db6207e62c7b			No_DR	No_DR	No_DR
dc0eea0b68a7			No_DR	No_DR	No_DR
dc0f6e5b489b			No_DR	No_DR	No_DR
dcc6c0ad5cad			No_DR	No_DR	No_DR
dccdf750c962			No_DR	No_DR	No_DR
dce73d90c00c			No_DR	No_DR	No_DR
dcf109df1a2b			No_DR	No_DR	No_DR
dd02d60bef14			No_DR	No_DR	No_DR
dd285d9e97fe			No_DR	No_DR	No_DR
dd3176bacfe2			No_DR	No_DR	No_DR
dd90c321d7bc			No_DR	No_DR	No_DR
ddb222ff7c1d			No_DR	No_DR	No_DR
de18071c36e6			No_DR	No_DR	No_DR
de2eb5c8aa83			No_DR	No_DR	No_DR
de38adaae009			No_DR	No_DR	No_DR
de4cdabbce6d			No_DR	No_DR	No_DR
de55ed25e0e8			No_DR	No_DR	No_DR
de57c9e9fa93			No_DR	No_DR	No_DR
de6210f88536			No_DR	No_DR	No_DR
de730033c683			No_DR	No_DR	No_DR
dea7538bb91a			No_DR	No_DR	No_DR
dec5595e6154			No_DR	No_DR	No_DR
dee1031a76ae			No_DR	No_DR	No_DR
dee31065f8fe			No_DR	No_DR	No_DR
df0886f1e76b			No_DR	No_DR	No_DR
df6d13d04da1			No_DR	No_DR	No_DR
df9cb3729eb1			No_DR	No_DR	No_DR
dfc7ec7db0e0			No_DR	No_DR	No_DR
dfea19863428			No_DR	No_DR	No_DR
e01b7bac822b			No_DR	No_DR	No_DR
e0313be77035			No_DR	No_DR	No_DR
e03a74e7d74f			No_DR	No_DR	No_DR
e04f3c6619a3			No_DR	No_DR	No_DR
e067b06fd655			No_DR	No_DR	No_DR
e06cccc08c59			No_DR	No_DR	No_DR
e087bd4b88f2			No_DR	No_DR	No_DR
e0d229db881a			No_DR	No_DR	No_DR
e12df54e0d1e			No_DR	No_DR	No_DR
e12f9f19d1be			No_DR	No_DR	No_DR
e135d7ba9a0e			No_DR	No_DR	No_DR
e160a3b19911			No_DR	No_DR	No_DR
e16af45285e5			No_DR	No_DR	No_DR
e1ab92228e60			No_DR	Mild	Mild
e1b8acb1cea1			No_DR	No_DR	No_DR
e1c02f6c3362			No_DR	No_DR	No_DR
e1dc02a3dc2a			No_DR	No_DR	No_DR
e2265c383348			No_DR	No_DR	No_DR
e246cd89e1cc			No_DR	No_DR	No_DR
e251bdf05b85			No_DR	No_DR	No_DR
e26bcae6c67b			No_DR	No_DR	No_DR
e29e54ff921e			No_DR	No_DR	No_DR
e2c39ed0c941			No_DR	No_DR	No_DR
e2c3b037413b			No_DR	Mild	Mild
e2ec22b3d07e			No_DR	No_DR	No_DR
e30a890600e1			No_DR	No_DR	No_DR
e322acd46152			No_DR	No_DR	No_DR
e33766353db2			No_DR	No_DR	No_DR
e3b47ed5b511			No_DR	No_DR	No_DR
e3cd96cb094c			No_DR	No_DR	No_DR
e42d9a94a66d			No_DR	No_DR	No_DR
e47452069ea1			No_DR	No_DR	No_DR
e47770a2e5d1			No_DR	No_DR	No_DR
e4a44f9158dc			No_DR	No_DR	No_DR
e4ae1ee6aada			No_DR	No_DR	No_DR
e4b0df29b96f			No_DR	No_DR	No_DR
e4c799738a19			No_DR	No_DR	No_DR
e4d3d437b0a8			No_DR	No_DR	No_DR
e4dcca36ceb4			No_DR	No_DR	No_DR
e50b0174690d			No_DR	No_DR	No_DR
e5197d77ec68			No_DR	No_DR	No_DR
e529c5757d64			No_DR	No_DR	No_DR
e582e56e7942			No_DR	No_DR	No_DR
e594c19e2e1d			No_DR	No_DR	No_DR
e59c5f345bb0			No_DR	No_DR	No_DR
e5de79795c1d			No_DR	No_DR	No_DR
e5f332efcbc7			No_DR	No_DR	No_DR
e5f73f2855c0			No_DR	No_DR	No_DR
e60e4edb3ca9			No_DR	No_DR	No_DR
e632e38fd2d4			No_DR	No_DR	No_DR
e6552b7432b3			No_DR	No_DR	No_DR
e66855a5c583			No_DR	No_DR	No_DR
e66ad813a508			No_DR	No_DR	No_DR
e68746d426b2			No_DR	No_DR	No_DR
e68bdd36e589			No_DR	No_DR	No_DR
e69b48516577			No_DR	No_DR	No_DR
e6a5e4718873			No_DR	No_DR	No_DR
e7291472109b			No_DR	No_DR	No_DR
e7578d8dba72			No_DR	No_DR	No_DR
e77a93c3d9a9			No_DR	No_DR	No_DR
e79e10907295			No_DR	No_DR	No_DR
e7b5dd5bab1f			No_DR	No_DR	No_DR
e81f4a2fbbdc			No_DR	No_DR	No_DR
e82232a3c28b			No_DR	No_DR	No_DR
e893e86dde94			No_DR	No_DR	No_DR
e8ddfc9709ce			No_DR	No_DR	No_DR
e8e44b3160e3			No_DR	No_DR	No_DR
e907d23cce3d			No_DR	No_DR	No_DR
e933923aab15			No_DR	No_DR	No_DR
e966850247f4			No_DR	No_DR	No_DR
e9678824215d			No_DR	No_DR	No_DR
e97ecf4355cb			No_DR	No_DR	No_DR
e9ce5bf645ab			No_DR	No_DR	No_DR
e9f3c85a2a02			No_DR	No_DR	No_DR
e9faf0296643			No_DR	No_DR	No_DR
ea4ce9516144			No_DR	No_DR	No_DR
ea5c42a78979			No_DR	No_DR	No_DR
ea68b58a6e8f			No_DR	No_DR	No_DR
ea6a53e54d0f			No_DR	No_DR	No_DR
ea7e21bab610			No_DR	No_DR	No_DR
ea9c41e1ced0			No_DR	No_DR	No_DR
eabc7c716255			No_DR	No_DR	No_DR
eabf421f94d0			No_DR	No_DR	No_DR
eae70f527755			No_DR	No_DR	No_DR
eb050765b323			No_DR	No_DR	No_DR
eb175669d789			No_DR	No_DR	No_DR
eb6b1f1c09db			No_DR	Moderate	Moderate
ebd96d853918			No_DR	No_DR	No_DR
ebf4b22240f4			No_DR	No_DR	No_DR
ec01f0862669			No_DR	No_DR	No_DR
ec0c9f817b03			No_DR	No_DR	No_DR
ec363f48867b			No_DR	No_DR	No_DR
ec57cc20d776			No_DR	No_DR	No_DR
ec6659926105			No_DR	No_DR	No_DR
ec6f1797a25a			No_DR	No_DR	No_DR
ecad6845f630			No_DR	No_DR	No_DR
ecb4500285ed			No_DR	No_DR	No_DR
ed2c52c14493			No_DR	No_DR	No_DR
ed2ef440d22c			No_DR	No_DR	No_DR
ed3ce1674761			No_DR	No_DR	No_DR
ed648b9bcd95			No_DR	No_DR	No_DR
ed6bd9293a89			No_DR	No_DR	No_DR
eda1d75cbcf0			No_DR	No_DR	No_DR
eda29a9d78f3			No_DR	No_DR	No_DR
edceb0657d77			No_DR	No_DR	No_DR
ee36ca728641			No_DR	No_DR	No_DR
ee3f5cf52188			No_DR	No_DR	No_DR
ee3fe7809e6a			No_DR	No_DR	No_DR
ee77763a6afb			No_DR	No_DR	No_DR
eeaea2c5ff34			No_DR	No_DR	No_DR
eebd1e195952			No_DR	No_DR	No_DR
eedae6b28f96			No_DR	No_DR	No_DR
ef247f28004f			No_DR	No_DR	No_DR
ef4121e9bb67			No_DR	No_DR	No_DR
ef476be214d4			No_DR	No_DR	No_DR
ef48780f5d5f			No_DR	No_DR	No_DR
ef5155990874			No_DR	No_DR	No_DR
ef7eb85b75fc			No_DR	No_DR	No_DR
ef81cd8854cb			No_DR	No_DR	No_DR
ef8c39eb9157			No_DR	No_DR	No_DR
ef99c499d665			No_DR	No_DR	No_DR
f002ce614c59			No_DR	No_DR	No_DR
f00ce9b9d6f4			No_DR	No_DR	No_DR
f02057c41256			No_DR	No_DR	No_DR
f0267c42907c			No_DR	No_DR	No_DR
f02956bd7c50			No_DR	No_DR	No_DR
f02babb3a023			No_DR	No_DR	No_DR
f0546a45ef10			No_DR	No_DR	No_DR
f066db7a2efe			No_DR	Mild	Mild
f06e7a9df795			No_DR	No_DR	No_DR
f0860c21533b			No_DR	No_DR	No_DR
f09cfc6a4dbd			No_DR	No_DR	No_DR
f09fd9433dff			No_DR	No_DR	No_DR
f0a2dc580009			No_DR	No_DR	No_DR
f0e1201b5c1f			No_DR	No_DR	No_DR
f1979147aad4			No_DR	No_DR	No_DR
f1d719c97838			No_DR	No_DR	No_DR
f233638e0e90			No_DR	No_DR	No_DR
f252046c0fe6			No_DR	No_DR	No_DR
f26b02ead915			No_DR	No_DR	No_DR
f298b7d05958			No_DR	No_DR	No_DR
f2c0b41acd05			No_DR	No_DR	No_DR
f2f569a64949			No_DR	No_DR	No_DR
f35d80bb1a22			No_DR	No_DR	No_DR
f361060eda3e			No_DR	No_DR	No_DR
f366fb1cc475			No_DR	No_DR	No_DR
f36cb007a1ef			No_DR	No_DR	No_DR
f3a4751af42e			No_DR	No_DR	No_DR
f3b27ac2d371			No_DR	No_DR	No_DR
f3bb996b45ce			No_DR	No_DR	No_DR
f42b693a9414			No_DR	No_DR	No_DR
f431f2e119d7			No_DR	No_DR	No_DR
f451eee2b66b			No_DR	No_DR	No_DR
f48241b0c995			No_DR	No_DR	No_DR
f4874247ede6			No_DR	No_DR	No_DR
f4c7ae514c54			No_DR	No_DR	No_DR
f4d3169b468a			No_DR	No_DR	No_DR
f4de9620e3f2			No_DR	No_DR	No_DR
f4df3d86688d			No_DR	No_DR	No_DR
f4e68b61f480			No_DR	No_DR	No_DR
f4ea2a2cfbb9			No_DR	No_DR	No_DR
f531232ecb55			No_DR	No_DR	No_DR
f56ff0440ed1			No_DR	No_DR	No_DR
f5733f77273d			No_DR	No_DR	No_DR
f57cf3b6f48e			No_DR	No_DR	No_DR
f580566e27f5			No_DR	No_DR	No_DR
f58cdfa968be			No_DR	No_DR	No_DR
f58f0b2fd718			No_DR	No_DR	No_DR
f5c953bee7cd			No_DR	No_DR	No_DR
f62b8a076833			No_DR	No_DR	No_DR
f633c474e8b8			No_DR	No_DR	No_DR
f64b6e85f1c9			No_DR	No_DR	No_DR
f66c4ee86629			No_DR	No_DR	No_DR
f68690db78d3			No_DR	No_DR	No_DR
f6d760566a51			No_DR	No_DR	No_DR
f7116e7b2f4e			No_DR	No_DR	No_DR
f71333204618			No_DR	No_DR	No_DR
f71aca5a7dc3			No_DR	No_DR	No_DR
f71bea807c96			No_DR	No_DR	No_DR
f7508f14dd7b			No_DR	No_DR	No_DR
f7735b6d47f7			No_DR	No_DR	No_DR
f7defe70afc3			No_DR	No_DR	No_DR
f7e9fa75c7c1			No_DR	No_DR	No_DR
f819c65b803c			No_DR	No_DR	No_DR
f85c78201a50			No_DR	No_DR	No_DR
f85fd4fac887			No_DR	No_DR	No_DR
f86d1c404acb			No_DR	No_DR	No_DR
f8d62557ad0c			No_DR	No_DR	No_DR
f8f5942b690e			No_DR	No_DR	No_DR
f90f8931a9bc			No_DR	No_DR	No_DR
f91cfa82b9d4			No_DR	No_DR	No_DR
f952ad2e4356			No_DR	No_DR	No_DR
f994a3b07935			No_DR	No_DR	No_DR
f9d52509c571			No_DR	No_DR	No_DR
f9d8ff3e6592			No_DR	No_DR	No_DR
f9e1c439d4c8			No_DR	No_DR	No_DR
fa0c87bd75ce			No_DR	No_DR	No_DR
fa573163dd8b			No_DR	No_DR	No_DR
fa6f3d8bb1d5			No_DR	No_DR	No_DR
fa7fa797c650			No_DR	No_DR	No_DR
fa9bece586fc			No_DR	No_DR	No_DR
fa9f1bc03f21			No_DR	No_DR	No_DR
fb1b8771c70a			No_DR	No_DR	No_DR
fb767cea406c			No_DR	No_DR	No_DR
fb88783de055			No_DR	No_DR	No_DR
fb88d23fc5fe			No_DR	No_DR	No_DR
fbcbc81cf9be			No_DR	No_DR	No_DR
fbdc796290d4			No_DR	No_DR	No_DR
fbfa925506f6			No_DR	No_DR	No_DR
fc782722a50c			No_DR	No_DR	No_DR
fc898dfeb24f			No_DR	No_DR	No_DR
fc8fce67fbf8			No_DR	No_DR	No_DR
fca1a8738b8a			No_DR	No_DR	No_DR
fcc32dffd24d			No_DR	No_DR	No_DR
fce73678f650			No_DR	No_DR	No_DR
fd079d2e93a2			No_DR	No_DR	No_DR
fd0a70082e7c			No_DR	No_DR	No_DR
fd4c946c52bf			No_DR	No_DR	No_DR
fd87b6b2e664			No_DR	No_DR	No_DR
fdbc252813b1			No_DR	No_DR	No_DR
fdc685055659			No_DR	No_DR	No_DR
fe06dad6851c			No_DR	No_DR	No_DR
fe0e2dee1834			No_DR	No_DR	No_DR
fe3b0e50be78			No_DR	No_DR	No_DR
fe3f62695b2d			No_DR	No_DR	No_DR
febfb20dc311			No_DR	No_DR	No_DR
fed5bb685832			No_DR	No_DR	No_DR
fefded6bf135			No_DR	No_DR	No_DR
ff03f74667df			No_DR	No_DR	No_DR
ff1e940105f9			No_DR	No_DR	No_DR
ff4832d55461			No_DR	No_DR	No_DR
ff4955e76894			No_DR	Mild	Mild
ff4cd992667b			No_DR	No_DR	No_DR
ff59d44a70a7			No_DR	No_DR	No_DR
ff631653374e			No_DR	No_DR	No_DR
ffc04fed30e6			No_DR	No_DR	No_DR
ffd97f8cd5aa			No_DR	No_DR	No_DR
cf1b9d26d38d			Proliferate_DR	Proliferate_DR	Proliferate_DR
d0b132d2c7ec			Proliferate_DR	Proliferate_DR	Proliferate_DR
d10ef306996b			Proliferate_DR	Proliferate_DR	Proliferate_DR
d1a24527a15d			Proliferate_DR	Mild	Mild
d271d3a2b552			Proliferate_DR	Proliferate_DR	Proliferate_DR
d2901144070c			Proliferate_DR	Proliferate_DR	Proliferate_DR
d2c2f02bb313			Proliferate_DR	Moderate	Moderate
d48178e4a49b			Proliferate_DR	Mild	Mild
d51b3fe0fa1b			Proliferate_DR	Proliferate_DR	Proliferate_DR
d659d7fd5ccf			Proliferate_DR	Proliferate_DR	Proliferate_DR
d803598dabda			Proliferate_DR	Moderate	Moderate
d85ea1220a03			Proliferate_DR	No_DR	No_DR
d9ba044671e1			Proliferate_DR	Moderate	Moderate
dad71ba27a9b			Proliferate_DR	Proliferate_DR	Proliferate_DR
de16416220de			Proliferate_DR	Proliferate_DR	Proliferate_DR
df4913ca3712			Proliferate_DR	Proliferate_DR	Proliferate_DR
df4aec4a0eaf			Proliferate_DR	Proliferate_DR	Proliferate_DR
df84e7113003			Proliferate_DR	Moderate	Moderate
e019b3e0f33d			Proliferate_DR	Proliferate_DR	Proliferate_DR
e037643244b7			Proliferate_DR	Proliferate_DR	Proliferate_DR
e23add229074			Proliferate_DR	Moderate	Moderate
e32dc722eca5			Proliferate_DR	Proliferate_DR	Proliferate_DR
e39b627cf648			Proliferate_DR	Moderate	Moderate
e3ab63dc9a60			Proliferate_DR	Mild	Mild
e3ec668f6fad			Proliferate_DR	Proliferate_DR	Proliferate_DR
e4730ddde408			Proliferate_DR	Moderate	Moderate
e4f12411fd85			Proliferate_DR	Proliferate_DR	Proliferate_DR
e62490b7d0e9			Proliferate_DR	Proliferate_DR	Proliferate_DR
e740af6ac6ea			Proliferate_DR	Moderate	Moderate
e7d2c2c3b30f			Proliferate_DR	Moderate	Moderate
e821c1b6417a			Proliferate_DR	Proliferate_DR	Proliferate_DR
e9ab8413e771			Proliferate_DR	No_DR	No_DR
eaa0dfbd5024			Proliferate_DR	Proliferate_DR	Proliferate_DR
eadc57064154			Proliferate_DR	No_DR	No_DR
eb1d37b71fd1			Proliferate_DR	Proliferate_DR	Proliferate_DR
ebe0175e530c			Proliferate_DR	Proliferate_DR	Proliferate_DR
ed246ae1ed08			Proliferate_DR	Proliferate_DR	Proliferate_DR
ed3a0fc5b546			Proliferate_DR	Proliferate_DR	Proliferate_DR
ee1ec90b980f			Proliferate_DR	Mild	Mild
ef26625121b3			Proliferate_DR	Proliferate_DR	Proliferate_DR
f0098e9d4aee			Proliferate_DR	Proliferate_DR	Proliferate_DR
f025f33b2c9b			Proliferate_DR	Proliferate_DR	Proliferate_DR
f03d3c4ce7fb			Proliferate_DR	Moderate	Moderate
f0f89314e860			Proliferate_DR	Severe	Severe
f1dc26c4bfa3			Proliferate_DR	Proliferate_DR	Proliferate_DR
f2d2a0c92034			Proliferate_DR	Proliferate_DR	Proliferate_DR
f549294e12e1			Proliferate_DR	Proliferate_DR	Proliferate_DR
f58d37d48e42			Proliferate_DR	Proliferate_DR	Proliferate_DR
f5e6226bd2e0			Proliferate_DR	Mild	Mild
f69835dc7c50			Proliferate_DR	Moderate	Moderate
f6f3ea0d2693			Proliferate_DR	Proliferate_DR	Proliferate_DR
f72adcac5638			Proliferate_DR	Proliferate_DR	Proliferate_DR
f850cb51fdba			Proliferate_DR	Proliferate_DR	Proliferate_DR
f8cf7ed8ef00			Proliferate_DR	Proliferate_DR	Proliferate_DR
fa59221cf464			Proliferate_DR	Proliferate_DR	Proliferate_DR
fb696a8e055a			Proliferate_DR	Proliferate_DR	Proliferate_DR
fce93caa4758			Proliferate_DR	Proliferate_DR	Proliferate_DR
fdd534271f3d			Proliferate_DR	Moderate	Moderate
ff8a0b45c789			Proliferate_DR	Proliferate_DR	Proliferate_DR
c5ba9e455d5e			Severe	Moderate	Moderate
c67117c6ab3b			Severe	Moderate	Moderate
c76664770c07			Severe	Moderate	Moderate
c9ea9d5eab65			Severe	Moderate	Moderate
ce207b69ff37			Severe	Moderate	Moderate
d0079cc188e9			Severe	Moderate	Moderate
d035c2bd9104			Severe	Severe	Severe
d0ffa0425ef1			Severe	Moderate	Moderate
d16398c971e9			Severe	Severe	Severe
d2ffe9287dc7			Severe	Moderate	Moderate
d3e884109b45			Severe	Severe	Severe
d868acdccb5b			Severe	Severe	Severe
dbb2c63f6f08			Severe	Moderate	Moderate
dbfd238b3468			Severe	Severe	Severe
dd3dad6ca78f			Severe	Severe	Severe
e0b5a982a018			Severe	Severe	Severe
e13412678eff			Severe	Severe	Severe
e1900014dabf			Severe	Mild	Mild
e19936582c61			Severe	Moderate	Moderate
e1fb532f55df			Severe	Severe	Severe
e32a359be36d			Severe	Severe	Severe
e4210e7fe587			Severe	Severe	Severe
e52ed5c29c5e			Severe	Moderate	Moderate
e76a9cbb2a8c			Severe	Severe	Severe
e8d1c6c07cf2			Severe	Moderate	Moderate
e93394175a19			Severe	Severe	Severe
ed6704e3b72e			Severe	Severe	Severe
f080a22008be			Severe	Severe	Severe
f092febbf5c0			Severe	Moderate	Moderate
f576e45d1da2			Severe	Moderate	Moderate
f5a8c6426a71			Severe	Moderate	Moderate
f64214bed40e			Severe	No_DR	No_DR
f6f433f3306f			Severe	Severe	Severe
f901d460517c			Severe	Proliferate_DR	Proliferate_DR
f9156aeffc5e			Severe	Severe	Severe
fb61230b99dd			Severe	Proliferate_DR	Proliferate_DR
fcc6aa6755e6			Severe	Proliferate_DR	Proliferate_DR
fda39982a810			Severe	Moderate	Moderate
fe0fc67c7980			Severe	Moderate	Moderate

## Sheet: Mild_Alexnet_Densenet
		Activation Maps Consensus		Network 1	Network 2
Immagine	Immagine	Gradcam-Consensus	True_Label	Alexnet_Scratch	Densenet_Scratch	Predict_Consensus	Penalty	Trustability
c739ff9580d3	c739ff9580d3	0.336319	Mild	Moderate	Moderate	1	1	-0.663681
c7b622ec8104	c7b622ec8104	0.361887	Mild	Mild	Moderate	0	1	-0.638113
c8fc0df22999	c8fc0df22999	0.317615	Mild	Mild	Mild	1	0	0.317615
c9485c38fdd5	c9485c38fdd5	0.645981	Mild	Mild	Moderate	0	1	-0.354019
c96f743915b5	c96f743915b5	0.649976	Mild	Mild	Moderate	0	1	-0.350024
ca1036496659	ca1036496659	0.368299	Mild	Mild	Moderate	0	1	-0.631701
ca25745942b0	ca25745942b0	0.656175	Mild	Mild	Mild	1	0	0.656175
ca30a97e9d13	ca30a97e9d13	0.332605	Mild	Mild	Mild	1	0	0.332605
ca63fe4f4b52	ca63fe4f4b52	0.560948	Mild	Mild	Mild	1	0	0.560948
ca6842bfcbc9	ca6842bfcbc9	0.565964	Mild	Mild	Mild	1	0	0.565964
ca7140ecf389	ca7140ecf389	0.382979	Mild	Moderate	Severe	0	1	-0.617021
cab3dfa7962d	cab3dfa7962d	0.517005	Mild	Mild	Moderate	0	1	-0.482995
cae51154e1ce	cae51154e1ce	0.295149	Mild	No_DR	No_DR	1	1	-0.704851
cb2f3c5d71a7	cb2f3c5d71a7	0.77746	Mild	No_DR	No_DR	1	1	-0.22254
cc12453ea915	cc12453ea915	0.519161	Mild	Mild	Mild	1	0	0.519161
cc9270f06b65	cc9270f06b65	0.518915	Mild	Mild	Mild	1	0	0.518915
cd45bfa07d41	cd45bfa07d41	0.548559	Mild	Moderate	Moderate	1	1	-0.451441
cd5714db652d	cd5714db652d	0.509679	Mild	Mild	Severe	0	1	-0.490321
cf0575534cec	cf0575534cec	0.244936	Mild	Moderate	Moderate	1	1	-0.755064
cf603a9ef2d5	cf603a9ef2d5	0.320171	Mild	Mild	Severe	0	1	-0.679829
cfd1bd0fcbb4	cfd1bd0fcbb4	0.200671	Mild	No_DR	No_DR	1	1	-0.799329
d06ccd0cf4b8	d06ccd0cf4b8	0.121768	Mild	No_DR	Moderate	0	1	-0.878232
d0d59ed675b5	d0d59ed675b5	0.582834	Mild	Mild	Mild	1	0	0.582834
d1cad012a254	d1cad012a254	0.696715	Mild	Mild	Mild	1	0	0.696715
d3de0d313d61	d3de0d313d61	0.473958	Mild	No_DR	No_DR	1	1	-0.526042
d4f32b9c07df	d4f32b9c07df	0.610577	Mild	Moderate	Moderate	1	1	-0.389423
d567a1a22d33	d567a1a22d33	0.684502	Mild	Mild	Mild	1	0	0.684502
d5b4705ac2ee	d5b4705ac2ee	0.796589	Mild	No_DR	No_DR	1	1	-0.203411
d66b6f333dc7	d66b6f333dc7	0.639727	Mild	Moderate	Moderate	1	1	-0.360273
d66ccb75ada1	d66ccb75ada1	0.33144	Mild	Mild	Mild	1	0	0.33144
d6e26fe51dce	d6e26fe51dce	0.481123	Mild	Moderate	Proliferate_DR	0	1	-0.518877
d801c0a66738	d801c0a66738	0.594025	Mild	Moderate	Moderate	1	1	-0.405975
d85588ff2ebd	d85588ff2ebd	0.385646	Mild	Mild	Moderate	0	1	-0.614354
d85d052900b4	d85d052900b4	0.659864	Mild	Mild	Mild	1	0	0.659864
da1fb35f5df9	da1fb35f5df9	0.468299	Mild	Mild	Mild	1	0	0.468299
db4ed1e07aa3	db4ed1e07aa3	0.722885	Mild	Mild	Mild	1	0	0.722885
db690e2d02f8	db690e2d02f8	0.478999	Mild	Mild	No_DR	0	1	-0.521001
dbd062558b81	dbd062558b81	0.533777	Mild	Mild	Moderate	0	1	-0.466223
dd19428c3d29	dd19428c3d29	0.560611	Mild	Mild	Mild	1	0	0.560611
e07045d7c5f7	e07045d7c5f7	0.562385	Mild	Mild	Mild	1	0	0.562385
e25ccfe38e44	e25ccfe38e44	0.277837	Mild	No_DR	No_DR	1	1	-0.722163
e26d8718ca58	e26d8718ca58	0.284527	Mild	No_DR	No_DR	1	1	-0.715473
e2a233493b90	e2a233493b90	0.312206	Mild	Mild	Moderate	0	1	-0.687794
e38f3a65b02b	e38f3a65b02b	0.253215	Mild	Proliferate_DR	Proliferate_DR	1	1	-0.746785
e55188915f9d	e55188915f9d	0.609077	Mild	Mild	Mild	1	0	0.609077
e580676516b0	e580676516b0	0.545814	Mild	No_DR	Mild	0	1	-0.454186
e9286ddf6ffe	e9286ddf6ffe	0.319766	Mild	Proliferate_DR	Moderate	0	1	-0.680234
e96bd80a8a53	e96bd80a8a53	0.479711	Mild	Mild	Mild	1	0	0.479711
e9ff9352ccb3	e9ff9352ccb3	0.277267	Mild	Mild	Mild	1	0	0.277267
ea15a290eb96	ea15a290eb96	0.19232	Mild	No_DR	No_DR	1	1	-0.80768
ead23cc922ed	ead23cc922ed	0.684659	Mild	Mild	Mild	1	0	0.684659
eba3acc42197	eba3acc42197	0.594437	Mild	Moderate	Moderate	1	1	-0.405563
ec4649213ccf	ec4649213ccf	0.681615	Mild	Mild	Mild	1	0	0.681615
ee78ce914066	ee78ce914066	0.849749	Mild	Mild	Severe	0	1	-0.150251
eeb231c3ef1f	eeb231c3ef1f	0.773718	Mild	Mild	Mild	1	0	0.773718
eed4afc8ec83	eed4afc8ec83	0.78581	Mild	No_DR	No_DR	1	1	-0.21419
ef8109305128	ef8109305128	0.503402	Mild	Mild	Severe	0	1	-0.496598
f0c13be90519	f0c13be90519	0.350611	Mild	Moderate	No_DR	0	1	-0.649389
f47a2a4a0411	f47a2a4a0411	0.403828	Mild	Moderate	Moderate	1	1	-0.596172
f481f76a6b75	f481f76a6b75	0.363679	Mild	Mild	Mild	1	0	0.363679
f55e1d2a19e4	f55e1d2a19e4	0.479169	Mild	Mild	Mild	1	0	0.479169
f5650eb52640	f5650eb52640	0.652499	Mild	Mild	Mild	1	0	0.652499
f6f7dba7104d	f6f7dba7104d	0.516472	Mild	Mild	Mild	1	0	0.516472
f72ef9ceeaa8	f72ef9ceeaa8	0.495697	Mild	No_DR	Proliferate_DR	0	1	-0.504303
f762c272c522	f762c272c522	0.407491	Mild	Mild	Mild	1	0	0.407491
f7fec8935126	f7fec8935126	0.732299	Mild	Mild	Mild	1	0	0.732299
fb6b8200b7f8	fb6b8200b7f8	0.512424	Mild	Mild	Moderate	0	1	-0.487576
fca931da5c5e	fca931da5c5e	0.587375	Mild	Mild	Mild	1	0	0.587375
fd62bd0db4f1	fd62bd0db4f1	0.340151	Mild	No_DR	No_DR	1	1	-0.659849
fdd18ccbbdc5	fdd18ccbbdc5	0.267173	Mild	Moderate	Moderate	1	1	-0.732827
fe2df69676cf	fe2df69676cf	0.450879	Mild	Mild	Mild	1	0	0.450879
fe674c2f73f5	fe674c2f73f5	0.373446	Mild	Mild	Mild	1	0	0.373446
fea14b3d44b0	fea14b3d44b0	0.715819	Mild	Mild	Mild	1	0	0.715819
fecf4c5ae84b	fecf4c5ae84b	0.634952	Mild	Mild	Proliferate_DR	0	1	-0.365048
						52	42	-5.27473

## Sheet: Mild_Alexnet_Efficientnetb0
		Activation Maps Consensus		Network 1	Network 2
Immagine	Immagine	Gradcam-Consensus	True_Label	Alexnet_Scratch	Densenet_Scratch	Predict_Consensus	Penalty	Trustability
c739ff9580d3	c739ff9580d3	0.218384	Mild	Moderate	Mild	0	1	-0.781616
c7b622ec8104	c7b622ec8104	0.334777	Mild	Mild	Mild	1	0	0.334777
c8fc0df22999	c8fc0df22999	0.642338	Mild	Mild	Moderate	0	1	-0.357662
c9485c38fdd5	c9485c38fdd5	0.391533	Mild	Mild	Moderate	0	1	-0.608467
c96f743915b5	c96f743915b5	0.716944	Mild	Mild	Mild	1	0	0.716944
ca1036496659	ca1036496659	0.239459	Mild	Mild	Mild	1	0	0.239459
ca25745942b0	ca25745942b0	0.317932	Mild	Mild	Mild	1	0	0.317932
ca30a97e9d13	ca30a97e9d13	0.633345	Mild	Mild	Mild	1	0	0.633345
ca63fe4f4b52	ca63fe4f4b52	0.480554	Mild	Mild	Mild	1	0	0.480554
ca6842bfcbc9	ca6842bfcbc9	0.521368	Mild	Mild	Mild	1	0	0.521368
ca7140ecf389	ca7140ecf389	0.419883	Mild	Moderate	Moderate	1	1	-0.580117
cab3dfa7962d	cab3dfa7962d	0.644536	Mild	Mild	Moderate	0	1	-0.355464
cae51154e1ce	cae51154e1ce	0.084881	Mild	No_DR	Moderate	0	1	-0.915119
cb2f3c5d71a7	cb2f3c5d71a7	0.782323	Mild	No_DR	Moderate	0	1	-0.217677
cc12453ea915	cc12453ea915	0.437464	Mild	Mild	Mild	1	0	0.437464
cc9270f06b65	cc9270f06b65	0.476008	Mild	Mild	Mild	1	0	0.476008
cd45bfa07d41	cd45bfa07d41	0.510484	Mild	Moderate	Moderate	1	1	-0.489516
cd5714db652d	cd5714db652d	0.461686	Mild	Mild	Mild	1	0	0.461686
cf0575534cec	cf0575534cec	0.326237	Mild	Moderate	Moderate	1	1	-0.673763
cf603a9ef2d5	cf603a9ef2d5	0.344662	Mild	Mild	Mild	1	0	0.344662
cfd1bd0fcbb4	cfd1bd0fcbb4	0.054802	Mild	No_DR	Moderate	0	1	-0.945198
d06ccd0cf4b8	d06ccd0cf4b8	0.170577	Mild	No_DR	Mild	0	1	-0.829423
d0d59ed675b5	d0d59ed675b5	0.550806	Mild	Mild	Mild	1	0	0.550806
d1cad012a254	d1cad012a254	0.612684	Mild	Mild	Mild	1	0	0.612684
d3de0d313d61	d3de0d313d61	0.420887	Mild	No_DR	Moderate	0	1	-0.579113
d4f32b9c07df	d4f32b9c07df	0.501847	Mild	Moderate	Moderate	1	1	-0.498153
d567a1a22d33	d567a1a22d33	0.541848	Mild	Mild	Mild	1	0	0.541848
d5b4705ac2ee	d5b4705ac2ee	0.730003	Mild	No_DR	No_DR	1	1	-0.269997
d66b6f333dc7	d66b6f333dc7	0.440539	Mild	Moderate	Moderate	1	1	-0.559461
d66ccb75ada1	d66ccb75ada1	0.805332	Mild	Mild	Moderate	0	1	-0.194668
d6e26fe51dce	d6e26fe51dce	0.496596	Mild	Moderate	Moderate	1	1	-0.503404
d801c0a66738	d801c0a66738	0.71493	Mild	Moderate	Moderate	1	1	-0.28507
d85588ff2ebd	d85588ff2ebd	0.623012	Mild	Mild	Mild	1	0	0.623012
d85d052900b4	d85d052900b4	0.493154	Mild	Mild	Mild	1	0	0.493154
da1fb35f5df9	da1fb35f5df9	0.592301	Mild	Mild	Mild	1	0	0.592301
db4ed1e07aa3	db4ed1e07aa3	0.502642	Mild	Mild	Mild	1	0	0.502642
db690e2d02f8	db690e2d02f8	0.668918	Mild	Mild	No_DR	0	1	-0.331082
dbd062558b81	dbd062558b81	0.37802	Mild	Mild	Mild	1	0	0.37802
dd19428c3d29	dd19428c3d29	0.610312	Mild	Mild	Mild	1	0	0.610312
e07045d7c5f7	e07045d7c5f7	0.612199	Mild	Mild	Mild	1	0	0.612199
e25ccfe38e44	e25ccfe38e44	0.147504	Mild	No_DR	No_DR	1	1	-0.852496
e26d8718ca58	e26d8718ca58	0.430045	Mild	No_DR	No_DR	1	1	-0.569955
e2a233493b90	e2a233493b90	0.501818	Mild	Mild	Mild	1	0	0.501818
e38f3a65b02b	e38f3a65b02b	0.141323	Mild	Proliferate_DR	Mild	0	1	-0.858677
e55188915f9d	e55188915f9d	0.668773	Mild	Mild	Moderate	0	1	-0.331227
e580676516b0	e580676516b0	0.531152	Mild	No_DR	Moderate	0	1	-0.468848
e9286ddf6ffe	e9286ddf6ffe	0.219112	Mild	Proliferate_DR	Moderate	0	1	-0.780888
e96bd80a8a53	e96bd80a8a53	0.493991	Mild	Mild	Mild	1	0	0.493991
e9ff9352ccb3	e9ff9352ccb3	0.582733	Mild	Mild	Mild	1	0	0.582733
ea15a290eb96	ea15a290eb96	0.357027	Mild	No_DR	No_DR	1	1	-0.642973
ead23cc922ed	ead23cc922ed	0.612483	Mild	Mild	Mild	1	0	0.612483
eba3acc42197	eba3acc42197	0.393448	Mild	Moderate	Moderate	1	1	-0.606552
ec4649213ccf	ec4649213ccf	0.662128	Mild	Mild	Mild	1	0	0.662128
ee78ce914066	ee78ce914066	0.653132	Mild	Mild	Mild	1	0	0.653132
eeb231c3ef1f	eeb231c3ef1f	0.823062	Mild	Mild	Moderate	0	1	-0.176938
eed4afc8ec83	eed4afc8ec83	0.803631	Mild	No_DR	No_DR	1	1	-0.196369
ef8109305128	ef8109305128	0.566539	Mild	Mild	Moderate	0	1	-0.433461
f0c13be90519	f0c13be90519	0.143954	Mild	Moderate	Mild	0	1	-0.856046
f47a2a4a0411	f47a2a4a0411	0.315161	Mild	Moderate	Moderate	1	1	-0.684839
f481f76a6b75	f481f76a6b75	0.361804	Mild	Mild	Mild	1	0	0.361804
f55e1d2a19e4	f55e1d2a19e4	0.474783	Mild	Mild	Moderate	0	1	-0.525217
f5650eb52640	f5650eb52640	0.626824	Mild	Mild	Mild	1	0	0.626824
f6f7dba7104d	f6f7dba7104d	0.727167	Mild	Mild	Mild	1	0	0.727167
f72ef9ceeaa8	f72ef9ceeaa8	0.286847	Mild	No_DR	Mild	0	1	-0.713153
f762c272c522	f762c272c522	0.435007	Mild	Mild	Mild	1	0	0.435007
f7fec8935126	f7fec8935126	0.723641	Mild	Mild	Moderate	0	1	-0.276359
fb6b8200b7f8	fb6b8200b7f8	0.654367	Mild	Mild	Mild	1	0	0.654367
fca931da5c5e	fca931da5c5e	0.526038	Mild	Mild	Mild	1	0	0.526038
fd62bd0db4f1	fd62bd0db4f1	0.366934	Mild	No_DR	Mild	0	1	-0.633066
fdd18ccbbdc5	fdd18ccbbdc5	0.253843	Mild	Moderate	Mild	0	1	-0.746157
fe2df69676cf	fe2df69676cf	0.774211	Mild	Mild	Moderate	0	1	-0.225789
fe674c2f73f5	fe674c2f73f5	0.293247	Mild	Mild	Mild	1	0	0.293247
fea14b3d44b0	fea14b3d44b0	0.588324	Mild	Mild	Mild	1	0	0.588324
fecf4c5ae84b	fecf4c5ae84b	0.56796	Mild	Mild	Moderate	0	1	-0.43204
						49	39	-2.78578

## Sheet: Mild_Alexnet_Googlenet
		Activation Maps Consensus		Network 1	Network 2
Immagine	Immagine	Gradcam-Consensus	True_Label	Alexnet_Scratch	Densenet_Scratch	Predict_Consensus	Penalty	Trustability
c739ff9580d3	c739ff9580d3	0.362747	Mild	Moderate	Moderate	1	1	-0.637253
c7b622ec8104	c7b622ec8104	0.532744	Mild	Mild	Mild	1	0	0.532744
c8fc0df22999	c8fc0df22999	0.214784	Mild	Mild	Mild	1	0	0.214784
c9485c38fdd5	c9485c38fdd5	0.344312	Mild	Mild	Mild	1	0	0.344312
c96f743915b5	c96f743915b5	0.473361	Mild	Mild	Mild	1	0	0.473361
ca1036496659	ca1036496659	0.148755	Mild	Mild	No_DR	0	1	-0.851245
ca25745942b0	ca25745942b0	0.506573	Mild	Mild	Mild	1	0	0.506573
ca30a97e9d13	ca30a97e9d13	0.673404	Mild	Mild	No_DR	0	1	-0.326596
ca63fe4f4b52	ca63fe4f4b52	0.547639	Mild	Mild	Mild	1	0	0.547639
ca6842bfcbc9	ca6842bfcbc9	0.558259	Mild	Mild	Mild	1	0	0.558259
ca7140ecf389	ca7140ecf389	0.29749	Mild	Moderate	Mild	0	1	-0.70251
cab3dfa7962d	cab3dfa7962d	0.538111	Mild	Mild	Mild	1	0	0.538111
cae51154e1ce	cae51154e1ce	0.37271	Mild	No_DR	No_DR	1	1	-0.62729
cb2f3c5d71a7	cb2f3c5d71a7	0.672389	Mild	No_DR	No_DR	1	1	-0.327611
cc12453ea915	cc12453ea915	0.506728	Mild	Mild	Mild	1	0	0.506728
cc9270f06b65	cc9270f06b65	0.382	Mild	Mild	Mild	1	0	0.382
cd45bfa07d41	cd45bfa07d41	0.557689	Mild	Moderate	Mild	0	1	-0.442311
cd5714db652d	cd5714db652d	0.495641	Mild	Mild	Mild	1	0	0.495641
cf0575534cec	cf0575534cec	0.513074	Mild	Moderate	Moderate	1	1	-0.486926
cf603a9ef2d5	cf603a9ef2d5	0.52438	Mild	Mild	Mild	1	0	0.52438
cfd1bd0fcbb4	cfd1bd0fcbb4	0.118587	Mild	No_DR	No_DR	1	1	-0.881413
d06ccd0cf4b8	d06ccd0cf4b8	0.492362	Mild	No_DR	No_DR	1	1	-0.507638
d0d59ed675b5	d0d59ed675b5	0.517971	Mild	Mild	Mild	1	0	0.517971
d1cad012a254	d1cad012a254	0.333767	Mild	Mild	Mild	1	0	0.333767
d3de0d313d61	d3de0d313d61	0.128603	Mild	No_DR	No_DR	1	1	-0.871397
d4f32b9c07df	d4f32b9c07df	0.481878	Mild	Moderate	Moderate	1	1	-0.518122
d567a1a22d33	d567a1a22d33	0.535318	Mild	Mild	Mild	1	0	0.535318
d5b4705ac2ee	d5b4705ac2ee	0.729537	Mild	No_DR	No_DR	1	1	-0.270463
d66b6f333dc7	d66b6f333dc7	0.551066	Mild	Moderate	Mild	0	1	-0.448934
d66ccb75ada1	d66ccb75ada1	0.274724	Mild	Mild	Mild	1	0	0.274724
d6e26fe51dce	d6e26fe51dce	0.509607	Mild	Moderate	Mild	0	1	-0.490393
d801c0a66738	d801c0a66738	0.405572	Mild	Moderate	Mild	0	1	-0.594428
d85588ff2ebd	d85588ff2ebd	0.351006	Mild	Mild	Mild	1	0	0.351006
d85d052900b4	d85d052900b4	0.622269	Mild	Mild	Mild	1	0	0.622269
da1fb35f5df9	da1fb35f5df9	0.445249	Mild	Mild	No_DR	0	1	-0.554751
db4ed1e07aa3	db4ed1e07aa3	0.517156	Mild	Mild	Mild	1	0	0.517156
db690e2d02f8	db690e2d02f8	0.456831	Mild	Mild	No_DR	0	1	-0.543169
dbd062558b81	dbd062558b81	0.27035	Mild	Mild	Mild	1	0	0.27035
dd19428c3d29	dd19428c3d29	0.406682	Mild	Mild	No_DR	0	1	-0.593318
e07045d7c5f7	e07045d7c5f7	0.402124	Mild	Mild	Mild	1	0	0.402124
e25ccfe38e44	e25ccfe38e44	0.18985	Mild	No_DR	No_DR	1	1	-0.81015
e26d8718ca58	e26d8718ca58	0.247635	Mild	No_DR	No_DR	1	1	-0.752365
e2a233493b90	e2a233493b90	0.302805	Mild	Mild	No_DR	0	1	-0.697195
e38f3a65b02b	e38f3a65b02b	0	Mild	Proliferate_DR	Mild	0	1	-1
e55188915f9d	e55188915f9d	0.535822	Mild	Mild	No_DR	0	1	-0.464178
e580676516b0	e580676516b0	0.506502	Mild	No_DR	No_DR	1	1	-0.493498
e9286ddf6ffe	e9286ddf6ffe	0.601826	Mild	Proliferate_DR	Mild	0	1	-0.398174
e96bd80a8a53	e96bd80a8a53	0.681225	Mild	Mild	Mild	1	0	0.681225
e9ff9352ccb3	e9ff9352ccb3	0.101701	Mild	Mild	No_DR	0	1	-0.898299
ea15a290eb96	ea15a290eb96	0.181297	Mild	No_DR	No_DR	1	1	-0.818703
ead23cc922ed	ead23cc922ed	0.550725	Mild	Mild	Mild	1	0	0.550725
eba3acc42197	eba3acc42197	0.459075	Mild	Moderate	No_DR	0	1	-0.540925
ec4649213ccf	ec4649213ccf	0.346047	Mild	Mild	Mild	1	0	0.346047
ee78ce914066	ee78ce914066	0.152609	Mild	Mild	Mild	1	0	0.152609
eeb231c3ef1f	eeb231c3ef1f	0.6068	Mild	Mild	Mild	1	0	0.6068
eed4afc8ec83	eed4afc8ec83	0.624119	Mild	No_DR	No_DR	1	1	-0.375881
ef8109305128	ef8109305128	0.253257	Mild	Mild	Moderate	0	1	-0.746743
f0c13be90519	f0c13be90519	0.122688	Mild	Moderate	No_DR	0	1	-0.877312
f47a2a4a0411	f47a2a4a0411	0.436767	Mild	Moderate	Moderate	1	1	-0.563233
f481f76a6b75	f481f76a6b75	0.324431	Mild	Mild	Moderate	0	1	-0.675569
f55e1d2a19e4	f55e1d2a19e4	0.408356	Mild	Mild	Moderate	0	1	-0.591644
f5650eb52640	f5650eb52640	0.618792	Mild	Mild	Mild	1	0	0.618792
f6f7dba7104d	f6f7dba7104d	0.323957	Mild	Mild	Mild	1	0	0.323957
f72ef9ceeaa8	f72ef9ceeaa8	0.094272	Mild	No_DR	No_DR	1	1	-0.905728
f762c272c522	f762c272c522	0.369709	Mild	Mild	Mild	1	0	0.369709
f7fec8935126	f7fec8935126	0.37099	Mild	Mild	Mild	1	0	0.37099
fb6b8200b7f8	fb6b8200b7f8	0.326	Mild	Mild	Mild	1	0	0.326
fca931da5c5e	fca931da5c5e	0.463652	Mild	Mild	Mild	1	0	0.463652
fd62bd0db4f1	fd62bd0db4f1	0.258007	Mild	No_DR	No_DR	1	1	-0.741993
fdd18ccbbdc5	fdd18ccbbdc5	0.386556	Mild	Moderate	Moderate	1	1	-0.613444
fe2df69676cf	fe2df69676cf	0.424177	Mild	Mild	Mild	1	0	0.424177
fe674c2f73f5	fe674c2f73f5	0.518555	Mild	Mild	No_DR	0	1	-0.481445
fea14b3d44b0	fea14b3d44b0	0.519722	Mild	Mild	Mild	1	0	0.519722
fecf4c5ae84b	fecf4c5ae84b	0.709707	Mild	Mild	Mild	1	0	0.709707
						53	39	-8.20892

## Sheet: Mild_Alexnet_inceptionresnetv2
		Activation Maps Consensus		Network 1	Network 2
Immagine	Immagine	Gradcam-Consensus	True_Label	Alexnet_Scratch	Densenet_Scratch	Predict_Consensus	Penalty	Trustability
c739ff9580d3	c739ff9580d3	0.257487	Mild	Moderate	Mild	0	1	-0.742513
c7b622ec8104	c7b622ec8104	0.365945	Mild	Mild	Moderate	0	1	-0.634055
c8fc0df22999	c8fc0df22999	0.609416	Mild	Mild	Mild	1	0	0.609416
c9485c38fdd5	c9485c38fdd5	0.417408	Mild	Mild	Mild	1	0	0.417408
c96f743915b5	c96f743915b5	0.494136	Mild	Mild	Mild	1	0	0.494136
ca1036496659	ca1036496659	0.181023	Mild	Mild	Moderate	0	1	-0.818977
ca25745942b0	ca25745942b0	0.626805	Mild	Mild	Mild	1	0	0.626805
ca30a97e9d13	ca30a97e9d13	0.307256	Mild	Mild	Mild	1	0	0.307256
ca63fe4f4b52	ca63fe4f4b52	0.49673	Mild	Mild	Mild	1	0	0.49673
ca6842bfcbc9	ca6842bfcbc9	0.586237	Mild	Mild	Mild	1	0	0.586237
ca7140ecf389	ca7140ecf389	0.283424	Mild	Moderate	Mild	0	1	-0.716576
cab3dfa7962d	cab3dfa7962d	0.755697	Mild	Mild	Mild	1	0	0.755697
cae51154e1ce	cae51154e1ce	0.097025	Mild	No_DR	Moderate	0	1	-0.902975
cb2f3c5d71a7	cb2f3c5d71a7	0.695216	Mild	No_DR	No_DR	1	1	-0.304784
cc12453ea915	cc12453ea915	0.502057	Mild	Mild	Mild	1	0	0.502057
cc9270f06b65	cc9270f06b65	0.390358	Mild	Mild	Mild	1	0	0.390358
cd45bfa07d41	cd45bfa07d41	0.526754	Mild	Moderate	Proliferate_DR	0	1	-0.473246
cd5714db652d	cd5714db652d	0.535701	Mild	Mild	Mild	1	0	0.535701
cf0575534cec	cf0575534cec	0.252934	Mild	Moderate	Severe	0	1	-0.747066
cf603a9ef2d5	cf603a9ef2d5	0.306633	Mild	Mild	Mild	1	0	0.306633
cfd1bd0fcbb4	cfd1bd0fcbb4	0.201197	Mild	No_DR	Mild	0	1	-0.798803
d06ccd0cf4b8	d06ccd0cf4b8	0.219681	Mild	No_DR	No_DR	1	1	-0.780319
d0d59ed675b5	d0d59ed675b5	0.63874	Mild	Mild	Mild	1	0	0.63874
d1cad012a254	d1cad012a254	0.62492	Mild	Mild	Mild	1	0	0.62492
d3de0d313d61	d3de0d313d61	0.436837	Mild	No_DR	Mild	0	1	-0.563163
d4f32b9c07df	d4f32b9c07df	0.541082	Mild	Moderate	Mild	0	1	-0.458918
d567a1a22d33	d567a1a22d33	0.590086	Mild	Mild	Mild	1	0	0.590086
d5b4705ac2ee	d5b4705ac2ee	0.63897	Mild	No_DR	No_DR	1	1	-0.36103
d66b6f333dc7	d66b6f333dc7	0.463961	Mild	Moderate	Moderate	1	1	-0.536039
d66ccb75ada1	d66ccb75ada1	0.557689	Mild	Mild	Mild	1	0	0.557689
d6e26fe51dce	d6e26fe51dce	0.358914	Mild	Moderate	Moderate	1	1	-0.641086
d801c0a66738	d801c0a66738	0.622783	Mild	Moderate	Mild	0	1	-0.377217
d85588ff2ebd	d85588ff2ebd	0.518911	Mild	Mild	Mild	1	0	0.518911
d85d052900b4	d85d052900b4	0.669418	Mild	Mild	Mild	1	0	0.669418
da1fb35f5df9	da1fb35f5df9	0.479305	Mild	Mild	Mild	1	0	0.479305
db4ed1e07aa3	db4ed1e07aa3	0.698875	Mild	Mild	Mild	1	0	0.698875
db690e2d02f8	db690e2d02f8	0.543526	Mild	Mild	Mild	1	0	0.543526
dbd062558b81	dbd062558b81	0.468349	Mild	Mild	Moderate	0	1	-0.531651
dd19428c3d29	dd19428c3d29	0.594936	Mild	Mild	Mild	1	0	0.594936
e07045d7c5f7	e07045d7c5f7	0.590841	Mild	Mild	Mild	1	0	0.590841
e25ccfe38e44	e25ccfe38e44	0.250179	Mild	No_DR	No_DR	1	1	-0.749821
e26d8718ca58	e26d8718ca58	0.166027	Mild	No_DR	No_DR	1	1	-0.833973
e2a233493b90	e2a233493b90	0.616372	Mild	Mild	Mild	1	0	0.616372
e38f3a65b02b	e38f3a65b02b	0.273825	Mild	Proliferate_DR	Mild	0	1	-0.726175
e55188915f9d	e55188915f9d	0.611267	Mild	Mild	Mild	1	0	0.611267
e580676516b0	e580676516b0	0.502525	Mild	No_DR	No_DR	1	1	-0.497475
e9286ddf6ffe	e9286ddf6ffe	0.309639	Mild	Proliferate_DR	Moderate	0	1	-0.690361
e96bd80a8a53	e96bd80a8a53	0.553737	Mild	Mild	Mild	1	0	0.553737
e9ff9352ccb3	e9ff9352ccb3	0.368092	Mild	Mild	Mild	1	0	0.368092
ea15a290eb96	ea15a290eb96	0.50332	Mild	No_DR	No_DR	1	1	-0.49668
ead23cc922ed	ead23cc922ed	0.611038	Mild	Mild	Mild	1	0	0.611038
eba3acc42197	eba3acc42197	0.389056	Mild	Moderate	Moderate	1	1	-0.610944
ec4649213ccf	ec4649213ccf	0.421966	Mild	Mild	Mild	1	0	0.421966
ee78ce914066	ee78ce914066	0.577935	Mild	Mild	Mild	1	0	0.577935
eeb231c3ef1f	eeb231c3ef1f	0.745088	Mild	Mild	Mild	1	0	0.745088
eed4afc8ec83	eed4afc8ec83	0.640627	Mild	No_DR	Mild	0	1	-0.359373
ef8109305128	ef8109305128	0.437548	Mild	Mild	Moderate	0	1	-0.562452
f0c13be90519	f0c13be90519	0.045259	Mild	Moderate	Moderate	1	1	-0.954741
f47a2a4a0411	f47a2a4a0411	0.218566	Mild	Moderate	Moderate	1	1	-0.781434
f481f76a6b75	f481f76a6b75	0.253741	Mild	Mild	Moderate	0	1	-0.746259
f55e1d2a19e4	f55e1d2a19e4	0.415008	Mild	Mild	Mild	1	0	0.415008
f5650eb52640	f5650eb52640	0.591382	Mild	Mild	Mild	1	0	0.591382
f6f7dba7104d	f6f7dba7104d	0.53977	Mild	Mild	Mild	1	0	0.53977
f72ef9ceeaa8	f72ef9ceeaa8	0.314951	Mild	No_DR	No_DR	1	1	-0.685049
f762c272c522	f762c272c522	0.342918	Mild	Mild	Mild	1	0	0.342918
f7fec8935126	f7fec8935126	0.648202	Mild	Mild	Mild	1	0	0.648202
fb6b8200b7f8	fb6b8200b7f8	0.644365	Mild	Mild	Mild	1	0	0.644365
fca931da5c5e	fca931da5c5e	0.609588	Mild	Mild	Mild	1	0	0.609588
fd62bd0db4f1	fd62bd0db4f1	0.15302	Mild	No_DR	Moderate	0	1	-0.84698
fdd18ccbbdc5	fdd18ccbbdc5	0.246022	Mild	Moderate	Mild	0	1	-0.753978
fe2df69676cf	fe2df69676cf	0.527279	Mild	Mild	Mild	1	0	0.527279
fe674c2f73f5	fe674c2f73f5	0.672605	Mild	Mild	Mild	1	0	0.672605
fea14b3d44b0	fea14b3d44b0	0.695884	Mild	Mild	Mild	1	0	0.695884
fecf4c5ae84b	fecf4c5ae84b	0.614424	Mild	Mild	Mild	1	0	0.614424
						55	32	2.65849

## Sheet: Mild_Alexnet_inceptionv3
		Activation Maps Consensus		Network 1	Network 2
Immagine	Immagine	Gradcam-Consensus	True_Label	Alexnet_Scratch	Densenet_Scratch	Predict_Consensus	Penalty	Trustability
c739ff9580d3	c739ff9580d3	0.328337	Mild	Moderate	Moderate	1	1	-0.671663
c7b622ec8104	c7b622ec8104	0.353184	Mild	Mild	Mild	1	0	0.353184
c8fc0df22999	c8fc0df22999	0.569645	Mild	Mild	Mild	1	0	0.569645
c9485c38fdd5	c9485c38fdd5	0.397727	Mild	Mild	Mild	1	0	0.397727
c96f743915b5	c96f743915b5	0.589983	Mild	Mild	Mild	1	0	0.589983
ca1036496659	ca1036496659	0.128164	Mild	Mild	Mild	1	0	0.128164
ca25745942b0	ca25745942b0	0.556951	Mild	Mild	Mild	1	0	0.556951
ca30a97e9d13	ca30a97e9d13	0.350795	Mild	Mild	Mild	1	0	0.350795
ca63fe4f4b52	ca63fe4f4b52	0.567423	Mild	Mild	Mild	1	0	0.567423
ca6842bfcbc9	ca6842bfcbc9	0.630063	Mild	Mild	Mild	1	0	0.630063
ca7140ecf389	ca7140ecf389	0.350021	Mild	Moderate	Moderate	1	1	-0.649979
cab3dfa7962d	cab3dfa7962d	0.561827	Mild	Mild	Moderate	0	1	-0.438173
cae51154e1ce	cae51154e1ce	0.220435	Mild	No_DR	Mild	0	1	-0.779565
cb2f3c5d71a7	cb2f3c5d71a7	0.696829	Mild	No_DR	Mild	0	1	-0.303171
cc12453ea915	cc12453ea915	0.60665	Mild	Mild	Mild	1	0	0.60665
cc9270f06b65	cc9270f06b65	0.459876	Mild	Mild	Mild	1	0	0.459876
cd45bfa07d41	cd45bfa07d41	0.503497	Mild	Moderate	Moderate	1	1	-0.496503
cd5714db652d	cd5714db652d	0.49052	Mild	Mild	Mild	1	0	0.49052
cf0575534cec	cf0575534cec	0.396839	Mild	Moderate	Moderate	1	1	-0.603161
cf603a9ef2d5	cf603a9ef2d5	0.323324	Mild	Mild	Moderate	0	1	-0.676676
cfd1bd0fcbb4	cfd1bd0fcbb4	0.095165	Mild	No_DR	No_DR	1	1	-0.904835
d06ccd0cf4b8	d06ccd0cf4b8	0.236275	Mild	No_DR	No_DR	1	1	-0.763725
d0d59ed675b5	d0d59ed675b5	0.351609	Mild	Mild	No_DR	0	1	-0.648391
d1cad012a254	d1cad012a254	0.556459	Mild	Mild	Moderate	0	1	-0.443541
d3de0d313d61	d3de0d313d61	0.39602	Mild	No_DR	No_DR	1	1	-0.60398
d4f32b9c07df	d4f32b9c07df	0.647813	Mild	Moderate	Mild	0	1	-0.352187
d567a1a22d33	d567a1a22d33	0.578685	Mild	Mild	Mild	1	0	0.578685
d5b4705ac2ee	d5b4705ac2ee	0.720042	Mild	No_DR	No_DR	1	1	-0.279958
d66b6f333dc7	d66b6f333dc7	0.404611	Mild	Moderate	Moderate	1	1	-0.595389
d66ccb75ada1	d66ccb75ada1	0.614188	Mild	Mild	Moderate	0	1	-0.385812
d6e26fe51dce	d6e26fe51dce	0.417984	Mild	Moderate	Moderate	1	1	-0.582016
d801c0a66738	d801c0a66738	0.525568	Mild	Moderate	Moderate	1	1	-0.474432
d85588ff2ebd	d85588ff2ebd	0.619648	Mild	Mild	Mild	1	0	0.619648
d85d052900b4	d85d052900b4	0.511589	Mild	Mild	Mild	1	0	0.511589
da1fb35f5df9	da1fb35f5df9	0.669615	Mild	Mild	Mild	1	0	0.669615
db4ed1e07aa3	db4ed1e07aa3	0.457244	Mild	Mild	Mild	1	0	0.457244
db690e2d02f8	db690e2d02f8	0.703725	Mild	Mild	Moderate	0	1	-0.296275
dbd062558b81	dbd062558b81	0.336021	Mild	Mild	Mild	1	0	0.336021
dd19428c3d29	dd19428c3d29	0.553572	Mild	Mild	Mild	1	0	0.553572
e07045d7c5f7	e07045d7c5f7	0.49498	Mild	Mild	Mild	1	0	0.49498
e25ccfe38e44	e25ccfe38e44	0.011872	Mild	No_DR	No_DR	1	1	-0.988128
e26d8718ca58	e26d8718ca58	0	Mild	No_DR	No_DR	1	1	-1
e2a233493b90	e2a233493b90	0.538175	Mild	Mild	Mild	1	0	0.538175
e38f3a65b02b	e38f3a65b02b	0.04275	Mild	Proliferate_DR	Mild	0	1	-0.95725
e55188915f9d	e55188915f9d	0.59474	Mild	Mild	Mild	1	0	0.59474
e580676516b0	e580676516b0	0.356042	Mild	No_DR	Mild	0	1	-0.643958
e9286ddf6ffe	e9286ddf6ffe	0.247436	Mild	Proliferate_DR	Mild	0	1	-0.752564
e96bd80a8a53	e96bd80a8a53	0.531063	Mild	Mild	Moderate	0	1	-0.468937
e9ff9352ccb3	e9ff9352ccb3	0.481913	Mild	Mild	Mild	1	0	0.481913
ea15a290eb96	ea15a290eb96	0.348588	Mild	No_DR	No_DR	1	1	-0.651412
ead23cc922ed	ead23cc922ed	0.743494	Mild	Mild	Mild	1	0	0.743494
eba3acc42197	eba3acc42197	0.339422	Mild	Moderate	Moderate	1	1	-0.660578
ec4649213ccf	ec4649213ccf	0.620863	Mild	Mild	Moderate	0	1	-0.379137
ee78ce914066	ee78ce914066	0.564575	Mild	Mild	Proliferate_DR	0	1	-0.435425
eeb231c3ef1f	eeb231c3ef1f	0.755236	Mild	Mild	Moderate	0	1	-0.244764
eed4afc8ec83	eed4afc8ec83	0.495397	Mild	No_DR	No_DR	1	1	-0.504603
ef8109305128	ef8109305128	0.366822	Mild	Mild	Proliferate_DR	0	1	-0.633178
f0c13be90519	f0c13be90519	0.080084	Mild	Moderate	No_DR	0	1	-0.919916
f47a2a4a0411	f47a2a4a0411	0.32914	Mild	Moderate	Moderate	1	1	-0.67086
f481f76a6b75	f481f76a6b75	0.407381	Mild	Mild	Moderate	0	1	-0.592619
f55e1d2a19e4	f55e1d2a19e4	0.435443	Mild	Mild	Moderate	0	1	-0.564557
f5650eb52640	f5650eb52640	0.570863	Mild	Mild	Moderate	0	1	-0.429137
f6f7dba7104d	f6f7dba7104d	0.57928	Mild	Mild	Mild	1	0	0.57928
f72ef9ceeaa8	f72ef9ceeaa8	0.31543	Mild	No_DR	Proliferate_DR	0	1	-0.68457
f762c272c522	f762c272c522	0.350759	Mild	Mild	Mild	1	0	0.350759
f7fec8935126	f7fec8935126	0.558736	Mild	Mild	Mild	1	0	0.558736
fb6b8200b7f8	fb6b8200b7f8	0.557635	Mild	Mild	Mild	1	0	0.557635
fca931da5c5e	fca931da5c5e	0.553765	Mild	Mild	Mild	1	0	0.553765
fd62bd0db4f1	fd62bd0db4f1	0.441442	Mild	No_DR	No_DR	1	1	-0.558558
fdd18ccbbdc5	fdd18ccbbdc5	0.289187	Mild	Moderate	Moderate	1	1	-0.710813
fe2df69676cf	fe2df69676cf	0.624008	Mild	Mild	Mild	1	0	0.624008
fe674c2f73f5	fe674c2f73f5	0.528078	Mild	Mild	Mild	1	0	0.528078
fea14b3d44b0	fea14b3d44b0	0.662481	Mild	Mild	Mild	1	0	0.662481
fecf4c5ae84b	fecf4c5ae84b	0.57106	Mild	Mild	Mild	1	0	0.57106
						52	41	-7.13394

## Sheet: Mild_Alexnet_mobilenetv2
		Activation Maps Consensus		Network 1	Network 2
Immagine	Immagine	Gradcam-Consensus	True_Label	Alexnet_Scratch	Densenet_Scratch	Predict_Consensus	Penalty	Trustability
c739ff9580d3	c739ff9580d3	0.273458	Mild	Moderate	Proliferate_DR	0	1	-0.726542
c7b622ec8104	c7b622ec8104	0.327647	Mild	Mild	Mild	1	0	0.327647
c8fc0df22999	c8fc0df22999	0.686891	Mild	Mild	Mild	1	0	0.686891
c9485c38fdd5	c9485c38fdd5	0.522899	Mild	Mild	Proliferate_DR	0	1	-0.477101
c96f743915b5	c96f743915b5	0.680362	Mild	Mild	Mild	1	0	0.680362
ca1036496659	ca1036496659	0.352593	Mild	Mild	Proliferate_DR	0	1	-0.647407
ca25745942b0	ca25745942b0	0.666261	Mild	Mild	Mild	1	0	0.666261
ca30a97e9d13	ca30a97e9d13	0.386853	Mild	Mild	No_DR	0	1	-0.613147
ca63fe4f4b52	ca63fe4f4b52	0.548349	Mild	Mild	Mild	1	0	0.548349
ca6842bfcbc9	ca6842bfcbc9	0.519068	Mild	Mild	Mild	1	0	0.519068
ca7140ecf389	ca7140ecf389	0.331964	Mild	Moderate	Severe	0	1	-0.668036
cab3dfa7962d	cab3dfa7962d	0.539644	Mild	Mild	Proliferate_DR	0	1	-0.460356
cae51154e1ce	cae51154e1ce	0.025435	Mild	No_DR	Severe	0	1	-0.974565
cb2f3c5d71a7	cb2f3c5d71a7	0.667085	Mild	No_DR	No_DR	1	1	-0.332915
cc12453ea915	cc12453ea915	0.550835	Mild	Mild	Mild	1	0	0.550835
cc9270f06b65	cc9270f06b65	0.364202	Mild	Mild	Mild	1	0	0.364202
cd45bfa07d41	cd45bfa07d41	0.456249	Mild	Moderate	Moderate	1	1	-0.543751
cd5714db652d	cd5714db652d	0.530836	Mild	Mild	Moderate	0	1	-0.469164
cf0575534cec	cf0575534cec	0.22731	Mild	Moderate	Moderate	1	1	-0.77269
cf603a9ef2d5	cf603a9ef2d5	0.286772	Mild	Mild	Moderate	0	1	-0.713228
cfd1bd0fcbb4	cfd1bd0fcbb4	0.149166	Mild	No_DR	No_DR	1	1	-0.850834
d06ccd0cf4b8	d06ccd0cf4b8	0.070073	Mild	No_DR	Moderate	0	1	-0.929927
d0d59ed675b5	d0d59ed675b5	0.427519	Mild	Mild	Moderate	0	1	-0.572481
d1cad012a254	d1cad012a254	0.385284	Mild	Mild	Moderate	0	1	-0.614716
d3de0d313d61	d3de0d313d61	0.221027	Mild	No_DR	No_DR	1	1	-0.778973
d4f32b9c07df	d4f32b9c07df	0.503595	Mild	Moderate	Moderate	1	1	-0.496405
d567a1a22d33	d567a1a22d33	0.643493	Mild	Mild	Mild	1	0	0.643493
d5b4705ac2ee	d5b4705ac2ee	0.689585	Mild	No_DR	No_DR	1	1	-0.310415
d66b6f333dc7	d66b6f333dc7	0.425973	Mild	Moderate	Moderate	1	1	-0.574027
d66ccb75ada1	d66ccb75ada1	0.296942	Mild	Mild	Proliferate_DR	0	1	-0.703058
d6e26fe51dce	d6e26fe51dce	0.454809	Mild	Moderate	Moderate	1	1	-0.545191
d801c0a66738	d801c0a66738	0.515857	Mild	Moderate	Mild	0	1	-0.484143
d85588ff2ebd	d85588ff2ebd	0.566001	Mild	Mild	Moderate	0	1	-0.433999
d85d052900b4	d85d052900b4	0.492104	Mild	Mild	Moderate	0	1	-0.507896
da1fb35f5df9	da1fb35f5df9	0.481352	Mild	Mild	Mild	1	0	0.481352
db4ed1e07aa3	db4ed1e07aa3	0.768699	Mild	Mild	No_DR	0	1	-0.231301
db690e2d02f8	db690e2d02f8	0.580655	Mild	Mild	No_DR	0	1	-0.419345
dbd062558b81	dbd062558b81	0.426223	Mild	Mild	Moderate	0	1	-0.573777
dd19428c3d29	dd19428c3d29	0.551509	Mild	Mild	Mild	1	0	0.551509
e07045d7c5f7	e07045d7c5f7	0.612555	Mild	Mild	Severe	0	1	-0.387445
e25ccfe38e44	e25ccfe38e44	0.280811	Mild	No_DR	No_DR	1	1	-0.719189
e26d8718ca58	e26d8718ca58	0.584236	Mild	No_DR	No_DR	1	1	-0.415764
e2a233493b90	e2a233493b90	0.588244	Mild	Mild	Mild	1	0	0.588244
e38f3a65b02b	e38f3a65b02b	0.278515	Mild	Proliferate_DR	Proliferate_DR	1	1	-0.721485
e55188915f9d	e55188915f9d	0.591338	Mild	Mild	Moderate	0	1	-0.408662
e580676516b0	e580676516b0	0.53377	Mild	No_DR	Severe	0	1	-0.46623
e9286ddf6ffe	e9286ddf6ffe	0.344581	Mild	Proliferate_DR	Moderate	0	1	-0.655419
e96bd80a8a53	e96bd80a8a53	0.546587	Mild	Mild	Proliferate_DR	0	1	-0.453413
e9ff9352ccb3	e9ff9352ccb3	0.619833	Mild	Mild	Proliferate_DR	0	1	-0.380167
ea15a290eb96	ea15a290eb96	0.512682	Mild	No_DR	No_DR	1	1	-0.487318
ead23cc922ed	ead23cc922ed	0.619807	Mild	Mild	Moderate	0	1	-0.380193
eba3acc42197	eba3acc42197	0.465762	Mild	Moderate	Moderate	1	1	-0.534238
ec4649213ccf	ec4649213ccf	0.624732	Mild	Mild	Mild	1	0	0.624732
ee78ce914066	ee78ce914066	0.546855	Mild	Mild	Proliferate_DR	0	1	-0.453145
eeb231c3ef1f	eeb231c3ef1f	0.789983	Mild	Mild	Moderate	0	1	-0.210017
eed4afc8ec83	eed4afc8ec83	0.776537	Mild	No_DR	No_DR	1	1	-0.223463
ef8109305128	ef8109305128	0.322377	Mild	Mild	Mild	1	0	0.322377
f0c13be90519	f0c13be90519	0.414533	Mild	Moderate	Mild	0	1	-0.585467
f47a2a4a0411	f47a2a4a0411	0.338061	Mild	Moderate	Moderate	1	1	-0.661939
f481f76a6b75	f481f76a6b75	0.386642	Mild	Mild	Mild	1	0	0.386642
f55e1d2a19e4	f55e1d2a19e4	0.527072	Mild	Mild	Mild	1	0	0.527072
f5650eb52640	f5650eb52640	0.714912	Mild	Mild	Moderate	0	1	-0.285088
f6f7dba7104d	f6f7dba7104d	0.617923	Mild	Mild	Mild	1	0	0.617923
f72ef9ceeaa8	f72ef9ceeaa8	0.383999	Mild	No_DR	Moderate	0	1	-0.616001
f762c272c522	f762c272c522	0.315231	Mild	Mild	Moderate	0	1	-0.684769
f7fec8935126	f7fec8935126	0.613322	Mild	Mild	Proliferate_DR	0	1	-0.386678
fb6b8200b7f8	fb6b8200b7f8	0.634834	Mild	Mild	Mild	1	0	0.634834
fca931da5c5e	fca931da5c5e	0.615392	Mild	Mild	Moderate	0	1	-0.384608
fd62bd0db4f1	fd62bd0db4f1	0.160504	Mild	No_DR	Proliferate_DR	0	1	-0.839496
fdd18ccbbdc5	fdd18ccbbdc5	0.165353	Mild	Moderate	Proliferate_DR	0	1	-0.834647
fe2df69676cf	fe2df69676cf	0.723642	Mild	Mild	Moderate	0	1	-0.276358
fe674c2f73f5	fe674c2f73f5	0.591934	Mild	Mild	Proliferate_DR	0	1	-0.408066
fea14b3d44b0	fea14b3d44b0	0.784563	Mild	Mild	Mild	1	0	0.784563
fecf4c5ae84b	fecf4c5ae84b	0.696831	Mild	Mild	Proliferate_DR	0	1	-0.303169
						35	55	-19.0815

## Sheet: Mild_Alexnet_resnet18
		Activation Maps Consensus		Network 1	Network 2
Immagine	Immagine	Gradcam-Consensus	True_Label	Alexnet_Scratch	Densenet_Scratch	Predict_Consensus	Penalty	Trustability
c739ff9580d3	c739ff9580d3	0.359441	Mild	Moderate	Moderate	1	1	-0.640559
c7b622ec8104	c7b622ec8104	0.414766	Mild	Mild	Mild	1	0	0.414766
c8fc0df22999	c8fc0df22999	0.503503	Mild	Mild	Mild	1	0	0.503503
c9485c38fdd5	c9485c38fdd5	0.357622	Mild	Mild	Mild	1	0	0.357622
c96f743915b5	c96f743915b5	0.528512	Mild	Mild	Mild	1	0	0.528512
ca1036496659	ca1036496659	0.144052	Mild	Mild	Moderate	0	1	-0.855948
ca25745942b0	ca25745942b0	0.273637	Mild	Mild	Mild	1	0	0.273637
ca30a97e9d13	ca30a97e9d13	0.23428	Mild	Mild	Moderate	0	1	-0.76572
ca63fe4f4b52	ca63fe4f4b52	0.531598	Mild	Mild	Mild	1	0	0.531598
ca6842bfcbc9	ca6842bfcbc9	0.590189	Mild	Mild	Mild	1	0	0.590189
ca7140ecf389	ca7140ecf389	0.330498	Mild	Moderate	Mild	0	1	-0.669502
cab3dfa7962d	cab3dfa7962d	0.463661	Mild	Mild	Mild	1	0	0.463661
cae51154e1ce	cae51154e1ce	0.127388	Mild	No_DR	No_DR	1	1	-0.872612
cb2f3c5d71a7	cb2f3c5d71a7	0.703359	Mild	No_DR	No_DR	1	1	-0.296641
cc12453ea915	cc12453ea915	0.418426	Mild	Mild	Mild	1	0	0.418426
cc9270f06b65	cc9270f06b65	0.368536	Mild	Mild	Mild	1	0	0.368536
cd45bfa07d41	cd45bfa07d41	0.557035	Mild	Moderate	Moderate	1	1	-0.442965
cd5714db652d	cd5714db652d	0.431003	Mild	Mild	Mild	1	0	0.431003
cf0575534cec	cf0575534cec	0.382514	Mild	Moderate	Mild	0	1	-0.617486
cf603a9ef2d5	cf603a9ef2d5	0.215127	Mild	Mild	Mild	1	0	0.215127
cfd1bd0fcbb4	cfd1bd0fcbb4	0.209649	Mild	No_DR	No_DR	1	1	-0.790351
d06ccd0cf4b8	d06ccd0cf4b8	0.125609	Mild	No_DR	Moderate	0	1	-0.874391
d0d59ed675b5	d0d59ed675b5	0.346659	Mild	Mild	Mild	1	0	0.346659
d1cad012a254	d1cad012a254	0.475876	Mild	Mild	Mild	1	0	0.475876
d3de0d313d61	d3de0d313d61	0.253544	Mild	No_DR	No_DR	1	1	-0.746456
d4f32b9c07df	d4f32b9c07df	0.499248	Mild	Moderate	Mild	0	1	-0.500752
d567a1a22d33	d567a1a22d33	0.546387	Mild	Mild	Mild	1	0	0.546387
d5b4705ac2ee	d5b4705ac2ee	0.697677	Mild	No_DR	No_DR	1	1	-0.302323
d66b6f333dc7	d66b6f333dc7	0.404577	Mild	Moderate	Moderate	1	1	-0.595423
d66ccb75ada1	d66ccb75ada1	0.482332	Mild	Mild	Mild	1	0	0.482332
d6e26fe51dce	d6e26fe51dce	0.449361	Mild	Moderate	Moderate	1	1	-0.550639
d801c0a66738	d801c0a66738	0.53584	Mild	Moderate	Moderate	1	1	-0.46416
d85588ff2ebd	d85588ff2ebd	0.439868	Mild	Mild	Mild	1	0	0.439868
d85d052900b4	d85d052900b4	0.548508	Mild	Mild	Mild	1	0	0.548508
da1fb35f5df9	da1fb35f5df9	0.306411	Mild	Mild	Mild	1	0	0.306411
db4ed1e07aa3	db4ed1e07aa3	0.355377	Mild	Mild	Mild	1	0	0.355377
db690e2d02f8	db690e2d02f8	0.494526	Mild	Mild	No_DR	0	1	-0.505474
dbd062558b81	dbd062558b81	0.303293	Mild	Mild	Moderate	0	1	-0.696707
dd19428c3d29	dd19428c3d29	0.549276	Mild	Mild	Mild	1	0	0.549276
e07045d7c5f7	e07045d7c5f7	0.413664	Mild	Mild	Moderate	0	1	-0.586336
e25ccfe38e44	e25ccfe38e44	0.186112	Mild	No_DR	No_DR	1	1	-0.813888
e26d8718ca58	e26d8718ca58	0.131588	Mild	No_DR	No_DR	1	1	-0.868412
e2a233493b90	e2a233493b90	0.355665	Mild	Mild	Moderate	0	1	-0.644335
e38f3a65b02b	e38f3a65b02b	0.290818	Mild	Proliferate_DR	Mild	0	1	-0.709182
e55188915f9d	e55188915f9d	0.508777	Mild	Mild	Mild	1	0	0.508777
e580676516b0	e580676516b0	0.222312	Mild	No_DR	No_DR	1	1	-0.777688
e9286ddf6ffe	e9286ddf6ffe	0.143714	Mild	Proliferate_DR	Moderate	0	1	-0.856286
e96bd80a8a53	e96bd80a8a53	0.501499	Mild	Mild	Mild	1	0	0.501499
e9ff9352ccb3	e9ff9352ccb3	0.417053	Mild	Mild	Mild	1	0	0.417053
ea15a290eb96	ea15a290eb96	0.206867	Mild	No_DR	No_DR	1	1	-0.793133
ead23cc922ed	ead23cc922ed	0.56357	Mild	Mild	Mild	1	0	0.56357
eba3acc42197	eba3acc42197	0.393277	Mild	Moderate	Moderate	1	1	-0.606723
ec4649213ccf	ec4649213ccf	0.5823	Mild	Mild	Mild	1	0	0.5823
ee78ce914066	ee78ce914066	0.381402	Mild	Mild	Moderate	0	1	-0.618598
eeb231c3ef1f	eeb231c3ef1f	0.525638	Mild	Mild	Mild	1	0	0.525638
eed4afc8ec83	eed4afc8ec83	0.566077	Mild	No_DR	No_DR	1	1	-0.433923
ef8109305128	ef8109305128	0.380441	Mild	Mild	Severe	0	1	-0.619559
f0c13be90519	f0c13be90519	0.160368	Mild	Moderate	Moderate	1	1	-0.839632
f47a2a4a0411	f47a2a4a0411	0.224433	Mild	Moderate	Moderate	1	1	-0.775567
f481f76a6b75	f481f76a6b75	0.331248	Mild	Mild	Mild	1	0	0.331248
f55e1d2a19e4	f55e1d2a19e4	0.473112	Mild	Mild	Mild	1	0	0.473112
f5650eb52640	f5650eb52640	0.462047	Mild	Mild	Mild	1	0	0.462047
f6f7dba7104d	f6f7dba7104d	0.504892	Mild	Mild	Moderate	0	1	-0.495108
f72ef9ceeaa8	f72ef9ceeaa8	0.513904	Mild	No_DR	Proliferate_DR	0	1	-0.486096
f762c272c522	f762c272c522	0.283804	Mild	Mild	Moderate	0	1	-0.716196
f7fec8935126	f7fec8935126	0.616727	Mild	Mild	Mild	1	0	0.616727
fb6b8200b7f8	fb6b8200b7f8	0.380668	Mild	Mild	Mild	1	0	0.380668
fca931da5c5e	fca931da5c5e	0.56672	Mild	Mild	Mild	1	0	0.56672
fd62bd0db4f1	fd62bd0db4f1	0.27655	Mild	No_DR	Moderate	0	1	-0.72345
fdd18ccbbdc5	fdd18ccbbdc5	0.287368	Mild	Moderate	Severe	0	1	-0.712632
fe2df69676cf	fe2df69676cf	0.499499	Mild	Mild	Moderate	0	1	-0.500501
fe674c2f73f5	fe674c2f73f5	0.302329	Mild	Mild	Moderate	0	1	-0.697671
fea14b3d44b0	fea14b3d44b0	0.545507	Mild	Mild	Moderate	0	1	-0.454493
fecf4c5ae84b	fecf4c5ae84b	0.581987	Mild	Mild	Mild	1	0	0.581987
						52	40	-10.2589

## Sheet: Mild_Alexnet_resnet50
		Activation Maps Consensus		Network 1	Network 2
Immagine	Immagine	Gradcam-Consensus	True_Label	Alexnet_Scratch	Densenet_Scratch	Predict_Consensus	Penalty	Trustability
c739ff9580d3	c739ff9580d3	0.336788	Mild	Moderate	Moderate	1	1	-0.663212
c7b622ec8104	c7b622ec8104	0.308507	Mild	Mild	Moderate	0	1	-0.691493
c8fc0df22999	c8fc0df22999	0.370828	Mild	Mild	Mild	1	0	0.370828
c9485c38fdd5	c9485c38fdd5	0.541338	Mild	Mild	Mild	1	0	0.541338
c96f743915b5	c96f743915b5	0.57262	Mild	Mild	Mild	1	0	0.57262
ca1036496659	ca1036496659	0.374467	Mild	Mild	Proliferate_DR	0	1	-0.625533
ca25745942b0	ca25745942b0	0.571046	Mild	Mild	Mild	1	0	0.571046
ca30a97e9d13	ca30a97e9d13	0.43631	Mild	Mild	Moderate	0	1	-0.56369
ca63fe4f4b52	ca63fe4f4b52	0.585511	Mild	Mild	Mild	1	0	0.585511
ca6842bfcbc9	ca6842bfcbc9	0.512189	Mild	Mild	Mild	1	0	0.512189
ca7140ecf389	ca7140ecf389	0.389605	Mild	Moderate	Mild	0	1	-0.610395
cab3dfa7962d	cab3dfa7962d	0.725367	Mild	Mild	Mild	1	0	0.725367
cae51154e1ce	cae51154e1ce	0.090805	Mild	No_DR	No_DR	1	1	-0.909195
cb2f3c5d71a7	cb2f3c5d71a7	0.743885	Mild	No_DR	No_DR	1	1	-0.256115
cc12453ea915	cc12453ea915	0.587773	Mild	Mild	Mild	1	0	0.587773
cc9270f06b65	cc9270f06b65	0.687856	Mild	Mild	Mild	1	0	0.687856
cd45bfa07d41	cd45bfa07d41	0.619459	Mild	Moderate	Moderate	1	1	-0.380541
cd5714db652d	cd5714db652d	0.536245	Mild	Mild	Severe	0	1	-0.463755
cf0575534cec	cf0575534cec	0.21523	Mild	Moderate	Moderate	1	1	-0.78477
cf603a9ef2d5	cf603a9ef2d5	0.251621	Mild	Mild	Severe	0	1	-0.748379
cfd1bd0fcbb4	cfd1bd0fcbb4	0	Mild	No_DR	Mild	0	1	-1
d06ccd0cf4b8	d06ccd0cf4b8	0.148829	Mild	No_DR	No_DR	1	1	-0.851171
d0d59ed675b5	d0d59ed675b5	0.522774	Mild	Mild	Mild	1	0	0.522774
d1cad012a254	d1cad012a254	0.528479	Mild	Mild	Moderate	0	1	-0.471521
d3de0d313d61	d3de0d313d61	0.519997	Mild	No_DR	Proliferate_DR	0	1	-0.480003
d4f32b9c07df	d4f32b9c07df	0.664782	Mild	Moderate	Mild	0	1	-0.335218
d567a1a22d33	d567a1a22d33	0.57328	Mild	Mild	Mild	1	0	0.57328
d5b4705ac2ee	d5b4705ac2ee	0.713293	Mild	No_DR	No_DR	1	1	-0.286707
d66b6f333dc7	d66b6f333dc7	0.574587	Mild	Moderate	Moderate	1	1	-0.425413
d66ccb75ada1	d66ccb75ada1	0.70658	Mild	Mild	Moderate	0	1	-0.29342
d6e26fe51dce	d6e26fe51dce	0.592028	Mild	Moderate	Moderate	1	1	-0.407972
d801c0a66738	d801c0a66738	0.502843	Mild	Moderate	Mild	0	1	-0.497157
d85588ff2ebd	d85588ff2ebd	0.645964	Mild	Mild	Mild	1	0	0.645964
d85d052900b4	d85d052900b4	0.414824	Mild	Mild	Moderate	0	1	-0.585176
da1fb35f5df9	da1fb35f5df9	0.540863	Mild	Mild	Mild	1	0	0.540863
db4ed1e07aa3	db4ed1e07aa3	0.331548	Mild	Mild	Mild	1	0	0.331548
db690e2d02f8	db690e2d02f8	0.526375	Mild	Mild	No_DR	0	1	-0.473625
dbd062558b81	dbd062558b81	0.435295	Mild	Mild	Moderate	0	1	-0.564705
dd19428c3d29	dd19428c3d29	0.571673	Mild	Mild	Mild	1	0	0.571673
e07045d7c5f7	e07045d7c5f7	0.45915	Mild	Mild	Mild	1	0	0.45915
e25ccfe38e44	e25ccfe38e44	0.240423	Mild	No_DR	No_DR	1	1	-0.759577
e26d8718ca58	e26d8718ca58	0.292129	Mild	No_DR	No_DR	1	1	-0.707871
e2a233493b90	e2a233493b90	0.546472	Mild	Mild	Mild	1	0	0.546472
e38f3a65b02b	e38f3a65b02b	0.232412	Mild	Proliferate_DR	Proliferate_DR	1	1	-0.767588
e55188915f9d	e55188915f9d	0.536915	Mild	Mild	Mild	1	0	0.536915
e580676516b0	e580676516b0	0.464949	Mild	No_DR	Mild	0	1	-0.535051
e9286ddf6ffe	e9286ddf6ffe	0.403932	Mild	Proliferate_DR	Proliferate_DR	1	1	-0.596068
e96bd80a8a53	e96bd80a8a53	0.550209	Mild	Mild	Mild	1	0	0.550209
e9ff9352ccb3	e9ff9352ccb3	0.547846	Mild	Mild	Mild	1	0	0.547846
ea15a290eb96	ea15a290eb96	0.331202	Mild	No_DR	No_DR	1	1	-0.668798
ead23cc922ed	ead23cc922ed	0.619584	Mild	Mild	Mild	1	0	0.619584
eba3acc42197	eba3acc42197	0.466712	Mild	Moderate	Moderate	1	1	-0.533288
ec4649213ccf	ec4649213ccf	0.587058	Mild	Mild	Mild	1	0	0.587058
ee78ce914066	ee78ce914066	0.570998	Mild	Mild	Proliferate_DR	0	1	-0.429002
eeb231c3ef1f	eeb231c3ef1f	0.574524	Mild	Mild	Mild	1	0	0.574524
eed4afc8ec83	eed4afc8ec83	0.809699	Mild	No_DR	No_DR	1	1	-0.190301
ef8109305128	ef8109305128	0.442489	Mild	Mild	Moderate	0	1	-0.557511
f0c13be90519	f0c13be90519	0.337977	Mild	Moderate	Moderate	1	1	-0.662023
f47a2a4a0411	f47a2a4a0411	0.367182	Mild	Moderate	Moderate	1	1	-0.632818
f481f76a6b75	f481f76a6b75	0.358527	Mild	Mild	Mild	1	0	0.358527
f55e1d2a19e4	f55e1d2a19e4	0.413102	Mild	Mild	Mild	1	0	0.413102
f5650eb52640	f5650eb52640	0.584738	Mild	Mild	Mild	1	0	0.584738
f6f7dba7104d	f6f7dba7104d	0.621896	Mild	Mild	Moderate	0	1	-0.378104
f72ef9ceeaa8	f72ef9ceeaa8	0.480976	Mild	No_DR	No_DR	1	1	-0.519024
f762c272c522	f762c272c522	0.302795	Mild	Mild	Mild	1	0	0.302795
f7fec8935126	f7fec8935126	0.61901	Mild	Mild	Mild	1	0	0.61901
fb6b8200b7f8	fb6b8200b7f8	0.669284	Mild	Mild	Mild	1	0	0.669284
fca931da5c5e	fca931da5c5e	0.500656	Mild	Mild	Mild	1	0	0.500656
fd62bd0db4f1	fd62bd0db4f1	0.19313	Mild	No_DR	Mild	0	1	-0.80687
fdd18ccbbdc5	fdd18ccbbdc5	0.283389	Mild	Moderate	Moderate	1	1	-0.716611
fe2df69676cf	fe2df69676cf	0.423436	Mild	Mild	Moderate	0	1	-0.576564
fe674c2f73f5	fe674c2f73f5	0.320652	Mild	Mild	Moderate	0	1	-0.679348
fea14b3d44b0	fea14b3d44b0	0.693891	Mild	Mild	Mild	1	0	0.693891
fecf4c5ae84b	fecf4c5ae84b	0.70341	Mild	Mild	Moderate	0	1	-0.29659
						51	43	-7.47778

## Sheet: Mild_Alexnet_shufflenet
		Activation Maps Consensus		Network 1	Network 2
Immagine	Immagine	Gradcam-Consensus	True_Label	Alexnet_Scratch	Densenet_Scratch	Predict_Consensus	Penalty	Trustability
c739ff9580d3	c739ff9580d3	0.334268	Mild	Moderate	Mild	0	1	-0.665732
c7b622ec8104	c7b622ec8104	0.395699	Mild	Mild	Moderate	0	1	-0.604301
c8fc0df22999	c8fc0df22999	0.590511	Mild	Mild	No_DR	0	1	-0.409489
c9485c38fdd5	c9485c38fdd5	0.389371	Mild	Mild	Moderate	0	1	-0.610629
c96f743915b5	c96f743915b5	0.532611	Mild	Mild	Mild	1	0	0.532611
ca1036496659	ca1036496659	0.224424	Mild	Mild	Moderate	0	1	-0.775576
ca25745942b0	ca25745942b0	0.537931	Mild	Mild	Mild	1	0	0.537931
ca30a97e9d13	ca30a97e9d13	0.583088	Mild	Mild	Mild	1	0	0.583088
ca63fe4f4b52	ca63fe4f4b52	0.504136	Mild	Mild	Moderate	0	1	-0.495864
ca6842bfcbc9	ca6842bfcbc9	0.609407	Mild	Mild	Mild	1	0	0.609407
ca7140ecf389	ca7140ecf389	0.336224	Mild	Moderate	Mild	0	1	-0.663776
cab3dfa7962d	cab3dfa7962d	0.481328	Mild	Mild	Moderate	0	1	-0.518672
cae51154e1ce	cae51154e1ce	0.078585	Mild	No_DR	No_DR	1	1	-0.921415
cb2f3c5d71a7	cb2f3c5d71a7	0.693895	Mild	No_DR	No_DR	1	1	-0.306105
cc12453ea915	cc12453ea915	0.518641	Mild	Mild	Mild	1	0	0.518641
cc9270f06b65	cc9270f06b65	0.545059	Mild	Mild	Mild	1	0	0.545059
cd45bfa07d41	cd45bfa07d41	0.568227	Mild	Moderate	Moderate	1	1	-0.431773
cd5714db652d	cd5714db652d	0.468769	Mild	Mild	Moderate	0	1	-0.531231
cf0575534cec	cf0575534cec	0.236018	Mild	Moderate	Moderate	1	1	-0.763982
cf603a9ef2d5	cf603a9ef2d5	0.24751	Mild	Mild	Moderate	0	1	-0.75249
cfd1bd0fcbb4	cfd1bd0fcbb4	0.23913	Mild	No_DR	No_DR	1	1	-0.76087
d06ccd0cf4b8	d06ccd0cf4b8	0.217608	Mild	No_DR	No_DR	1	1	-0.782392
d0d59ed675b5	d0d59ed675b5	0.483629	Mild	Mild	Mild	1	0	0.483629
d1cad012a254	d1cad012a254	0.482543	Mild	Mild	Mild	1	0	0.482543
d3de0d313d61	d3de0d313d61	0.450993	Mild	No_DR	Mild	0	1	-0.549007
d4f32b9c07df	d4f32b9c07df	0.517828	Mild	Moderate	Moderate	1	1	-0.482172
d567a1a22d33	d567a1a22d33	0.604081	Mild	Mild	Mild	1	0	0.604081
d5b4705ac2ee	d5b4705ac2ee	0.706412	Mild	No_DR	No_DR	1	1	-0.293588
d66b6f333dc7	d66b6f333dc7	0.502918	Mild	Moderate	Moderate	1	1	-0.497082
d66ccb75ada1	d66ccb75ada1	0.578761	Mild	Mild	Severe	0	1	-0.421239
d6e26fe51dce	d6e26fe51dce	0.435398	Mild	Moderate	Moderate	1	1	-0.564602
d801c0a66738	d801c0a66738	0.577084	Mild	Moderate	Mild	0	1	-0.422916
d85588ff2ebd	d85588ff2ebd	0.439169	Mild	Mild	Mild	1	0	0.439169
d85d052900b4	d85d052900b4	0.641244	Mild	Mild	Mild	1	0	0.641244
da1fb35f5df9	da1fb35f5df9	0.445103	Mild	Mild	Mild	1	0	0.445103
db4ed1e07aa3	db4ed1e07aa3	0.71022	Mild	Mild	Mild	1	0	0.71022
db690e2d02f8	db690e2d02f8	0.557022	Mild	Mild	No_DR	0	1	-0.442978
dbd062558b81	dbd062558b81	0.415626	Mild	Mild	Moderate	0	1	-0.584374
dd19428c3d29	dd19428c3d29	0.519102	Mild	Mild	Mild	1	0	0.519102
e07045d7c5f7	e07045d7c5f7	0.523861	Mild	Mild	Mild	1	0	0.523861
e25ccfe38e44	e25ccfe38e44	0.270949	Mild	No_DR	No_DR	1	1	-0.729051
e26d8718ca58	e26d8718ca58	0.317085	Mild	No_DR	No_DR	1	1	-0.682915
e2a233493b90	e2a233493b90	0.490631	Mild	Mild	Mild	1	0	0.490631
e38f3a65b02b	e38f3a65b02b	0.155895	Mild	Proliferate_DR	Severe	0	1	-0.844105
e55188915f9d	e55188915f9d	0.613904	Mild	Mild	Mild	1	0	0.613904
e580676516b0	e580676516b0	0.499257	Mild	No_DR	Severe	0	1	-0.500743
e9286ddf6ffe	e9286ddf6ffe	0.40414	Mild	Proliferate_DR	Moderate	0	1	-0.59586
e96bd80a8a53	e96bd80a8a53	0.582368	Mild	Mild	Mild	1	0	0.582368
e9ff9352ccb3	e9ff9352ccb3	0.667526	Mild	Mild	Moderate	0	1	-0.332474
ea15a290eb96	ea15a290eb96	0.381756	Mild	No_DR	No_DR	1	1	-0.618244
ead23cc922ed	ead23cc922ed	0.727055	Mild	Mild	Mild	1	0	0.727055
eba3acc42197	eba3acc42197	0.42562	Mild	Moderate	Moderate	1	1	-0.57438
ec4649213ccf	ec4649213ccf	0.720735	Mild	Mild	Mild	1	0	0.720735
ee78ce914066	ee78ce914066	0.59143	Mild	Mild	Mild	1	0	0.59143
eeb231c3ef1f	eeb231c3ef1f	0.670139	Mild	Mild	Mild	1	0	0.670139
eed4afc8ec83	eed4afc8ec83	0.761079	Mild	No_DR	No_DR	1	1	-0.238921
ef8109305128	ef8109305128	0.474627	Mild	Mild	Moderate	0	1	-0.525373
f0c13be90519	f0c13be90519	0.410611	Mild	Moderate	Moderate	1	1	-0.589389
f47a2a4a0411	f47a2a4a0411	0.311873	Mild	Moderate	Moderate	1	1	-0.688127
f481f76a6b75	f481f76a6b75	0.448386	Mild	Mild	Moderate	0	1	-0.551614
f55e1d2a19e4	f55e1d2a19e4	0.435833	Mild	Mild	Moderate	0	1	-0.564167
f5650eb52640	f5650eb52640	0.6162	Mild	Mild	Moderate	0	1	-0.3838
f6f7dba7104d	f6f7dba7104d	0.58189	Mild	Mild	Moderate	0	1	-0.41811
f72ef9ceeaa8	f72ef9ceeaa8	0.449975	Mild	No_DR	Moderate	0	1	-0.550025
f762c272c522	f762c272c522	0.43565	Mild	Mild	Moderate	0	1	-0.56435
f7fec8935126	f7fec8935126	0.665059	Mild	Mild	Moderate	0	1	-0.334941
fb6b8200b7f8	fb6b8200b7f8	0.543223	Mild	Mild	Mild	1	0	0.543223
fca931da5c5e	fca931da5c5e	0.50292	Mild	Mild	Mild	1	0	0.50292
fd62bd0db4f1	fd62bd0db4f1	0.342923	Mild	No_DR	Moderate	0	1	-0.657077
fdd18ccbbdc5	fdd18ccbbdc5	0.369239	Mild	Moderate	Moderate	1	1	-0.630761
fe2df69676cf	fe2df69676cf	0.541102	Mild	Mild	Moderate	0	1	-0.458898
fe674c2f73f5	fe674c2f73f5	0.513877	Mild	Mild	Moderate	0	1	-0.486123
fea14b3d44b0	fea14b3d44b0	0.70776	Mild	Mild	Mild	1	0	0.70776
fecf4c5ae84b	fecf4c5ae84b	0.575668	Mild	Mild	Mild	1	0	0.575668
						44	48	-11.8702

[truncated: 160 more sheets: Mild_Alexnet_vgg16, Mild_Alexnet_vgg19, Mild_Alexnet_xception, Mild_Densenet_alexnet, Mild_Densenet_densenet, Mild_Densenet_efficientnetb0, Mild_Densenet_googlenet, Mild_Densenet_inceptionresnetv2, Mild_Densenet_inceptionv3, Mild_Densenet_mobilenetv2, Mild_Densenet_resnet18, Mild_Densenet_resnet50, Mild_Densenet_shufflenet, Mild_Densenet_vgg16, Mild_Densenet_vgg19, Mild_Densenet_xcpetion, Mild_EfficientNetb0_alexnet, Mild_EfficientNetb0_densenet, Mild_EfficientNetb0_efficientne, Mild_EfficientNetb0_googlenet …]
