# Supplementary material for: Towards trustworthy digital health: reliability of uncertainty-aware convolutional neural networks
Source: PeerJ journal article supplement (doi:10.7717/peerj-cs.3414), 2026-01-28
Supplement: trustworthinessmain.zip [file Diabetic_Retinopathy_Moderate.xlsx]

## Sheet: Moderate_trust
	Network 1	Network 2	Class	Affidabilità	n1_TPR	n1_TNR	n1_FPR	n1_FNR	n2_TPR	n2_TNR	n2_FPR	n2_FNR
	Alexnet	Alexnet	Moderate	0.835
	Alexnet	Densenet	Moderate	0.0594962
	Alexnet	Efficientnetb0	Moderate	0.0959791
	Alexnet	Googlenet	Moderate	0.0665336
	Alexnet	inceptionresnetv2	Moderate	-0.136249
	Alexnet	inceptionv3	Moderate	0.0750777
	Alexnet	mobilenetv2	Moderate	-0.0197382
	Alexnet	resnet18	Moderate	0.0494034
	Alexnet	resnet50	Moderate	-0.196457
	Alexnet	shufflenet	Moderate	0.0887125
	Alexnet	vgg16	Moderate	-0.0764992
	Alexnet	vgg19	Moderate	0.174827
	Alexnet	xception	Moderate	-0.0126693
	Densenet	Alexnet	Moderate	0.0594962
	Densenet	Densenet	Moderate	0.705
	Densenet	Efficientnetb0	Moderate	0.141262
	Densenet	Googlenet	Moderate	0.0434137
	Densenet	inceptionresnetv2	Moderate	-0.206251
	Densenet	inceptionv3	Moderate	0.045258
	Densenet	mobilenetv2	Moderate	0.0190431
	Densenet	resnet18	Moderate	0.0302458
	Densenet	resnet50	Moderate	-0.227919
	Densenet	shufflenet	Moderate	0.103639
	Densenet	vgg16	Moderate	-0.143425
	Densenet	vgg19	Moderate	0.173279
	Densenet	xception	Moderate	0.035797
	Efficientnetb0	Alexnet	Moderate	0.0959791
	Efficientnetb0	Densenet	Moderate	0.141262
	Efficientnetb0	Efficientnetb0	Moderate	0.815
	Efficientnetb0	Googlenet	Moderate	0.0464191
	Efficientnetb0	inceptionresnetv2	Moderate	-0.130485
	Efficientnetb0	inceptionv3	Moderate	0.139908
	Efficientnetb0	mobilenetv2	Moderate	0.139451
	Efficientnetb0	resnet18	Moderate	0.12337
	Efficientnetb0	resnet50	Moderate	-0.216072
	Efficientnetb0	shufflenet	Moderate	0.188714
	Efficientnetb0	vgg16	Moderate	-0.00182958
	Efficientnetb0	vgg19	Moderate	0.409685
	Efficientnetb0	xception	Moderate	0.0684618
	GoogleNet	Alexnet	Moderate	0.0665336
	GoogleNet	densenet	Moderate	0.0434137
	GoogleNet	Efficientnetb0	Moderate	0.0464191
	GoogleNet	Googlenet	Moderate	0.715
	GoogleNet	Inceptionresnetv2	Moderate	-0.244066
	GoogleNet	inceptionv3	Moderate	0.0293791
	GoogleNet	Mobilenetv2	Moderate	-0.0651588
	GoogleNet	resnet18	Moderate	-0.00331251
	GoogleNet	resnet50	Moderate	-0.260104
	GoogleNet	Shufflenet	Moderate	0.013586
	GoogleNet	vgg16	Moderate	-0.164369
	GoogleNet	vgg19	Moderate	0.0860111
	GoogleNet	xception	Moderate	-0.0896449
	Inceptionresnetv2	Alexnet	Moderate	-0.136249
	Inceptionresnetv2	Densenet	Moderate	-0.206251
	Inceptionresnetv2	Efficientnetb0	Moderate	-0.130485
	Inceptionresnetv2	Googlenet	Moderate	-0.244066
	Inceptionresnetv2	inceptionresnetv2	Moderate	0.815
	Inceptionresnetv2	inceptionv3	Moderate	-0.149665
	Inceptionresnetv2	mobilenetv2	Moderate	-0.271131
	Inceptionresnetv2	resnet18	Moderate	-0.17964
	Inceptionresnetv2	resnet50	Moderate	0.504362
	Inceptionresnetv2	shufflenet	Moderate	-0.156009
	Inceptionresnetv2	vgg16	Moderate	0.608452
	Inceptionresnetv2	vgg19	Moderate	-0.0584909
	Inceptionresnetv2	xception	Moderate	-0.235814
	inceptionv3	Alexnet	Moderate	0.0750777
	inceptionv3	Densenet	Moderate	0.045258
	inceptionv3	Efficientnetb0	Moderate	0.139908
	inceptionv3	Googlenet	Moderate	0.0293791
	inceptionv3	inceptionresnetv2	Moderate	-0.149665
	inceptionv3	inceptionv3	Moderate	0.78
	inceptionv3	mobilenetv2	Moderate	0.00643029
	inceptionv3	resnet18	Moderate	0.137405
	inceptionv3	resnet50	Moderate	-0.205072
	inceptionv3	shufflenet	Moderate	0.0934379
	inceptionv3	vgg16	Moderate	-0.0718872
	inceptionv3	vgg19	Moderate	0.221259
	inceptionv3	xception	Moderate	0.13511
	mobilenetv2	Alexnet	Moderate	-0.0197382
	mobilenetv2	Densenet	Moderate	0.0190431
	mobilenetv2	Efficientnetb0	Moderate	0.139451
	mobilenetv2	Googlenet	Moderate	-0.0651588
	mobilenetv2	inceptionresnetv2	Moderate	-0.271131
	mobilenetv2	inceptionv3	Moderate	0.00643029
	mobilenetv2	mobilenetv2	Moderate	0.66
	mobilenetv2	resnet18	Moderate	-0.0209656
	mobilenetv2	resnet50	Moderate	-0.328786
	mobilenetv2	shufflenet	Moderate	0.0875821
	mobilenetv2	vgg16	Moderate	-0.174763
	mobilenetv2	vgg19	Moderate	0.190057
	mobilenetv2	xception	Moderate	-0.0293086
	resnet18	Alexnet	Moderate	0.0494034
	resnet18	Densenet	Moderate	0.0302458
	resnet18	Efficientnetb0	Moderate	0.12337
	resnet18	Googlenet	Moderate	-0.00331251
	resnet18	inceptionresnetv2	Moderate	-0.17964
	resnet18	inceptionv3	Moderate	0.137405
	resnet18	mobilenetv2	Moderate	-0.0209656
	resnet18	resnet18	Moderate	0.76
	resnet18	resnet50	Moderate	-0.233781
	resnet18	shufflenet	Moderate	0.101295
	resnet18	vgg16	Moderate	-0.10406
	resnet18	vgg19	Moderate	0.17841
	resnet18	xception	Moderate	0.0826828
	resnet50	Alexnet	Moderate	-0.196457
	resnet50	Densenet	Moderate	-0.227919
	resnet50	Efficientnetb0	Moderate	-0.216072
	resnet50	Googlenet	Moderate	-0.260104
	resnet50	inceptionresnetv2	Moderate	0.504362
	resnet50	inceptionv3	Moderate	-0.205072
	resnet50	mobilenetv2	Moderate	-0.328786
	resnet50	resnet18	Moderate	-0.233781
	resnet50	resnet50	Moderate	0.735
	resnet50	shufflenet	Moderate	-0.200124
	resnet50	vgg16	Moderate	0.539686
	resnet50	vgg19	Moderate	-0.133846
	resnet50	exception	Moderate	-0.302853
	Shufflenet	Alexnet	Moderate	0.0887125
	Shufflenet	Densenet	Moderate	0.103639
	Shufflenet	efficientnetb0	Moderate	0.188714
	Shufflenet	googlenet	Moderate	0.013586
	Shufflenet	inceptionresnetv2	Moderate	-0.156009
	Shufflenet	inceptionv3	Moderate	0.0934379
	Shufflenet	mobilenetv2	Moderate	0.0875821
	Shufflenet	resnet18	Moderate	0.101295
	Shufflenet	resnet50	Moderate	-0.200124
	Shufflenet	shufflenet	Moderate	0.785
	Shufflenet	vgg16	Moderate	-0.0754379
	Shufflenet	vgg19	Moderate	0.256671
	Shufflenet	xception	Moderate	0.0421596
	vgg16	Alexnet	Moderate	-0.0764992
	vgg16	Densenet	Moderate	-0.143425
	vgg16	efficientnetb0	Moderate	-0.00182958
	vgg16	googlenet	Moderate	-0.164369
	vgg16	inceptionresnetv2	Moderate	0.608452
	vgg16	inceptionv3	Moderate	-0.0718872
	vgg16	mobilenetv2	Moderate	-0.174763
	vgg16	resnet18	Moderate	-0.10406
	vgg16	resnet50	Moderate	0.539686
	vgg16	shufflenet	Moderate	-0.0754379
	vgg16	vgg16	Moderate	0.915
	vgg16	vgg19	Moderate	0.113384
	vgg16	xception	Moderate	-0.217805
	vgg19	Alexnet	Moderate	0.174827
	vgg19	Densenet	Moderate	0.173279
	vgg19	efficientnetb0	Moderate	0.409685
	vgg19	googlenet	Moderate	0.0860111
	vgg19	inceptionresnetv2	Moderate	-0.0584909
	vgg19	inceptionv3	Moderate	0.221259
	vgg19	mobilenetv2	Moderate	0.190057
	vgg19	resnet18	Moderate	0.17841
	vgg19	resnet50	Moderate	-0.133846
	vgg19	shufflenet	Moderate	0.256671
	vgg19	vgg16	Moderate	0.113384
	vgg19	vgg19	Moderate	0.93
	vgg19	xception	Moderate	0.122131
	xception	Alexnet	Moderate	-0.0126693
	xception	Densenet	Moderate	0.035797
	xception	efficientnetb0	Moderate	0.0684618
	xception	googlenet	Moderate	-0.0896449
	xception	inceptionresnetv2	Moderate	-0.235814
	xception	inceptionv3	Moderate	0.13511
	xception	mobilenetv2	Moderate	-0.0293086
	xception	resnet18	Moderate	0.0826828
	xception	resnet50	Moderate	-0.302853
	xception	shufflenet	Moderate	0.0421596
	xception	vgg16	Moderate	-0.217805
	xception	vgg19	Moderate	0.122131
	xception	xception	Moderate	0.635
		Trustability CNN verso Moderate	0.0658731

## Sheet: Moderate_1_alexnet_alexnet
		Activation Maps Consensus		Network 1	Network 2
Immagine	Immagine	Gradcam-Consensus	True_Label	Alexnet_Scratch	Densenet_Scratch	Predict_Consensus	Penalty	Trustability
c87493ed320c		1	Moderate	Moderate	Moderate	1	0	1
c8823cdaf7fa		1	Moderate	Moderate	Moderate	1	0	1
c8905b8d5cf1		1	Moderate	No_DR	No_DR	1	1	0
c8a3eb9a5b52		1	Moderate	Moderate	Moderate	1	0	1
c9d42d7534e0		1	Moderate	Moderate	Moderate	1	0	1
c9f0dc2c8b43		1	Moderate	Moderate	Moderate	1	0	1
ca0f1a17c8e5		1	Moderate	Moderate	Moderate	1	0	1
ca360bec5851		1	Moderate	Moderate	Moderate	1	0	1
ca7570c5925c		1	Moderate	Moderate	Moderate	1	0	1
ca7f5caddf96		1	Moderate	Moderate	Moderate	1	0	1
ca891d37a43c		1	Moderate	Moderate	Moderate	1	0	1
ca9c912ebad7		1	Moderate	Moderate	Moderate	1	0	1
cac40227d3b2		1	Moderate	Moderate	Moderate	1	0	1
cac80797770f		1	Moderate	Mild	Mild	1	1	0
caec68f11c86		1	Moderate	No_DR	No_DR	1	1	0
cb602182cde3		1	Moderate	Moderate	Moderate	1	0	1
cb75210abebe		1	Moderate	Moderate	Moderate	1	0	1
cbc2e57447c2		1	Moderate	Moderate	Moderate	1	0	1
cbf0394039f8		1	Moderate	Moderate	Moderate	1	0	1
cc1eebed9276		1	Moderate	Moderate	Moderate	1	0	1
cc839823755b		1	Moderate	Moderate	Moderate	1	0	1
cca626a0e19a		1	Moderate	Moderate	Moderate	1	0	1
ccd34029493d		1	Moderate	Moderate	Moderate	1	0	1
cd29c88c9e36		1	Moderate	Moderate	Moderate	1	0	1
cd3fd04d72f5		1	Moderate	Moderate	Moderate	1	0	1
cd4e7f9fa1a9		1	Moderate	Moderate	Moderate	1	0	1
cd9e2190c73f		1	Moderate	Moderate	Moderate	1	0	1
ce887b196c23		1	Moderate	Moderate	Moderate	1	0	1
ceaa5803d780		1	Moderate	Moderate	Moderate	1	0	1
ceb601fe8dba		1	Moderate	Moderate	Moderate	1	0	1
cf0824f53dd9		1	Moderate	Moderate	Moderate	1	0	1
d10d315f123f		1	Moderate	Moderate	Moderate	1	0	1
d141728fa392		1	Moderate	Moderate	Moderate	1	0	1
d144144a2f3f		1	Moderate	Moderate	Moderate	1	0	1
d15ca3469b87		1	Moderate	No_DR	No_DR	1	1	0
d18aea8238a0		1	Moderate	Moderate	Moderate	1	0	1
d18b1d8ac4de		1	Moderate	Moderate	Moderate	1	0	1
d18e5b68f6d2		1	Moderate	Moderate	Moderate	1	0	1
d1f1ea894da1		1	Moderate	Moderate	Moderate	1	0	1
d1fb4efb117c		1	Moderate	Moderate	Moderate	1	0	1
d25b8a8ad3c4		1	Moderate	Moderate	Moderate	1	0	1
d264396d8d1a		1	Moderate	Moderate	Moderate	1	0	1
d28bd830c171		1	Moderate	Moderate	Moderate	1	0	1
d29096bd94aa		1	Moderate	Moderate	Moderate	1	0	1
d2c6b99ef62c		1	Moderate	Moderate	Moderate	1	0	1
d364423ec6f9		1	Moderate	Moderate	Moderate	1	0	1
d3be5346684b		1	Moderate	No_DR	No_DR	1	1	0
d3d578fe433f		1	Moderate	Moderate	Moderate	1	0	1
d41b33fcb94f		1	Moderate	Moderate	Moderate	1	0	1
d473f6fafba0		1	Moderate	Mild	Mild	1	1	0
d4be0403e6ab		1	Moderate	No_DR	No_DR	1	1	0
d5a39339ff3d		1	Moderate	Moderate	Moderate	1	0	1
d6228d951958		1	Moderate	Moderate	Moderate	1	0	1
d6283ded6aea		1	Moderate	Moderate	Moderate	1	0	1
d67374d3fa2a		1	Moderate	Moderate	Moderate	1	0	1
d81338217fc5		1	Moderate	Moderate	Moderate	1	0	1
d81b6ed83bc2		1	Moderate	Moderate	Moderate	1	0	1
d83c3efade75		1	Moderate	Moderate	Moderate	1	0	1
d83d0695e215		1	Moderate	Moderate	Moderate	1	0	1
d8404680bba6		1	Moderate	No_DR	No_DR	1	1	0
d85a842d20bd		1	Moderate	Moderate	Moderate	1	0	1
d88806d9ece9		1	Moderate	Moderate	Moderate	1	0	1
d8cdb7d7283a		1	Moderate	Severe	Severe	1	1	0
d91273efb92a		1	Moderate	Moderate	Moderate	1	0	1
d9311f7497cb		1	Moderate	Moderate	Moderate	1	0	1
d94e10f42861		1	Moderate	Moderate	Moderate	1	0	1
d952dbfb0fe4		1	Moderate	Moderate	Moderate	1	0	1
d95959798b57		1	Moderate	Moderate	Moderate	1	0	1
d968a983d4d2		1	Moderate	Moderate	Moderate	1	0	1
d990a3f0cbdb		1	Moderate	Moderate	Moderate	1	0	1
d994203deb64		1	Moderate	Moderate	Moderate	1	0	1
d9a475dfe59a		1	Moderate	Moderate	Moderate	1	0	1
d9bbdc33db83		1	Moderate	Moderate	Moderate	1	0	1
da0a1043abf7		1	Moderate	Moderate	Moderate	1	0	1
da44f80b422b		1	Moderate	Severe	Severe	1	1	0
da8900ac7f29		1	Moderate	Moderate	Moderate	1	0	1
daeaa5d8cf70		1	Moderate	Moderate	Moderate	1	0	1
db49cdf1ea64		1	Moderate	Moderate	Moderate	1	0	1
dbee04ae6426		1	Moderate	Moderate	Moderate	1	0	1
dc3c0d8ee20b		1	Moderate	Moderate	Moderate	1	0	1
dc6fa1b38b83		1	Moderate	Proliferate_DR	Proliferate_DR	1	1	0
dd110d2b8c21		1	Moderate	Moderate	Moderate	1	0	1
dde43aa22ae6		1	Moderate	Moderate	Moderate	1	0	1
de50dfa745f8		1	Moderate	Moderate	Moderate	1	0	1
de778495a1cd		1	Moderate	Moderate	Moderate	1	0	1
dee687c6e88a		1	Moderate	Moderate	Moderate	1	0	1
df3adfd6ba36		1	Moderate	Moderate	Moderate	1	0	1
df5ce3ea7820		1	Moderate	Moderate	Moderate	1	0	1
df8365d6ac33		1	Moderate	Moderate	Moderate	1	0	1
df841a0440d8		1	Moderate	Mild	Mild	1	1	0
e03e70bc8bba		1	Moderate	Mild	Mild	1	1	0
e06d3d4733f0		1	Moderate	Moderate	Moderate	1	0	1
e0863b353093		1	Moderate	Moderate	Moderate	1	0	1
e10190a9d52f		1	Moderate	Moderate	Moderate	1	0	1
e12b67835e03		1	Moderate	No_DR	No_DR	1	1	0
e12d41e7b221		1	Moderate	Moderate	Moderate	1	0	1
e1418d28d668		1	Moderate	No_DR	No_DR	1	1	0
e150935f66a6		1	Moderate	No_DR	No_DR	1	1	0
e16fc934069f		1	Moderate	Moderate	Moderate	1	0	1
e17507a4a1f5		1	Moderate	Mild	Mild	1	1	0
e1e490773462		1	Moderate	Moderate	Moderate	1	0	1
e2161692a0b4		1	Moderate	No_DR	No_DR	1	1	0
e229aca862c7		1	Moderate	Moderate	Moderate	1	0	1
e265c870f9b3		1	Moderate	Moderate	Moderate	1	0	1
e2856afe62c5		1	Moderate	Moderate	Moderate	1	0	1
e2a47a74e6e1		1	Moderate	Moderate	Moderate	1	0	1
e31c42a8652b		1	Moderate	Moderate	Moderate	1	0	1
e34fa07bd64d		1	Moderate	Moderate	Moderate	1	0	1
e387311a840e		1	Moderate	Moderate	Moderate	1	0	1
e3a7671f787b		1	Moderate	Moderate	Moderate	1	0	1
e3e490babc0c		1	Moderate	Moderate	Moderate	1	0	1
e4151feb8443		1	Moderate	Proliferate_DR	Proliferate_DR	1	1	0
e499434242cc		1	Moderate	Moderate	Moderate	1	0	1
e4e343eaae2a		1	Moderate	Moderate	Moderate	1	0	1
e540d2e35d15		1	Moderate	Moderate	Moderate	1	0	1
e599151ca14b		1	Moderate	Moderate	Moderate	1	0	1
e5d56f4f359b		1	Moderate	Moderate	Moderate	1	0	1
e65a2ff90494		1	Moderate	Moderate	Moderate	1	0	1
e65f94ad9be3		1	Moderate	Moderate	Moderate	1	0	1
e663c6627a95		1	Moderate	Moderate	Moderate	1	0	1
e6a58edc5b42		1	Moderate	Moderate	Moderate	1	0	1
e6a6acf7fca1		1	Moderate	Moderate	Moderate	1	0	1
e6f0ce5bf282		1	Moderate	Moderate	Moderate	1	0	1
e724866f5084		1	Moderate	Moderate	Moderate	1	0	1
e756495c11cb		1	Moderate	Moderate	Moderate	1	0	1
e7a372a1c3a4		1	Moderate	Mild	Mild	1	1	0
e7a7187066ad		1	Moderate	Moderate	Moderate	1	0	1
e7defafeb957		1	Moderate	Moderate	Moderate	1	0	1
e7fc93ac5b6d		1	Moderate	Moderate	Moderate	1	0	1
e811f39a1243		1	Moderate	Mild	Mild	1	1	0
e83d315d8f98		1	Moderate	Moderate	Moderate	1	0	1
e85d410d6836		1	Moderate	Moderate	Moderate	1	0	1
e868c3da340b		1	Moderate	Moderate	Moderate	1	0	1
e9129ce55fd7		1	Moderate	No_DR	No_DR	1	1	0
e96099b961b4		1	Moderate	Moderate	Moderate	1	0	1
e9f82b5bbaf4		1	Moderate	Moderate	Moderate	1	0	1
ea05c22d92e9		1	Moderate	Moderate	Moderate	1	0	1
ea1d045f9fea		1	Moderate	Moderate	Moderate	1	0	1
ea4dcb055139		1	Moderate	Severe	Severe	1	1	0
ea588d1e5d96		1	Moderate	Moderate	Moderate	1	0	1
ea9e0fb6fb0b		1	Moderate	Moderate	Moderate	1	0	1
eadfc8809ec8		1	Moderate	Moderate	Moderate	1	0	1
eae901557a84		1	Moderate	Moderate	Moderate	1	0	1
eb1ad14dd281		1	Moderate	Moderate	Moderate	1	0	1
eb32a815f78c		1	Moderate	Moderate	Moderate	1	0	1
ed2c06fcc573		1	Moderate	Moderate	Moderate	1	0	1
ed88faaa325a		1	Moderate	Moderate	Moderate	1	0	1
ee02294cc3d9		1	Moderate	Moderate	Moderate	1	0	1
ee059945b08a		1	Moderate	Moderate	Moderate	1	0	1
ee2c2a5f7d0e		1	Moderate	Moderate	Moderate	1	0	1
ee6e39319b39		1	Moderate	Moderate	Moderate	1	0	1
ee74c3b177e0		1	Moderate	Proliferate_DR	Proliferate_DR	1	1	0
ef7a4ed8d5d1		1	Moderate	Moderate	Moderate	1	0	1
efff2f1a35f5		1	Moderate	Mild	Mild	1	1	0
f0800723bc63		1	Moderate	Moderate	Moderate	1	0	1
f0c0f7b5e820		1	Moderate	Moderate	Moderate	1	0	1
f18abfa690ab		1	Moderate	Moderate	Moderate	1	0	1
f1a761c68559		1	Moderate	Moderate	Moderate	1	0	1
f2094a20b275		1	Moderate	Moderate	Moderate	1	0	1
f23902998c21		1	Moderate	Moderate	Moderate	1	0	1
f2ee81781411		1	Moderate	Moderate	Moderate	1	0	1
f30f203ef51e		1	Moderate	Moderate	Moderate	1	0	1
f3a268d2726d		1	Moderate	No_DR	No_DR	1	1	0
f3a88d3026dc		1	Moderate	Moderate	Moderate	1	0	1
f3b6b7ca1eb1		1	Moderate	Mild	Mild	1	1	0
f3cd489acbee		1	Moderate	Moderate	Moderate	1	0	1
f45f1485c940		1	Moderate	Moderate	Moderate	1	0	1
f460608cf4cc		1	Moderate	Moderate	Moderate	1	0	1
f4d3777f2710		1	Moderate	Moderate	Moderate	1	0	1
f583a722434c		1	Moderate	No_DR	No_DR	1	1	0
f5e9a307288c		1	Moderate	Moderate	Moderate	1	0	1
f61bf44c677c		1	Moderate	Moderate	Moderate	1	0	1
f69400b316a7		1	Moderate	Moderate	Moderate	1	0	1
f7edc074f06b		1	Moderate	Severe	Severe	1	1	0
f80118bbda18		1	Moderate	Moderate	Moderate	1	0	1
f8372e80f731		1	Moderate	Moderate	Moderate	1	0	1
f8fc411092c7		1	Moderate	Moderate	Moderate	1	0	1
f920ccd926db		1	Moderate	Moderate	Moderate	1	0	1
f999c6921e6d		1	Moderate	Moderate	Moderate	1	0	1
f9aa35187bf3		1	Moderate	No_DR	No_DR	1	1	0
f9e779a13204		1	Moderate	Proliferate_DR	Proliferate_DR	1	1	0
f9ecf1795804		1	Moderate	Moderate	Moderate	1	0	1
fa3e544a7401		1	Moderate	Moderate	Moderate	1	0	1
fa748b57262b		1	Moderate	Moderate	Moderate	1	0	1
fac399455195		1	Moderate	Moderate	Moderate	1	0	1
fba493e17448		1	Moderate	Proliferate_DR	Proliferate_DR	1	1	0
fc1b1841eadf		1	Moderate	Moderate	Moderate	1	0	1
fc4c2d35c6f8		1	Moderate	Moderate	Moderate	1	0	1
fc4d69128e7c		1	Moderate	Moderate	Moderate	1	0	1
fc603cbedb41		1	Moderate	Moderate	Moderate	1	0	1
fcc55ae641ae		1	Moderate	Moderate	Moderate	1	0	1
fd48cf452e9d		1	Moderate	Moderate	Moderate	1	0	1
fe37f4492920		1	Moderate	Moderate	Moderate	1	0	1
ff0740cb484a		1	Moderate	Moderate	Moderate	1	0	1
ff344e5c9341		1	Moderate	Moderate	Moderate	1	0	1
ff52392372d3		1	Moderate	Moderate	Moderate	1	0	1
ff77e8e5b5f3		1	Moderate	Mild	Mild	1	1	0
ffa47f6a7bf4		1	Moderate	Moderate	Moderate	1	0	1
ffcf7b45f213		1	Moderate	Moderate	Moderate	1	0	1
ffec9a18a3ce		1	Moderate	Moderate	Moderate	1	0	1
						200	33	167

## Sheet: Moderate_1_alexnet_densenet
		Activation Maps Consensus		Network 1	Network 2
Immagine	Immagine	Gradcam-Consensus	True_Label	Alexnet_Scratch	Densenet_Scratch	Predict_Consensus	Penalty	Trustability
c87493ed320c		0.331883	Moderate	Moderate	Moderate	1	0	0.331883
c8823cdaf7fa		0.435109	Moderate	Moderate	Moderate	1	0	0.435109
c8905b8d5cf1		0.325763	Moderate	No_DR	Moderate	0	1	-0.674237
c8a3eb9a5b52		0.336565	Moderate	Moderate	Moderate	1	0	0.336565
c9d42d7534e0		0.279481	Moderate	Moderate	Moderate	1	0	0.279481
c9f0dc2c8b43		0.340272	Moderate	Moderate	Moderate	1	0	0.340272
ca0f1a17c8e5		0.430276	Moderate	Moderate	Moderate	1	0	0.430276
ca360bec5851		0.456077	Moderate	Moderate	Moderate	1	0	0.456077
ca7570c5925c		0.615936	Moderate	Moderate	Proliferate_DR	0	1	-0.384064
ca7f5caddf96		0.321325	Moderate	Moderate	Moderate	1	0	0.321325
ca891d37a43c		0.346404	Moderate	Moderate	Moderate	1	0	0.346404
ca9c912ebad7		0.503674	Moderate	Moderate	Moderate	1	0	0.503674
cac40227d3b2		0.397653	Moderate	Moderate	Moderate	1	0	0.397653
cac80797770f		0.392494	Moderate	Mild	Mild	1	1	-0.607506
caec68f11c86		0.769474	Moderate	No_DR	No_DR	1	1	-0.230526
cb602182cde3		0.426737	Moderate	Moderate	Moderate	1	0	0.426737
cb75210abebe		0.360422	Moderate	Moderate	Moderate	1	0	0.360422
cbc2e57447c2		0.368678	Moderate	Moderate	Moderate	1	0	0.368678
cbf0394039f8		0.522747	Moderate	Moderate	Moderate	1	0	0.522747
cc1eebed9276		0.626291	Moderate	Moderate	Mild	0	1	-0.373709
cc839823755b		0.237881	Moderate	Moderate	Moderate	1	0	0.237881
cca626a0e19a		0.56167	Moderate	Moderate	Moderate	1	0	0.56167
ccd34029493d		0.515741	Moderate	Moderate	Moderate	1	0	0.515741
cd29c88c9e36		0.368526	Moderate	Moderate	Moderate	1	0	0.368526
cd3fd04d72f5		0.283027	Moderate	Moderate	Moderate	1	0	0.283027
cd4e7f9fa1a9		0.302812	Moderate	Moderate	Moderate	1	0	0.302812
cd9e2190c73f		0.447304	Moderate	Moderate	Severe	0	1	-0.552696
ce887b196c23		0.266816	Moderate	Moderate	Moderate	1	0	0.266816
ceaa5803d780		0.584552	Moderate	Moderate	Moderate	1	0	0.584552
ceb601fe8dba		0.532835	Moderate	Moderate	Moderate	1	0	0.532835
cf0824f53dd9		0.545883	Moderate	Moderate	Severe	0	1	-0.454117
d10d315f123f		0.212083	Moderate	Moderate	Moderate	1	0	0.212083
d141728fa392		0.175527	Moderate	Moderate	Moderate	1	0	0.175527
d144144a2f3f		0.125207	Moderate	Moderate	Moderate	1	0	0.125207
d15ca3469b87		0.255705	Moderate	No_DR	Mild	0	1	-0.744295
d18aea8238a0		0.194816	Moderate	Moderate	Proliferate_DR	0	1	-0.805184
d18b1d8ac4de		0.267531	Moderate	Moderate	Severe	0	1	-0.732469
d18e5b68f6d2		0.330286	Moderate	Moderate	Severe	0	1	-0.669714
d1f1ea894da1		0.528341	Moderate	Moderate	Mild	0	1	-0.471659
d1fb4efb117c		0.493379	Moderate	Moderate	Severe	0	1	-0.506621
d25b8a8ad3c4		0.35518	Moderate	Moderate	Moderate	1	0	0.35518
d264396d8d1a		0.21963	Moderate	Moderate	Proliferate_DR	0	1	-0.78037
d28bd830c171		0.435876	Moderate	Moderate	Moderate	1	0	0.435876
d29096bd94aa		0.134794	Moderate	Moderate	Mild	0	1	-0.865206
d2c6b99ef62c		0.447463	Moderate	Moderate	Moderate	1	0	0.447463
d364423ec6f9		0.595795	Moderate	Moderate	Moderate	1	0	0.595795
d3be5346684b		0.055653	Moderate	No_DR	No_DR	1	1	-0.944347
d3d578fe433f		0.621765	Moderate	Moderate	Moderate	1	0	0.621765
d41b33fcb94f		0.74175	Moderate	Moderate	Moderate	1	0	0.74175
d473f6fafba0		0.565873	Moderate	Mild	Moderate	0	1	-0.434127
d4be0403e6ab		0.349537	Moderate	No_DR	No_DR	1	1	-0.650463
d5a39339ff3d		0.491312	Moderate	Moderate	Moderate	1	0	0.491312
d6228d951958		0.344726	Moderate	Moderate	Moderate	1	0	0.344726
d6283ded6aea		0.515293	Moderate	Moderate	Moderate	1	0	0.515293
d67374d3fa2a		0.783122	Moderate	Moderate	No_DR	0	1	-0.216878
d81338217fc5		0.147138	Moderate	Moderate	Moderate	1	0	0.147138
d81b6ed83bc2		0.283027	Moderate	Moderate	Moderate	1	0	0.283027
d83c3efade75		0.563629	Moderate	Moderate	Moderate	1	0	0.563629
d83d0695e215		0.50737	Moderate	Moderate	Moderate	1	0	0.50737
d8404680bba6		0.456817	Moderate	No_DR	Moderate	0	1	-0.543183
d85a842d20bd		0.335997	Moderate	Moderate	Proliferate_DR	0	1	-0.664003
d88806d9ece9		0.275831	Moderate	Moderate	Proliferate_DR	0	1	-0.724169
d8cdb7d7283a		0.649031	Moderate	Severe	Severe	1	1	-0.350969
d91273efb92a		0.562391	Moderate	Moderate	Moderate	1	0	0.562391
d9311f7497cb		0.34373	Moderate	Moderate	Moderate	1	0	0.34373
d94e10f42861		0.59885	Moderate	Moderate	Moderate	1	0	0.59885
d952dbfb0fe4		0.285925	Moderate	Moderate	Severe	0	1	-0.714075
d95959798b57		0.250834	Moderate	Moderate	Moderate	1	0	0.250834
d968a983d4d2		0.009855	Moderate	Moderate	Moderate	1	0	0.009855
d990a3f0cbdb		0.328037	Moderate	Moderate	Moderate	1	0	0.328037
d994203deb64		0.39693	Moderate	Moderate	Moderate	1	0	0.39693
d9a475dfe59a		0.529449	Moderate	Moderate	Mild	0	1	-0.470551
d9bbdc33db83		0.34347	Moderate	Moderate	Moderate	1	0	0.34347
da0a1043abf7		0.407789	Moderate	Moderate	Moderate	1	0	0.407789
da44f80b422b		0.420053	Moderate	Severe	Moderate	0	1	-0.579947
da8900ac7f29		0.486834	Moderate	Moderate	Moderate	1	0	0.486834
daeaa5d8cf70		0.173348	Moderate	Moderate	Moderate	1	0	0.173348
db49cdf1ea64		0.251465	Moderate	Moderate	Moderate	1	0	0.251465
dbee04ae6426		0.302712	Moderate	Moderate	Severe	0	1	-0.697288
dc3c0d8ee20b		0.346404	Moderate	Moderate	Moderate	1	0	0.346404
dc6fa1b38b83		0.581862	Moderate	Proliferate_DR	Severe	0	1	-0.418138
dd110d2b8c21		0.44515	Moderate	Moderate	Moderate	1	0	0.44515
dde43aa22ae6		0.486811	Moderate	Moderate	Mild	0	1	-0.513189
de50dfa745f8		0.188069	Moderate	Moderate	No_DR	0	1	-0.811931
de778495a1cd		0.548336	Moderate	Moderate	Moderate	1	0	0.548336
dee687c6e88a		0.290602	Moderate	Moderate	Moderate	1	0	0.290602
df3adfd6ba36		0.195127	Moderate	Moderate	Severe	0	1	-0.804873
df5ce3ea7820		0.486772	Moderate	Moderate	Moderate	1	0	0.486772
df8365d6ac33		0.459215	Moderate	Moderate	Moderate	1	0	0.459215
df841a0440d8		0.131246	Moderate	Mild	Mild	1	1	-0.868754
e03e70bc8bba		0.560137	Moderate	Mild	Mild	1	1	-0.439863
e06d3d4733f0		0.447335	Moderate	Moderate	Moderate	1	0	0.447335
e0863b353093		0.528465	Moderate	Moderate	Moderate	1	0	0.528465
e10190a9d52f		0.315922	Moderate	Moderate	Moderate	1	0	0.315922
e12b67835e03		0.654658	Moderate	No_DR	No_DR	1	1	-0.345342
e12d41e7b221		0.463251	Moderate	Moderate	Moderate	1	0	0.463251
e1418d28d668		0.232891	Moderate	No_DR	Moderate	0	1	-0.767109
e150935f66a6		0.766332	Moderate	No_DR	No_DR	1	1	-0.233668
e16fc934069f		0.503433	Moderate	Moderate	Proliferate_DR	0	1	-0.496567
e17507a4a1f5		0.692482	Moderate	Mild	Severe	0	1	-0.307518
e1e490773462		0.321496	Moderate	Moderate	Moderate	1	0	0.321496
e2161692a0b4		0.628857	Moderate	No_DR	Mild	0	1	-0.371143
e229aca862c7		0.365115	Moderate	Moderate	Moderate	1	0	0.365115
e265c870f9b3		0.269999	Moderate	Moderate	Moderate	1	0	0.269999
e2856afe62c5		0.687115	Moderate	Moderate	Mild	0	1	-0.312885
e2a47a74e6e1		0.311187	Moderate	Moderate	Moderate	1	0	0.311187
e31c42a8652b		0.353546	Moderate	Moderate	Moderate	1	0	0.353546
e34fa07bd64d		0.311493	Moderate	Moderate	Proliferate_DR	0	1	-0.688507
e387311a840e		0.274465	Moderate	Moderate	Mild	0	1	-0.725535
e3a7671f787b		0.249406	Moderate	Moderate	Moderate	1	0	0.249406
e3e490babc0c		0.474363	Moderate	Moderate	Moderate	1	0	0.474363
e4151feb8443		0.55221	Moderate	Proliferate_DR	Proliferate_DR	1	1	-0.44779
e499434242cc		0.488521	Moderate	Moderate	Moderate	1	0	0.488521
e4e343eaae2a		0.466564	Moderate	Moderate	Moderate	1	0	0.466564
e540d2e35d15		0.615664	Moderate	Moderate	Proliferate_DR	0	1	-0.384336
e599151ca14b		0.37579	Moderate	Moderate	Moderate	1	0	0.37579
e5d56f4f359b		0.377235	Moderate	Moderate	Moderate	1	0	0.377235
e65a2ff90494		0.261175	Moderate	Moderate	Moderate	1	0	0.261175
e65f94ad9be3		0.196221	Moderate	Moderate	Moderate	1	0	0.196221
e663c6627a95		0.437029	Moderate	Moderate	Moderate	1	0	0.437029
e6a58edc5b42		0.558982	Moderate	Moderate	Moderate	1	0	0.558982
e6a6acf7fca1		0.531911	Moderate	Moderate	Moderate	1	0	0.531911
e6f0ce5bf282		0.42519	Moderate	Moderate	Moderate	1	0	0.42519
e724866f5084		0.390107	Moderate	Moderate	Moderate	1	0	0.390107
e756495c11cb		0.332606	Moderate	Moderate	Severe	0	1	-0.667394
e7a372a1c3a4		0.603745	Moderate	Mild	Mild	1	1	-0.396255
e7a7187066ad		0.266816	Moderate	Moderate	Moderate	1	0	0.266816
e7defafeb957		0.298548	Moderate	Moderate	Moderate	1	0	0.298548
e7fc93ac5b6d		0.0526	Moderate	Moderate	Moderate	1	0	0.0526
e811f39a1243		0.679774	Moderate	Mild	Severe	0	1	-0.320226
e83d315d8f98		0.029823	Moderate	Moderate	Moderate	1	0	0.029823
e85d410d6836		0.549281	Moderate	Moderate	Moderate	1	0	0.549281
e868c3da340b		0.474882	Moderate	Moderate	Moderate	1	0	0.474882
e9129ce55fd7		0.298817	Moderate	No_DR	No_DR	1	1	-0.701183
e96099b961b4		0.490267	Moderate	Moderate	Moderate	1	0	0.490267
e9f82b5bbaf4		0.325287	Moderate	Moderate	Severe	0	1	-0.674713
ea05c22d92e9		0.430276	Moderate	Moderate	Moderate	1	0	0.430276
ea1d045f9fea		0.364097	Moderate	Moderate	Moderate	1	0	0.364097
ea4dcb055139		0.078192	Moderate	Severe	Severe	1	1	-0.921808
ea588d1e5d96		0.67892	Moderate	Moderate	Moderate	1	0	0.67892
ea9e0fb6fb0b		0.382453	Moderate	Moderate	Moderate	1	0	0.382453
eadfc8809ec8		0.513489	Moderate	Moderate	Moderate	1	0	0.513489
eae901557a84		0.192007	Moderate	Moderate	Mild	0	1	-0.807993
eb1ad14dd281		0.372897	Moderate	Moderate	Proliferate_DR	0	1	-0.627103
eb32a815f78c		0.311198	Moderate	Moderate	Moderate	1	0	0.311198
ed2c06fcc573		0.477544	Moderate	Moderate	Mild	0	1	-0.522456
ed88faaa325a		0.561434	Moderate	Moderate	Moderate	1	0	0.561434
ee02294cc3d9		0.334263	Moderate	Moderate	Moderate	1	0	0.334263
ee059945b08a		0.284222	Moderate	Moderate	Moderate	1	0	0.284222
ee2c2a5f7d0e		0.338985	Moderate	Moderate	Moderate	1	0	0.338985
ee6e39319b39		0.354224	Moderate	Moderate	Moderate	1	0	0.354224
ee74c3b177e0		0.429735	Moderate	Proliferate_DR	Moderate	0	1	-0.570265
ef7a4ed8d5d1		0.291845	Moderate	Moderate	Moderate	1	0	0.291845
efff2f1a35f5		0.454864	Moderate	Mild	Mild	1	1	-0.545136
f0800723bc63		0.47975	Moderate	Moderate	Moderate	1	0	0.47975
f0c0f7b5e820		0.325753	Moderate	Moderate	Mild	0	1	-0.674247
f18abfa690ab		0.417474	Moderate	Moderate	Moderate	1	0	0.417474
f1a761c68559		0.285796	Moderate	Moderate	Moderate	1	0	0.285796
f2094a20b275		0.44937	Moderate	Moderate	Moderate	1	0	0.44937
f23902998c21		0.574066	Moderate	Moderate	Mild	0	1	-0.425934
f2ee81781411		0.446298	Moderate	Moderate	Moderate	1	0	0.446298
f30f203ef51e		0.580138	Moderate	Moderate	Moderate	1	0	0.580138
f3a268d2726d		0.395754	Moderate	No_DR	Moderate	0	1	-0.604246
f3a88d3026dc		0.604908	Moderate	Moderate	Moderate	1	0	0.604908
f3b6b7ca1eb1		0.461455	Moderate	Mild	Proliferate_DR	0	1	-0.538545
f3cd489acbee		0.506859	Moderate	Moderate	Moderate	1	0	0.506859
f45f1485c940		0.297808	Moderate	Moderate	Moderate	1	0	0.297808
f460608cf4cc		0.371524	Moderate	Moderate	Moderate	1	0	0.371524
f4d3777f2710		0.513978	Moderate	Moderate	Moderate	1	0	0.513978
f583a722434c		0.356237	Moderate	No_DR	Proliferate_DR	0	1	-0.643763
f5e9a307288c		0.502012	Moderate	Moderate	Moderate	1	0	0.502012
f61bf44c677c		0.263738	Moderate	Moderate	Moderate	1	0	0.263738
f69400b316a7		0.412437	Moderate	Moderate	Moderate	1	0	0.412437
f7edc074f06b		0.521804	Moderate	Severe	Severe	1	1	-0.478196
f80118bbda18		0.167371	Moderate	Moderate	Moderate	1	0	0.167371
f8372e80f731		0.576733	Moderate	Moderate	Moderate	1	0	0.576733
f8fc411092c7		0.350214	Moderate	Moderate	Moderate	1	0	0.350214
f920ccd926db		0.465581	Moderate	Moderate	Moderate	1	0	0.465581
f999c6921e6d		0.306504	Moderate	Moderate	Severe	0	1	-0.693496
f9aa35187bf3		0.804131	Moderate	No_DR	No_DR	1	1	-0.195869
f9e779a13204		0.254203	Moderate	Proliferate_DR	Moderate	0	1	-0.745797
f9ecf1795804		0.435876	Moderate	Moderate	Moderate	1	0	0.435876
fa3e544a7401		0.212528	Moderate	Moderate	Moderate	1	0	0.212528
fa748b57262b		0.273344	Moderate	Moderate	Moderate	1	0	0.273344
fac399455195		0.329475	Moderate	Moderate	Moderate	1	0	0.329475
fba493e17448		0.234961	Moderate	Proliferate_DR	Moderate	0	1	-0.765039
fc1b1841eadf		0.496568	Moderate	Moderate	Moderate	1	0	0.496568
fc4c2d35c6f8		0.316145	Moderate	Moderate	Moderate	1	0	0.316145
fc4d69128e7c		0.076736	Moderate	Moderate	No_DR	0	1	-0.923264
fc603cbedb41		0.602227	Moderate	Moderate	Moderate	1	0	0.602227
fcc55ae641ae		0.483392	Moderate	Moderate	Moderate	1	0	0.483392
fd48cf452e9d		0.118359	Moderate	Moderate	Proliferate_DR	0	1	-0.881641
fe37f4492920		0.674537	Moderate	Moderate	Mild	0	1	-0.325463
ff0740cb484a		0.552648	Moderate	Moderate	Moderate	1	0	0.552648
ff344e5c9341		0.575551	Moderate	Moderate	Moderate	1	0	0.575551
ff52392372d3		0.285796	Moderate	Moderate	Moderate	1	0	0.285796
ff77e8e5b5f3		0.305757	Moderate	Mild	Moderate	0	1	-0.694243
ffa47f6a7bf4		0.303381	Moderate	Moderate	Moderate	1	0	0.303381
ffcf7b45f213		0.545668	Moderate	Moderate	Moderate	1	0	0.545668
ffec9a18a3ce		0.497702	Moderate	Moderate	Moderate	1	0	0.497702
						147	69	11.8992

## Sheet: Moderate_1_alexnet_efficientnet
		Activation Maps Consensus		Network 1	Network 2
Immagine	Immagine	Gradcam-Consensus	True_Label	Alexnet_Scratch	Densenet_Scratch	Predict_Consensus	Penalty	Trustability
c87493ed320c		0.3878	Moderate	Moderate	Moderate	1	0	0.3878
c8823cdaf7fa		0.334066	Moderate	Moderate	Moderate	1	0	0.334066
c8905b8d5cf1		0.319779	Moderate	No_DR	Moderate	0	1	-0.680221
c8a3eb9a5b52		0.182524	Moderate	Moderate	Moderate	1	0	0.182524
c9d42d7534e0		0.310875	Moderate	Moderate	Moderate	1	0	0.310875
c9f0dc2c8b43		0.304664	Moderate	Moderate	Moderate	1	0	0.304664
ca0f1a17c8e5		0.27438	Moderate	Moderate	Moderate	1	0	0.27438
ca360bec5851		0.492677	Moderate	Moderate	Moderate	1	0	0.492677
ca7570c5925c		0.588415	Moderate	Moderate	Moderate	1	0	0.588415
ca7f5caddf96		0.093505	Moderate	Moderate	Moderate	1	0	0.093505
ca891d37a43c		0.286158	Moderate	Moderate	Moderate	1	0	0.286158
ca9c912ebad7		0.293947	Moderate	Moderate	Moderate	1	0	0.293947
cac40227d3b2		0.322874	Moderate	Moderate	Moderate	1	0	0.322874
cac80797770f		0.277201	Moderate	Mild	Mild	1	1	-0.722799
caec68f11c86		0.75932	Moderate	No_DR	No_DR	1	1	-0.24068
cb602182cde3		0.529337	Moderate	Moderate	Moderate	1	0	0.529337
cb75210abebe		0.338409	Moderate	Moderate	Moderate	1	0	0.338409
cbc2e57447c2		0.321532	Moderate	Moderate	Moderate	1	0	0.321532
cbf0394039f8		0.482484	Moderate	Moderate	Moderate	1	0	0.482484
cc1eebed9276		0.542113	Moderate	Moderate	Moderate	1	0	0.542113
cc839823755b		0.160626	Moderate	Moderate	Moderate	1	0	0.160626
cca626a0e19a		0.735154	Moderate	Moderate	Moderate	1	0	0.735154
ccd34029493d		0.37294	Moderate	Moderate	Moderate	1	0	0.37294
cd29c88c9e36		0.538644	Moderate	Moderate	Moderate	1	0	0.538644
cd3fd04d72f5		0.271879	Moderate	Moderate	Proliferate_DR	0	1	-0.728121
cd4e7f9fa1a9		0.384643	Moderate	Moderate	Moderate	1	0	0.384643
cd9e2190c73f		0.498973	Moderate	Moderate	Moderate	1	0	0.498973
ce887b196c23		0.418419	Moderate	Moderate	Moderate	1	0	0.418419
ceaa5803d780		0.205715	Moderate	Moderate	Moderate	1	0	0.205715
ceb601fe8dba		0.352659	Moderate	Moderate	Moderate	1	0	0.352659
cf0824f53dd9		0.521058	Moderate	Moderate	Moderate	1	0	0.521058
d10d315f123f		0.314036	Moderate	Moderate	Mild	0	1	-0.685964
d141728fa392		0.166296	Moderate	Moderate	Moderate	1	0	0.166296
d144144a2f3f		0.17342	Moderate	Moderate	Moderate	1	0	0.17342
d15ca3469b87		0.029373	Moderate	No_DR	Moderate	0	1	-0.970627
d18aea8238a0		0.216729	Moderate	Moderate	Moderate	1	0	0.216729
d18b1d8ac4de		0.362843	Moderate	Moderate	Moderate	1	0	0.362843
d18e5b68f6d2		0.286488	Moderate	Moderate	Moderate	1	0	0.286488
d1f1ea894da1		0.433821	Moderate	Moderate	Proliferate_DR	0	1	-0.566179
d1fb4efb117c		0.55893	Moderate	Moderate	Proliferate_DR	0	1	-0.44107
d25b8a8ad3c4		0.518072	Moderate	Moderate	Moderate	1	0	0.518072
d264396d8d1a		0.357478	Moderate	Moderate	Moderate	1	0	0.357478
d28bd830c171		0.47539	Moderate	Moderate	Moderate	1	0	0.47539
d29096bd94aa		0.256256	Moderate	Moderate	Mild	0	1	-0.743744
d2c6b99ef62c		0.392838	Moderate	Moderate	Moderate	1	0	0.392838
d364423ec6f9		0.381224	Moderate	Moderate	Moderate	1	0	0.381224
d3be5346684b		0	Moderate	No_DR	Moderate	0	1	-1
d3d578fe433f		0.469894	Moderate	Moderate	Moderate	1	0	0.469894
d41b33fcb94f		0.474969	Moderate	Moderate	Proliferate_DR	0	1	-0.525031
d473f6fafba0		0.553333	Moderate	Mild	Moderate	0	1	-0.446667
d4be0403e6ab		0.538152	Moderate	No_DR	No_DR	1	1	-0.461848
d5a39339ff3d		0.324968	Moderate	Moderate	Moderate	1	0	0.324968
d6228d951958		0.255148	Moderate	Moderate	Moderate	1	0	0.255148
d6283ded6aea		0.450524	Moderate	Moderate	Proliferate_DR	0	1	-0.549476
d67374d3fa2a		0.820245	Moderate	Moderate	No_DR	0	1	-0.179755
d81338217fc5		0.424061	Moderate	Moderate	Moderate	1	0	0.424061
d81b6ed83bc2		0.271879	Moderate	Moderate	Proliferate_DR	0	1	-0.728121
d83c3efade75		0.483004	Moderate	Moderate	Moderate	1	0	0.483004
d83d0695e215		0.425456	Moderate	Moderate	Moderate	1	0	0.425456
d8404680bba6		0	Moderate	No_DR	Severe	0	1	-1
d85a842d20bd		0.450915	Moderate	Moderate	Proliferate_DR	0	1	-0.549085
d88806d9ece9		0.224799	Moderate	Moderate	Moderate	1	0	0.224799
d8cdb7d7283a		0.759444	Moderate	Severe	Mild	0	1	-0.240556
d91273efb92a		0.453845	Moderate	Moderate	Moderate	1	0	0.453845
d9311f7497cb		0.303165	Moderate	Moderate	Moderate	1	0	0.303165
d94e10f42861		0.370369	Moderate	Moderate	Moderate	1	0	0.370369
d952dbfb0fe4		0.312144	Moderate	Moderate	Moderate	1	0	0.312144
d95959798b57		0.316653	Moderate	Moderate	Moderate	1	0	0.316653
d968a983d4d2		0.03534	Moderate	Moderate	Moderate	1	0	0.03534
d990a3f0cbdb		0.469927	Moderate	Moderate	Mild	0	1	-0.530073
d994203deb64		0.283455	Moderate	Moderate	Moderate	1	0	0.283455
d9a475dfe59a		0.491365	Moderate	Moderate	Proliferate_DR	0	1	-0.508635
d9bbdc33db83		0.347782	Moderate	Moderate	Moderate	1	0	0.347782
da0a1043abf7		0.420207	Moderate	Moderate	Moderate	1	0	0.420207
da44f80b422b		0.481217	Moderate	Severe	Moderate	0	1	-0.518783
da8900ac7f29		0.429704	Moderate	Moderate	Moderate	1	0	0.429704
daeaa5d8cf70		0.202143	Moderate	Moderate	Moderate	1	0	0.202143
db49cdf1ea64		0.327428	Moderate	Moderate	Mild	0	1	-0.672572
dbee04ae6426		0.644907	Moderate	Moderate	Moderate	1	0	0.644907
dc3c0d8ee20b		0.286158	Moderate	Moderate	Moderate	1	0	0.286158
dc6fa1b38b83		0.712512	Moderate	Proliferate_DR	Moderate	0	1	-0.287488
dd110d2b8c21		0.339417	Moderate	Moderate	Moderate	1	0	0.339417
dde43aa22ae6		0.468171	Moderate	Moderate	Moderate	1	0	0.468171
de50dfa745f8		0.063085	Moderate	Moderate	Moderate	1	0	0.063085
de778495a1cd		0.521254	Moderate	Moderate	Moderate	1	0	0.521254
dee687c6e88a		0.308074	Moderate	Moderate	Moderate	1	0	0.308074
df3adfd6ba36		0.205581	Moderate	Moderate	Moderate	1	0	0.205581
df5ce3ea7820		0.421889	Moderate	Moderate	Moderate	1	0	0.421889
df8365d6ac33		0.376429	Moderate	Moderate	Moderate	1	0	0.376429
df841a0440d8		0.215121	Moderate	Mild	Moderate	0	1	-0.784879
e03e70bc8bba		0.627321	Moderate	Mild	No_DR	0	1	-0.372679
e06d3d4733f0		0.164246	Moderate	Moderate	Moderate	1	0	0.164246
e0863b353093		0.407808	Moderate	Moderate	Moderate	1	0	0.407808
e10190a9d52f		0.279896	Moderate	Moderate	Moderate	1	0	0.279896
e12b67835e03		0.593511	Moderate	No_DR	No_DR	1	1	-0.406489
e12d41e7b221		0.434725	Moderate	Moderate	Moderate	1	0	0.434725
e1418d28d668		0.706621	Moderate	No_DR	Moderate	0	1	-0.293379
e150935f66a6		0.76988	Moderate	No_DR	No_DR	1	1	-0.23012
e16fc934069f		0.324848	Moderate	Moderate	Moderate	1	0	0.324848
e17507a4a1f5		0.610185	Moderate	Mild	Moderate	0	1	-0.389815
e1e490773462		0.209734	Moderate	Moderate	Moderate	1	0	0.209734
e2161692a0b4		0.567245	Moderate	No_DR	Moderate	0	1	-0.432755
e229aca862c7		0.049718	Moderate	Moderate	Moderate	1	0	0.049718
e265c870f9b3		0.74318	Moderate	Moderate	Moderate	1	0	0.74318
e2856afe62c5		0.626875	Moderate	Moderate	Moderate	1	0	0.626875
e2a47a74e6e1		0.46776	Moderate	Moderate	Moderate	1	0	0.46776
e31c42a8652b		0.428271	Moderate	Moderate	Moderate	1	0	0.428271
e34fa07bd64d		0.251693	Moderate	Moderate	Moderate	1	0	0.251693
e387311a840e		0.386113	Moderate	Moderate	Mild	0	1	-0.613887
e3a7671f787b		0.115797	Moderate	Moderate	Moderate	1	0	0.115797
e3e490babc0c		0.449829	Moderate	Moderate	Moderate	1	0	0.449829
e4151feb8443		0.710855	Moderate	Proliferate_DR	Proliferate_DR	1	1	-0.289145
e499434242cc		0.383552	Moderate	Moderate	Moderate	1	0	0.383552
e4e343eaae2a		0.236419	Moderate	Moderate	Moderate	1	0	0.236419
e540d2e35d15		0.758589	Moderate	Moderate	Mild	0	1	-0.241411
e599151ca14b		0.422044	Moderate	Moderate	Severe	0	1	-0.577956
e5d56f4f359b		0.437145	Moderate	Moderate	Severe	0	1	-0.562855
e65a2ff90494		0.188068	Moderate	Moderate	Moderate	1	0	0.188068
e65f94ad9be3		0.094768	Moderate	Moderate	Moderate	1	0	0.094768
e663c6627a95		0.500779	Moderate	Moderate	Moderate	1	0	0.500779
e6a58edc5b42		0.497834	Moderate	Moderate	Moderate	1	0	0.497834
e6a6acf7fca1		0.456587	Moderate	Moderate	Moderate	1	0	0.456587
e6f0ce5bf282		0.440568	Moderate	Moderate	Moderate	1	0	0.440568
e724866f5084		0.253584	Moderate	Moderate	Moderate	1	0	0.253584
e756495c11cb		0.463103	Moderate	Moderate	Severe	0	1	-0.536897
e7a372a1c3a4		0.59767	Moderate	Mild	Mild	1	1	-0.40233
e7a7187066ad		0.418419	Moderate	Moderate	Moderate	1	0	0.418419
e7defafeb957		0.19598	Moderate	Moderate	Moderate	1	0	0.19598
e7fc93ac5b6d		0.19255	Moderate	Moderate	Moderate	1	0	0.19255
e811f39a1243		0.510468	Moderate	Mild	Severe	0	1	-0.489532
e83d315d8f98		0.497241	Moderate	Moderate	Moderate	1	0	0.497241
e85d410d6836		0.387193	Moderate	Moderate	Moderate	1	0	0.387193
e868c3da340b		0.510124	Moderate	Moderate	Moderate	1	0	0.510124
e9129ce55fd7		0.518765	Moderate	No_DR	Moderate	0	1	-0.481235
e96099b961b4		0.562963	Moderate	Moderate	Mild	0	1	-0.437037
e9f82b5bbaf4		0.300854	Moderate	Moderate	Moderate	1	0	0.300854
ea05c22d92e9		0.27438	Moderate	Moderate	Moderate	1	0	0.27438
ea1d045f9fea		0.429595	Moderate	Moderate	Moderate	1	0	0.429595
ea4dcb055139		0.112398	Moderate	Severe	Moderate	0	1	-0.887602
ea588d1e5d96		0.550807	Moderate	Moderate	Moderate	1	0	0.550807
ea9e0fb6fb0b		0.296618	Moderate	Moderate	Moderate	1	0	0.296618
eadfc8809ec8		0.335331	Moderate	Moderate	Moderate	1	0	0.335331
eae901557a84		0.252299	Moderate	Moderate	Mild	0	1	-0.747701
eb1ad14dd281		0.275431	Moderate	Moderate	Moderate	1	0	0.275431
eb32a815f78c		0.305658	Moderate	Moderate	Moderate	1	0	0.305658
ed2c06fcc573		0.447383	Moderate	Moderate	Moderate	1	0	0.447383
ed88faaa325a		0.393155	Moderate	Moderate	Moderate	1	0	0.393155
ee02294cc3d9		0.38048	Moderate	Moderate	Moderate	1	0	0.38048
ee059945b08a		0.261445	Moderate	Moderate	Moderate	1	0	0.261445
ee2c2a5f7d0e		0.203068	Moderate	Moderate	Moderate	1	0	0.203068
ee6e39319b39		0.185384	Moderate	Moderate	Moderate	1	0	0.185384
ee74c3b177e0		0.156959	Moderate	Proliferate_DR	Moderate	0	1	-0.843041
ef7a4ed8d5d1		0.193565	Moderate	Moderate	Moderate	1	0	0.193565
efff2f1a35f5		0.630316	Moderate	Mild	Moderate	0	1	-0.369684
f0800723bc63		0.485445	Moderate	Moderate	Moderate	1	0	0.485445
f0c0f7b5e820		0.43639	Moderate	Moderate	Mild	0	1	-0.56361
f18abfa690ab		0.448349	Moderate	Moderate	Moderate	1	0	0.448349
f1a761c68559		0.178306	Moderate	Moderate	Moderate	1	0	0.178306
f2094a20b275		0.307569	Moderate	Moderate	Moderate	1	0	0.307569
f23902998c21		0.47962	Moderate	Moderate	Moderate	1	0	0.47962
f2ee81781411		0.089071	Moderate	Moderate	Moderate	1	0	0.089071
f30f203ef51e		0.287983	Moderate	Moderate	Moderate	1	0	0.287983
f3a268d2726d		0.336553	Moderate	No_DR	Moderate	0	1	-0.663447
f3a88d3026dc		0.493233	Moderate	Moderate	Moderate	1	0	0.493233
f3b6b7ca1eb1		0.41747	Moderate	Mild	Moderate	0	1	-0.58253
f3cd489acbee		0.469256	Moderate	Moderate	Moderate	1	0	0.469256
f45f1485c940		0.273734	Moderate	Moderate	Moderate	1	0	0.273734
f460608cf4cc		0.268882	Moderate	Moderate	Moderate	1	0	0.268882
f4d3777f2710		0.504986	Moderate	Moderate	Moderate	1	0	0.504986
f583a722434c		0.6786	Moderate	No_DR	Moderate	0	1	-0.3214
f5e9a307288c		0.469863	Moderate	Moderate	Moderate	1	0	0.469863
f61bf44c677c		0.249452	Moderate	Moderate	Moderate	1	0	0.249452
f69400b316a7		0.516055	Moderate	Moderate	Moderate	1	0	0.516055
f7edc074f06b		0.419335	Moderate	Severe	Severe	1	1	-0.580665
f80118bbda18		0.229473	Moderate	Moderate	Moderate	1	0	0.229473
f8372e80f731		0.780055	Moderate	Moderate	Moderate	1	0	0.780055
f8fc411092c7		0.264311	Moderate	Moderate	Moderate	1	0	0.264311
f920ccd926db		0.379888	Moderate	Moderate	Proliferate_DR	0	1	-0.620112
f999c6921e6d		0.555244	Moderate	Moderate	Severe	0	1	-0.444756
f9aa35187bf3		0.776809	Moderate	No_DR	No_DR	1	1	-0.223191
f9e779a13204		0.167865	Moderate	Proliferate_DR	Moderate	0	1	-0.832135
f9ecf1795804		0.47539	Moderate	Moderate	Moderate	1	0	0.47539
fa3e544a7401		0.080869	Moderate	Moderate	Moderate	1	0	0.080869
fa748b57262b		0.23408	Moderate	Moderate	Moderate	1	0	0.23408
fac399455195		0.237582	Moderate	Moderate	Moderate	1	0	0.237582
fba493e17448		0.394507	Moderate	Proliferate_DR	Moderate	0	1	-0.605493
fc1b1841eadf		0.353548	Moderate	Moderate	Moderate	1	0	0.353548
fc4c2d35c6f8		0.224948	Moderate	Moderate	Moderate	1	0	0.224948
fc4d69128e7c		0	Moderate	Moderate	Moderate	1	0	0
fc603cbedb41		0.544558	Moderate	Moderate	Moderate	1	0	0.544558
fcc55ae641ae		0.458052	Moderate	Moderate	Moderate	1	0	0.458052
fd48cf452e9d		0.250133	Moderate	Moderate	Moderate	1	0	0.250133
fe37f4492920		0.537182	Moderate	Moderate	Proliferate_DR	0	1	-0.462818
ff0740cb484a		0.371905	Moderate	Moderate	Moderate	1	0	0.371905
ff344e5c9341		0.443458	Moderate	Moderate	Moderate	1	0	0.443458
ff52392372d3		0.178306	Moderate	Moderate	Moderate	1	0	0.178306
ff77e8e5b5f3		0.408104	Moderate	Mild	Moderate	0	1	-0.591896
ffa47f6a7bf4		0.325749	Moderate	Moderate	Moderate	1	0	0.325749
ffcf7b45f213		0.376476	Moderate	Moderate	Moderate	1	0	0.376476
ffec9a18a3ce		0.341419	Moderate	Moderate	Moderate	1	0	0.341419
						152	57	19.1958

## Sheet: Moderate_1_alexnet_googlenet
		Activation Maps Consensus		Network 1	Network 2
Immagine	Immagine	Gradcam-Consensus	True_Label	Alexnet_Scratch	Densenet_Scratch	Predict_Consensus	Penalty	Trustability
c87493ed320c		0.542816	Moderate	Moderate	Moderate	1	0	0.542816
c8823cdaf7fa		0.483526	Moderate	Moderate	Moderate	1	0	0.483526
c8905b8d5cf1		0.29783	Moderate	No_DR	Moderate	0	1	-0.70217
c8a3eb9a5b52		0.552294	Moderate	Moderate	Moderate	1	0	0.552294
c9d42d7534e0		0.320717	Moderate	Moderate	Moderate	1	0	0.320717
c9f0dc2c8b43		0.43071	Moderate	Moderate	Moderate	1	0	0.43071
ca0f1a17c8e5		0.640823	Moderate	Moderate	Moderate	1	0	0.640823
ca360bec5851		0.442753	Moderate	Moderate	Moderate	1	0	0.442753
ca7570c5925c		0.332222	Moderate	Moderate	Mild	0	1	-0.667778
ca7f5caddf96		0.313598	Moderate	Moderate	Moderate	1	0	0.313598
ca891d37a43c		0.468492	Moderate	Moderate	Moderate	1	0	0.468492
ca9c912ebad7		0.400409	Moderate	Moderate	Moderate	1	0	0.400409
cac40227d3b2		0.404354	Moderate	Moderate	Mild	0	1	-0.595646
cac80797770f		0.106394	Moderate	Mild	Moderate	0	1	-0.893606
caec68f11c86		0.59904	Moderate	No_DR	No_DR	1	1	-0.40096
cb602182cde3		0.250604	Moderate	Moderate	Moderate	1	0	0.250604
cb75210abebe		0.510692	Moderate	Moderate	Moderate	1	0	0.510692
cbc2e57447c2		0.46432	Moderate	Moderate	Moderate	1	0	0.46432
cbf0394039f8		0.383451	Moderate	Moderate	Mild	0	1	-0.616549
cc1eebed9276		0.504186	Moderate	Moderate	Moderate	1	0	0.504186
cc839823755b		0.414621	Moderate	Moderate	Moderate	1	0	0.414621
cca626a0e19a		0.278007	Moderate	Moderate	Mild	0	1	-0.721993
ccd34029493d		0.517185	Moderate	Moderate	Moderate	1	0	0.517185
cd29c88c9e36		0.565852	Moderate	Moderate	Moderate	1	0	0.565852
cd3fd04d72f5		0.361923	Moderate	Moderate	Moderate	1	0	0.361923
cd4e7f9fa1a9		0.382266	Moderate	Moderate	Moderate	1	0	0.382266
cd9e2190c73f		0.353977	Moderate	Moderate	Mild	0	1	-0.646023
ce887b196c23		0.348481	Moderate	Moderate	No_DR	0	1	-0.651519
ceaa5803d780		0.390332	Moderate	Moderate	Proliferate_DR	0	1	-0.609668
ceb601fe8dba		0.258246	Moderate	Moderate	Moderate	1	0	0.258246
cf0824f53dd9		0.425215	Moderate	Moderate	Moderate	1	0	0.425215
d10d315f123f		0.575036	Moderate	Moderate	Mild	0	1	-0.424964
d141728fa392		0.473331	Moderate	Moderate	Moderate	1	0	0.473331
d144144a2f3f		0.477545	Moderate	Moderate	Moderate	1	0	0.477545
d15ca3469b87		0.502785	Moderate	No_DR	No_DR	1	1	-0.497215
d18aea8238a0		0.320277	Moderate	Moderate	No_DR	0	1	-0.679723
d18b1d8ac4de		0.363262	Moderate	Moderate	Mild	0	1	-0.636738
d18e5b68f6d2		0.328669	Moderate	Moderate	Moderate	1	0	0.328669
d1f1ea894da1		0.38092	Moderate	Moderate	Moderate	1	0	0.38092
d1fb4efb117c		0.606312	Moderate	Moderate	Moderate	1	0	0.606312
d25b8a8ad3c4		0	Moderate	Moderate	Moderate	1	0	0
d264396d8d1a		0.415746	Moderate	Moderate	Severe	0	1	-0.584254
d28bd830c171		0.43425	Moderate	Moderate	Moderate	1	0	0.43425
d29096bd94aa		0.576397	Moderate	Moderate	Mild	0	1	-0.423603
d2c6b99ef62c		0.483349	Moderate	Moderate	Moderate	1	0	0.483349
d364423ec6f9		0.610212	Moderate	Moderate	Moderate	1	0	0.610212
d3be5346684b		0.191606	Moderate	No_DR	No_DR	1	1	-0.808394
d3d578fe433f		0.535235	Moderate	Moderate	Moderate	1	0	0.535235
d41b33fcb94f		0.499451	Moderate	Moderate	Moderate	1	0	0.499451
d473f6fafba0		0.310907	Moderate	Mild	Moderate	0	1	-0.689093
d4be0403e6ab		0.324394	Moderate	No_DR	No_DR	1	1	-0.675606
d5a39339ff3d		0.446163	Moderate	Moderate	Moderate	1	0	0.446163
d6228d951958		0.295249	Moderate	Moderate	Moderate	1	0	0.295249
d6283ded6aea		0.364866	Moderate	Moderate	Moderate	1	0	0.364866
d67374d3fa2a		0.703549	Moderate	Moderate	No_DR	0	1	-0.296451
d81338217fc5		0.026876	Moderate	Moderate	Moderate	1	0	0.026876
d81b6ed83bc2		0.361923	Moderate	Moderate	Moderate	1	0	0.361923
d83c3efade75		0.404048	Moderate	Moderate	Mild	0	1	-0.595952
d83d0695e215		0.492236	Moderate	Moderate	Mild	0	1	-0.507764
d8404680bba6		0.60559	Moderate	No_DR	Moderate	0	1	-0.39441
d85a842d20bd		0.505628	Moderate	Moderate	Moderate	1	0	0.505628
d88806d9ece9		0.268525	Moderate	Moderate	Moderate	1	0	0.268525
d8cdb7d7283a		0.486159	Moderate	Severe	Mild	0	1	-0.513841
d91273efb92a		0.40998	Moderate	Moderate	Moderate	1	0	0.40998
d9311f7497cb		0.295467	Moderate	Moderate	Moderate	1	0	0.295467
d94e10f42861		0.450759	Moderate	Moderate	Moderate	1	0	0.450759
d952dbfb0fe4		0.304461	Moderate	Moderate	Moderate	1	0	0.304461
d95959798b57		0.470615	Moderate	Moderate	Moderate	1	0	0.470615
d968a983d4d2		0.363454	Moderate	Moderate	Moderate	1	0	0.363454
d990a3f0cbdb		0.481797	Moderate	Moderate	Moderate	1	0	0.481797
d994203deb64		0.693024	Moderate	Moderate	Moderate	1	0	0.693024
d9a475dfe59a		0.511485	Moderate	Moderate	Mild	0	1	-0.488515
d9bbdc33db83		0.564828	Moderate	Moderate	Moderate	1	0	0.564828
da0a1043abf7		0.398463	Moderate	Moderate	Moderate	1	0	0.398463
da44f80b422b		0.429689	Moderate	Severe	Moderate	0	1	-0.570311
da8900ac7f29		0.431536	Moderate	Moderate	Moderate	1	0	0.431536
daeaa5d8cf70		0.45763	Moderate	Moderate	Moderate	1	0	0.45763
db49cdf1ea64		0.246801	Moderate	Moderate	Mild	0	1	-0.753199
dbee04ae6426		0.222049	Moderate	Moderate	Moderate	1	0	0.222049
dc3c0d8ee20b		0.468492	Moderate	Moderate	Moderate	1	0	0.468492
dc6fa1b38b83		0.005431	Moderate	Proliferate_DR	Moderate	0	1	-0.994569
dd110d2b8c21		0.529407	Moderate	Moderate	Moderate	1	0	0.529407
dde43aa22ae6		0.48343	Moderate	Moderate	Moderate	1	0	0.48343
de50dfa745f8		0.294442	Moderate	Moderate	Moderate	1	0	0.294442
de778495a1cd		0.635247	Moderate	Moderate	Moderate	1	0	0.635247
dee687c6e88a		0.554649	Moderate	Moderate	Moderate	1	0	0.554649
df3adfd6ba36		0.030026	Moderate	Moderate	Moderate	1	0	0.030026
df5ce3ea7820		0.425282	Moderate	Moderate	Moderate	1	0	0.425282
df8365d6ac33		0.44506	Moderate	Moderate	Moderate	1	0	0.44506
df841a0440d8		0.32233	Moderate	Mild	Mild	1	1	-0.67767
e03e70bc8bba		0.41667	Moderate	Mild	Mild	1	1	-0.58333
e06d3d4733f0		0.431586	Moderate	Moderate	Moderate	1	0	0.431586
e0863b353093		0.572269	Moderate	Moderate	Moderate	1	0	0.572269
e10190a9d52f		0.454836	Moderate	Moderate	Moderate	1	0	0.454836
e12b67835e03		0.602234	Moderate	No_DR	No_DR	1	1	-0.397766
e12d41e7b221		0.588487	Moderate	Moderate	Moderate	1	0	0.588487
e1418d28d668		0.089051	Moderate	No_DR	Moderate	0	1	-0.910949
e150935f66a6		0.710964	Moderate	No_DR	No_DR	1	1	-0.289036
e16fc934069f		0.464254	Moderate	Moderate	Moderate	1	0	0.464254
e17507a4a1f5		0.412202	Moderate	Mild	Mild	1	1	-0.587798
e1e490773462		0.344328	Moderate	Moderate	Moderate	1	0	0.344328
e2161692a0b4		0.486495	Moderate	No_DR	Moderate	0	1	-0.513505
e229aca862c7		0.382105	Moderate	Moderate	Moderate	1	0	0.382105
e265c870f9b3		0.128213	Moderate	Moderate	Moderate	1	0	0.128213
e2856afe62c5		0.624517	Moderate	Moderate	Mild	0	1	-0.375483
e2a47a74e6e1		0.247248	Moderate	Moderate	Moderate	1	0	0.247248
e31c42a8652b		0.39852	Moderate	Moderate	Moderate	1	0	0.39852
e34fa07bd64d		0.505411	Moderate	Moderate	Proliferate_DR	0	1	-0.494589
e387311a840e		0.456288	Moderate	Moderate	Mild	0	1	-0.543712
e3a7671f787b		0.308699	Moderate	Moderate	Moderate	1	0	0.308699
e3e490babc0c		0.643517	Moderate	Moderate	Moderate	1	0	0.643517
e4151feb8443		0.323833	Moderate	Proliferate_DR	Mild	0	1	-0.676167
e499434242cc		0.485364	Moderate	Moderate	Moderate	1	0	0.485364
e4e343eaae2a		0.356603	Moderate	Moderate	Moderate	1	0	0.356603
e540d2e35d15		0.447486	Moderate	Moderate	Mild	0	1	-0.552514
e599151ca14b		0.646768	Moderate	Moderate	Moderate	1	0	0.646768
e5d56f4f359b		0.562357	Moderate	Moderate	Moderate	1	0	0.562357
e65a2ff90494		0.425472	Moderate	Moderate	No_DR	0	1	-0.574528
e65f94ad9be3		0.299939	Moderate	Moderate	Moderate	1	0	0.299939
e663c6627a95		0.589454	Moderate	Moderate	Moderate	1	0	0.589454
e6a58edc5b42		0.623844	Moderate	Moderate	Moderate	1	0	0.623844
e6a6acf7fca1		0.451429	Moderate	Moderate	Moderate	1	0	0.451429
e6f0ce5bf282		0.570016	Moderate	Moderate	Mild	0	1	-0.429984
e724866f5084		0.4424	Moderate	Moderate	Moderate	1	0	0.4424
e756495c11cb		0.419679	Moderate	Moderate	Mild	0	1	-0.580321
e7a372a1c3a4		0.451182	Moderate	Mild	Mild	1	1	-0.548818
e7a7187066ad		0.348481	Moderate	Moderate	No_DR	0	1	-0.651519
e7defafeb957		0.32469	Moderate	Moderate	Moderate	1	0	0.32469
e7fc93ac5b6d		0.393117	Moderate	Moderate	Moderate	1	0	0.393117
e811f39a1243		0.51498	Moderate	Mild	No_DR	0	1	-0.48502
e83d315d8f98		0	Moderate	Moderate	Moderate	1	0	0
e85d410d6836		0.508695	Moderate	Moderate	Moderate	1	0	0.508695
e868c3da340b		0.493967	Moderate	Moderate	Moderate	1	0	0.493967
e9129ce55fd7		0.124919	Moderate	No_DR	No_DR	1	1	-0.875081
e96099b961b4		0.42909	Moderate	Moderate	Mild	0	1	-0.57091
e9f82b5bbaf4		0.503955	Moderate	Moderate	Moderate	1	0	0.503955
ea05c22d92e9		0.640823	Moderate	Moderate	Moderate	1	0	0.640823
ea1d045f9fea		0.289941	Moderate	Moderate	Moderate	1	0	0.289941
ea4dcb055139		0.276681	Moderate	Severe	Moderate	0	1	-0.723319
ea588d1e5d96		0.460333	Moderate	Moderate	Moderate	1	0	0.460333
ea9e0fb6fb0b		0.584467	Moderate	Moderate	Moderate	1	0	0.584467
eadfc8809ec8		0.51171	Moderate	Moderate	Moderate	1	0	0.51171
eae901557a84		0.457453	Moderate	Moderate	Mild	0	1	-0.542547
eb1ad14dd281		0.280287	Moderate	Moderate	Mild	0	1	-0.719713
eb32a815f78c		0.147425	Moderate	Moderate	Moderate	1	0	0.147425
ed2c06fcc573		0.535358	Moderate	Moderate	Mild	0	1	-0.464642
ed88faaa325a		0.556914	Moderate	Moderate	Moderate	1	0	0.556914
ee02294cc3d9		0.518798	Moderate	Moderate	Severe	0	1	-0.481202
ee059945b08a		0.244592	Moderate	Moderate	Moderate	1	0	0.244592
ee2c2a5f7d0e		0.481473	Moderate	Moderate	Moderate	1	0	0.481473
ee6e39319b39		0.254059	Moderate	Moderate	Moderate	1	0	0.254059
ee74c3b177e0		0.334707	Moderate	Proliferate_DR	Moderate	0	1	-0.665293
ef7a4ed8d5d1		0.123567	Moderate	Moderate	Moderate	1	0	0.123567
efff2f1a35f5		0.330625	Moderate	Mild	Mild	1	1	-0.669375
f0800723bc63		0.569338	Moderate	Moderate	Moderate	1	0	0.569338
f0c0f7b5e820		0.259264	Moderate	Moderate	Mild	0	1	-0.740736
f18abfa690ab		0.607138	Moderate	Moderate	Moderate	1	0	0.607138
f1a761c68559		0.444792	Moderate	Moderate	Moderate	1	0	0.444792
f2094a20b275		0.476632	Moderate	Moderate	Moderate	1	0	0.476632
f23902998c21		0.46247	Moderate	Moderate	Moderate	1	0	0.46247
f2ee81781411		0.424815	Moderate	Moderate	Moderate	1	0	0.424815
f30f203ef51e		0.469452	Moderate	Moderate	Moderate	1	0	0.469452
f3a268d2726d		0.097417	Moderate	No_DR	Moderate	0	1	-0.902583
f3a88d3026dc		0.428761	Moderate	Moderate	Moderate	1	0	0.428761
f3b6b7ca1eb1		0.511888	Moderate	Mild	Mild	1	1	-0.488112
f3cd489acbee		0.524017	Moderate	Moderate	Moderate	1	0	0.524017
f45f1485c940		0.411706	Moderate	Moderate	Mild	0	1	-0.588294
f460608cf4cc		0.306138	Moderate	Moderate	Moderate	1	0	0.306138
f4d3777f2710		0.496768	Moderate	Moderate	Moderate	1	0	0.496768
f583a722434c		0.029077	Moderate	No_DR	No_DR	1	1	-0.970923
f5e9a307288c		0.444817	Moderate	Moderate	Moderate	1	0	0.444817
f61bf44c677c		0.487985	Moderate	Moderate	Moderate	1	0	0.487985
f69400b316a7		0.643706	Moderate	Moderate	Moderate	1	0	0.643706
f7edc074f06b		0.323263	Moderate	Severe	Severe	1	1	-0.676737
f80118bbda18		0.207956	Moderate	Moderate	No_DR	0	1	-0.792044
f8372e80f731		0.524945	Moderate	Moderate	Moderate	1	0	0.524945
f8fc411092c7		0.416062	Moderate	Moderate	Moderate	1	0	0.416062
f920ccd926db		0.349384	Moderate	Moderate	Moderate	1	0	0.349384
f999c6921e6d		0.336191	Moderate	Moderate	Mild	0	1	-0.663809
f9aa35187bf3		0.672879	Moderate	No_DR	No_DR	1	1	-0.327121
f9e779a13204		0.39582	Moderate	Proliferate_DR	No_DR	0	1	-0.60418
f9ecf1795804		0.43425	Moderate	Moderate	Moderate	1	0	0.43425
fa3e544a7401		0	Moderate	Moderate	Moderate	1	0	0
fa748b57262b		0.258582	Moderate	Moderate	Moderate	1	0	0.258582
fac399455195		0.456467	Moderate	Moderate	Moderate	1	0	0.456467
fba493e17448		0.430735	Moderate	Proliferate_DR	Moderate	0	1	-0.569265
fc1b1841eadf		0.404056	Moderate	Moderate	Moderate	1	0	0.404056
fc4c2d35c6f8		0.465752	Moderate	Moderate	Moderate	1	0	0.465752
fc4d69128e7c		0.155514	Moderate	Moderate	Moderate	1	0	0.155514
fc603cbedb41		0.565113	Moderate	Moderate	Moderate	1	0	0.565113
fcc55ae641ae		0.382467	Moderate	Moderate	Moderate	1	0	0.382467
fd48cf452e9d		0.084073	Moderate	Moderate	Moderate	1	0	0.084073
fe37f4492920		0.334081	Moderate	Moderate	Mild	0	1	-0.665919
ff0740cb484a		0.512768	Moderate	Moderate	Moderate	1	0	0.512768
ff344e5c9341		0.466755	Moderate	Moderate	Moderate	1	0	0.466755
ff52392372d3		0.444792	Moderate	Moderate	Moderate	1	0	0.444792
ff77e8e5b5f3		0.545012	Moderate	Mild	Mild	1	1	-0.454988
ffa47f6a7bf4		0.408652	Moderate	Moderate	Moderate	1	0	0.408652
ffcf7b45f213		0.466492	Moderate	Moderate	Moderate	1	0	0.466492
ffec9a18a3ce		0.09198	Moderate	Moderate	No_DR	0	1	-0.90802
						148	69	13.3067

## Sheet: Moderate_1_alexnet_inceptionres
		Activation Maps Consensus		Network 1	Network 2
Immagine	Immagine	Gradcam-Consensus	True_Label	Alexnet_Scratch	Densenet_Scratch	Predict_Consensus	Penalty	Trustability
c87493ed320c		0.34176	Moderate	Moderate	Moderate	1	0	0.34176
c8823cdaf7fa		0.253752	Moderate	Moderate	Moderate	1	0	0.253752
c8905b8d5cf1		0.435167	Moderate	No_DR	Moderate	0	1	-0.564833
c8a3eb9a5b52		0.296853	Moderate	Moderate	Moderate	1	0	0.296853
c9d42d7534e0		0.393612	Moderate	Moderate	Moderate	1	0	0.393612
c9f0dc2c8b43		0.422571	Moderate	Moderate	Moderate	1	0	0.422571
ca0f1a17c8e5		0.220232	Moderate	Moderate	Moderate	1	0	0.220232
ca360bec5851		0.349763	Moderate	Moderate	Moderate	1	0	0.349763
ca7570c5925c		0.628853	Moderate	Moderate	Moderate	1	0	0.628853
ca7f5caddf96		0.139884	Moderate	Moderate	Moderate	1	0	0.139884
ca891d37a43c		0.194559	Moderate	Moderate	Moderate	1	0	0.194559
ca9c912ebad7		0.368186	Moderate	Moderate	Moderate	1	0	0.368186
cac40227d3b2		0.411393	Moderate	Moderate	Moderate	1	0	0.411393
cac80797770f		0.073651	Moderate	Mild	Moderate	0	1	-0.926349
caec68f11c86		0.602677	Moderate	No_DR	No_DR	1	1	-0.397323
cb602182cde3		0.248141	Moderate	Moderate	Moderate	1	0	0.248141
cb75210abebe		0.377846	Moderate	Moderate	Moderate	1	0	0.377846
cbc2e57447c2		0.359011	Moderate	Moderate	Moderate	1	0	0.359011
cbf0394039f8		0.409536	Moderate	Moderate	Mild	0	1	-0.590464
cc1eebed9276		0.562169	Moderate	Moderate	Mild	0	1	-0.437831
cc839823755b		0.19984	Moderate	Moderate	Moderate	1	0	0.19984
cca626a0e19a		0.654252	Moderate	Moderate	Moderate	1	0	0.654252
ccd34029493d		0.295925	Moderate	Moderate	Moderate	1	0	0.295925
cd29c88c9e36		0.468623	Moderate	Moderate	Moderate	1	0	0.468623
cd3fd04d72f5		0.26836	Moderate	Moderate	Moderate	1	0	0.26836
cd4e7f9fa1a9		0.442749	Moderate	Moderate	Moderate	1	0	0.442749
cd9e2190c73f		0.493274	Moderate	Moderate	Moderate	1	0	0.493274
ce887b196c23		0.356317	Moderate	Moderate	Moderate	1	0	0.356317
ceaa5803d780		0.410404	Moderate	Moderate	Moderate	1	0	0.410404
ceb601fe8dba		0.447246	Moderate	Moderate	Moderate	1	0	0.447246
cf0824f53dd9		0.537093	Moderate	Moderate	Moderate	1	0	0.537093
d10d315f123f		0.280626	Moderate	Moderate	Moderate	1	0	0.280626
d141728fa392		0.099341	Moderate	Moderate	Moderate	1	0	0.099341
d144144a2f3f		0.249424	Moderate	Moderate	Moderate	1	0	0.249424
d15ca3469b87		0	Moderate	No_DR	Moderate	0	1	-1
d18aea8238a0		0.342647	Moderate	Moderate	Moderate	1	0	0.342647
d18b1d8ac4de		0.356531	Moderate	Moderate	Moderate	1	0	0.356531
d18e5b68f6d2		0.375619	Moderate	Moderate	Moderate	1	0	0.375619
d1f1ea894da1		0.388485	Moderate	Moderate	Moderate	1	0	0.388485
d1fb4efb117c		0.662704	Moderate	Moderate	Moderate	1	0	0.662704
d25b8a8ad3c4		0.193052	Moderate	Moderate	No_DR	0	1	-0.806948
d264396d8d1a		0.226123	Moderate	Moderate	Mild	0	1	-0.773877
d28bd830c171		0.398345	Moderate	Moderate	Moderate	1	0	0.398345
d29096bd94aa		0.232585	Moderate	Moderate	Moderate	1	0	0.232585
d2c6b99ef62c		0.396318	Moderate	Moderate	Moderate	1	0	0.396318
d364423ec6f9		0.510117	Moderate	Moderate	Moderate	1	0	0.510117
d3be5346684b		0	Moderate	No_DR	No_DR	1	1	-1
d3d578fe433f		0.487179	Moderate	Moderate	Moderate	1	0	0.487179
d41b33fcb94f		0.846444	Moderate	Moderate	Moderate	1	0	0.846444
d473f6fafba0		0.493406	Moderate	Mild	Mild	1	1	-0.506594
d4be0403e6ab		0.494084	Moderate	No_DR	No_DR	1	1	-0.505916
d5a39339ff3d		0.28458	Moderate	Moderate	Moderate	1	0	0.28458
d6228d951958		0.204038	Moderate	Moderate	Moderate	1	0	0.204038
d6283ded6aea		0.482613	Moderate	Moderate	Moderate	1	0	0.482613
d67374d3fa2a		0.592308	Moderate	Moderate	No_DR	0	1	-0.407692
d81338217fc5		0.125355	Moderate	Moderate	Moderate	1	0	0.125355
d81b6ed83bc2		0.26836	Moderate	Moderate	Moderate	1	0	0.26836
d83c3efade75		0.453759	Moderate	Moderate	Moderate	1	0	0.453759
d83d0695e215		0.502204	Moderate	Moderate	Moderate	1	0	0.502204
d8404680bba6		0.676921	Moderate	No_DR	No_DR	1	1	-0.323079
d85a842d20bd		0.332506	Moderate	Moderate	Severe	0	1	-0.667494
d88806d9ece9		0.391874	Moderate	Moderate	Moderate	1	0	0.391874
d8cdb7d7283a		0.718407	Moderate	Severe	Mild	0	1	-0.281593
d91273efb92a		0.00015	Moderate	Moderate	Moderate	1	0	0.00015
d9311f7497cb		0.000194	Moderate	Moderate	Moderate	1	0	0.000194
d94e10f42861		0.000167	Moderate	Moderate	Moderate	1	0	0.000167
d952dbfb0fe4		0.000179	Moderate	Moderate	Moderate	1	0	0.000179
d95959798b57		0.000134	Moderate	Moderate	Moderate	1	0	0.000134
d968a983d4d2		9.3e-05	Moderate	Moderate	Moderate	1	0	9.3e-05
d990a3f0cbdb		0.000134	Moderate	Moderate	Moderate	1	0	0.000134
d994203deb64		0.000187	Moderate	Moderate	Moderate	1	0	0.000187
d9a475dfe59a		0.000105	Moderate	Moderate	Moderate	1	0	0.000105
d9bbdc33db83		5.2e-05	Moderate	Moderate	Moderate	1	0	5.2e-05
da0a1043abf7		0.000256	Moderate	Moderate	Moderate	1	0	0.000256
da44f80b422b		0.000181	Moderate	Severe	Moderate	0	1	-0.999819
da8900ac7f29		0.00013	Moderate	Moderate	Moderate	1	0	0.00013
daeaa5d8cf70		6.7e-05	Moderate	Moderate	Moderate	1	0	6.7e-05
db49cdf1ea64		0.0002	Moderate	Moderate	Mild	0	1	-0.9998
dbee04ae6426		0.000119	Moderate	Moderate	No_DR	0	1	-0.999881
dc3c0d8ee20b		0.000204	Moderate	Moderate	Moderate	1	0	0.000204
dc6fa1b38b83		0.00012	Moderate	Proliferate_DR	No_DR	0	1	-0.99988
dd110d2b8c21		0.000102	Moderate	Moderate	Moderate	1	0	0.000102
dde43aa22ae6		0.000158	Moderate	Moderate	Mild	0	1	-0.999842
de50dfa745f8		0.000116	Moderate	Moderate	No_DR	0	1	-0.999884
de778495a1cd		8.8e-05	Moderate	Moderate	Moderate	1	0	8.8e-05
dee687c6e88a		0.00011	Moderate	Moderate	Moderate	1	0	0.00011
df3adfd6ba36		0.000121	Moderate	Moderate	Moderate	1	0	0.000121
df5ce3ea7820		0.000129	Moderate	Moderate	Moderate	1	0	0.000129
df8365d6ac33		0.000157	Moderate	Moderate	Moderate	1	0	0.000157
df841a0440d8		7.7e-05	Moderate	Mild	Mild	1	1	-0.999923
e03e70bc8bba		0.000155	Moderate	Mild	Mild	1	1	-0.999845
e06d3d4733f0		9.1e-05	Moderate	Moderate	Moderate	1	0	9.1e-05
e0863b353093		9.7e-05	Moderate	Moderate	Moderate	1	0	9.7e-05
e10190a9d52f		0.000171	Moderate	Moderate	Moderate	1	0	0.000171
e12b67835e03		0.000237	Moderate	No_DR	No_DR	1	1	-0.999763
e12d41e7b221		0.000104	Moderate	Moderate	Moderate	1	0	0.000104
e1418d28d668		0.000237	Moderate	No_DR	No_DR	1	1	-0.999763
e150935f66a6		0.000206	Moderate	No_DR	No_DR	1	1	-0.999794
e16fc934069f		0.000158	Moderate	Moderate	Moderate	1	0	0.000158
e17507a4a1f5		0.000214	Moderate	Mild	Moderate	0	1	-0.999786
e1e490773462		0.000173	Moderate	Moderate	Moderate	1	0	0.000173
e2161692a0b4		0.000217	Moderate	No_DR	Mild	0	1	-0.999783
e229aca862c7		0.000145	Moderate	Moderate	Moderate	1	0	0.000145
e265c870f9b3		0.000319	Moderate	Moderate	Moderate	1	0	0.000319
e2856afe62c5		9.5e-05	Moderate	Moderate	Moderate	1	0	9.5e-05
e2a47a74e6e1		0.000152	Moderate	Moderate	Severe	0	1	-0.999848
e31c42a8652b		0.000157	Moderate	Moderate	Moderate	1	0	0.000157
e34fa07bd64d		0.000123	Moderate	Moderate	Moderate	1	0	0.000123
e387311a840e		0.000168	Moderate	Moderate	Moderate	1	0	0.000168
e3a7671f787b		0.000131	Moderate	Moderate	Moderate	1	0	0.000131
e3e490babc0c		9.7e-05	Moderate	Moderate	Moderate	1	0	9.7e-05
e4151feb8443		0.000396	Moderate	Proliferate_DR	Proliferate_DR	1	1	-0.999604
e499434242cc		0.00011	Moderate	Moderate	Moderate	1	0	0.00011
e4e343eaae2a		0.000175	Moderate	Moderate	Moderate	1	0	0.000175
e540d2e35d15		0.000235	Moderate	Moderate	Mild	0	1	-0.999765
e599151ca14b		9.7e-05	Moderate	Moderate	Mild	0	1	-0.999903
e5d56f4f359b		0.000122	Moderate	Moderate	Moderate	1	0	0.000122
e65a2ff90494		0.000178	Moderate	Moderate	Moderate	1	0	0.000178
e65f94ad9be3		0.000113	Moderate	Moderate	Moderate	1	0	0.000113
e663c6627a95		0.000148	Moderate	Moderate	Moderate	1	0	0.000148
e6a58edc5b42		0.000186	Moderate	Moderate	Moderate	1	0	0.000186
e6a6acf7fca1		0.000106	Moderate	Moderate	Moderate	1	0	0.000106
e6f0ce5bf282		0.000133	Moderate	Moderate	Moderate	1	0	0.000133
e724866f5084		0.000181	Moderate	Moderate	Moderate	1	0	0.000181
e756495c11cb		0.000138	Moderate	Moderate	Severe	0	1	-0.999862
e7a372a1c3a4		0.000204	Moderate	Mild	Mild	1	1	-0.999796
e7a7187066ad		0.000262	Moderate	Moderate	Moderate	1	0	0.000262
e7defafeb957		0.000175	Moderate	Moderate	Moderate	1	0	0.000175
e7fc93ac5b6d		8.5e-05	Moderate	Moderate	Moderate	1	0	8.5e-05
e811f39a1243		0.000292	Moderate	Mild	Moderate	0	1	-0.999708
e83d315d8f98		0.00018	Moderate	Moderate	Moderate	1	0	0.00018
e85d410d6836		0.000156	Moderate	Moderate	Moderate	1	0	0.000156
e868c3da340b		0.000152	Moderate	Moderate	Moderate	1	0	0.000152
e9129ce55fd7		9.3e-05	Moderate	No_DR	No_DR	1	1	-0.999907
e96099b961b4		0.000119	Moderate	Moderate	Moderate	1	0	0.000119
e9f82b5bbaf4		8.3e-05	Moderate	Moderate	Moderate	1	0	8.3e-05
ea05c22d92e9		0.000177	Moderate	Moderate	Moderate	1	0	0.000177
ea1d045f9fea		0.000155	Moderate	Moderate	Moderate	1	0	0.000155
ea4dcb055139		0.000101	Moderate	Severe	Moderate	0	1	-0.999899
ea588d1e5d96		0.000111	Moderate	Moderate	Moderate	1	0	0.000111
ea9e0fb6fb0b		0.000172	Moderate	Moderate	Moderate	1	0	0.000172
eadfc8809ec8		0.000125	Moderate	Moderate	Moderate	1	0	0.000125
eae901557a84		0.000147	Moderate	Moderate	Moderate	1	0	0.000147
eb1ad14dd281		0.00019	Moderate	Moderate	Moderate	1	0	0.00019
eb32a815f78c		9.3e-05	Moderate	Moderate	Moderate	1	0	9.3e-05
ed2c06fcc573		0.000141	Moderate	Moderate	Moderate	1	0	0.000141
ed88faaa325a		0.000116	Moderate	Moderate	Moderate	1	0	0.000116
ee02294cc3d9		0.000132	Moderate	Moderate	Moderate	1	0	0.000132
ee059945b08a		7e-05	Moderate	Moderate	No_DR	0	1	-0.99993
ee2c2a5f7d0e		0.00016	Moderate	Moderate	Moderate	1	0	0.00016
ee6e39319b39		0.000195	Moderate	Moderate	Moderate	1	0	0.000195
ee74c3b177e0		0.00011	Moderate	Proliferate_DR	Moderate	0	1	-0.99989
ef7a4ed8d5d1		0.000132	Moderate	Moderate	Moderate	1	0	0.000132
efff2f1a35f5		0.000199	Moderate	Mild	Moderate	0	1	-0.999801
f0800723bc63		0.000147	Moderate	Moderate	Moderate	1	0	0.000147
f0c0f7b5e820		0.000181	Moderate	Moderate	Moderate	1	0	0.000181
f18abfa690ab		0.000142	Moderate	Moderate	Moderate	1	0	0.000142
f1a761c68559		0.000168	Moderate	Moderate	Moderate	1	0	0.000168
f2094a20b275		0.000133	Moderate	Moderate	Moderate	1	0	0.000133
f23902998c21		0.000159	Moderate	Moderate	Moderate	1	0	0.000159
f2ee81781411		0.00015	Moderate	Moderate	Moderate	1	0	0.00015
f30f203ef51e		0.000124	Moderate	Moderate	Moderate	1	0	0.000124
f3a268d2726d		9.8e-05	Moderate	No_DR	Moderate	0	1	-0.999902
f3a88d3026dc		9.9e-05	Moderate	Moderate	No_DR	0	1	-0.999901
f3b6b7ca1eb1		6.7e-05	Moderate	Mild	Mild	1	1	-0.999933
f3cd489acbee		0.00011	Moderate	Moderate	Moderate	1	0	0.00011
f45f1485c940		0.000127	Moderate	Moderate	Moderate	1	0	0.000127
f460608cf4cc		0.000132	Moderate	Moderate	Moderate	1	0	0.000132
f4d3777f2710		0.000131	Moderate	Moderate	Moderate	1	0	0.000131
f583a722434c		0.000232	Moderate	No_DR	Moderate	0	1	-0.999768
f5e9a307288c		0.000161	Moderate	Moderate	Moderate	1	0	0.000161
f61bf44c677c		0.000113	Moderate	Moderate	Moderate	1	0	0.000113
f69400b316a7		0.000173	Moderate	Moderate	Moderate	1	0	0.000173
f7edc074f06b		0.000181	Moderate	Severe	Severe	1	1	-0.999819
f80118bbda18		0.000163	Moderate	Moderate	Moderate	1	0	0.000163
f8372e80f731		0.000287	Moderate	Moderate	Moderate	1	0	0.000287
f8fc411092c7		0.000132	Moderate	Moderate	Moderate	1	0	0.000132
f920ccd926db		0.000181	Moderate	Moderate	Moderate	1	0	0.000181
f999c6921e6d		0.000146	Moderate	Moderate	Moderate	1	0	0.000146
f9aa35187bf3		0.000263	Moderate	No_DR	No_DR	1	1	-0.999737
f9e779a13204		0.000141	Moderate	Proliferate_DR	Moderate	0	1	-0.999859
f9ecf1795804		0.000136	Moderate	Moderate	Moderate	1	0	0.000136
fa3e544a7401		8.6e-05	Moderate	Moderate	Moderate	1	0	8.6e-05
fa748b57262b		0.000138	Moderate	Moderate	Moderate	1	0	0.000138
fac399455195		0.000118	Moderate	Moderate	Moderate	1	0	0.000118
fba493e17448		0.000137	Moderate	Proliferate_DR	Moderate	0	1	-0.999863
fc1b1841eadf		0.00012	Moderate	Moderate	Moderate	1	0	0.00012
fc4c2d35c6f8		0.000146	Moderate	Moderate	Moderate	1	0	0.000146
fc4d69128e7c		7e-05	Moderate	Moderate	No_DR	0	1	-0.99993
fc603cbedb41		0.000129	Moderate	Moderate	Moderate	1	0	0.000129
fcc55ae641ae		0.000197	Moderate	Moderate	Moderate	1	0	0.000197
fd48cf452e9d		0.000125	Moderate	Moderate	Moderate	1	0	0.000125
fe37f4492920		0.000177	Moderate	Moderate	Moderate	1	0	0.000177
ff0740cb484a		0.00014	Moderate	Moderate	Moderate	1	0	0.00014
ff344e5c9341		8.9e-05	Moderate	Moderate	Moderate	1	0	8.9e-05
ff52392372d3		0.000168	Moderate	Moderate	Moderate	1	0	0.000168
ff77e8e5b5f3		6.8e-05	Moderate	Mild	Moderate	0	1	-0.999932
ffa47f6a7bf4		0.000186	Moderate	Moderate	Moderate	1	0	0.000186
ffcf7b45f213		0.000191	Moderate	Moderate	Moderate	1	0	0.000191
ffec9a18a3ce		0.000205	Moderate	Moderate	No_DR	0	1	-0.999795
						165	51	-27.2498

## Sheet: Moderate_1_alexnet_inceptionv3
		Activation Maps Consensus		Network 1	Network 2
Immagine	Immagine	Gradcam-Consensus	True_Label	Alexnet_Scratch	Densenet_Scratch	Predict_Consensus	Penalty	Trustability
c87493ed320c		0.228049	Moderate	Moderate	Moderate	1	0	0.228049
c8823cdaf7fa		0.192221	Moderate	Moderate	Moderate	1	0	0.192221
c8905b8d5cf1		0.224939	Moderate	No_DR	Mild	0	1	-0.775061
c8a3eb9a5b52		0.229233	Moderate	Moderate	Moderate	1	0	0.229233
c9d42d7534e0		0.375218	Moderate	Moderate	Severe	0	1	-0.624782
c9f0dc2c8b43		0.363542	Moderate	Moderate	Moderate	1	0	0.363542
ca0f1a17c8e5		0.370634	Moderate	Moderate	Moderate	1	0	0.370634
ca360bec5851		0.410283	Moderate	Moderate	Moderate	1	0	0.410283
ca7570c5925c		0.496768	Moderate	Moderate	Moderate	1	0	0.496768
ca7f5caddf96		0.079519	Moderate	Moderate	Proliferate_DR	0	1	-0.920481
ca891d37a43c		0.297258	Moderate	Moderate	Moderate	1	0	0.297258
ca9c912ebad7		0.321629	Moderate	Moderate	Moderate	1	0	0.321629
cac40227d3b2		0.421417	Moderate	Moderate	Moderate	1	0	0.421417
cac80797770f		0.396256	Moderate	Mild	Moderate	0	1	-0.603744
caec68f11c86		0.539455	Moderate	No_DR	No_DR	1	1	-0.460545
cb602182cde3		0.243941	Moderate	Moderate	Moderate	1	0	0.243941
cb75210abebe		0.419723	Moderate	Moderate	Moderate	1	0	0.419723
cbc2e57447c2		0.267174	Moderate	Moderate	Moderate	1	0	0.267174
cbf0394039f8		0.305762	Moderate	Moderate	Moderate	1	0	0.305762
cc1eebed9276		0.449368	Moderate	Moderate	Moderate	1	0	0.449368
cc839823755b		0.254531	Moderate	Moderate	Moderate	1	0	0.254531
cca626a0e19a		0.720282	Moderate	Moderate	Proliferate_DR	0	1	-0.279718
ccd34029493d		0.325764	Moderate	Moderate	Moderate	1	0	0.325764
cd29c88c9e36		0.454627	Moderate	Moderate	Moderate	1	0	0.454627
cd3fd04d72f5		0.361738	Moderate	Moderate	Moderate	1	0	0.361738
cd4e7f9fa1a9		0.446912	Moderate	Moderate	Moderate	1	0	0.446912
cd9e2190c73f		0.329026	Moderate	Moderate	Mild	0	1	-0.670974
ce887b196c23		0.27456	Moderate	Moderate	Moderate	1	0	0.27456
ceaa5803d780		0.335647	Moderate	Moderate	Severe	0	1	-0.664353
ceb601fe8dba		0.282201	Moderate	Moderate	Moderate	1	0	0.282201
cf0824f53dd9		0.557362	Moderate	Moderate	Moderate	1	0	0.557362
d10d315f123f		0.280681	Moderate	Moderate	Mild	0	1	-0.719319
d141728fa392		0.250581	Moderate	Moderate	Moderate	1	0	0.250581
d144144a2f3f		0.266652	Moderate	Moderate	Moderate	1	0	0.266652
d15ca3469b87		0.15482	Moderate	No_DR	Mild	0	1	-0.84518
d18aea8238a0		0.158522	Moderate	Moderate	Severe	0	1	-0.841478
d18b1d8ac4de		0.32995	Moderate	Moderate	Mild	0	1	-0.67005
d18e5b68f6d2		0.339716	Moderate	Moderate	Moderate	1	0	0.339716
d1f1ea894da1		0.451128	Moderate	Moderate	Moderate	1	0	0.451128
d1fb4efb117c		0.477688	Moderate	Moderate	Moderate	1	0	0.477688
d25b8a8ad3c4		0.280964	Moderate	Moderate	Moderate	1	0	0.280964
d264396d8d1a		0.322844	Moderate	Moderate	Moderate	1	0	0.322844
d28bd830c171		0.371024	Moderate	Moderate	Moderate	1	0	0.371024
d29096bd94aa		0.344466	Moderate	Moderate	Mild	0	1	-0.655534
d2c6b99ef62c		0.398876	Moderate	Moderate	Moderate	1	0	0.398876
d364423ec6f9		0.518329	Moderate	Moderate	Moderate	1	0	0.518329
d3be5346684b		0.213135	Moderate	No_DR	No_DR	1	1	-0.786865
d3d578fe433f		0.412396	Moderate	Moderate	Moderate	1	0	0.412396
d41b33fcb94f		0.704994	Moderate	Moderate	Moderate	1	0	0.704994
d473f6fafba0		0.395033	Moderate	Mild	Severe	0	1	-0.604967
d4be0403e6ab		0.490576	Moderate	No_DR	No_DR	1	1	-0.509424
d5a39339ff3d		0.361288	Moderate	Moderate	Moderate	1	0	0.361288
d6228d951958		0.181588	Moderate	Moderate	Moderate	1	0	0.181588
d6283ded6aea		0.463926	Moderate	Moderate	Moderate	1	0	0.463926
d67374d3fa2a		0.654397	Moderate	Moderate	No_DR	0	1	-0.345603
d81338217fc5		0.070083	Moderate	Moderate	Moderate	1	0	0.070083
d81b6ed83bc2		0.361738	Moderate	Moderate	Moderate	1	0	0.361738
d83c3efade75		0.43704	Moderate	Moderate	Moderate	1	0	0.43704
d83d0695e215		0.512709	Moderate	Moderate	Moderate	1	0	0.512709
d8404680bba6		0.267604	Moderate	No_DR	Moderate	0	1	-0.732396
d85a842d20bd		0.320923	Moderate	Moderate	Moderate	1	0	0.320923
d88806d9ece9		0.307542	Moderate	Moderate	Moderate	1	0	0.307542
d8cdb7d7283a		0.666076	Moderate	Severe	Mild	0	1	-0.333924
d91273efb92a		0.513901	Moderate	Moderate	Moderate	1	0	0.513901
d9311f7497cb		0.403534	Moderate	Moderate	Moderate	1	0	0.403534
d94e10f42861		0.415036	Moderate	Moderate	Moderate	1	0	0.415036
d952dbfb0fe4		0.255443	Moderate	Moderate	Moderate	1	0	0.255443
d95959798b57		0.498198	Moderate	Moderate	Moderate	1	0	0.498198
d968a983d4d2		0	Moderate	Moderate	Moderate	1	0	0
d990a3f0cbdb		0.439932	Moderate	Moderate	Severe	0	1	-0.560068
d994203deb64		0.528532	Moderate	Moderate	Moderate	1	0	0.528532
d9a475dfe59a		0.507254	Moderate	Moderate	Moderate	1	0	0.507254
d9bbdc33db83		0.448488	Moderate	Moderate	Moderate	1	0	0.448488
da0a1043abf7		0.503793	Moderate	Moderate	Moderate	1	0	0.503793
da44f80b422b		0.40952	Moderate	Severe	Moderate	0	1	-0.59048
da8900ac7f29		0.439033	Moderate	Moderate	Moderate	1	0	0.439033
daeaa5d8cf70		0.199986	Moderate	Moderate	Moderate	1	0	0.199986
db49cdf1ea64		0.2661	Moderate	Moderate	Moderate	1	0	0.2661
dbee04ae6426		0.584169	Moderate	Moderate	Severe	0	1	-0.415831
dc3c0d8ee20b		0.297258	Moderate	Moderate	Moderate	1	0	0.297258
dc6fa1b38b83		0.451032	Moderate	Proliferate_DR	Severe	0	1	-0.548968
dd110d2b8c21		0.428045	Moderate	Moderate	Moderate	1	0	0.428045
dde43aa22ae6		0.466049	Moderate	Moderate	Moderate	1	0	0.466049
de50dfa745f8		0.438503	Moderate	Moderate	No_DR	0	1	-0.561497
de778495a1cd		0.55434	Moderate	Moderate	Moderate	1	0	0.55434
dee687c6e88a		0.280604	Moderate	Moderate	Moderate	1	0	0.280604
df3adfd6ba36		0.323187	Moderate	Moderate	Severe	0	1	-0.676813
df5ce3ea7820		0.468131	Moderate	Moderate	Moderate	1	0	0.468131
df8365d6ac33		0.450362	Moderate	Moderate	Moderate	1	0	0.450362
df841a0440d8		0.294177	Moderate	Mild	Mild	1	1	-0.705823
e03e70bc8bba		0.659751	Moderate	Mild	Moderate	0	1	-0.340249
e06d3d4733f0		0.10997	Moderate	Moderate	Moderate	1	0	0.10997
e0863b353093		0.385415	Moderate	Moderate	Moderate	1	0	0.385415
e10190a9d52f		0.327494	Moderate	Moderate	Moderate	1	0	0.327494
e12b67835e03		0.399061	Moderate	No_DR	No_DR	1	1	-0.600939
e12d41e7b221		0.451152	Moderate	Moderate	Moderate	1	0	0.451152
e1418d28d668		0.539111	Moderate	No_DR	Moderate	0	1	-0.460889
e150935f66a6		0.671468	Moderate	No_DR	Mild	0	1	-0.328532
e16fc934069f		0.368899	Moderate	Moderate	Moderate	1	0	0.368899
e17507a4a1f5		0.401724	Moderate	Mild	Moderate	0	1	-0.598276
e1e490773462		0.232658	Moderate	Moderate	Moderate	1	0	0.232658
e2161692a0b4		0.474235	Moderate	No_DR	Mild	0	1	-0.525765
e229aca862c7		0.06285	Moderate	Moderate	Moderate	1	0	0.06285
e265c870f9b3		0.605553	Moderate	Moderate	Proliferate_DR	0	1	-0.394447
e2856afe62c5		0.63037	Moderate	Moderate	Moderate	1	0	0.63037
e2a47a74e6e1		0.14856	Moderate	Moderate	Moderate	1	0	0.14856
e31c42a8652b		0.503754	Moderate	Moderate	Moderate	1	0	0.503754
e34fa07bd64d		0.332262	Moderate	Moderate	Proliferate_DR	0	1	-0.667738
e387311a840e		0.173984	Moderate	Moderate	Moderate	1	0	0.173984
e3a7671f787b		0.19994	Moderate	Moderate	Moderate	1	0	0.19994
e3e490babc0c		0.563729	Moderate	Moderate	Moderate	1	0	0.563729
e4151feb8443		0.494365	Moderate	Proliferate_DR	Proliferate_DR	1	1	-0.505635
e499434242cc		0.378214	Moderate	Moderate	Moderate	1	0	0.378214
e4e343eaae2a		0.294844	Moderate	Moderate	Moderate	1	0	0.294844
e540d2e35d15		0.504582	Moderate	Moderate	Moderate	1	0	0.504582
e599151ca14b		0.27925	Moderate	Moderate	Moderate	1	0	0.27925
e5d56f4f359b		0.272049	Moderate	Moderate	Moderate	1	0	0.272049
e65a2ff90494		0.317065	Moderate	Moderate	Moderate	1	0	0.317065
e65f94ad9be3		0.067016	Moderate	Moderate	Moderate	1	0	0.067016
e663c6627a95		0.55594	Moderate	Moderate	Moderate	1	0	0.55594
e6a58edc5b42		0.451397	Moderate	Moderate	Moderate	1	0	0.451397
e6a6acf7fca1		0.378783	Moderate	Moderate	Moderate	1	0	0.378783
e6f0ce5bf282		0.477385	Moderate	Moderate	Moderate	1	0	0.477385
e724866f5084		0.202059	Moderate	Moderate	Moderate	1	0	0.202059
e756495c11cb		0.446487	Moderate	Moderate	Moderate	1	0	0.446487
e7a372a1c3a4		0.618596	Moderate	Mild	Moderate	0	1	-0.381404
e7a7187066ad		0.27456	Moderate	Moderate	Moderate	1	0	0.27456
e7defafeb957		0.240916	Moderate	Moderate	Moderate	1	0	0.240916
e7fc93ac5b6d		0.355804	Moderate	Moderate	Proliferate_DR	0	1	-0.644196
e811f39a1243		0.604594	Moderate	Mild	Moderate	0	1	-0.395406
e83d315d8f98		0.471943	Moderate	Moderate	Moderate	1	0	0.471943
e85d410d6836		0.340188	Moderate	Moderate	Moderate	1	0	0.340188
e868c3da340b		0.438134	Moderate	Moderate	Moderate	1	0	0.438134
e9129ce55fd7		0.112636	Moderate	No_DR	No_DR	1	1	-0.887364
e96099b961b4		0.429141	Moderate	Moderate	Moderate	1	0	0.429141
e9f82b5bbaf4		0.351379	Moderate	Moderate	Moderate	1	0	0.351379
ea05c22d92e9		0.370634	Moderate	Moderate	Moderate	1	0	0.370634
ea1d045f9fea		0.524527	Moderate	Moderate	Moderate	1	0	0.524527
ea4dcb055139		0	Moderate	Severe	Severe	1	1	-1
ea588d1e5d96		0.439447	Moderate	Moderate	Moderate	1	0	0.439447
ea9e0fb6fb0b		0.359291	Moderate	Moderate	Moderate	1	0	0.359291
eadfc8809ec8		0.317541	Moderate	Moderate	Moderate	1	0	0.317541
eae901557a84		0.293135	Moderate	Moderate	Moderate	1	0	0.293135
eb1ad14dd281		0.15402	Moderate	Moderate	Proliferate_DR	0	1	-0.84598
eb32a815f78c		0.166167	Moderate	Moderate	Severe	0	1	-0.833833
ed2c06fcc573		0.351129	Moderate	Moderate	Moderate	1	0	0.351129
ed88faaa325a		0.402182	Moderate	Moderate	Moderate	1	0	0.402182
ee02294cc3d9		0.368134	Moderate	Moderate	Moderate	1	0	0.368134
ee059945b08a		0.099837	Moderate	Moderate	No_DR	0	1	-0.900163
ee2c2a5f7d0e		0.304457	Moderate	Moderate	Moderate	1	0	0.304457
ee6e39319b39		0.199543	Moderate	Moderate	Moderate	1	0	0.199543
ee74c3b177e0		0.096795	Moderate	Proliferate_DR	Severe	0	1	-0.903205
ef7a4ed8d5d1		0.102796	Moderate	Moderate	Severe	0	1	-0.897204
efff2f1a35f5		0.434757	Moderate	Mild	Moderate	0	1	-0.565243
f0800723bc63		0.42261	Moderate	Moderate	Moderate	1	0	0.42261
f0c0f7b5e820		0.267653	Moderate	Moderate	Mild	0	1	-0.732347
f18abfa690ab		0.44751	Moderate	Moderate	Mild	0	1	-0.55249
f1a761c68559		0.337144	Moderate	Moderate	Moderate	1	0	0.337144
f2094a20b275		0.319675	Moderate	Moderate	Moderate	1	0	0.319675
f23902998c21		0.49691	Moderate	Moderate	Moderate	1	0	0.49691
f2ee81781411		0.189273	Moderate	Moderate	Moderate	1	0	0.189273
f30f203ef51e		0.243052	Moderate	Moderate	Moderate	1	0	0.243052
f3a268d2726d		0.023443	Moderate	No_DR	Moderate	0	1	-0.976557
f3a88d3026dc		0.566656	Moderate	Moderate	Moderate	1	0	0.566656
f3b6b7ca1eb1		0.512257	Moderate	Mild	Moderate	0	1	-0.487743
f3cd489acbee		0.620759	Moderate	Moderate	Moderate	1	0	0.620759
f45f1485c940		0.232393	Moderate	Moderate	Moderate	1	0	0.232393
f460608cf4cc		0.250732	Moderate	Moderate	Moderate	1	0	0.250732
f4d3777f2710		0.390586	Moderate	Moderate	Moderate	1	0	0.390586
f583a722434c		0.175181	Moderate	No_DR	Moderate	0	1	-0.824819
f5e9a307288c		0.452413	Moderate	Moderate	Moderate	1	0	0.452413
f61bf44c677c		0.326995	Moderate	Moderate	Moderate	1	0	0.326995
f69400b316a7		0.559676	Moderate	Moderate	Moderate	1	0	0.559676
f7edc074f06b		0.521114	Moderate	Severe	Severe	1	1	-0.478886
f80118bbda18		0.237289	Moderate	Moderate	No_DR	0	1	-0.762711
f8372e80f731		0.712872	Moderate	Moderate	Moderate	1	0	0.712872
f8fc411092c7		0.394377	Moderate	Moderate	Moderate	1	0	0.394377
f920ccd926db		0.355763	Moderate	Moderate	Moderate	1	0	0.355763
f999c6921e6d		0.350289	Moderate	Moderate	Moderate	1	0	0.350289
f9aa35187bf3		0.656203	Moderate	No_DR	No_DR	1	1	-0.343797
f9e779a13204		0.234401	Moderate	Proliferate_DR	Moderate	0	1	-0.765599
f9ecf1795804		0.371024	Moderate	Moderate	Moderate	1	0	0.371024
fa3e544a7401		0.253567	Moderate	Moderate	Moderate	1	0	0.253567
fa748b57262b		0.202869	Moderate	Moderate	Moderate	1	0	0.202869
fac399455195		0.191725	Moderate	Moderate	Moderate	1	0	0.191725
fba493e17448		0.436874	Moderate	Proliferate_DR	Moderate	0	1	-0.563126
fc1b1841eadf		0.54539	Moderate	Moderate	Moderate	1	0	0.54539
fc4c2d35c6f8		0.213469	Moderate	Moderate	Moderate	1	0	0.213469
fc4d69128e7c		0	Moderate	Moderate	Moderate	1	0	0
fc603cbedb41		0.431416	Moderate	Moderate	Moderate	1	0	0.431416
fcc55ae641ae		0.31935	Moderate	Moderate	Moderate	1	0	0.31935
fd48cf452e9d		0.224922	Moderate	Moderate	Severe	0	1	-0.775078
fe37f4492920		0.626825	Moderate	Moderate	Moderate	1	0	0.626825
ff0740cb484a		0.478821	Moderate	Moderate	Moderate	1	0	0.478821
ff344e5c9341		0.562116	Moderate	Moderate	Moderate	1	0	0.562116
ff52392372d3		0.337144	Moderate	Moderate	Moderate	1	0	0.337144
ff77e8e5b5f3		0.401242	Moderate	Mild	Mild	1	1	-0.598758
ffa47f6a7bf4		0.366731	Moderate	Moderate	Moderate	1	0	0.366731
ffcf7b45f213		0.387979	Moderate	Moderate	Moderate	1	0	0.387979
ffec9a18a3ce		0.176261	Moderate	Moderate	Moderate	1	0	0.176261
						153	58	15.0155

## Sheet: Moderate_1_alexnet_mobilenetv2
		Activation Maps Consensus		Network 1	Network 2
Immagine	Immagine	Gradcam-Consensus	True_Label	Alexnet_Scratch	Densenet_Scratch	Predict_Consensus	Penalty	Trustability
c87493ed320c		0.355773	Moderate	Moderate	Moderate	1	0	0.355773
c8823cdaf7fa		0.300465	Moderate	Moderate	Moderate	1	0	0.300465
c8905b8d5cf1		0.374165	Moderate	No_DR	Moderate	0	1	-0.625835
c8a3eb9a5b52		0.186067	Moderate	Moderate	Moderate	1	0	0.186067
c9d42d7534e0		0.374435	Moderate	Moderate	Mild	0	1	-0.625565
c9f0dc2c8b43		0.367667	Moderate	Moderate	Moderate	1	0	0.367667
ca0f1a17c8e5		0.389954	Moderate	Moderate	Moderate	1	0	0.389954
ca360bec5851		0.361034	Moderate	Moderate	No_DR	0	1	-0.638966
ca7570c5925c		0.600089	Moderate	Moderate	Mild	0	1	-0.399911
ca7f5caddf96		0.242928	Moderate	Moderate	Moderate	1	0	0.242928
ca891d37a43c		0.330015	Moderate	Moderate	Moderate	1	0	0.330015
ca9c912ebad7		0.409722	Moderate	Moderate	Moderate	1	0	0.409722
cac40227d3b2		0.455087	Moderate	Moderate	Moderate	1	0	0.455087
cac80797770f		0.577179	Moderate	Mild	Mild	1	1	-0.422821
caec68f11c86		0.615691	Moderate	No_DR	No_DR	1	1	-0.384309
cb602182cde3		0.538571	Moderate	Moderate	Moderate	1	0	0.538571
cb75210abebe		0.434338	Moderate	Moderate	Moderate	1	0	0.434338
cbc2e57447c2		0.245016	Moderate	Moderate	Moderate	1	0	0.245016
cbf0394039f8		0.569048	Moderate	Moderate	Moderate	1	0	0.569048
cc1eebed9276		0.677023	Moderate	Moderate	Moderate	1	0	0.677023
cc839823755b		0.190792	Moderate	Moderate	Moderate	1	0	0.190792
cca626a0e19a		0.667008	Moderate	Moderate	Moderate	1	0	0.667008
ccd34029493d		0.40936	Moderate	Moderate	Moderate	1	0	0.40936
cd29c88c9e36		0.541651	Moderate	Moderate	Moderate	1	0	0.541651
cd3fd04d72f5		0.21359	Moderate	Moderate	Moderate	1	0	0.21359
cd4e7f9fa1a9		0.257499	Moderate	Moderate	Moderate	1	0	0.257499
cd9e2190c73f		0.285502	Moderate	Moderate	Moderate	1	0	0.285502
ce887b196c23		0.285473	Moderate	Moderate	Moderate	1	0	0.285473
ceaa5803d780		0.29757	Moderate	Moderate	Moderate	1	0	0.29757
ceb601fe8dba		0.310144	Moderate	Moderate	Moderate	1	0	0.310144
cf0824f53dd9		0.521545	Moderate	Moderate	Severe	0	1	-0.478455
d10d315f123f		0.310092	Moderate	Moderate	Proliferate_DR	0	1	-0.689908
d141728fa392		0.162545	Moderate	Moderate	Mild	0	1	-0.837455
d144144a2f3f		0.2158	Moderate	Moderate	Moderate	1	0	0.2158
d15ca3469b87		0.07364	Moderate	No_DR	Severe	0	1	-0.92636
d18aea8238a0		0.245307	Moderate	Moderate	Proliferate_DR	0	1	-0.754693
d18b1d8ac4de		0.405718	Moderate	Moderate	Moderate	1	0	0.405718
d18e5b68f6d2		0.298142	Moderate	Moderate	Moderate	1	0	0.298142
d1f1ea894da1		0.579476	Moderate	Moderate	Proliferate_DR	0	1	-0.420524
d1fb4efb117c		0.473615	Moderate	Moderate	Moderate	1	0	0.473615
d25b8a8ad3c4		0.313355	Moderate	Moderate	Moderate	1	0	0.313355
d264396d8d1a		0.370929	Moderate	Moderate	Moderate	1	0	0.370929
d28bd830c171		0.566845	Moderate	Moderate	Proliferate_DR	0	1	-0.433155
d29096bd94aa		0.340056	Moderate	Moderate	Mild	0	1	-0.659944
d2c6b99ef62c		0.41847	Moderate	Moderate	Moderate	1	0	0.41847
d364423ec6f9		0.485577	Moderate	Moderate	Proliferate_DR	0	1	-0.514423
d3be5346684b		0	Moderate	No_DR	No_DR	1	1	-1
d3d578fe433f		0.41408	Moderate	Moderate	Moderate	1	0	0.41408
d41b33fcb94f		0.697399	Moderate	Moderate	Severe	0	1	-0.302601
d473f6fafba0		0.398	Moderate	Mild	Moderate	0	1	-0.602
d4be0403e6ab		0.661944	Moderate	No_DR	No_DR	1	1	-0.338056
d5a39339ff3d		0.407442	Moderate	Moderate	Proliferate_DR	0	1	-0.592558
d6228d951958		0.272011	Moderate	Moderate	Moderate	1	0	0.272011
d6283ded6aea		0.352176	Moderate	Moderate	Moderate	1	0	0.352176
d67374d3fa2a		0.786393	Moderate	Moderate	Moderate	1	0	0.786393
d81338217fc5		0.117658	Moderate	Moderate	Moderate	1	0	0.117658
d81b6ed83bc2		0.21359	Moderate	Moderate	Moderate	1	0	0.21359
d83c3efade75		0.53319	Moderate	Moderate	Proliferate_DR	0	1	-0.46681
d83d0695e215		0.476797	Moderate	Moderate	Moderate	1	0	0.476797
d8404680bba6		0.337067	Moderate	No_DR	No_DR	1	1	-0.662933
d85a842d20bd		0.324407	Moderate	Moderate	Moderate	1	0	0.324407
d88806d9ece9		0.104549	Moderate	Moderate	Moderate	1	0	0.104549
d8cdb7d7283a		0.723772	Moderate	Severe	Moderate	0	1	-0.276228
d91273efb92a		0.453343	Moderate	Moderate	Moderate	1	0	0.453343
d9311f7497cb		0.312672	Moderate	Moderate	Mild	0	1	-0.687328
d94e10f42861		0.42363	Moderate	Moderate	Moderate	1	0	0.42363
d952dbfb0fe4		0.352102	Moderate	Moderate	Moderate	1	0	0.352102
d95959798b57		0.239848	Moderate	Moderate	Proliferate_DR	0	1	-0.760152
d968a983d4d2		0.082875	Moderate	Moderate	Moderate	1	0	0.082875
d990a3f0cbdb		0.179192	Moderate	Moderate	Moderate	1	0	0.179192
d994203deb64		0.462307	Moderate	Moderate	Moderate	1	0	0.462307
d9a475dfe59a		0.616006	Moderate	Moderate	Mild	0	1	-0.383994
d9bbdc33db83		0.488816	Moderate	Moderate	Moderate	1	0	0.488816
da0a1043abf7		0.492684	Moderate	Moderate	Proliferate_DR	0	1	-0.507316
da44f80b422b		0.404597	Moderate	Severe	Moderate	0	1	-0.595403
da8900ac7f29		0.461919	Moderate	Moderate	Moderate	1	0	0.461919
daeaa5d8cf70		0.146013	Moderate	Moderate	Moderate	1	0	0.146013
db49cdf1ea64		0.477001	Moderate	Moderate	Mild	0	1	-0.522999
dbee04ae6426		0.448154	Moderate	Moderate	Moderate	1	0	0.448154
dc3c0d8ee20b		0.330015	Moderate	Moderate	Moderate	1	0	0.330015
dc6fa1b38b83		0.617857	Moderate	Proliferate_DR	Proliferate_DR	1	1	-0.382143
dd110d2b8c21		0.393625	Moderate	Moderate	Moderate	1	0	0.393625
dde43aa22ae6		0.367644	Moderate	Moderate	Proliferate_DR	0	1	-0.632356
de50dfa745f8		0.216624	Moderate	Moderate	Moderate	1	0	0.216624
de778495a1cd		0.579371	Moderate	Moderate	Moderate	1	0	0.579371
dee687c6e88a		0.350134	Moderate	Moderate	Moderate	1	0	0.350134
df3adfd6ba36		0.229132	Moderate	Moderate	No_DR	0	1	-0.770868
df5ce3ea7820		0.415431	Moderate	Moderate	Moderate	1	0	0.415431
df8365d6ac33		0.483651	Moderate	Moderate	Moderate	1	0	0.483651
df841a0440d8		0.381528	Moderate	Mild	Proliferate_DR	0	1	-0.618472
e03e70bc8bba		0.405731	Moderate	Mild	Mild	1	1	-0.594269
e06d3d4733f0		0.160565	Moderate	Moderate	Moderate	1	0	0.160565
e0863b353093		0.38517	Moderate	Moderate	Moderate	1	0	0.38517
e10190a9d52f		0.367336	Moderate	Moderate	Moderate	1	0	0.367336
e12b67835e03		0.402257	Moderate	No_DR	No_DR	1	1	-0.597743
e12d41e7b221		0.514403	Moderate	Moderate	Mild	0	1	-0.485597
e1418d28d668		0.458519	Moderate	No_DR	Moderate	0	1	-0.541481
e150935f66a6		0.587612	Moderate	No_DR	No_DR	1	1	-0.412388
e16fc934069f		0.354774	Moderate	Moderate	Moderate	1	0	0.354774
e17507a4a1f5		0.575706	Moderate	Mild	No_DR	0	1	-0.424294
e1e490773462		0.289422	Moderate	Moderate	Moderate	1	0	0.289422
e2161692a0b4		0.446961	Moderate	No_DR	Moderate	0	1	-0.553039
e229aca862c7		0.084746	Moderate	Moderate	Moderate	1	0	0.084746
e265c870f9b3		0.420726	Moderate	Moderate	Moderate	1	0	0.420726
e2856afe62c5		0.68068	Moderate	Moderate	Moderate	1	0	0.68068
e2a47a74e6e1		0.349994	Moderate	Moderate	Proliferate_DR	0	1	-0.650006
e31c42a8652b		0.425105	Moderate	Moderate	Severe	0	1	-0.574895
e34fa07bd64d		0.254962	Moderate	Moderate	Proliferate_DR	0	1	-0.745038
e387311a840e		0.1762	Moderate	Moderate	Mild	0	1	-0.8238
e3a7671f787b		0.304525	Moderate	Moderate	Moderate	1	0	0.304525
e3e490babc0c		0.487897	Moderate	Moderate	Moderate	1	0	0.487897
e4151feb8443		0.401676	Moderate	Proliferate_DR	Proliferate_DR	1	1	-0.598324
e499434242cc		0.389075	Moderate	Moderate	Moderate	1	0	0.389075
e4e343eaae2a		0.388549	Moderate	Moderate	Moderate	1	0	0.388549
e540d2e35d15		0.776519	Moderate	Moderate	Mild	0	1	-0.223481
e599151ca14b		0.265685	Moderate	Moderate	Proliferate_DR	0	1	-0.734315
e5d56f4f359b		0.278716	Moderate	Moderate	Proliferate_DR	0	1	-0.721284
e65a2ff90494		0.136717	Moderate	Moderate	Moderate	1	0	0.136717
e65f94ad9be3		0.146005	Moderate	Moderate	Moderate	1	0	0.146005
e663c6627a95		0.466628	Moderate	Moderate	Proliferate_DR	0	1	-0.533372
e6a58edc5b42		0.514157	Moderate	Moderate	Mild	0	1	-0.485843
e6a6acf7fca1		0.412877	Moderate	Moderate	Moderate	1	0	0.412877
e6f0ce5bf282		0.425523	Moderate	Moderate	Moderate	1	0	0.425523
e724866f5084		0.236271	Moderate	Moderate	Moderate	1	0	0.236271
e756495c11cb		0.517553	Moderate	Moderate	Moderate	1	0	0.517553
e7a372a1c3a4		0.681794	Moderate	Mild	Proliferate_DR	0	1	-0.318206
e7a7187066ad		0.285473	Moderate	Moderate	Moderate	1	0	0.285473
e7defafeb957		0.396449	Moderate	Moderate	No_DR	0	1	-0.603551
e7fc93ac5b6d		0.197181	Moderate	Moderate	Proliferate_DR	0	1	-0.802819
e811f39a1243		0.687571	Moderate	Mild	Mild	1	1	-0.312429
e83d315d8f98		0.41676	Moderate	Moderate	Severe	0	1	-0.58324
e85d410d6836		0.391315	Moderate	Moderate	Moderate	1	0	0.391315
e868c3da340b		0.534208	Moderate	Moderate	Moderate	1	0	0.534208
e9129ce55fd7		0.521877	Moderate	No_DR	Moderate	0	1	-0.478123
e96099b961b4		0.378425	Moderate	Moderate	Moderate	1	0	0.378425
e9f82b5bbaf4		0.400292	Moderate	Moderate	Moderate	1	0	0.400292
ea05c22d92e9		0.389954	Moderate	Moderate	Moderate	1	0	0.389954
ea1d045f9fea		0.434514	Moderate	Moderate	Moderate	1	0	0.434514
ea4dcb055139		0.385052	Moderate	Severe	Severe	1	1	-0.614948
ea588d1e5d96		0.530988	Moderate	Moderate	Moderate	1	0	0.530988
ea9e0fb6fb0b		0.31194	Moderate	Moderate	Moderate	1	0	0.31194
eadfc8809ec8		0.517553	Moderate	Moderate	Moderate	1	0	0.517553
eae901557a84		0.387656	Moderate	Moderate	Moderate	1	0	0.387656
eb1ad14dd281		0.186061	Moderate	Moderate	Proliferate_DR	0	1	-0.813939
eb32a815f78c		0.435641	Moderate	Moderate	Moderate	1	0	0.435641
ed2c06fcc573		0.46821	Moderate	Moderate	Mild	0	1	-0.53179
ed88faaa325a		0.421209	Moderate	Moderate	Moderate	1	0	0.421209
ee02294cc3d9		0.506184	Moderate	Moderate	Moderate	1	0	0.506184
ee059945b08a		0.027038	Moderate	Moderate	No_DR	0	1	-0.972962
ee2c2a5f7d0e		0.277982	Moderate	Moderate	Proliferate_DR	0	1	-0.722018
ee6e39319b39		0.274019	Moderate	Moderate	Moderate	1	0	0.274019
ee74c3b177e0		0.286715	Moderate	Proliferate_DR	Moderate	0	1	-0.713285
ef7a4ed8d5d1		0.343509	Moderate	Moderate	Severe	0	1	-0.656491
efff2f1a35f5		0.498079	Moderate	Mild	Moderate	0	1	-0.501921
f0800723bc63		0.422983	Moderate	Moderate	Moderate	1	0	0.422983
f0c0f7b5e820		0.255312	Moderate	Moderate	Moderate	1	0	0.255312
f18abfa690ab		0.547848	Moderate	Moderate	Moderate	1	0	0.547848
f1a761c68559		0.276196	Moderate	Moderate	Moderate	1	0	0.276196
f2094a20b275		0.387359	Moderate	Moderate	Moderate	1	0	0.387359
f23902998c21		0.438469	Moderate	Moderate	Moderate	1	0	0.438469
f2ee81781411		0.251481	Moderate	Moderate	Moderate	1	0	0.251481
f30f203ef51e		0.350645	Moderate	Moderate	Moderate	1	0	0.350645
f3a268d2726d		0.222875	Moderate	No_DR	Moderate	0	1	-0.777125
f3a88d3026dc		0.456887	Moderate	Moderate	No_DR	0	1	-0.543113
f3b6b7ca1eb1		0.45226	Moderate	Mild	Mild	1	1	-0.54774
f3cd489acbee		0.523405	Moderate	Moderate	Moderate	1	0	0.523405
f45f1485c940		0.309586	Moderate	Moderate	Moderate	1	0	0.309586
f460608cf4cc		0.287963	Moderate	Moderate	Moderate	1	0	0.287963
f4d3777f2710		0.376187	Moderate	Moderate	Moderate	1	0	0.376187
f583a722434c		0.574002	Moderate	No_DR	Moderate	0	1	-0.425998
f5e9a307288c		0.470313	Moderate	Moderate	Moderate	1	0	0.470313
f61bf44c677c		0.413106	Moderate	Moderate	Proliferate_DR	0	1	-0.586894
f69400b316a7		0.532855	Moderate	Moderate	Moderate	1	0	0.532855
f7edc074f06b		0.456738	Moderate	Severe	Severe	1	1	-0.543262
f80118bbda18		0.3015	Moderate	Moderate	Moderate	1	0	0.3015
f8372e80f731		0.651884	Moderate	Moderate	Moderate	1	0	0.651884
f8fc411092c7		0.370755	Moderate	Moderate	Moderate	1	0	0.370755
f920ccd926db		0.384512	Moderate	Moderate	Moderate	1	0	0.384512
f999c6921e6d		0.177263	Moderate	Moderate	Moderate	1	0	0.177263
f9aa35187bf3		0.657546	Moderate	No_DR	No_DR	1	1	-0.342454
f9e779a13204		0.213449	Moderate	Proliferate_DR	Moderate	0	1	-0.786551
f9ecf1795804		0.566845	Moderate	Moderate	Proliferate_DR	0	1	-0.433155
fa3e544a7401		0.183169	Moderate	Moderate	Moderate	1	0	0.183169
fa748b57262b		0.199658	Moderate	Moderate	Moderate	1	0	0.199658
fac399455195		0.106832	Moderate	Moderate	Mild	0	1	-0.893168
fba493e17448		0.17405	Moderate	Proliferate_DR	Moderate	0	1	-0.82595
fc1b1841eadf		0.397604	Moderate	Moderate	Moderate	1	0	0.397604
fc4c2d35c6f8		0.322045	Moderate	Moderate	Moderate	1	0	0.322045
fc4d69128e7c		0.001903	Moderate	Moderate	Proliferate_DR	0	1	-0.998097
fc603cbedb41		0.512895	Moderate	Moderate	Moderate	1	0	0.512895
fcc55ae641ae		0.45673	Moderate	Moderate	Moderate	1	0	0.45673
fd48cf452e9d		0.185186	Moderate	Moderate	Severe	0	1	-0.814814
fe37f4492920		0.598843	Moderate	Moderate	Proliferate_DR	0	1	-0.401157
ff0740cb484a		0.360934	Moderate	Moderate	Moderate	1	0	0.360934
ff344e5c9341		0.48337	Moderate	Moderate	Moderate	1	0	0.48337
ff52392372d3		0.276196	Moderate	Moderate	Moderate	1	0	0.276196
ff77e8e5b5f3		0.415484	Moderate	Mild	Mild	1	1	-0.584516
ffa47f6a7bf4		0.420966	Moderate	Moderate	Moderate	1	0	0.420966
ffcf7b45f213		0.426867	Moderate	Moderate	Proliferate_DR	0	1	-0.573133
ffec9a18a3ce		0.265894	Moderate	Moderate	No_DR	0	1	-0.734106
						135	81	-3.94765

## Sheet: Moderate_1_alexnet_resnet18
		Activation Maps Consensus		Network 1	Network 2
Immagine	Immagine	Gradcam-Consensus	True_Label	Alexnet_Scratch	Densenet_Scratch	Predict_Consensus	Penalty	Trustability
c87493ed320c		0.232494	Moderate	Moderate	Moderate	1	0	0.232494
c8823cdaf7fa		0.201348	Moderate	Moderate	Moderate	1	0	0.201348
c8905b8d5cf1		0.26218	Moderate	No_DR	No_DR	1	1	-0.73782
c8a3eb9a5b52		0.213635	Moderate	Moderate	Moderate	1	0	0.213635
c9d42d7534e0		0.430943	Moderate	Moderate	Severe	0	1	-0.569057
c9f0dc2c8b43		0.399514	Moderate	Moderate	Moderate	1	0	0.399514
ca0f1a17c8e5		0.276674	Moderate	Moderate	Moderate	1	0	0.276674
ca360bec5851		0.354285	Moderate	Moderate	Moderate	1	0	0.354285
ca7570c5925c		0.51625	Moderate	Moderate	Moderate	1	0	0.51625
ca7f5caddf96		0.147774	Moderate	Moderate	Severe	0	1	-0.852226
ca891d37a43c		0.333019	Moderate	Moderate	Moderate	1	0	0.333019
ca9c912ebad7		0.327381	Moderate	Moderate	Moderate	1	0	0.327381
cac40227d3b2		0.356999	Moderate	Moderate	Moderate	1	0	0.356999
cac80797770f		0.473032	Moderate	Mild	No_DR	0	1	-0.526968
caec68f11c86		0.510656	Moderate	No_DR	No_DR	1	1	-0.489344
cb602182cde3		0.284907	Moderate	Moderate	Moderate	1	0	0.284907
cb75210abebe		0.461467	Moderate	Moderate	Moderate	1	0	0.461467
cbc2e57447c2		0.29052	Moderate	Moderate	Moderate	1	0	0.29052
cbf0394039f8		0.614824	Moderate	Moderate	Mild	0	1	-0.385176
cc1eebed9276		0.407281	Moderate	Moderate	Moderate	1	0	0.407281
cc839823755b		0.237944	Moderate	Moderate	Moderate	1	0	0.237944
cca626a0e19a		0.62293	Moderate	Moderate	Mild	0	1	-0.37707
ccd34029493d		0.339879	Moderate	Moderate	Moderate	1	0	0.339879
cd29c88c9e36		0.379581	Moderate	Moderate	Moderate	1	0	0.379581
cd3fd04d72f5		0.401876	Moderate	Moderate	Moderate	1	0	0.401876
cd4e7f9fa1a9		0.419988	Moderate	Moderate	Moderate	1	0	0.419988
cd9e2190c73f		0.523625	Moderate	Moderate	Mild	0	1	-0.476375
ce887b196c23		0.333623	Moderate	Moderate	Proliferate_DR	0	1	-0.666377
ceaa5803d780		0.344745	Moderate	Moderate	Moderate	1	0	0.344745
ceb601fe8dba		0.242339	Moderate	Moderate	Moderate	1	0	0.242339
cf0824f53dd9		0.541381	Moderate	Moderate	Moderate	1	0	0.541381
d10d315f123f		0.340743	Moderate	Moderate	Mild	0	1	-0.659257
d141728fa392		0.101137	Moderate	Moderate	Moderate	1	0	0.101137
d144144a2f3f		0.447973	Moderate	Moderate	Moderate	1	0	0.447973
d15ca3469b87		0.259867	Moderate	No_DR	Moderate	0	1	-0.740133
d18aea8238a0		0.226195	Moderate	Moderate	Moderate	1	0	0.226195
d18b1d8ac4de		0.272047	Moderate	Moderate	Severe	0	1	-0.727953
d18e5b68f6d2		0.313906	Moderate	Moderate	Severe	0	1	-0.686094
d1f1ea894da1		0.550218	Moderate	Moderate	Proliferate_DR	0	1	-0.449782
d1fb4efb117c		0.544377	Moderate	Moderate	Moderate	1	0	0.544377
d25b8a8ad3c4		0.442924	Moderate	Moderate	Moderate	1	0	0.442924
d264396d8d1a		0.242926	Moderate	Moderate	Moderate	1	0	0.242926
d28bd830c171		0.538527	Moderate	Moderate	Moderate	1	0	0.538527
d29096bd94aa		0.20372	Moderate	Moderate	Severe	0	1	-0.79628
d2c6b99ef62c		0.408974	Moderate	Moderate	Moderate	1	0	0.408974
d364423ec6f9		0.511605	Moderate	Moderate	Moderate	1	0	0.511605
d3be5346684b		0	Moderate	No_DR	No_DR	1	1	-1
d3d578fe433f		0.461368	Moderate	Moderate	Moderate	1	0	0.461368
d41b33fcb94f		0.522129	Moderate	Moderate	Proliferate_DR	0	1	-0.477871
d473f6fafba0		0.282189	Moderate	Mild	Moderate	0	1	-0.717811
d4be0403e6ab		0.290862	Moderate	No_DR	No_DR	1	1	-0.709138
d5a39339ff3d		0.381573	Moderate	Moderate	Moderate	1	0	0.381573
d6228d951958		0.321384	Moderate	Moderate	Moderate	1	0	0.321384
d6283ded6aea		0.368731	Moderate	Moderate	Moderate	1	0	0.368731
d67374d3fa2a		0.637528	Moderate	Moderate	No_DR	0	1	-0.362472
d81338217fc5		0.032347	Moderate	Moderate	No_DR	0	1	-0.967653
d81b6ed83bc2		0.401876	Moderate	Moderate	Moderate	1	0	0.401876
d83c3efade75		0.441221	Moderate	Moderate	Moderate	1	0	0.441221
d83d0695e215		0.50852	Moderate	Moderate	Moderate	1	0	0.50852
d8404680bba6		0.185499	Moderate	No_DR	No_DR	1	1	-0.814501
d85a842d20bd		0.399353	Moderate	Moderate	Moderate	1	0	0.399353
d88806d9ece9		0.337499	Moderate	Moderate	Moderate	1	0	0.337499
d8cdb7d7283a		0.539421	Moderate	Severe	Moderate	0	1	-0.460579
d91273efb92a		0.478323	Moderate	Moderate	Moderate	1	0	0.478323
d9311f7497cb		0.320268	Moderate	Moderate	Moderate	1	0	0.320268
d94e10f42861		0.450417	Moderate	Moderate	Moderate	1	0	0.450417
d952dbfb0fe4		0.326142	Moderate	Moderate	Moderate	1	0	0.326142
d95959798b57		0.404778	Moderate	Moderate	Moderate	1	0	0.404778
d968a983d4d2		0.078368	Moderate	Moderate	Moderate	1	0	0.078368
d990a3f0cbdb		0.314196	Moderate	Moderate	Moderate	1	0	0.314196
d994203deb64		0.411575	Moderate	Moderate	Moderate	1	0	0.411575
d9a475dfe59a		0.452013	Moderate	Moderate	Moderate	1	0	0.452013
d9bbdc33db83		0.333512	Moderate	Moderate	Moderate	1	0	0.333512
da0a1043abf7		0.53667	Moderate	Moderate	Moderate	1	0	0.53667
da44f80b422b		0.286269	Moderate	Severe	Proliferate_DR	0	1	-0.713731
da8900ac7f29		0.502693	Moderate	Moderate	Moderate	1	0	0.502693
daeaa5d8cf70		0.157695	Moderate	Moderate	Moderate	1	0	0.157695
db49cdf1ea64		0.190197	Moderate	Moderate	Moderate	1	0	0.190197
dbee04ae6426		0.253699	Moderate	Moderate	Moderate	1	0	0.253699
dc3c0d8ee20b		0.333019	Moderate	Moderate	Moderate	1	0	0.333019
dc6fa1b38b83		0.473093	Moderate	Proliferate_DR	Moderate	0	1	-0.526907
dd110d2b8c21		0.377065	Moderate	Moderate	Moderate	1	0	0.377065
dde43aa22ae6		0.534986	Moderate	Moderate	Moderate	1	0	0.534986
de50dfa745f8		0.077208	Moderate	Moderate	No_DR	0	1	-0.922792
de778495a1cd		0.573816	Moderate	Moderate	Moderate	1	0	0.573816
dee687c6e88a		0.337173	Moderate	Moderate	Moderate	1	0	0.337173
df3adfd6ba36		0.289836	Moderate	Moderate	No_DR	0	1	-0.710164
df5ce3ea7820		0.393394	Moderate	Moderate	Moderate	1	0	0.393394
df8365d6ac33		0.449546	Moderate	Moderate	Moderate	1	0	0.449546
df841a0440d8		0.218812	Moderate	Mild	Moderate	0	1	-0.781188
e03e70bc8bba		0.462302	Moderate	Mild	Mild	1	1	-0.537698
e06d3d4733f0		0.162007	Moderate	Moderate	Moderate	1	0	0.162007
e0863b353093		0.398821	Moderate	Moderate	Moderate	1	0	0.398821
e10190a9d52f		0.226869	Moderate	Moderate	Moderate	1	0	0.226869
e12b67835e03		0.709356	Moderate	No_DR	No_DR	1	1	-0.290644
e12d41e7b221		0.458376	Moderate	Moderate	Moderate	1	0	0.458376
e1418d28d668		0.360144	Moderate	No_DR	Moderate	0	1	-0.639856
e150935f66a6		0.665279	Moderate	No_DR	No_DR	1	1	-0.334721
e16fc934069f		0.280428	Moderate	Moderate	Moderate	1	0	0.280428
e17507a4a1f5		0.509824	Moderate	Mild	Mild	1	1	-0.490176
e1e490773462		0.349021	Moderate	Moderate	Moderate	1	0	0.349021
e2161692a0b4		0.401254	Moderate	No_DR	Moderate	0	1	-0.598746
e229aca862c7		0.185156	Moderate	Moderate	Moderate	1	0	0.185156
e265c870f9b3		0.06365	Moderate	Moderate	Moderate	1	0	0.06365
e2856afe62c5		0.540111	Moderate	Moderate	Moderate	1	0	0.540111
e2a47a74e6e1		0.262897	Moderate	Moderate	Moderate	1	0	0.262897
e31c42a8652b		0.201671	Moderate	Moderate	Moderate	1	0	0.201671
e34fa07bd64d		0.303078	Moderate	Moderate	Moderate	1	0	0.303078
e387311a840e		0.223145	Moderate	Moderate	Severe	0	1	-0.776855
e3a7671f787b		0.274497	Moderate	Moderate	Moderate	1	0	0.274497
e3e490babc0c		0.489456	Moderate	Moderate	Moderate	1	0	0.489456
e4151feb8443		0.332992	Moderate	Proliferate_DR	Proliferate_DR	1	1	-0.667008
e499434242cc		0.407486	Moderate	Moderate	Moderate	1	0	0.407486
e4e343eaae2a		0.351293	Moderate	Moderate	Moderate	1	0	0.351293
e540d2e35d15		0.500549	Moderate	Moderate	Mild	0	1	-0.499451
e599151ca14b		0.299352	Moderate	Moderate	Moderate	1	0	0.299352
e5d56f4f359b		0.371307	Moderate	Moderate	Moderate	1	0	0.371307
e65a2ff90494		0.276556	Moderate	Moderate	Moderate	1	0	0.276556
e65f94ad9be3		0.267431	Moderate	Moderate	Moderate	1	0	0.267431
e663c6627a95		0.444021	Moderate	Moderate	Moderate	1	0	0.444021
e6a58edc5b42		0.45686	Moderate	Moderate	Moderate	1	0	0.45686
e6a6acf7fca1		0.477762	Moderate	Moderate	Moderate	1	0	0.477762
e6f0ce5bf282		0.358675	Moderate	Moderate	Moderate	1	0	0.358675
e724866f5084		0.241872	Moderate	Moderate	Moderate	1	0	0.241872
e756495c11cb		0.395076	Moderate	Moderate	Moderate	1	0	0.395076
e7a372a1c3a4		0.528518	Moderate	Mild	Mild	1	1	-0.471482
e7a7187066ad		0.333623	Moderate	Moderate	Proliferate_DR	0	1	-0.666377
e7defafeb957		0.19289	Moderate	Moderate	Mild	0	1	-0.80711
e7fc93ac5b6d		0.13176	Moderate	Moderate	No_DR	0	1	-0.86824
e811f39a1243		0.596582	Moderate	Mild	Severe	0	1	-0.403418
e83d315d8f98		0.415106	Moderate	Moderate	Moderate	1	0	0.415106
e85d410d6836		0.371505	Moderate	Moderate	Moderate	1	0	0.371505
e868c3da340b		0.449724	Moderate	Moderate	Moderate	1	0	0.449724
e9129ce55fd7		0.428015	Moderate	No_DR	No_DR	1	1	-0.571985
e96099b961b4		0.350206	Moderate	Moderate	Mild	0	1	-0.649794
e9f82b5bbaf4		0.284905	Moderate	Moderate	Mild	0	1	-0.715095
ea05c22d92e9		0.276674	Moderate	Moderate	Moderate	1	0	0.276674
ea1d045f9fea		0.383338	Moderate	Moderate	Moderate	1	0	0.383338
ea4dcb055139		0	Moderate	Severe	Moderate	0	1	-1
ea588d1e5d96		0.526818	Moderate	Moderate	Moderate	1	0	0.526818
ea9e0fb6fb0b		0.5133	Moderate	Moderate	Moderate	1	0	0.5133
eadfc8809ec8		0.361158	Moderate	Moderate	Moderate	1	0	0.361158
eae901557a84		0.203063	Moderate	Moderate	Mild	0	1	-0.796937
eb1ad14dd281		0.321215	Moderate	Moderate	Moderate	1	0	0.321215
eb32a815f78c		0.25537	Moderate	Moderate	Moderate	1	0	0.25537
ed2c06fcc573		0.476452	Moderate	Moderate	Moderate	1	0	0.476452
ed88faaa325a		0.432238	Moderate	Moderate	Moderate	1	0	0.432238
ee02294cc3d9		0.41215	Moderate	Moderate	Moderate	1	0	0.41215
ee059945b08a		0.161645	Moderate	Moderate	Moderate	1	0	0.161645
ee2c2a5f7d0e		0.309492	Moderate	Moderate	Moderate	1	0	0.309492
ee6e39319b39		0.399572	Moderate	Moderate	Moderate	1	0	0.399572
ee74c3b177e0		0.208632	Moderate	Proliferate_DR	Moderate	0	1	-0.791368
ef7a4ed8d5d1		0.188541	Moderate	Moderate	No_DR	0	1	-0.811459
efff2f1a35f5		0.40569	Moderate	Mild	Moderate	0	1	-0.59431
f0800723bc63		0.338572	Moderate	Moderate	Moderate	1	0	0.338572
f0c0f7b5e820		0.367772	Moderate	Moderate	Moderate	1	0	0.367772
f18abfa690ab		0.50285	Moderate	Moderate	Moderate	1	0	0.50285
f1a761c68559		0.202547	Moderate	Moderate	Moderate	1	0	0.202547
f2094a20b275		0.322151	Moderate	Moderate	Moderate	1	0	0.322151
f23902998c21		0.492696	Moderate	Moderate	Moderate	1	0	0.492696
f2ee81781411		0.340722	Moderate	Moderate	Moderate	1	0	0.340722
f30f203ef51e		0.345371	Moderate	Moderate	Moderate	1	0	0.345371
f3a268d2726d		0.192963	Moderate	No_DR	No_DR	1	1	-0.807037
f3a88d3026dc		0.479419	Moderate	Moderate	No_DR	0	1	-0.520581
f3b6b7ca1eb1		0.401089	Moderate	Mild	Moderate	0	1	-0.598911
f3cd489acbee		0.517646	Moderate	Moderate	Moderate	1	0	0.517646
f45f1485c940		0.312396	Moderate	Moderate	Moderate	1	0	0.312396
f460608cf4cc		0.294709	Moderate	Moderate	Moderate	1	0	0.294709
f4d3777f2710		0.469257	Moderate	Moderate	Moderate	1	0	0.469257
f583a722434c		0.419363	Moderate	No_DR	Moderate	0	1	-0.580637
f5e9a307288c		0.486433	Moderate	Moderate	Moderate	1	0	0.486433
f61bf44c677c		0.309691	Moderate	Moderate	Moderate	1	0	0.309691
f69400b316a7		0.473354	Moderate	Moderate	Moderate	1	0	0.473354
f7edc074f06b		0.512956	Moderate	Severe	Severe	1	1	-0.487044
f80118bbda18		0.20471	Moderate	Moderate	Moderate	1	0	0.20471
f8372e80f731		0.528389	Moderate	Moderate	Moderate	1	0	0.528389
f8fc411092c7		0.280887	Moderate	Moderate	Moderate	1	0	0.280887
f920ccd926db		0.339518	Moderate	Moderate	Moderate	1	0	0.339518
f999c6921e6d		0.097137	Moderate	Moderate	Moderate	1	0	0.097137
f9aa35187bf3		0.659832	Moderate	No_DR	No_DR	1	1	-0.340168
f9e779a13204		0.288519	Moderate	Proliferate_DR	Moderate	0	1	-0.711481
f9ecf1795804		0.538527	Moderate	Moderate	Moderate	1	0	0.538527
fa3e544a7401		0.194174	Moderate	Moderate	No_DR	0	1	-0.805826
fa748b57262b		0.354007	Moderate	Moderate	Moderate	1	0	0.354007
fac399455195		0.085001	Moderate	Moderate	Moderate	1	0	0.085001
fba493e17448		0.369462	Moderate	Proliferate_DR	Mild	0	1	-0.630538
fc1b1841eadf		0.389793	Moderate	Moderate	Moderate	1	0	0.389793
fc4c2d35c6f8		0.322075	Moderate	Moderate	Moderate	1	0	0.322075
fc4d69128e7c		0.045265	Moderate	Moderate	Severe	0	1	-0.954735
fc603cbedb41		0.523478	Moderate	Moderate	Moderate	1	0	0.523478
fcc55ae641ae		0.473935	Moderate	Moderate	Moderate	1	0	0.473935
fd48cf452e9d		0.303382	Moderate	Moderate	Moderate	1	0	0.303382
fe37f4492920		0.483672	Moderate	Moderate	Proliferate_DR	0	1	-0.516328
ff0740cb484a		0.419333	Moderate	Moderate	Moderate	1	0	0.419333
ff344e5c9341		0.480149	Moderate	Moderate	Moderate	1	0	0.480149
ff52392372d3		0.202547	Moderate	Moderate	Moderate	1	0	0.202547
ff77e8e5b5f3		0.424924	Moderate	Mild	Moderate	0	1	-0.575076
ffa47f6a7bf4		0.30661	Moderate	Moderate	Moderate	1	0	0.30661
ffcf7b45f213		0.423422	Moderate	Moderate	Moderate	1	0	0.423422
ffec9a18a3ce		0.178731	Moderate	Moderate	Moderate	1	0	0.178731
						153	62	9.88069

## Sheet: Moderate_1_alexnet_resnet50
		Activation Maps Consensus		Network 1	Network 2
Immagine	Immagine	Gradcam-Consensus	True_Label	Alexnet_Scratch	Densenet_Scratch	Predict_Consensus	Penalty	Trustability
c87493ed320c		0.247855	Moderate	Moderate	Moderate	1	0	0.247855
c8823cdaf7fa		0.34129	Moderate	Moderate	Moderate	1	0	0.34129
c8905b8d5cf1		0.034995	Moderate	No_DR	Moderate	0	1	-0.965005
c8a3eb9a5b52		0.258067	Moderate	Moderate	Moderate	1	0	0.258067
c9d42d7534e0		0.436589	Moderate	Moderate	Moderate	1	0	0.436589
c9f0dc2c8b43		0.369332	Moderate	Moderate	Moderate	1	0	0.369332
ca0f1a17c8e5		0.325502	Moderate	Moderate	Moderate	1	0	0.325502
ca360bec5851		0.379422	Moderate	Moderate	Moderate	1	0	0.379422
ca7570c5925c		0.536891	Moderate	Moderate	Mild	0	1	-0.463109
ca7f5caddf96		0.072848	Moderate	Moderate	Proliferate_DR	0	1	-0.927152
ca891d37a43c		0.25368	Moderate	Moderate	Moderate	1	0	0.25368
ca9c912ebad7		0.312739	Moderate	Moderate	Proliferate_DR	0	1	-0.687261
cac40227d3b2		0.39184	Moderate	Moderate	Moderate	1	0	0.39184
cac80797770f		0.612026	Moderate	Mild	Moderate	0	1	-0.387974
caec68f11c86		0.722575	Moderate	No_DR	No_DR	1	1	-0.277425
cb602182cde3		0.635933	Moderate	Moderate	Moderate	1	0	0.635933
cb75210abebe		0.282666	Moderate	Moderate	Proliferate_DR	0	1	-0.717334
cbc2e57447c2		0.406409	Moderate	Moderate	Moderate	1	0	0.406409
cbf0394039f8		0.414329	Moderate	Moderate	Mild	0	1	-0.585671
cc1eebed9276		0.517226	Moderate	Moderate	Moderate	1	0	0.517226
cc839823755b		0.255035	Moderate	Moderate	Moderate	1	0	0.255035
cca626a0e19a		0.547055	Moderate	Moderate	Moderate	1	0	0.547055
ccd34029493d		0.218983	Moderate	Moderate	Moderate	1	0	0.218983
cd29c88c9e36		0.404355	Moderate	Moderate	Moderate	1	0	0.404355
cd3fd04d72f5		0.307886	Moderate	Moderate	Moderate	1	0	0.307886
cd4e7f9fa1a9		0.482757	Moderate	Moderate	Moderate	1	0	0.482757
cd9e2190c73f		0.337808	Moderate	Moderate	Mild	0	1	-0.662192
ce887b196c23		0.38469	Moderate	Moderate	Moderate	1	0	0.38469
ceaa5803d780		0.297871	Moderate	Moderate	Severe	0	1	-0.702129
ceb601fe8dba		0.468627	Moderate	Moderate	Moderate	1	0	0.468627
cf0824f53dd9		0.447625	Moderate	Moderate	Moderate	1	0	0.447625
d10d315f123f		0.343754	Moderate	Moderate	Moderate	1	0	0.343754
d141728fa392		0.269254	Moderate	Moderate	Moderate	1	0	0.269254
d144144a2f3f		0.416642	Moderate	Moderate	Moderate	1	0	0.416642
d15ca3469b87		0.220659	Moderate	No_DR	Moderate	0	1	-0.779341
d18aea8238a0		0.315054	Moderate	Moderate	Moderate	1	0	0.315054
d18b1d8ac4de		0.387062	Moderate	Moderate	Mild	0	1	-0.612938
d18e5b68f6d2		0.368544	Moderate	Moderate	Moderate	1	0	0.368544
d1f1ea894da1		0.53226	Moderate	Moderate	Moderate	1	0	0.53226
d1fb4efb117c		0.535406	Moderate	Moderate	Moderate	1	0	0.535406
d25b8a8ad3c4		0.530599	Moderate	Moderate	Moderate	1	0	0.530599
d264396d8d1a		0.40488	Moderate	Moderate	Mild	0	1	-0.59512
d28bd830c171		0.389801	Moderate	Moderate	Moderate	1	0	0.389801
d29096bd94aa		0.196364	Moderate	Moderate	Mild	0	1	-0.803636
d2c6b99ef62c		0.432514	Moderate	Moderate	Moderate	1	0	0.432514
d364423ec6f9		0.453653	Moderate	Moderate	Moderate	1	0	0.453653
d3be5346684b		0.207571	Moderate	No_DR	No_DR	1	1	-0.792429
d3d578fe433f		0.557867	Moderate	Moderate	Moderate	1	0	0.557867
d41b33fcb94f		0.848557	Moderate	Moderate	Moderate	1	0	0.848557
d473f6fafba0		0.490476	Moderate	Mild	Mild	1	1	-0.509524
d4be0403e6ab		0.410106	Moderate	No_DR	No_DR	1	1	-0.589894
d5a39339ff3d		0.384821	Moderate	Moderate	Moderate	1	0	0.384821
d6228d951958		0.406123	Moderate	Moderate	Moderate	1	0	0.406123
d6283ded6aea		0.543739	Moderate	Moderate	Moderate	1	0	0.543739
d67374d3fa2a		0.741264	Moderate	Moderate	No_DR	0	1	-0.258736
d81338217fc5		0.17821	Moderate	Moderate	Proliferate_DR	0	1	-0.82179
d81b6ed83bc2		0.307886	Moderate	Moderate	Moderate	1	0	0.307886
d83c3efade75		0.509566	Moderate	Moderate	Moderate	1	0	0.509566
d83d0695e215		0.537579	Moderate	Moderate	Moderate	1	0	0.537579
d8404680bba6		0.364171	Moderate	No_DR	Moderate	0	1	-0.635829
d85a842d20bd		0.473561	Moderate	Moderate	Proliferate_DR	0	1	-0.526439
d88806d9ece9		0.224896	Moderate	Moderate	Moderate	1	0	0.224896
d8cdb7d7283a		0.000178	Moderate	Severe	Severe	1	1	-0.999822
d91273efb92a		0.00015	Moderate	Moderate	Moderate	1	0	0.00015
d9311f7497cb		0.000194	Moderate	Moderate	Moderate	1	0	0.000194
d94e10f42861		0.000167	Moderate	Moderate	Moderate	1	0	0.000167
d952dbfb0fe4		0.000179	Moderate	Moderate	Moderate	1	0	0.000179
d95959798b57		0.000134	Moderate	Moderate	Moderate	1	0	0.000134
d968a983d4d2		9.3e-05	Moderate	Moderate	Moderate	1	0	9.3e-05
d990a3f0cbdb		0.000134	Moderate	Moderate	Moderate	1	0	0.000134
d994203deb64		0.000187	Moderate	Moderate	Moderate	1	0	0.000187
d9a475dfe59a		0.000105	Moderate	Moderate	Moderate	1	0	0.000105
d9bbdc33db83		5.2e-05	Moderate	Moderate	Moderate	1	0	5.2e-05
da0a1043abf7		0.000256	Moderate	Moderate	Moderate	1	0	0.000256
da44f80b422b		0.000181	Moderate	Severe	Moderate	0	1	-0.999819
da8900ac7f29		0.00013	Moderate	Moderate	Moderate	1	0	0.00013
daeaa5d8cf70		6.7e-05	Moderate	Moderate	Moderate	1	0	6.7e-05
db49cdf1ea64		0.0002	Moderate	Moderate	Moderate	1	0	0.0002
dbee04ae6426		0.000119	Moderate	Moderate	Severe	0	1	-0.999881
dc3c0d8ee20b		0.000204	Moderate	Moderate	Moderate	1	0	0.000204
dc6fa1b38b83		0.00012	Moderate	Proliferate_DR	Severe	0	1	-0.99988
dd110d2b8c21		0.000102	Moderate	Moderate	Moderate	1	0	0.000102
dde43aa22ae6		0.000158	Moderate	Moderate	Mild	0	1	-0.999842
de50dfa745f8		0.000116	Moderate	Moderate	No_DR	0	1	-0.999884
de778495a1cd		8.8e-05	Moderate	Moderate	Severe	0	1	-0.999912
dee687c6e88a		0.00011	Moderate	Moderate	Moderate	1	0	0.00011
df3adfd6ba36		0.000121	Moderate	Moderate	Severe	0	1	-0.999879
df5ce3ea7820		0.000129	Moderate	Moderate	Moderate	1	0	0.000129
df8365d6ac33		0.000157	Moderate	Moderate	Moderate	1	0	0.000157
df841a0440d8		7.7e-05	Moderate	Mild	Mild	1	1	-0.999923
e03e70bc8bba		0.000155	Moderate	Mild	Mild	1	1	-0.999845
e06d3d4733f0		9.1e-05	Moderate	Moderate	Moderate	1	0	9.1e-05
e0863b353093		9.7e-05	Moderate	Moderate	Moderate	1	0	9.7e-05
e10190a9d52f		0.000171	Moderate	Moderate	Moderate	1	0	0.000171
e12b67835e03		0.000237	Moderate	No_DR	No_DR	1	1	-0.999763
e12d41e7b221		0.000104	Moderate	Moderate	Moderate	1	0	0.000104
e1418d28d668		0.000237	Moderate	No_DR	Moderate	0	1	-0.999763
e150935f66a6		0.000206	Moderate	No_DR	No_DR	1	1	-0.999794
e16fc934069f		0.000158	Moderate	Moderate	Moderate	1	0	0.000158
e17507a4a1f5		0.000214	Moderate	Mild	Mild	1	1	-0.999786
e1e490773462		0.000173	Moderate	Moderate	Moderate	1	0	0.000173
e2161692a0b4		0.000217	Moderate	No_DR	No_DR	1	1	-0.999783
e229aca862c7		0.000145	Moderate	Moderate	Moderate	1	0	0.000145
e265c870f9b3		0.000319	Moderate	Moderate	Moderate	1	0	0.000319
e2856afe62c5		9.5e-05	Moderate	Moderate	Proliferate_DR	0	1	-0.999905
e2a47a74e6e1		0.000152	Moderate	Moderate	Moderate	1	0	0.000152
e31c42a8652b		0.000157	Moderate	Moderate	Moderate	1	0	0.000157
e34fa07bd64d		0.000123	Moderate	Moderate	Moderate	1	0	0.000123
e387311a840e		0.000168	Moderate	Moderate	Mild	0	1	-0.999832
e3a7671f787b		0.000131	Moderate	Moderate	Moderate	1	0	0.000131
e3e490babc0c		9.7e-05	Moderate	Moderate	Moderate	1	0	9.7e-05
e4151feb8443		0.000396	Moderate	Proliferate_DR	Proliferate_DR	1	1	-0.999604
e499434242cc		0.00011	Moderate	Moderate	Moderate	1	0	0.00011
e4e343eaae2a		0.000175	Moderate	Moderate	Moderate	1	0	0.000175
e540d2e35d15		0.000235	Moderate	Moderate	Mild	0	1	-0.999765
e599151ca14b		9.7e-05	Moderate	Moderate	Moderate	1	0	9.7e-05
e5d56f4f359b		0.000122	Moderate	Moderate	Moderate	1	0	0.000122
e65a2ff90494		0.000178	Moderate	Moderate	Moderate	1	0	0.000178
e65f94ad9be3		0.000113	Moderate	Moderate	Moderate	1	0	0.000113
e663c6627a95		0.000148	Moderate	Moderate	Moderate	1	0	0.000148
e6a58edc5b42		0.000186	Moderate	Moderate	Moderate	1	0	0.000186
e6a6acf7fca1		0.000106	Moderate	Moderate	Moderate	1	0	0.000106
e6f0ce5bf282		0.000133	Moderate	Moderate	Moderate	1	0	0.000133
e724866f5084		0.000181	Moderate	Moderate	Moderate	1	0	0.000181
e756495c11cb		0.000138	Moderate	Moderate	Mild	0	1	-0.999862
e7a372a1c3a4		0.000204	Moderate	Mild	Mild	1	1	-0.999796
e7a7187066ad		0.000262	Moderate	Moderate	Moderate	1	0	0.000262
e7defafeb957		0.000175	Moderate	Moderate	Mild	0	1	-0.999825
e7fc93ac5b6d		8.5e-05	Moderate	Moderate	Moderate	1	0	8.5e-05
e811f39a1243		0.000292	Moderate	Mild	No_DR	0	1	-0.999708
e83d315d8f98		0.00018	Moderate	Moderate	Moderate	1	0	0.00018
e85d410d6836		0.000156	Moderate	Moderate	Moderate	1	0	0.000156
e868c3da340b		0.000152	Moderate	Moderate	Moderate	1	0	0.000152
e9129ce55fd7		9.3e-05	Moderate	No_DR	Moderate	0	1	-0.999907
e96099b961b4		0.000119	Moderate	Moderate	Moderate	1	0	0.000119
e9f82b5bbaf4		8.3e-05	Moderate	Moderate	Proliferate_DR	0	1	-0.999917
ea05c22d92e9		0.000177	Moderate	Moderate	Moderate	1	0	0.000177
ea1d045f9fea		0.000155	Moderate	Moderate	Moderate	1	0	0.000155
ea4dcb055139		0.000101	Moderate	Severe	Moderate	0	1	-0.999899
ea588d1e5d96		0.000111	Moderate	Moderate	Moderate	1	0	0.000111
ea9e0fb6fb0b		0.000172	Moderate	Moderate	Moderate	1	0	0.000172
eadfc8809ec8		0.000125	Moderate	Moderate	Moderate	1	0	0.000125
eae901557a84		0.000147	Moderate	Moderate	Moderate	1	0	0.000147
eb1ad14dd281		0.00019	Moderate	Moderate	Moderate	1	0	0.00019
eb32a815f78c		9.3e-05	Moderate	Moderate	Moderate	1	0	9.3e-05
ed2c06fcc573		0.000141	Moderate	Moderate	Moderate	1	0	0.000141
ed88faaa325a		0.000116	Moderate	Moderate	Moderate	1	0	0.000116
ee02294cc3d9		0.000132	Moderate	Moderate	Moderate	1	0	0.000132
ee059945b08a		7e-05	Moderate	Moderate	Proliferate_DR	0	1	-0.99993
ee2c2a5f7d0e		0.00016	Moderate	Moderate	Moderate	1	0	0.00016
ee6e39319b39		0.000195	Moderate	Moderate	Moderate	1	0	0.000195
ee74c3b177e0		0.00011	Moderate	Proliferate_DR	Proliferate_DR	1	1	-0.99989
ef7a4ed8d5d1		0.000132	Moderate	Moderate	Moderate	1	0	0.000132
efff2f1a35f5		0.000199	Moderate	Mild	Mild	1	1	-0.999801
f0800723bc63		0.000147	Moderate	Moderate	Moderate	1	0	0.000147
f0c0f7b5e820		0.000181	Moderate	Moderate	Moderate	1	0	0.000181
f18abfa690ab		0.000142	Moderate	Moderate	Proliferate_DR	0	1	-0.999858
f1a761c68559		0.000168	Moderate	Moderate	Moderate	1	0	0.000168
f2094a20b275		0.000133	Moderate	Moderate	Moderate	1	0	0.000133
f23902998c21		0.000159	Moderate	Moderate	Moderate	1	0	0.000159
f2ee81781411		0.00015	Moderate	Moderate	Moderate	1	0	0.00015
f30f203ef51e		0.000124	Moderate	Moderate	Moderate	1	0	0.000124
f3a268d2726d		9.8e-05	Moderate	No_DR	No_DR	1	1	-0.999902
f3a88d3026dc		9.9e-05	Moderate	Moderate	Proliferate_DR	0	1	-0.999901
f3b6b7ca1eb1		6.7e-05	Moderate	Mild	Moderate	0	1	-0.999933
f3cd489acbee		0.00011	Moderate	Moderate	Moderate	1	0	0.00011
f45f1485c940		0.000127	Moderate	Moderate	Mild	0	1	-0.999873
f460608cf4cc		0.000132	Moderate	Moderate	Moderate	1	0	0.000132
f4d3777f2710		0.000131	Moderate	Moderate	Moderate	1	0	0.000131
f583a722434c		0.000232	Moderate	No_DR	Mild	0	1	-0.999768
f5e9a307288c		0.000161	Moderate	Moderate	Moderate	1	0	0.000161
f61bf44c677c		0.000113	Moderate	Moderate	Moderate	1	0	0.000113
f69400b316a7		0.000173	Moderate	Moderate	Moderate	1	0	0.000173
f7edc074f06b		0.000181	Moderate	Severe	Severe	1	1	-0.999819
f80118bbda18		0.000163	Moderate	Moderate	Mild	0	1	-0.999837
f8372e80f731		0.000287	Moderate	Moderate	Moderate	1	0	0.000287
f8fc411092c7		0.000132	Moderate	Moderate	Moderate	1	0	0.000132
f920ccd926db		0.000181	Moderate	Moderate	Moderate	1	0	0.000181
f999c6921e6d		0.000146	Moderate	Moderate	Moderate	1	0	0.000146
f9aa35187bf3		0.000263	Moderate	No_DR	No_DR	1	1	-0.999737
f9e779a13204		0.000141	Moderate	Proliferate_DR	Moderate	0	1	-0.999859
f9ecf1795804		0.000136	Moderate	Moderate	Moderate	1	0	0.000136
fa3e544a7401		8.6e-05	Moderate	Moderate	Moderate	1	0	8.6e-05
fa748b57262b		0.000138	Moderate	Moderate	Moderate	1	0	0.000138
fac399455195		0.000118	Moderate	Moderate	Moderate	1	0	0.000118
fba493e17448		0.000137	Moderate	Proliferate_DR	Moderate	0	1	-0.999863
fc1b1841eadf		0.00012	Moderate	Moderate	Moderate	1	0	0.00012
fc4c2d35c6f8		0.000146	Moderate	Moderate	Moderate	1	0	0.000146
fc4d69128e7c		7e-05	Moderate	Moderate	Moderate	1	0	7e-05
fc603cbedb41		0.000129	Moderate	Moderate	Moderate	1	0	0.000129
fcc55ae641ae		0.000197	Moderate	Moderate	Moderate	1	0	0.000197
fd48cf452e9d		0.000125	Moderate	Moderate	Proliferate_DR	0	1	-0.999875
fe37f4492920		0.000177	Moderate	Moderate	Moderate	1	0	0.000177
ff0740cb484a		0.00014	Moderate	Moderate	Moderate	1	0	0.00014
ff344e5c9341		8.9e-05	Moderate	Moderate	Moderate	1	0	8.9e-05
ff52392372d3		0.000168	Moderate	Moderate	Moderate	1	0	0.000168
ff77e8e5b5f3		6.8e-05	Moderate	Mild	Proliferate_DR	0	1	-0.999932
ffa47f6a7bf4		0.000186	Moderate	Moderate	Moderate	1	0	0.000186
ffcf7b45f213		0.000191	Moderate	Moderate	Moderate	1	0	0.000191
ffec9a18a3ce		0.000205	Moderate	Moderate	No_DR	0	1	-0.999795
						154	64	-39.2915

[truncated: 160 more sheets: Moderate_1_alexnet_shufflenet, Moderate_1_alexnet_vgg16, Moderate_1_alexnet_vgg19, Moderate_1_alexnet_xception, Moderate_1_densenet_alexnet, Moderate_1_densenet_densenet, Moderate_densenet_efficientnet, Moderate_1_densenet_googlenet, Moderate_1_densenet_inceptionre, Moderate_1_densenet_inceptionv3, Moderate_1_densenet_mobilenetv2, Moderate_1_densenet_resnet18, Moderate_1_densenet_resnet50, Moderate_1_densenet_shufflenet, Moderate_1_densenet_vgg16, Moderate_1_densenet_vgg19, Moderate_1_densenet_xception, Moderate_efficientnetb0_alexnet, Moderate_efficientnetb0_densene, Moderate_efficientnetb0_efficb0 …]
