# Supplementary material for: Towards trustworthy digital health: reliability of uncertainty-aware convolutional neural networks
Source: PeerJ journal article supplement (doi:10.7717/peerj-cs.3414), 2026-01-28
Supplement: trustworthinessmain.zip [file Diabetic_Retinopathy_No_Dr.xlsx]

## Sheet: NODR_trust
	Network1	Network 2	Class	Affidabilità	n1_TPR	n1_TNR	n1_FPR	n1_FNR	n2_TPR	n2_TNR	n2_FPR	n2_FNR
	Alexnet	Alexnet	NO_DR	0.977839
	Alexnet	Densenet	NO_DR	0.569906
	Alexnet	Efficientnetb0	NO_DR	0.530553
	Alexnet	Googlenet	NO_DR	0.441344
	Alexnet	Inceptionresnetv2	NO_DR	-0.0439782
	Alexnet	Inceptionv3	NO_DR	0.336395
	Alexnet	mobilenetv2	NO_DR	0.38502
	Alexnet	resnet18	NO_DR	0.386246
	Alexnet	resnet50	NO_DR	-0.038438
	Alexnet	Shufflenet	NO_DR	0.52065
	Alexnet	vgg16	NO_DR	-0.0245876
	Alexnet	vgg19	NO_DR	0.516435
	Alexnet	xception	NO_DR	0.414827
	Densenet	Alexnet	NO_DR	0.569906
	Densenet	Densenet	NO_DR	0.966759
	Densenet	Efficientnetb0	NO_DR	0.522602
	Densenet	Googlenet	NO_DR	0.519502
	Densenet	Inceptionresnetv2	NO_DR	-0.0468635
	Densenet	inceptionv3	NO_DR	0.362407
	Densenet	mobilenetv2	NO_DR	0.361568
	Densenet	resnet18	NO_DR	0.457965
	Densenet	resnet50	NO_DR	-0.0413233
	Densenet	Shufflenet	NO_DR	0.562257
	Densenet	vgg16	NO_DR	-0.033013
	Densenet	vgg19	NO_DR	0.519916
	Densenet	xception	NO_DR	0.500611
	Efficientnetb0	Alexnet	NO_DR	0.530553
	Efficientnetb0	Densenet	NO_DR	0.522602
	Efficientnetb0	Efficientnetb0	NO_DR	0.975069
	Efficientnetb0	Googlenet	NO_DR	0.380366
	Efficientnetb0	inceptionresnetv2	NO_DR	-0.0464239
	Efficientnetb0	Inceptionv3	NO_DR	0.335773
	Efficientnetb0	mobilenetv2	NO_DR	0.4248
	Efficientnetb0	resnet18	NO_DR	0.349361
	Efficientnetb0	resnet50	NO_DR	-0.0408838
	Efficientnetb0	Shufflenet	NO_DR	0.481418
	Efficientnetb0	vgg16	NO_DR	-0.0270334
	Efficientnetb0	vgg19	NO_DR	0.598353
	Efficientnetb0	xception	NO_DR	0.395555
	Googlenet	Alexnet	NO_DR	0.441344
	Googlenet	Densenet	NO_DR	0.519502
	Googlenet	Efficientnetb0	NO_DR	0.380366
	Googlenet	Googlenet	NO_DR	0.98338
	Googlenet	inceptionresnetv2	NO_DR	-0.0413596
	Googlenet	Inceptionv3	NO_DR	0.392596
	Googlenet	mobilenetv2	NO_DR	0.338599
	Googlenet	resnet18	NO_DR	0.526553
	Googlenet	resnet50	NO_DR	-0.0358195
	Googlenet	Shufflenet	NO_DR	0.482043
	Googlenet	vgg16	NO_DR	-0.0164289
	Googlenet	vgg19	NO_DR	0.440346
	Googlenet	xception	NO_DR	0.529811
	Inceptionresnetv2	Alexnet	NO_DR	-0.0439782
	Inceptionresnetv2	Densenet	NO_DR	-0.0468635
	Inceptionresnetv2	Efficientnetb0	NO_DR	-0.0464239
	Inceptionresnetv2	Googlenet	NO_DR	-0.0413596
	Inceptionresnetv2	Inceptionresnetv2	NO_DR	0.958449
	Inceptionresnetv2	inceptionv3	NO_DR	-0.0579989
	Inceptionresnetv2	mobilenetv2	NO_DR	-0.0579486
	Inceptionresnetv2	resnet18	NO_DR	-0.0469355
	Inceptionresnetv2	resnet50	NO_DR	0.950139
	Inceptionresnetv2	Shufflenet	NO_DR	-0.044106
	Inceptionresnetv2	vgg16	NO_DR	0.958449
	Inceptionresnetv2	vgg19	NO_DR	-0.0440033
	Inceptionresnetv2	xception	NO_DR	-0.0441579
	inceptionv3	Alexnet	NO_DR	0.336395
	Incpetionv3	Densenet	NO_DR	0.362407
	Inceptionv3	Efficientnetb0	NO_DR	0.335773
	Incpetionv3	Googlenet	NO_DR	0.392596
	Incpetionv3	inceptionresnetv2	NO_DR	-0.0579989
	Inceptionv3	Inceptionv3	NO_DR	0.961219
	Inceptionv3	mobilenetv2	NO_DR	0.350961
	Inceptionv3	resnet18	NO_DR	0.448922
	Incpetionv3	resnet50	NO_DR	-0.0496887
	incpetionv3	shufflenet	NO_DR	0.380437
	inceptionv3	vgg16	NO_DR	-0.0386084
	Incpetionv3	vgg19	NO_DR	0.343794
	Inceptionv3	xception	NO_DR	0.463495
	mobilenetv2	Alexnet	NO_DR	0.38502
	mobilenetv2	Densenet	NO_DR	0.361568
	mobilenetv2	Efficientnetb0	NO_DR	0.4248
	mobilenetv2	googlenet	NO_DR	0.338599
	mobilenetv2	inceptionresnetv2	NO_DR	-0.0579486
	mobilenetv2	inceptionv3	NO_DR	0.350961
	mobilenetv2	mobilenetv2	NO_DR	0.958449
	mobilenetv2	resnet18	NO_DR	0.308284
	mobilenetv2	resnet50	NO_DR	-0.0524084
	mobilenetv2	Shufflenet	NO_DR	0.399916
	mobilenetv2	vgg16	NO_DR	-0.0440981
	mobilenetv2	vgg19	NO_DR	0.404323
	mobilenetv2	xception	NO_DR	0.340678
	resnet18	Alexnet	NO_DR	0.386246
	resnet18	Densenet	NO_DR	0.457965
	resnet18	Efficientnetb0	NO_DR	0.349361
	resnet18	Googlenet	NO_DR	0.526553
	resnet18	inceptionresnetv2	NO_DR	-0.0469355
	resnet18	inceptionv3	NO_DR	0.448922
	resnet18	mobilenetv2	NO_DR	0.308284
	resnet18	resnet18	NO_DR	0.966759
	resnet18	resnet50	NO_DR	-0.0386253
	resnet18	Shufflenet	NO_DR	0.467352
	resnet18	vgg16	NO_DR	-0.0330851
	resnet18	vgg19	NO_DR	0.374949
	resnet18	xception	NO_DR	0.553393
	resnet50	Alexnet	NO_DR	-0.038438
	resnet50	Densenet	NO_DR	-0.0413233
	resnet50	Efficientnetb0	NO_DR	-0.0408838
	resnet50	Googlenet	NO_DR	-0.0358195
	resnet50	inceptionresnetv2	NO_DR	0.950139
	resnet50	inceptionv3	NO_DR	-0.0496887
	resnet50	mobilenetv2	NO_DR	-0.0524084
	resnet50	resnet18	NO_DR	-0.0386253
	resnet50	resnet50	NO_DR	0.963989
	resnet50	shufflenet	NO_DR	-0.0385659
	resnet50	vgg16	NO_DR	0.963989
	resnet50	vgg19	NO_DR	-0.0384632
	resnet50	xception	NO_DR	-0.0386177
	shufflenet	Alexnet	NO_DR	0.52065
	shufflenet	Densenet	NO_DR	0.562257
	shufflenet	Efficientnetb0	NO_DR	0.481418
	shufflenet	Googlenet	NO_DR	0.482043
	shufflenet	inceptionresnetv2	NO_DR	-0.044106
	shufflenet	inceptionv3	NO_DR	0.380437
	shufflenet	mobilenetv2	NO_DR	0.399916
	shufflenet	resnet18	NO_DR	0.467352
	shufflenet	resnet50	NO_DR	-0.0385659
	shufflenet	Shufflenet	NO_DR	0.969529
	shufflenet	vgg16	NO_DR	-0.0302556
	shufflenet	vgg19	NO_DR	0.521221
	shufflenet	xception	NO_DR	0.485759
	vgg16	Alexnet	NO_DR	-0.0245876
	vgg16	Densenet	NO_DR	-0.033013
	vgg16	Efficientnetb0	NO_DR	-0.0270334
	vgg16	googlenet	NO_DR	-0.0164289
	vgg16	inceptionresnetv2	NO_DR	0.958449
	vgg16	inceptionv3	NO_DR	-0.0386084
	vgg16	mobilenetv2	NO_DR	-0.0440981
	vgg16	resnet18	NO_DR	-0.0330851
	vgg16	resnet50	NO_DR	0.963989
	vgg16	Shufflenet	NO_DR	-0.0302556
	vgg16	vgg16	NO_DR	0.99169
	vgg16	vgg19	NO_DR	-0.0135324
	vgg16	xception	NO_DR	-0.0303075
	vgg19	Alexnet	NO_DR	0.516435
	vgg19	Densenet	NO_DR	0.519916
	vgg19	Efficientnetb0	NO_DR	0.598353
	vgg19	Googlenet	NO_DR	0.440346
	vgg19	inceptionresnetv2	NO_DR	-0.0440033
	vgg19	inceptionv3	NO_DR	0.343794
	vgg19	mobilenetv2	NO_DR	0.404323
	vgg19	resnet18	NO_DR	0.374949
	vgg19	resnet50	NO_DR	-0.0384632
	vgg19	shufflenet	NO_DR	0.521221
	vgg19	vgg16	NO_DR	-0.0135324
	vgg19	vgg19	NO_DR	0.98892
	vgg19	xception	NO_DR	0.442937
	xception	Alexnet	NO_DR	0.414827
	xception	Densenet	NO_DR	0.500611
	xception	Efficientnetb0	NO_DR	0.395555
	xception	Googlenet	NO_DR	0.529811
	xception	inceptionresnetv2	NO_DR	-0.0441579
	xception	inceptionv3	NO_DR	0.463495
	xception	mobilenetv2	NO_DR	0.340678
	xception	resnet18	NO_DR	0.553393
	xception	renet50	NO_DR	-0.0386177
	xception	shufflenet	NO_DR	0.485759
	xception	vgg16	NO_DR	-0.0303075
	xception	vgg19	NO_DR	0.442937
	xception	xception	NO_DR	0.969529
			Trustability CNN verso NO_DR			0.329953
						0.329953	0	0

## Sheet: NODR_1_alexnet_alexnet
		Activation Maps Consensus		Network 1	Network 2
Immagine	Immagine	Gradcam-Consensus	True_Label	Alexnet_Scratch	Densenet_Scratch	Predict_Consensus	Penalty	Trustability
cfb17a7cc8d4		1	No_DR	No_DR	No_DR	1	0	1
cfdbaef73a8b		1	No_DR	No_DR	No_DR	1	0	1
cfed7c1172ec		1	No_DR	No_DR	No_DR	1	0	1
cff262ed8f4c		1	No_DR	No_DR	No_DR	1	0	1
cffc50047828		1	No_DR	No_DR	No_DR	1	0	1
d02b79fc3200		1	No_DR	No_DR	No_DR	1	0	1
d0926ed2c8e5		1	No_DR	No_DR	No_DR	1	0	1
d160ebef4117		1	No_DR	No_DR	No_DR	1	0	1
d16e39b9d6f0		1	No_DR	No_DR	No_DR	1	0	1
d16e59a2b33a		1	No_DR	No_DR	No_DR	1	0	1								,
d18f6431ebce		1	No_DR	No_DR	No_DR	1	0	1
d1a60c3b9fe5		1	No_DR	No_DR	No_DR	1	0	1
d1afdb8cf70d		1	No_DR	No_DR	No_DR	1	0	1
d1b279cc02ae		1	No_DR	No_DR	No_DR	1	0	1
d1ca85af57c9		1	No_DR	No_DR	No_DR	1	0	1
d1cf31577a59		1	No_DR	No_DR	No_DR	1	0	1
d1f7ea924a01		1	No_DR	No_DR	No_DR	1	0	1
d1fa0f744620		1	No_DR	No_DR	No_DR	1	0	1
d26bb2ed6e71		1	No_DR	No_DR	No_DR	1	0	1
d26bc6e1230d		1	No_DR	No_DR	No_DR	1	0	1
d27ac9e54901		1	No_DR	No_DR	No_DR	1	0	1
d29b37d110f3		1	No_DR	No_DR	No_DR	1	0	1
d2afca74cbc3		1	No_DR	No_DR	No_DR	1	0	1
d2c5fb82fe5f		1	No_DR	No_DR	No_DR	1	0	1
d2cd47ed2c1d		1	No_DR	No_DR	No_DR	1	0	1
d2d523e9f669		1	No_DR	No_DR	No_DR	1	0	1
d2dc86021c67		1	No_DR	No_DR	No_DR	1	0	1
d2fb715b0c41		1	No_DR	No_DR	No_DR	1	0	1
d30d079e6f9a		1	No_DR	No_DR	No_DR	1	0	1
d332d7b8a26e		1	No_DR	No_DR	No_DR	1	0	1
d38cf0f4a9af		1	No_DR	No_DR	No_DR	1	0	1
d39752cb6e57		1	No_DR	No_DR	No_DR	1	0	1
d3dfd0a2dee6		1	No_DR	No_DR	No_DR	1	0	1
d3e56584a481		1	No_DR	No_DR	No_DR	1	0	1
d436c06f0490		1	No_DR	No_DR	No_DR	1	0	1
d4583e9525dc		1	No_DR	No_DR	No_DR	1	0	1
d4bc001f7224		1	No_DR	No_DR	No_DR	1	0	1
d516f77d4516		1	No_DR	No_DR	No_DR	1	0	1
d51c2153d151		1	No_DR	No_DR	No_DR	1	0	1
d51e5d7484ea		1	No_DR	No_DR	No_DR	1	0	1
d56d32a1d62d		1	No_DR	No_DR	No_DR	1	0	1
d57d1be1bbd1		1	No_DR	No_DR	No_DR	1	0	1
d5ad3362424c		1	No_DR	No_DR	No_DR	1	0	1
d5c63a8d9e94		1	No_DR	No_DR	No_DR	1	0	1
d6130f2ec903		1	No_DR	No_DR	No_DR	1	0	1
d667af5742f6		1	No_DR	No_DR	No_DR	1	0	1
d6803e467592		1	No_DR	No_DR	No_DR	1	0	1
d69698f838db		1	No_DR	No_DR	No_DR	1	0	1
d6b109c82067		1	No_DR	No_DR	No_DR	1	0	1
d6dbb0820ea5		1	No_DR	No_DR	No_DR	1	0	1
d6df4fe492ec		1	No_DR	No_DR	No_DR	1	0	1
d6f36ec5564a		1	No_DR	No_DR	No_DR	1	0	1
d6f6bdfd8011		1	No_DR	No_DR	No_DR	1	0	1
d7078e8b0349		1	No_DR	No_DR	No_DR	1	0	1
d74ccc796517		1	No_DR	No_DR	No_DR	1	0	1
d774692d9919		1	No_DR	No_DR	No_DR	1	0	1
d78b7401096f		1	No_DR	No_DR	No_DR	1	0	1
d7a01fca9838		1	No_DR	No_DR	No_DR	1	0	1
d7ab5c040294		1	No_DR	No_DR	No_DR	1	0	1
d7ac4a0c9760		1	No_DR	No_DR	No_DR	1	0	1
d7bc00091cfc		1	No_DR	No_DR	No_DR	1	0	1
d7bc62d60e8c		1	No_DR	No_DR	No_DR	1	0	1
d7e5fe5245e0		1	No_DR	No_DR	No_DR	1	0	1
d807c53c1399		1	No_DR	No_DR	No_DR	1	0	1
d838d5b9f571		1	No_DR	No_DR	No_DR	1	0	1
d844a7252f4e		1	No_DR	No_DR	No_DR	1	0	1
d865997a6280		1	No_DR	No_DR	No_DR	1	0	1
d866c26d76f0		1	No_DR	No_DR	No_DR	1	0	1
d871895742b1		1	No_DR	No_DR	No_DR	1	0	1
d881c04f01fe		1	No_DR	No_DR	No_DR	1	0	1
d88c4843aec3		1	No_DR	No_DR	No_DR	1	0	1
d8da9de62743		1	No_DR	No_DR	No_DR	1	0	1
d911dd40c63b		1	No_DR	No_DR	No_DR	1	0	1
d91635f380b4		1	No_DR	No_DR	No_DR	1	0	1
d93b61dc8f64		1	No_DR	Moderate	Moderate	1	1	0
d97911a32918		1	No_DR	No_DR	No_DR	1	0	1
d99b0f7dd9b9		1	No_DR	No_DR	No_DR	1	0	1
d99dd99be001		1	No_DR	No_DR	No_DR	1	0	1
d9ad2a0ec026		1	No_DR	No_DR	No_DR	1	0	1
d9c9b9786da3		1	No_DR	No_DR	No_DR	1	0	1
d9d2631f043c		1	No_DR	No_DR	No_DR	1	0	1
d9e58e4d8689		1	No_DR	Moderate	Moderate	1	1	0
da0a83f074f3		1	No_DR	No_DR	No_DR	1	0	1
da2bdf4236ac		1	No_DR	No_DR	No_DR	1	0	1
da3a2275c850		1	No_DR	No_DR	No_DR	1	0	1
da6389d129aa		1	No_DR	Moderate	Moderate	1	1	0
da6bbb76d562		1	No_DR	No_DR	No_DR	1	0	1
da9262d9f5d9		1	No_DR	No_DR	No_DR	1	0	1
da949aa67a4f		1	No_DR	No_DR	No_DR	1	0	1
da9574d35b82		1	No_DR	No_DR	No_DR	1	0	1
da9fe02dead3		1	No_DR	No_DR	No_DR	1	0	1
daad7b617f21		1	No_DR	No_DR	No_DR	1	0	1
daff5427c9b2		1	No_DR	No_DR	No_DR	1	0	1
db3cd58aa315		1	No_DR	No_DR	No_DR	1	0	1
db52626d450c		1	No_DR	No_DR	No_DR	1	0	1
db6207e62c7b		1	No_DR	No_DR	No_DR	1	0	1
dc0eea0b68a7		1	No_DR	No_DR	No_DR	1	0	1
dc0f6e5b489b		1	No_DR	No_DR	No_DR	1	0	1
dcc6c0ad5cad		1	No_DR	No_DR	No_DR	1	0	1
dccdf750c962		1	No_DR	No_DR	No_DR	1	0	1
dce73d90c00c		1	No_DR	No_DR	No_DR	1	0	1
dcf109df1a2b		1	No_DR	No_DR	No_DR	1	0	1
dd02d60bef14		1	No_DR	No_DR	No_DR	1	0	1
dd285d9e97fe		1	No_DR	No_DR	No_DR	1	0	1
dd3176bacfe2		1	No_DR	No_DR	No_DR	1	0	1
dd90c321d7bc		1	No_DR	No_DR	No_DR	1	0	1
ddb222ff7c1d		1	No_DR	No_DR	No_DR	1	0	1
de18071c36e6		1	No_DR	No_DR	No_DR	1	0	1
de2eb5c8aa83		1	No_DR	No_DR	No_DR	1	0	1
de38adaae009		1	No_DR	No_DR	No_DR	1	0	1
de4cdabbce6d		1	No_DR	No_DR	No_DR	1	0	1
de55ed25e0e8		1	No_DR	No_DR	No_DR	1	0	1
de57c9e9fa93		1	No_DR	No_DR	No_DR	1	0	1
de6210f88536		1	No_DR	No_DR	No_DR	1	0	1
de730033c683		1	No_DR	No_DR	No_DR	1	0	1
dea7538bb91a		1	No_DR	No_DR	No_DR	1	0	1
dec5595e6154		1	No_DR	No_DR	No_DR	1	0	1
dee1031a76ae		1	No_DR	No_DR	No_DR	1	0	1
dee31065f8fe		1	No_DR	No_DR	No_DR	1	0	1
df0886f1e76b		1	No_DR	No_DR	No_DR	1	0	1
df6d13d04da1		1	No_DR	No_DR	No_DR	1	0	1
df9cb3729eb1		1	No_DR	No_DR	No_DR	1	0	1
dfc7ec7db0e0		1	No_DR	No_DR	No_DR	1	0	1
dfea19863428		1	No_DR	No_DR	No_DR	1	0	1
e01b7bac822b		1	No_DR	No_DR	No_DR	1	0	1
e0313be77035		1	No_DR	No_DR	No_DR	1	0	1
e03a74e7d74f		1	No_DR	No_DR	No_DR	1	0	1
e04f3c6619a3		1	No_DR	No_DR	No_DR	1	0	1
e067b06fd655		1	No_DR	No_DR	No_DR	1	0	1
e06cccc08c59		1	No_DR	No_DR	No_DR	1	0	1
e087bd4b88f2		1	No_DR	No_DR	No_DR	1	0	1
e0d229db881a		1	No_DR	No_DR	No_DR	1	0	1
e12df54e0d1e		1	No_DR	No_DR	No_DR	1	0	1
e12f9f19d1be		1	No_DR	No_DR	No_DR	1	0	1
e135d7ba9a0e		1	No_DR	No_DR	No_DR	1	0	1
e160a3b19911		1	No_DR	No_DR	No_DR	1	0	1
e16af45285e5		1	No_DR	No_DR	No_DR	1	0	1
e1ab92228e60		1	No_DR	Mild	Mild	1	1	0
e1b8acb1cea1		1	No_DR	No_DR	No_DR	1	0	1
e1c02f6c3362		1	No_DR	No_DR	No_DR	1	0	1
e1dc02a3dc2a		1	No_DR	No_DR	No_DR	1	0	1
e2265c383348		1	No_DR	No_DR	No_DR	1	0	1
e246cd89e1cc		1	No_DR	No_DR	No_DR	1	0	1
e251bdf05b85		1	No_DR	No_DR	No_DR	1	0	1
e26bcae6c67b		1	No_DR	No_DR	No_DR	1	0	1
e29e54ff921e		1	No_DR	No_DR	No_DR	1	0	1
e2c39ed0c941		1	No_DR	No_DR	No_DR	1	0	1
e2c3b037413b		1	No_DR	Mild	Mild	1	1	0
e2ec22b3d07e		1	No_DR	No_DR	No_DR	1	0	1
e30a890600e1		1	No_DR	No_DR	No_DR	1	0	1
e322acd46152		1	No_DR	No_DR	No_DR	1	0	1
e33766353db2		1	No_DR	No_DR	No_DR	1	0	1
e3b47ed5b511		1	No_DR	No_DR	No_DR	1	0	1
e3cd96cb094c		1	No_DR	No_DR	No_DR	1	0	1
e42d9a94a66d		1	No_DR	No_DR	No_DR	1	0	1
e47452069ea1		1	No_DR	No_DR	No_DR	1	0	1
e47770a2e5d1		1	No_DR	No_DR	No_DR	1	0	1
e4a44f9158dc		1	No_DR	No_DR	No_DR	1	0	1
e4ae1ee6aada		1	No_DR	No_DR	No_DR	1	0	1
e4b0df29b96f		1	No_DR	No_DR	No_DR	1	0	1
e4c799738a19		1	No_DR	No_DR	No_DR	1	0	1
e4d3d437b0a8		1	No_DR	No_DR	No_DR	1	0	1
e4dcca36ceb4		1	No_DR	No_DR	No_DR	1	0	1
e50b0174690d		1	No_DR	No_DR	No_DR	1	0	1
e5197d77ec68		1	No_DR	No_DR	No_DR	1	0	1
e529c5757d64		1	No_DR	No_DR	No_DR	1	0	1
e582e56e7942		1	No_DR	No_DR	No_DR	1	0	1
e594c19e2e1d		1	No_DR	No_DR	No_DR	1	0	1
e59c5f345bb0		1	No_DR	No_DR	No_DR	1	0	1
e5de79795c1d		1	No_DR	No_DR	No_DR	1	0	1
e5f332efcbc7		1	No_DR	No_DR	No_DR	1	0	1
e5f73f2855c0		1	No_DR	No_DR	No_DR	1	0	1
e60e4edb3ca9		1	No_DR	No_DR	No_DR	1	0	1
e632e38fd2d4		1	No_DR	No_DR	No_DR	1	0	1
e6552b7432b3		1	No_DR	No_DR	No_DR	1	0	1
e66855a5c583		1	No_DR	No_DR	No_DR	1	0	1
e66ad813a508		1	No_DR	No_DR	No_DR	1	0	1
e68746d426b2		1	No_DR	No_DR	No_DR	1	0	1
e68bdd36e589		1	No_DR	No_DR	No_DR	1	0	1
e69b48516577		1	No_DR	No_DR	No_DR	1	0	1
e6a5e4718873		1	No_DR	No_DR	No_DR	1	0	1
e7291472109b		1	No_DR	No_DR	No_DR	1	0	1
e7578d8dba72		1	No_DR	No_DR	No_DR	1	0	1
e77a93c3d9a9		1	No_DR	No_DR	No_DR	1	0	1
e79e10907295		1	No_DR	No_DR	No_DR	1	0	1
e7b5dd5bab1f		1	No_DR	No_DR	No_DR	1	0	1
e81f4a2fbbdc		1	No_DR	No_DR	No_DR	1	0	1
e82232a3c28b		1	No_DR	No_DR	No_DR	1	0	1
e893e86dde94		1	No_DR	No_DR	No_DR	1	0	1
e8ddfc9709ce		1	No_DR	No_DR	No_DR	1	0	1
e8e44b3160e3		1	No_DR	No_DR	No_DR	1	0	1
e907d23cce3d		1	No_DR	No_DR	No_DR	1	0	1
e933923aab15		1	No_DR	No_DR	No_DR	1	0	1
e966850247f4		1	No_DR	No_DR	No_DR	1	0	1
e9678824215d		1	No_DR	No_DR	No_DR	1	0	1
e97ecf4355cb		1	No_DR	No_DR	No_DR	1	0	1
e9ce5bf645ab		1	No_DR	No_DR	No_DR	1	0	1
e9f3c85a2a02		1	No_DR	No_DR	No_DR	1	0	1
e9faf0296643		1	No_DR	No_DR	No_DR	1	0	1
ea4ce9516144		1	No_DR	No_DR	No_DR	1	0	1
ea5c42a78979		1	No_DR	No_DR	No_DR	1	0	1
ea68b58a6e8f		1	No_DR	No_DR	No_DR	1	0	1
ea6a53e54d0f		1	No_DR	No_DR	No_DR	1	0	1
ea7e21bab610		1	No_DR	No_DR	No_DR	1	0	1
ea9c41e1ced0		1	No_DR	No_DR	No_DR	1	0	1
eabc7c716255		1	No_DR	No_DR	No_DR	1	0	1
eabf421f94d0		1	No_DR	No_DR	No_DR	1	0	1
eae70f527755		1	No_DR	No_DR	No_DR	1	0	1
eb050765b323		1	No_DR	No_DR	No_DR	1	0	1
eb175669d789		1	No_DR	No_DR	No_DR	1	0	1
eb6b1f1c09db		1	No_DR	Moderate	Moderate	1	1	0
ebd96d853918		1	No_DR	No_DR	No_DR	1	0	1
ebf4b22240f4		1	No_DR	No_DR	No_DR	1	0	1
ec01f0862669		1	No_DR	No_DR	No_DR	1	0	1
ec0c9f817b03		1	No_DR	No_DR	No_DR	1	0	1
ec363f48867b		1	No_DR	No_DR	No_DR	1	0	1
ec57cc20d776		1	No_DR	No_DR	No_DR	1	0	1
ec6659926105		1	No_DR	No_DR	No_DR	1	0	1
ec6f1797a25a		1	No_DR	No_DR	No_DR	1	0	1
ecad6845f630		1	No_DR	No_DR	No_DR	1	0	1
ecb4500285ed		1	No_DR	No_DR	No_DR	1	0	1
ed2c52c14493		1	No_DR	No_DR	No_DR	1	0	1
ed2ef440d22c		1	No_DR	No_DR	No_DR	1	0	1
ed3ce1674761		1	No_DR	No_DR	No_DR	1	0	1
ed648b9bcd95		1	No_DR	No_DR	No_DR	1	0	1
ed6bd9293a89		1	No_DR	No_DR	No_DR	1	0	1
eda1d75cbcf0		1	No_DR	No_DR	No_DR	1	0	1
eda29a9d78f3		1	No_DR	No_DR	No_DR	1	0	1
edceb0657d77		1	No_DR	No_DR	No_DR	1	0	1
ee36ca728641		1	No_DR	No_DR	No_DR	1	0	1
ee3f5cf52188		1	No_DR	No_DR	No_DR	1	0	1
ee3fe7809e6a		1	No_DR	No_DR	No_DR	1	0	1
ee77763a6afb		1	No_DR	No_DR	No_DR	1	0	1
eeaea2c5ff34		1	No_DR	No_DR	No_DR	1	0	1
eebd1e195952		1	No_DR	No_DR	No_DR	1	0	1
eedae6b28f96		1	No_DR	No_DR	No_DR	1	0	1
ef247f28004f		1	No_DR	No_DR	No_DR	1	0	1
ef4121e9bb67		1	No_DR	No_DR	No_DR	1	0	1
ef476be214d4		1	No_DR	No_DR	No_DR	1	0	1
ef48780f5d5f		1	No_DR	No_DR	No_DR	1	0	1
ef5155990874		1	No_DR	No_DR	No_DR	1	0	1
ef7eb85b75fc		1	No_DR	No_DR	No_DR	1	0	1
ef81cd8854cb		1	No_DR	No_DR	No_DR	1	0	1
ef8c39eb9157		1	No_DR	No_DR	No_DR	1	0	1
ef99c499d665		1	No_DR	No_DR	No_DR	1	0	1
f002ce614c59		1	No_DR	No_DR	No_DR	1	0	1
f00ce9b9d6f4		1	No_DR	No_DR	No_DR	1	0	1
f02057c41256		1	No_DR	No_DR	No_DR	1	0	1
f0267c42907c		1	No_DR	No_DR	No_DR	1	0	1
f02956bd7c50		1	No_DR	No_DR	No_DR	1	0	1
f02babb3a023		1	No_DR	No_DR	No_DR	1	0	1
f0546a45ef10		1	No_DR	No_DR	No_DR	1	0	1
f066db7a2efe		1	No_DR	Mild	Mild	1	1	0
f06e7a9df795		1	No_DR	No_DR	No_DR	1	0	1
f0860c21533b		1	No_DR	No_DR	No_DR	1	0	1
f09cfc6a4dbd		1	No_DR	No_DR	No_DR	1	0	1
f09fd9433dff		1	No_DR	No_DR	No_DR	1	0	1
f0a2dc580009		1	No_DR	No_DR	No_DR	1	0	1
f0e1201b5c1f		1	No_DR	No_DR	No_DR	1	0	1
f1979147aad4		1	No_DR	No_DR	No_DR	1	0	1
f1d719c97838		1	No_DR	No_DR	No_DR	1	0	1
f233638e0e90		1	No_DR	No_DR	No_DR	1	0	1
f252046c0fe6		1	No_DR	No_DR	No_DR	1	0	1
f26b02ead915		1	No_DR	No_DR	No_DR	1	0	1
f298b7d05958		1	No_DR	No_DR	No_DR	1	0	1
f2c0b41acd05		1	No_DR	No_DR	No_DR	1	0	1
f2f569a64949		1	No_DR	No_DR	No_DR	1	0	1
f35d80bb1a22		1	No_DR	No_DR	No_DR	1	0	1
f361060eda3e		1	No_DR	No_DR	No_DR	1	0	1
f366fb1cc475		1	No_DR	No_DR	No_DR	1	0	1
f36cb007a1ef		1	No_DR	No_DR	No_DR	1	0	1
f3a4751af42e		1	No_DR	No_DR	No_DR	1	0	1
f3b27ac2d371		1	No_DR	No_DR	No_DR	1	0	1
f3bb996b45ce		1	No_DR	No_DR	No_DR	1	0	1
f42b693a9414		1	No_DR	No_DR	No_DR	1	0	1
f431f2e119d7		1	No_DR	No_DR	No_DR	1	0	1
f451eee2b66b		1	No_DR	No_DR	No_DR	1	0	1
f48241b0c995		1	No_DR	No_DR	No_DR	1	0	1
f4874247ede6		1	No_DR	No_DR	No_DR	1	0	1
f4c7ae514c54		1	No_DR	No_DR	No_DR	1	0	1
f4d3169b468a		1	No_DR	No_DR	No_DR	1	0	1
f4de9620e3f2		1	No_DR	No_DR	No_DR	1	0	1
f4df3d86688d		1	No_DR	No_DR	No_DR	1	0	1
f4e68b61f480		1	No_DR	No_DR	No_DR	1	0	1
f4ea2a2cfbb9		1	No_DR	No_DR	No_DR	1	0	1
f531232ecb55		1	No_DR	No_DR	No_DR	1	0	1
f56ff0440ed1		1	No_DR	No_DR	No_DR	1	0	1
f5733f77273d		1	No_DR	No_DR	No_DR	1	0	1
f57cf3b6f48e		1	No_DR	No_DR	No_DR	1	0	1
f580566e27f5		1	No_DR	No_DR	No_DR	1	0	1
f58cdfa968be		1	No_DR	No_DR	No_DR	1	0	1
f58f0b2fd718		1	No_DR	No_DR	No_DR	1	0	1
f5c953bee7cd		1	No_DR	No_DR	No_DR	1	0	1
f62b8a076833		1	No_DR	No_DR	No_DR	1	0	1
f633c474e8b8		1	No_DR	No_DR	No_DR	1	0	1
f64b6e85f1c9		1	No_DR	No_DR	No_DR	1	0	1
f66c4ee86629		1	No_DR	No_DR	No_DR	1	0	1
f68690db78d3		1	No_DR	No_DR	No_DR	1	0	1
f6d760566a51		1	No_DR	No_DR	No_DR	1	0	1
f7116e7b2f4e		1	No_DR	No_DR	No_DR	1	0	1
f71333204618		1	No_DR	No_DR	No_DR	1	0	1
f71aca5a7dc3		1	No_DR	No_DR	No_DR	1	0	1
f71bea807c96		1	No_DR	No_DR	No_DR	1	0	1
f7508f14dd7b		1	No_DR	No_DR	No_DR	1	0	1
f7735b6d47f7		1	No_DR	No_DR	No_DR	1	0	1
f7defe70afc3		1	No_DR	No_DR	No_DR	1	0	1
f7e9fa75c7c1		1	No_DR	No_DR	No_DR	1	0	1
f819c65b803c		1	No_DR	No_DR	No_DR	1	0	1
f85c78201a50		1	No_DR	No_DR	No_DR	1	0	1
f85fd4fac887		1	No_DR	No_DR	No_DR	1	0	1
f86d1c404acb		1	No_DR	No_DR	No_DR	1	0	1
f8d62557ad0c		1	No_DR	No_DR	No_DR	1	0	1
f8f5942b690e		1	No_DR	No_DR	No_DR	1	0	1
f90f8931a9bc		1	No_DR	No_DR	No_DR	1	0	1
f91cfa82b9d4		1	No_DR	No_DR	No_DR	1	0	1
f952ad2e4356		1	No_DR	No_DR	No_DR	1	0	1
f994a3b07935		1	No_DR	No_DR	No_DR	1	0	1
f9d52509c571		1	No_DR	No_DR	No_DR	1	0	1
f9d8ff3e6592		1	No_DR	No_DR	No_DR	1	0	1
f9e1c439d4c8		1	No_DR	No_DR	No_DR	1	0	1
fa0c87bd75ce		1	No_DR	No_DR	No_DR	1	0	1
fa573163dd8b		1	No_DR	No_DR	No_DR	1	0	1
fa6f3d8bb1d5		1	No_DR	No_DR	No_DR	1	0	1
fa7fa797c650		1	No_DR	No_DR	No_DR	1	0	1
fa9bece586fc		1	No_DR	No_DR	No_DR	1	0	1
fa9f1bc03f21		1	No_DR	No_DR	No_DR	1	0	1
fb1b8771c70a		1	No_DR	No_DR	No_DR	1	0	1
fb767cea406c		1	No_DR	No_DR	No_DR	1	0	1
fb88783de055		1	No_DR	No_DR	No_DR	1	0	1
fb88d23fc5fe		1	No_DR	No_DR	No_DR	1	0	1
fbcbc81cf9be		1	No_DR	No_DR	No_DR	1	0	1
fbdc796290d4		1	No_DR	No_DR	No_DR	1	0	1
fbfa925506f6		1	No_DR	No_DR	No_DR	1	0	1
fc782722a50c		1	No_DR	No_DR	No_DR	1	0	1
fc898dfeb24f		1	No_DR	No_DR	No_DR	1	0	1
fc8fce67fbf8		1	No_DR	No_DR	No_DR	1	0	1
fca1a8738b8a		1	No_DR	No_DR	No_DR	1	0	1
fcc32dffd24d		1	No_DR	No_DR	No_DR	1	0	1
fce73678f650		1	No_DR	No_DR	No_DR	1	0	1
fd079d2e93a2		1	No_DR	No_DR	No_DR	1	0	1
fd0a70082e7c		1	No_DR	No_DR	No_DR	1	0	1
fd4c946c52bf		1	No_DR	No_DR	No_DR	1	0	1
fd87b6b2e664		1	No_DR	No_DR	No_DR	1	0	1
fdbc252813b1		1	No_DR	No_DR	No_DR	1	0	1
fdc685055659		1	No_DR	No_DR	No_DR	1	0	1
fe06dad6851c		1	No_DR	No_DR	No_DR	1	0	1
fe0e2dee1834		1	No_DR	No_DR	No_DR	1	0	1
fe3b0e50be78		1	No_DR	No_DR	No_DR	1	0	1
fe3f62695b2d		1	No_DR	No_DR	No_DR	1	0	1
febfb20dc311		1	No_DR	No_DR	No_DR	1	0	1
fed5bb685832		1	No_DR	No_DR	No_DR	1	0	1
fefded6bf135		1	No_DR	No_DR	No_DR	1	0	1
ff03f74667df		1	No_DR	No_DR	No_DR	1	0	1
ff1e940105f9		1	No_DR	No_DR	No_DR	1	0	1
ff4832d55461		1	No_DR	No_DR	No_DR	1	0	1
ff4955e76894		1	No_DR	Mild	Mild	1	1	0
ff4cd992667b		1	No_DR	No_DR	No_DR	1	0	1
ff59d44a70a7		1	No_DR	No_DR	No_DR	1	0	1
ff631653374e		1	No_DR	No_DR	No_DR	1	0	1
ffc04fed30e6		1	No_DR	No_DR	No_DR	1	0	1
ffd97f8cd5aa		1	No_DR	No_DR	No_DR	1	0	1
						361	8	353

## Sheet: NODR_1_alexnet_densenet
		Activation Maps Consensus		Network 1	Network 2
Immagine	Immagine	Gradcam-Consensus	True_Label	Alexnet_Scratch	Densenet_Scratch	Predict_Consensus	Penalty	Trustability
cfb17a7cc8d4		0.784118	No_DR	No_DR	No_DR	1	0	0.784118
cfdbaef73a8b		0.152155	No_DR	No_DR	No_DR	1	0	0.152155
cfed7c1172ec		0.780098	No_DR	No_DR	No_DR	1	0	0.780098
cff262ed8f4c		0.566772	No_DR	No_DR	No_DR	1	0	0.566772
cffc50047828		0.638828	No_DR	No_DR	No_DR	1	0	0.638828
d02b79fc3200		0.714474	No_DR	No_DR	No_DR	1	0	0.714474
d0926ed2c8e5		0.732885	No_DR	No_DR	No_DR	1	0	0.732885
d160ebef4117		0.456342	No_DR	No_DR	No_DR	1	0	0.456342
d16e39b9d6f0		0.617828	No_DR	No_DR	No_DR	1	0	0.617828
d16e59a2b33a		0.710438	No_DR	No_DR	No_DR	1	0	0.710438
d18f6431ebce		0.688688	No_DR	No_DR	No_DR	1	0	0.688688
d1a60c3b9fe5		0.67957	No_DR	No_DR	No_DR	1	0	0.67957
d1afdb8cf70d		0.691225	No_DR	No_DR	No_DR	1	0	0.691225
d1b279cc02ae		0.648025	No_DR	No_DR	No_DR	1	0	0.648025
d1ca85af57c9		0.737469	No_DR	No_DR	No_DR	1	0	0.737469
d1cf31577a59		0.281741	No_DR	No_DR	No_DR	1	0	0.281741
d1f7ea924a01		0.577069	No_DR	No_DR	No_DR	1	0	0.577069
d1fa0f744620		0.671914	No_DR	No_DR	No_DR	1	0	0.671914
d26bb2ed6e71		0.668099	No_DR	No_DR	No_DR	1	0	0.668099
d26bc6e1230d		0.67924	No_DR	No_DR	No_DR	1	0	0.67924
d27ac9e54901		0.68729	No_DR	No_DR	No_DR	1	0	0.68729
d29b37d110f3		0.715004	No_DR	No_DR	No_DR	1	0	0.715004
d2afca74cbc3		0.595157	No_DR	No_DR	No_DR	1	0	0.595157
d2c5fb82fe5f		0.669324	No_DR	No_DR	No_DR	1	0	0.669324
d2cd47ed2c1d		0.712641	No_DR	No_DR	No_DR	1	0	0.712641
d2d523e9f669		0.689202	No_DR	No_DR	No_DR	1	0	0.689202
d2dc86021c67		0.735646	No_DR	No_DR	No_DR	1	0	0.735646
d2fb715b0c41		0.676979	No_DR	No_DR	No_DR	1	0	0.676979
d30d079e6f9a		0.77537	No_DR	No_DR	No_DR	1	0	0.77537
d332d7b8a26e		0.777758	No_DR	No_DR	No_DR	1	0	0.777758
d38cf0f4a9af		0.803101	No_DR	No_DR	No_DR	1	0	0.803101
d39752cb6e57		0.681584	No_DR	No_DR	No_DR	1	0	0.681584
d3dfd0a2dee6		0.608611	No_DR	No_DR	No_DR	1	0	0.608611
d3e56584a481		0.644065	No_DR	No_DR	No_DR	1	0	0.644065
d436c06f0490		0.770924	No_DR	No_DR	No_DR	1	0	0.770924
d4583e9525dc		0.355141	No_DR	No_DR	No_DR	1	0	0.355141
d4bc001f7224		0.362787	No_DR	No_DR	No_DR	1	0	0.362787
d516f77d4516		0.73119	No_DR	No_DR	No_DR	1	0	0.73119
d51c2153d151		0.488074	No_DR	No_DR	Moderate	0	1	-0.511926
d51e5d7484ea		0.728065	No_DR	No_DR	No_DR	1	0	0.728065
d56d32a1d62d		0.694564	No_DR	No_DR	No_DR	1	0	0.694564
d57d1be1bbd1		0.112522	No_DR	No_DR	No_DR	1	0	0.112522
d5ad3362424c		0.333477	No_DR	No_DR	No_DR	1	0	0.333477
d5c63a8d9e94		0.776129	No_DR	No_DR	No_DR	1	0	0.776129
d6130f2ec903		0.383816	No_DR	No_DR	No_DR	1	0	0.383816
d667af5742f6		0.638611	No_DR	No_DR	No_DR	1	0	0.638611
d6803e467592		0.633882	No_DR	No_DR	No_DR	1	0	0.633882
d69698f838db		0.730722	No_DR	No_DR	No_DR	1	0	0.730722
d6b109c82067		0.780245	No_DR	No_DR	No_DR	1	0	0.780245
d6dbb0820ea5		0.718216	No_DR	No_DR	No_DR	1	0	0.718216
d6df4fe492ec		0.66644	No_DR	No_DR	No_DR	1	0	0.66644
d6f36ec5564a		0.597479	No_DR	No_DR	No_DR	1	0	0.597479
d6f6bdfd8011		0.75215	No_DR	No_DR	No_DR	1	0	0.75215
d7078e8b0349		0.640156	No_DR	No_DR	No_DR	1	0	0.640156
d74ccc796517		0.818245	No_DR	No_DR	No_DR	1	0	0.818245
d774692d9919		0.713192	No_DR	No_DR	No_DR	1	0	0.713192
d78b7401096f		0.167359	No_DR	No_DR	No_DR	1	0	0.167359
d7a01fca9838		0.716031	No_DR	No_DR	No_DR	1	0	0.716031
d7ab5c040294		0.60042	No_DR	No_DR	No_DR	1	0	0.60042
d7ac4a0c9760		0.751254	No_DR	No_DR	No_DR	1	0	0.751254
d7bc00091cfc		0.676105	No_DR	No_DR	No_DR	1	0	0.676105
d7bc62d60e8c		0.303779	No_DR	No_DR	No_DR	1	0	0.303779
d7e5fe5245e0		0.7244	No_DR	No_DR	Mild	0	1	-0.2756
d807c53c1399		0.599885	No_DR	No_DR	No_DR	1	0	0.599885
d838d5b9f571		0.716095	No_DR	No_DR	No_DR	1	0	0.716095
d844a7252f4e		0.474618	No_DR	No_DR	Moderate	0	1	-0.525382
d865997a6280		0.645851	No_DR	No_DR	No_DR	1	0	0.645851
d866c26d76f0		0.566098	No_DR	No_DR	No_DR	1	0	0.566098
d871895742b1		0.362305	No_DR	No_DR	No_DR	1	0	0.362305
d881c04f01fe		0.710412	No_DR	No_DR	No_DR	1	0	0.710412
d88c4843aec3		0.761891	No_DR	No_DR	No_DR	1	0	0.761891
d8da9de62743		0.725695	No_DR	No_DR	No_DR	1	0	0.725695
d911dd40c63b		0.690126	No_DR	No_DR	No_DR	1	0	0.690126
d91635f380b4		0.558629	No_DR	No_DR	No_DR	1	0	0.558629
d93b61dc8f64		0.190936	No_DR	Moderate	No_DR	0	1	-0.809064
d97911a32918		0.726306	No_DR	No_DR	No_DR	1	0	0.726306
d99b0f7dd9b9		0.737907	No_DR	No_DR	No_DR	1	0	0.737907
d99dd99be001		0.636098	No_DR	No_DR	No_DR	1	0	0.636098
d9ad2a0ec026		0.71576	No_DR	No_DR	No_DR	1	0	0.71576
d9c9b9786da3		0.560486	No_DR	No_DR	No_DR	1	0	0.560486
d9d2631f043c		0.150794	No_DR	No_DR	No_DR	1	0	0.150794
d9e58e4d8689		0.520751	No_DR	Moderate	Moderate	1	1	-0.479249
da0a83f074f3		0.633762	No_DR	No_DR	No_DR	1	0	0.633762
da2bdf4236ac		0.675918	No_DR	No_DR	No_DR	1	0	0.675918
da3a2275c850		0.751635	No_DR	No_DR	No_DR	1	0	0.751635
da6389d129aa		0.54481	No_DR	Moderate	Moderate	1	1	-0.45519
da6bbb76d562		0.417429	No_DR	No_DR	No_DR	1	0	0.417429
da9262d9f5d9		0.730895	No_DR	No_DR	No_DR	1	0	0.730895
da949aa67a4f		0.743867	No_DR	No_DR	No_DR	1	0	0.743867
da9574d35b82		0.076676	No_DR	No_DR	No_DR	1	0	0.076676
da9fe02dead3		0.577583	No_DR	No_DR	No_DR	1	0	0.577583
daad7b617f21		0.25721	No_DR	No_DR	No_DR	1	0	0.25721
daff5427c9b2		0.643927	No_DR	No_DR	No_DR	1	0	0.643927
db3cd58aa315		0.598241	No_DR	No_DR	No_DR	1	0	0.598241
db52626d450c		0.682372	No_DR	No_DR	No_DR	1	0	0.682372
db6207e62c7b		0.6768	No_DR	No_DR	No_DR	1	0	0.6768
dc0eea0b68a7		0.2482	No_DR	No_DR	No_DR	1	0	0.2482
dc0f6e5b489b		0.713786	No_DR	No_DR	No_DR	1	0	0.713786
dcc6c0ad5cad		0.301606	No_DR	No_DR	No_DR	1	0	0.301606
dccdf750c962		0.588888	No_DR	No_DR	No_DR	1	0	0.588888
dce73d90c00c		0.765415	No_DR	No_DR	No_DR	1	0	0.765415
dcf109df1a2b		0.687644	No_DR	No_DR	No_DR	1	0	0.687644
dd02d60bef14		0.459591	No_DR	No_DR	No_DR	1	0	0.459591
dd285d9e97fe		0.748114	No_DR	No_DR	No_DR	1	0	0.748114
dd3176bacfe2		0.295956	No_DR	No_DR	No_DR	1	0	0.295956
dd90c321d7bc		0.640277	No_DR	No_DR	No_DR	1	0	0.640277
ddb222ff7c1d		0.542896	No_DR	No_DR	No_DR	1	0	0.542896
de18071c36e6		0.656788	No_DR	No_DR	No_DR	1	0	0.656788
de2eb5c8aa83		0.236585	No_DR	No_DR	No_DR	1	0	0.236585
de38adaae009		0.209592	No_DR	No_DR	No_DR	1	0	0.209592
de4cdabbce6d		0.663909	No_DR	No_DR	No_DR	1	0	0.663909
de55ed25e0e8		0.66775	No_DR	No_DR	No_DR	1	0	0.66775
de57c9e9fa93		0.464224	No_DR	No_DR	No_DR	1	0	0.464224
de6210f88536		0.722474	No_DR	No_DR	No_DR	1	0	0.722474
de730033c683		0.097437	No_DR	No_DR	No_DR	1	0	0.097437
dea7538bb91a		0.389581	No_DR	No_DR	No_DR	1	0	0.389581
dec5595e6154		0.670609	No_DR	No_DR	No_DR	1	0	0.670609
dee1031a76ae		0.238699	No_DR	No_DR	No_DR	1	0	0.238699
dee31065f8fe		0.770124	No_DR	No_DR	No_DR	1	0	0.770124
df0886f1e76b		0.60071	No_DR	No_DR	No_DR	1	0	0.60071
df6d13d04da1		0.763343	No_DR	No_DR	No_DR	1	0	0.763343
df9cb3729eb1		0.681527	No_DR	No_DR	No_DR	1	0	0.681527
dfc7ec7db0e0		0.746623	No_DR	No_DR	No_DR	1	0	0.746623
dfea19863428		0.270532	No_DR	No_DR	No_DR	1	0	0.270532
e01b7bac822b		0.693434	No_DR	No_DR	No_DR	1	0	0.693434
e0313be77035		0.659498	No_DR	No_DR	No_DR	1	0	0.659498
e03a74e7d74f		0.398115	No_DR	No_DR	No_DR	1	0	0.398115
e04f3c6619a3		0.718966	No_DR	No_DR	No_DR	1	0	0.718966
e067b06fd655		0.745514	No_DR	No_DR	No_DR	1	0	0.745514
e06cccc08c59		0.737849	No_DR	No_DR	No_DR	1	0	0.737849
e087bd4b88f2		0.695185	No_DR	No_DR	No_DR	1	0	0.695185
e0d229db881a		0.745221	No_DR	No_DR	No_DR	1	0	0.745221
e12df54e0d1e		0.757516	No_DR	No_DR	No_DR	1	0	0.757516
e12f9f19d1be		0.717843	No_DR	No_DR	No_DR	1	0	0.717843
e135d7ba9a0e		0.81043	No_DR	No_DR	No_DR	1	0	0.81043
e160a3b19911		0.646197	No_DR	No_DR	No_DR	1	0	0.646197
e16af45285e5		0.630091	No_DR	No_DR	No_DR	1	0	0.630091
e1ab92228e60		0.617714	No_DR	Mild	Mild	1	1	-0.382286
e1b8acb1cea1		0.705281	No_DR	No_DR	No_DR	1	0	0.705281
e1c02f6c3362		0.718991	No_DR	No_DR	No_DR	1	0	0.718991
e1dc02a3dc2a		0.752381	No_DR	No_DR	No_DR	1	0	0.752381
e2265c383348		0.619473	No_DR	No_DR	No_DR	1	0	0.619473
e246cd89e1cc		0.710458	No_DR	No_DR	No_DR	1	0	0.710458
e251bdf05b85		0.462941	No_DR	No_DR	No_DR	1	0	0.462941
e26bcae6c67b		0.360551	No_DR	No_DR	No_DR	1	0	0.360551
e29e54ff921e		0.722584	No_DR	No_DR	No_DR	1	0	0.722584
e2c39ed0c941		0.804376	No_DR	No_DR	No_DR	1	0	0.804376
e2c3b037413b		0.670782	No_DR	Mild	Mild	1	1	-0.329218
e2ec22b3d07e		0.370075	No_DR	No_DR	No_DR	1	0	0.370075
e30a890600e1		0.343452	No_DR	No_DR	No_DR	1	0	0.343452
e322acd46152		0.531256	No_DR	No_DR	No_DR	1	0	0.531256
e33766353db2		0.627994	No_DR	No_DR	No_DR	1	0	0.627994
e3b47ed5b511		0.777632	No_DR	No_DR	No_DR	1	0	0.777632
e3cd96cb094c		0.634401	No_DR	No_DR	No_DR	1	0	0.634401
e42d9a94a66d		0.456898	No_DR	No_DR	No_DR	1	0	0.456898
e47452069ea1		0.685193	No_DR	No_DR	No_DR	1	0	0.685193
e47770a2e5d1		0.362936	No_DR	No_DR	No_DR	1	0	0.362936
e4a44f9158dc		0.733334	No_DR	No_DR	No_DR	1	0	0.733334
e4ae1ee6aada		0.714572	No_DR	No_DR	No_DR	1	0	0.714572
e4b0df29b96f		0.678956	No_DR	No_DR	No_DR	1	0	0.678956
e4c799738a19		0.670856	No_DR	No_DR	No_DR	1	0	0.670856
e4d3d437b0a8		0.738247	No_DR	No_DR	No_DR	1	0	0.738247
e4dcca36ceb4		0.731054	No_DR	No_DR	No_DR	1	0	0.731054
e50b0174690d		0.780841	No_DR	No_DR	No_DR	1	0	0.780841
e5197d77ec68		0.373855	No_DR	No_DR	No_DR	1	0	0.373855
e529c5757d64		0.700204	No_DR	No_DR	No_DR	1	0	0.700204
e582e56e7942		0.791428	No_DR	No_DR	No_DR	1	0	0.791428
e594c19e2e1d		0.669121	No_DR	No_DR	No_DR	1	0	0.669121
e59c5f345bb0		0.533907	No_DR	No_DR	No_DR	1	0	0.533907
e5de79795c1d		0.456065	No_DR	No_DR	No_DR	1	0	0.456065
e5f332efcbc7		0.388613	No_DR	No_DR	No_DR	1	0	0.388613
e5f73f2855c0		0.723734	No_DR	No_DR	No_DR	1	0	0.723734
e60e4edb3ca9		0.656501	No_DR	No_DR	No_DR	1	0	0.656501
e632e38fd2d4		0.027873	No_DR	No_DR	No_DR	1	0	0.027873
e6552b7432b3		0.779577	No_DR	No_DR	No_DR	1	0	0.779577
e66855a5c583		0.668006	No_DR	No_DR	No_DR	1	0	0.668006
e66ad813a508		0.688244	No_DR	No_DR	No_DR	1	0	0.688244
e68746d426b2		0.313072	No_DR	No_DR	No_DR	1	0	0.313072
e68bdd36e589		0.277191	No_DR	No_DR	No_DR	1	0	0.277191
e69b48516577		0.186454	No_DR	No_DR	No_DR	1	0	0.186454
e6a5e4718873		0.762894	No_DR	No_DR	No_DR	1	0	0.762894
e7291472109b		0.464598	No_DR	No_DR	No_DR	1	0	0.464598
e7578d8dba72		0.566658	No_DR	No_DR	No_DR	1	0	0.566658
e77a93c3d9a9		0.343021	No_DR	No_DR	No_DR	1	0	0.343021
e79e10907295		0.647594	No_DR	No_DR	No_DR	1	0	0.647594
e7b5dd5bab1f		0.646852	No_DR	No_DR	No_DR	1	0	0.646852
e81f4a2fbbdc		0.488955	No_DR	No_DR	No_DR	1	0	0.488955
e82232a3c28b		0.749245	No_DR	No_DR	No_DR	1	0	0.749245
e893e86dde94		0.805036	No_DR	No_DR	No_DR	1	0	0.805036
e8ddfc9709ce		0.7945	No_DR	No_DR	No_DR	1	0	0.7945
e8e44b3160e3		0.674333	No_DR	No_DR	No_DR	1	0	0.674333
e907d23cce3d		0.637344	No_DR	No_DR	No_DR	1	0	0.637344
e933923aab15		0.73213	No_DR	No_DR	No_DR	1	0	0.73213
e966850247f4		0.735044	No_DR	No_DR	No_DR	1	0	0.735044
e9678824215d		0.592649	No_DR	No_DR	No_DR	1	0	0.592649
e97ecf4355cb		0.717454	No_DR	No_DR	No_DR	1	0	0.717454
e9ce5bf645ab		0.812808	No_DR	No_DR	No_DR	1	0	0.812808
e9f3c85a2a02		0.683745	No_DR	No_DR	No_DR	1	0	0.683745
e9faf0296643		0.12374	No_DR	No_DR	No_DR	1	0	0.12374
ea4ce9516144		0.6518	No_DR	No_DR	No_DR	1	0	0.6518
ea5c42a78979		0.711395	No_DR	No_DR	No_DR	1	0	0.711395
ea68b58a6e8f		0.768115	No_DR	No_DR	No_DR	1	0	0.768115
ea6a53e54d0f		0.299503	No_DR	No_DR	No_DR	1	0	0.299503
ea7e21bab610		0.719723	No_DR	No_DR	No_DR	1	0	0.719723
ea9c41e1ced0		0.710761	No_DR	No_DR	No_DR	1	0	0.710761
eabc7c716255		0.397797	No_DR	No_DR	No_DR	1	0	0.397797
eabf421f94d0		0.783394	No_DR	No_DR	No_DR	1	0	0.783394
eae70f527755		0.730042	No_DR	No_DR	No_DR	1	0	0.730042
eb050765b323		0.709738	No_DR	No_DR	No_DR	1	0	0.709738
eb175669d789		0.173922	No_DR	No_DR	No_DR	1	0	0.173922
eb6b1f1c09db		0.559119	No_DR	Moderate	Moderate	1	1	-0.440881
ebd96d853918		0.754837	No_DR	No_DR	No_DR	1	0	0.754837
ebf4b22240f4		0.797236	No_DR	No_DR	No_DR	1	0	0.797236
ec01f0862669		0.717473	No_DR	No_DR	No_DR	1	0	0.717473
ec0c9f817b03		0.628369	No_DR	No_DR	No_DR	1	0	0.628369
ec363f48867b		0.34418	No_DR	No_DR	Moderate	0	1	-0.65582
ec57cc20d776		0.559366	No_DR	No_DR	No_DR	1	0	0.559366
ec6659926105		0.707724	No_DR	No_DR	No_DR	1	0	0.707724
ec6f1797a25a		0.663116	No_DR	No_DR	No_DR	1	0	0.663116
ecad6845f630		0.138214	No_DR	No_DR	No_DR	1	0	0.138214
ecb4500285ed		0.670135	No_DR	No_DR	No_DR	1	0	0.670135
ed2c52c14493		0.692217	No_DR	No_DR	No_DR	1	0	0.692217
ed2ef440d22c		0.537759	No_DR	No_DR	No_DR	1	0	0.537759
ed3ce1674761		0.742403	No_DR	No_DR	No_DR	1	0	0.742403
ed648b9bcd95		0.34962	No_DR	No_DR	No_DR	1	0	0.34962
ed6bd9293a89		0.756297	No_DR	No_DR	No_DR	1	0	0.756297
eda1d75cbcf0		0.693685	No_DR	No_DR	No_DR	1	0	0.693685
eda29a9d78f3		0.693408	No_DR	No_DR	No_DR	1	0	0.693408
edceb0657d77		0.511433	No_DR	No_DR	No_DR	1	0	0.511433
ee36ca728641		0.684625	No_DR	No_DR	No_DR	1	0	0.684625
ee3f5cf52188		0.604084	No_DR	No_DR	No_DR	1	0	0.604084
ee3fe7809e6a		0.735555	No_DR	No_DR	No_DR	1	0	0.735555
ee77763a6afb		0.712335	No_DR	No_DR	No_DR	1	0	0.712335
eeaea2c5ff34		0.596671	No_DR	No_DR	No_DR	1	0	0.596671
eebd1e195952		0.57676	No_DR	No_DR	No_DR	1	0	0.57676
eedae6b28f96		0.445767	No_DR	No_DR	No_DR	1	0	0.445767
ef247f28004f		0.656365	No_DR	No_DR	No_DR	1	0	0.656365
ef4121e9bb67		0.813601	No_DR	No_DR	No_DR	1	0	0.813601
ef476be214d4		0.644709	No_DR	No_DR	No_DR	1	0	0.644709
ef48780f5d5f		0.662473	No_DR	No_DR	No_DR	1	0	0.662473
ef5155990874		0.774025	No_DR	No_DR	No_DR	1	0	0.774025
ef7eb85b75fc		0.752384	No_DR	No_DR	No_DR	1	0	0.752384
ef81cd8854cb		0.638527	No_DR	No_DR	No_DR	1	0	0.638527
ef8c39eb9157		0.751122	No_DR	No_DR	No_DR	1	0	0.751122
ef99c499d665		0.705334	No_DR	No_DR	No_DR	1	0	0.705334
f002ce614c59		0.312203	No_DR	No_DR	No_DR	1	0	0.312203
f00ce9b9d6f4		0.709389	No_DR	No_DR	No_DR	1	0	0.709389
f02057c41256		0.424079	No_DR	No_DR	No_DR	1	0	0.424079
f0267c42907c		0.673583	No_DR	No_DR	No_DR	1	0	0.673583
f02956bd7c50		0.672618	No_DR	No_DR	No_DR	1	0	0.672618
f02babb3a023		0.660945	No_DR	No_DR	No_DR	1	0	0.660945
f0546a45ef10		0.760175	No_DR	No_DR	No_DR	1	0	0.760175
f066db7a2efe		0.634846	No_DR	Mild	Mild	1	1	-0.365154
f06e7a9df795		0.275439	No_DR	No_DR	No_DR	1	0	0.275439
f0860c21533b		0.239179	No_DR	No_DR	No_DR	1	0	0.239179
f09cfc6a4dbd		0.759058	No_DR	No_DR	No_DR	1	0	0.759058
f09fd9433dff		0.780029	No_DR	No_DR	No_DR	1	0	0.780029
f0a2dc580009		0.560364	No_DR	No_DR	No_DR	1	0	0.560364
f0e1201b5c1f		0.662133	No_DR	No_DR	No_DR	1	0	0.662133
f1979147aad4		0.41703	No_DR	No_DR	No_DR	1	0	0.41703
f1d719c97838		0.709387	No_DR	No_DR	No_DR	1	0	0.709387
f233638e0e90		0.308563	No_DR	No_DR	No_DR	1	0	0.308563
f252046c0fe6		0.780291	No_DR	No_DR	No_DR	1	0	0.780291
f26b02ead915		0.639478	No_DR	No_DR	No_DR	1	0	0.639478
f298b7d05958		0.724233	No_DR	No_DR	No_DR	1	0	0.724233
f2c0b41acd05		0.589373	No_DR	No_DR	No_DR	1	0	0.589373
f2f569a64949		0.653002	No_DR	No_DR	No_DR	1	0	0.653002
f35d80bb1a22		0.801608	No_DR	No_DR	No_DR	1	0	0.801608
f361060eda3e		0.752812	No_DR	No_DR	No_DR	1	0	0.752812
f366fb1cc475		0.811104	No_DR	No_DR	No_DR	1	0	0.811104
f36cb007a1ef		0.762509	No_DR	No_DR	No_DR	1	0	0.762509
f3a4751af42e		0.790468	No_DR	No_DR	No_DR	1	0	0.790468
f3b27ac2d371		0.635618	No_DR	No_DR	No_DR	1	0	0.635618
f3bb996b45ce		0.752066	No_DR	No_DR	No_DR	1	0	0.752066
f42b693a9414		0.648275	No_DR	No_DR	No_DR	1	0	0.648275
f431f2e119d7		0.654876	No_DR	No_DR	No_DR	1	0	0.654876
f451eee2b66b		0.736064	No_DR	No_DR	No_DR	1	0	0.736064
f48241b0c995		0.735502	No_DR	No_DR	No_DR	1	0	0.735502
f4874247ede6		0.657421	No_DR	No_DR	No_DR	1	0	0.657421
f4c7ae514c54		0.700284	No_DR	No_DR	No_DR	1	0	0.700284
f4d3169b468a		0.739398	No_DR	No_DR	No_DR	1	0	0.739398
f4de9620e3f2		0.321129	No_DR	No_DR	No_DR	1	0	0.321129
f4df3d86688d		0.622644	No_DR	No_DR	No_DR	1	0	0.622644
f4e68b61f480		0.019168	No_DR	No_DR	No_DR	1	0	0.019168
f4ea2a2cfbb9		0.731124	No_DR	No_DR	No_DR	1	0	0.731124
f531232ecb55		0.800394	No_DR	No_DR	No_DR	1	0	0.800394
f56ff0440ed1		0	No_DR	No_DR	No_DR	1	0	0
f5733f77273d		0.690658	No_DR	No_DR	No_DR	1	0	0.690658
f57cf3b6f48e		0.726252	No_DR	No_DR	No_DR	1	0	0.726252
f580566e27f5		0.402797	No_DR	No_DR	No_DR	1	0	0.402797
f58cdfa968be		0.670855	No_DR	No_DR	No_DR	1	0	0.670855
f58f0b2fd718		0.753247	No_DR	No_DR	No_DR	1	0	0.753247
f5c953bee7cd		0.74832	No_DR	No_DR	No_DR	1	0	0.74832
f62b8a076833		0.591925	No_DR	No_DR	No_DR	1	0	0.591925
f633c474e8b8		0.734601	No_DR	No_DR	No_DR	1	0	0.734601
f64b6e85f1c9		0.657519	No_DR	No_DR	No_DR	1	0	0.657519
f66c4ee86629		0.38583	No_DR	No_DR	No_DR	1	0	0.38583
f68690db78d3		0.679967	No_DR	No_DR	No_DR	1	0	0.679967
f6d760566a51		0.740188	No_DR	No_DR	No_DR	1	0	0.740188
f7116e7b2f4e		0.681241	No_DR	No_DR	No_DR	1	0	0.681241
f71333204618		0.295464	No_DR	No_DR	No_DR	1	0	0.295464
f71aca5a7dc3		0.524211	No_DR	No_DR	No_DR	1	0	0.524211
f71bea807c96		0.662673	No_DR	No_DR	No_DR	1	0	0.662673
f7508f14dd7b		0.71109	No_DR	No_DR	No_DR	1	0	0.71109
f7735b6d47f7		0.733756	No_DR	No_DR	No_DR	1	0	0.733756
f7defe70afc3		0.205425	No_DR	No_DR	No_DR	1	0	0.205425
f7e9fa75c7c1		0.671843	No_DR	No_DR	No_DR	1	0	0.671843
f819c65b803c		0.28612	No_DR	No_DR	No_DR	1	0	0.28612
f85c78201a50		0.744693	No_DR	No_DR	No_DR	1	0	0.744693
f85fd4fac887		0.280528	No_DR	No_DR	No_DR	1	0	0.280528
f86d1c404acb		0.598567	No_DR	No_DR	No_DR	1	0	0.598567
f8d62557ad0c		0.263573	No_DR	No_DR	No_DR	1	0	0.263573
f8f5942b690e		0.157075	No_DR	No_DR	No_DR	1	0	0.157075
f90f8931a9bc		0.661519	No_DR	No_DR	No_DR	1	0	0.661519
f91cfa82b9d4		0.643463	No_DR	No_DR	No_DR	1	0	0.643463
f952ad2e4356		0.619635	No_DR	No_DR	No_DR	1	0	0.619635
f994a3b07935		0.775078	No_DR	No_DR	No_DR	1	0	0.775078
f9d52509c571		0.752744	No_DR	No_DR	No_DR	1	0	0.752744
f9d8ff3e6592		0.686409	No_DR	No_DR	No_DR	1	0	0.686409
f9e1c439d4c8		0.718252	No_DR	No_DR	No_DR	1	0	0.718252
fa0c87bd75ce		0.721618	No_DR	No_DR	No_DR	1	0	0.721618
fa573163dd8b		0.670704	No_DR	No_DR	No_DR	1	0	0.670704
fa6f3d8bb1d5		0.692448	No_DR	No_DR	No_DR	1	0	0.692448
fa7fa797c650		0.784644	No_DR	No_DR	No_DR	1	0	0.784644
fa9bece586fc		0.210618	No_DR	No_DR	No_DR	1	0	0.210618
fa9f1bc03f21		0.673779	No_DR	No_DR	No_DR	1	0	0.673779
fb1b8771c70a		0.739524	No_DR	No_DR	No_DR	1	0	0.739524
fb767cea406c		0.083128	No_DR	No_DR	No_DR	1	0	0.083128
fb88783de055		0.702093	No_DR	No_DR	No_DR	1	0	0.702093
fb88d23fc5fe		0.756987	No_DR	No_DR	No_DR	1	0	0.756987
fbcbc81cf9be		0.795575	No_DR	No_DR	No_DR	1	0	0.795575
fbdc796290d4		0.731401	No_DR	No_DR	No_DR	1	0	0.731401
fbfa925506f6		0.637889	No_DR	No_DR	No_DR	1	0	0.637889
fc782722a50c		0.658244	No_DR	No_DR	No_DR	1	0	0.658244
fc898dfeb24f		0.670887	No_DR	No_DR	No_DR	1	0	0.670887
fc8fce67fbf8		0.576276	No_DR	No_DR	No_DR	1	0	0.576276
fca1a8738b8a		0.79662	No_DR	No_DR	No_DR	1	0	0.79662
fcc32dffd24d		0.219115	No_DR	No_DR	No_DR	1	0	0.219115
fce73678f650		0.777044	No_DR	No_DR	No_DR	1	0	0.777044
fd079d2e93a2		0.630242	No_DR	No_DR	No_DR	1	0	0.630242
fd0a70082e7c		0.614557	No_DR	No_DR	No_DR	1	0	0.614557
fd4c946c52bf		0.453591	No_DR	No_DR	No_DR	1	0	0.453591
fd87b6b2e664		0.718496	No_DR	No_DR	No_DR	1	0	0.718496
fdbc252813b1		0.628653	No_DR	No_DR	No_DR	1	0	0.628653
fdc685055659		0.787525	No_DR	No_DR	No_DR	1	0	0.787525
fe06dad6851c		0.659161	No_DR	No_DR	No_DR	1	0	0.659161
fe0e2dee1834		0.616369	No_DR	No_DR	No_DR	1	0	0.616369
fe3b0e50be78		0.28662	No_DR	No_DR	No_DR	1	0	0.28662
fe3f62695b2d		0.745226	No_DR	No_DR	No_DR	1	0	0.745226
febfb20dc311		0.673274	No_DR	No_DR	No_DR	1	0	0.673274
fed5bb685832		0.735033	No_DR	No_DR	No_DR	1	0	0.735033
fefded6bf135		0.327917	No_DR	No_DR	Moderate	0	1	-0.672083
ff03f74667df		0.68157	No_DR	No_DR	No_DR	1	0	0.68157
ff1e940105f9		0.783251	No_DR	No_DR	No_DR	1	0	0.783251
ff4832d55461		0.451453	No_DR	No_DR	No_DR	1	0	0.451453
ff4955e76894		0.563825	No_DR	Mild	Mild	1	1	-0.436175
ff4cd992667b		0.385443	No_DR	No_DR	No_DR	1	0	0.385443
ff59d44a70a7		0.676421	No_DR	No_DR	No_DR	1	0	0.676421
ff631653374e		0.676015	No_DR	No_DR	No_DR	1	0	0.676015
ffc04fed30e6		0.462918	No_DR	No_DR	No_DR	1	0	0.462918
ffd97f8cd5aa		0.609015	No_DR	No_DR	No_DR	1	0	0.609015
						355	13	205.736

## Sheet: NODR_1_alexnet_efficientnetb0
		Activation Maps Consensus		Network 1	Network 2
Immagine	Immagine	Gradcam-Consensus	True_Label	Alexnet_Scratch	Densenet_Scratch	Predict_Consensus	Penalty	Trustability
cfb17a7cc8d4		0.70677	No_DR	No_DR	No_DR	1	0	0.70677
cfdbaef73a8b		0.239424	No_DR	No_DR	No_DR	1	0	0.239424
cfed7c1172ec		0.821207	No_DR	No_DR	No_DR	1	0	0.821207
cff262ed8f4c		0.441758	No_DR	No_DR	No_DR	1	0	0.441758
cffc50047828		0.571831	No_DR	No_DR	No_DR	1	0	0.571831
d02b79fc3200		0.731958	No_DR	No_DR	No_DR	1	0	0.731958
d0926ed2c8e5		0.745675	No_DR	No_DR	No_DR	1	0	0.745675
d160ebef4117		0.344094	No_DR	No_DR	No_DR	1	0	0.344094
d16e39b9d6f0		0.526305	No_DR	No_DR	No_DR	1	0	0.526305
d16e59a2b33a		0.580846	No_DR	No_DR	No_DR	1	0	0.580846
d18f6431ebce		0.745559	No_DR	No_DR	No_DR	1	0	0.745559
d1a60c3b9fe5		0.546695	No_DR	No_DR	No_DR	1	0	0.546695
d1afdb8cf70d		0.760034	No_DR	No_DR	No_DR	1	0	0.760034
d1b279cc02ae		0.671277	No_DR	No_DR	No_DR	1	0	0.671277
d1ca85af57c9		0.59134	No_DR	No_DR	No_DR	1	0	0.59134
d1cf31577a59		0.368163	No_DR	No_DR	No_DR	1	0	0.368163
d1f7ea924a01		0.566798	No_DR	No_DR	No_DR	1	0	0.566798
d1fa0f744620		0.562676	No_DR	No_DR	No_DR	1	0	0.562676
d26bb2ed6e71		0.588092	No_DR	No_DR	No_DR	1	0	0.588092
d26bc6e1230d		0.763413	No_DR	No_DR	No_DR	1	0	0.763413
d27ac9e54901		0.616005	No_DR	No_DR	No_DR	1	0	0.616005
d29b37d110f3		0.531413	No_DR	No_DR	No_DR	1	0	0.531413
d2afca74cbc3		0.535795	No_DR	No_DR	No_DR	1	0	0.535795
d2c5fb82fe5f		0.598909	No_DR	No_DR	No_DR	1	0	0.598909
d2cd47ed2c1d		0.624207	No_DR	No_DR	No_DR	1	0	0.624207
d2d523e9f669		0.595991	No_DR	No_DR	No_DR	1	0	0.595991
d2dc86021c67		0.688269	No_DR	No_DR	No_DR	1	0	0.688269
d2fb715b0c41		0.682186	No_DR	No_DR	No_DR	1	0	0.682186
d30d079e6f9a		0.783773	No_DR	No_DR	No_DR	1	0	0.783773
d332d7b8a26e		0.689495	No_DR	No_DR	No_DR	1	0	0.689495
d38cf0f4a9af		0.75921	No_DR	No_DR	No_DR	1	0	0.75921
d39752cb6e57		0.723557	No_DR	No_DR	No_DR	1	0	0.723557
d3dfd0a2dee6		0.566932	No_DR	No_DR	No_DR	1	0	0.566932
d3e56584a481		0.543766	No_DR	No_DR	No_DR	1	0	0.543766
d436c06f0490		0.763842	No_DR	No_DR	No_DR	1	0	0.763842
d4583e9525dc		0.435213	No_DR	No_DR	No_DR	1	0	0.435213
d4bc001f7224		0.55511	No_DR	No_DR	No_DR	1	0	0.55511
d516f77d4516		0.612109	No_DR	No_DR	No_DR	1	0	0.612109
d51c2153d151		0.547128	No_DR	No_DR	No_DR	1	0	0.547128
d51e5d7484ea		0.63079	No_DR	No_DR	No_DR	1	0	0.63079
d56d32a1d62d		0.622894	No_DR	No_DR	No_DR	1	0	0.622894
d57d1be1bbd1		0.116462	No_DR	No_DR	No_DR	1	0	0.116462
d5ad3362424c		0.348931	No_DR	No_DR	No_DR	1	0	0.348931
d5c63a8d9e94		0.72475	No_DR	No_DR	No_DR	1	0	0.72475
d6130f2ec903		0.282708	No_DR	No_DR	No_DR	1	0	0.282708
d667af5742f6		0.564107	No_DR	No_DR	No_DR	1	0	0.564107
d6803e467592		0.560874	No_DR	No_DR	No_DR	1	0	0.560874
d69698f838db		0.634333	No_DR	No_DR	No_DR	1	0	0.634333
d6b109c82067		0.725085	No_DR	No_DR	No_DR	1	0	0.725085
d6dbb0820ea5		0.673785	No_DR	No_DR	No_DR	1	0	0.673785
d6df4fe492ec		0.71061	No_DR	No_DR	No_DR	1	0	0.71061
d6f36ec5564a		0.531279	No_DR	No_DR	No_DR	1	0	0.531279
d6f6bdfd8011		0.557044	No_DR	No_DR	No_DR	1	0	0.557044
d7078e8b0349		0.535341	No_DR	No_DR	No_DR	1	0	0.535341
d74ccc796517		0.820719	No_DR	No_DR	No_DR	1	0	0.820719
d774692d9919		0.642775	No_DR	No_DR	No_DR	1	0	0.642775
d78b7401096f		0.174722	No_DR	No_DR	No_DR	1	0	0.174722
d7a01fca9838		0.562236	No_DR	No_DR	No_DR	1	0	0.562236
d7ab5c040294		0.530572	No_DR	No_DR	No_DR	1	0	0.530572
d7ac4a0c9760		0.661695	No_DR	No_DR	No_DR	1	0	0.661695
d7bc00091cfc		0.539514	No_DR	No_DR	No_DR	1	0	0.539514
d7bc62d60e8c		0.348081	No_DR	No_DR	No_DR	1	0	0.348081
d7e5fe5245e0		0.655121	No_DR	No_DR	Mild	0	1	-0.344879
d807c53c1399		0.666688	No_DR	No_DR	No_DR	1	0	0.666688
d838d5b9f571		0.71379	No_DR	No_DR	No_DR	1	0	0.71379
d844a7252f4e		0.445949	No_DR	No_DR	Moderate	0	1	-0.554051
d865997a6280		0.592284	No_DR	No_DR	No_DR	1	0	0.592284
d866c26d76f0		0.563417	No_DR	No_DR	No_DR	1	0	0.563417
d871895742b1		0.279674	No_DR	No_DR	No_DR	1	0	0.279674
d881c04f01fe		0.772205	No_DR	No_DR	No_DR	1	0	0.772205
d88c4843aec3		0.737154	No_DR	No_DR	No_DR	1	0	0.737154
d8da9de62743		0.706189	No_DR	No_DR	No_DR	1	0	0.706189
d911dd40c63b		0.750541	No_DR	No_DR	No_DR	1	0	0.750541
d91635f380b4		0.446452	No_DR	No_DR	No_DR	1	0	0.446452
d93b61dc8f64		0.208061	No_DR	Moderate	No_DR	0	1	-0.791939
d97911a32918		0.691257	No_DR	No_DR	No_DR	1	0	0.691257
d99b0f7dd9b9		0.69801	No_DR	No_DR	No_DR	1	0	0.69801
d99dd99be001		0.638484	No_DR	No_DR	No_DR	1	0	0.638484
d9ad2a0ec026		0.74331	No_DR	No_DR	No_DR	1	0	0.74331
d9c9b9786da3		0.679229	No_DR	No_DR	No_DR	1	0	0.679229
d9d2631f043c		0.296425	No_DR	No_DR	No_DR	1	0	0.296425
d9e58e4d8689		0.618991	No_DR	Moderate	No_DR	0	1	-0.381009
da0a83f074f3		0.563667	No_DR	No_DR	No_DR	1	0	0.563667
da2bdf4236ac		0.631191	No_DR	No_DR	No_DR	1	0	0.631191
da3a2275c850		0.727786	No_DR	No_DR	No_DR	1	0	0.727786
da6389d129aa		0.415612	No_DR	Moderate	No_DR	0	1	-0.584388
da6bbb76d562		0.063829	No_DR	No_DR	No_DR	1	0	0.063829
da9262d9f5d9		0.66848	No_DR	No_DR	No_DR	1	0	0.66848
da949aa67a4f		0.608199	No_DR	No_DR	No_DR	1	0	0.608199
da9574d35b82		0.377614	No_DR	No_DR	No_DR	1	0	0.377614
da9fe02dead3		0.597792	No_DR	No_DR	No_DR	1	0	0.597792
daad7b617f21		0.446651	No_DR	No_DR	No_DR	1	0	0.446651
daff5427c9b2		0.525492	No_DR	No_DR	No_DR	1	0	0.525492
db3cd58aa315		0.559626	No_DR	No_DR	No_DR	1	0	0.559626
db52626d450c		0.68298	No_DR	No_DR	No_DR	1	0	0.68298
db6207e62c7b		0.538476	No_DR	No_DR	No_DR	1	0	0.538476
dc0eea0b68a7		0.132722	No_DR	No_DR	No_DR	1	0	0.132722
dc0f6e5b489b		0.669231	No_DR	No_DR	No_DR	1	0	0.669231
dcc6c0ad5cad		0.132319	No_DR	No_DR	No_DR	1	0	0.132319
dccdf750c962		0.704483	No_DR	No_DR	No_DR	1	0	0.704483
dce73d90c00c		0.737464	No_DR	No_DR	No_DR	1	0	0.737464
dcf109df1a2b		0.548334	No_DR	No_DR	No_DR	1	0	0.548334
dd02d60bef14		0.547678	No_DR	No_DR	No_DR	1	0	0.547678
dd285d9e97fe		0.677429	No_DR	No_DR	No_DR	1	0	0.677429
dd3176bacfe2		0.209804	No_DR	No_DR	No_DR	1	0	0.209804
dd90c321d7bc		0.553689	No_DR	No_DR	No_DR	1	0	0.553689
ddb222ff7c1d		0.574415	No_DR	No_DR	No_DR	1	0	0.574415
de18071c36e6		0.52726	No_DR	No_DR	No_DR	1	0	0.52726
de2eb5c8aa83		0.43836	No_DR	No_DR	No_DR	1	0	0.43836
de38adaae009		0.143403	No_DR	No_DR	No_DR	1	0	0.143403
de4cdabbce6d		0.566628	No_DR	No_DR	No_DR	1	0	0.566628
de55ed25e0e8		0.651193	No_DR	No_DR	No_DR	1	0	0.651193
de57c9e9fa93		0.660133	No_DR	No_DR	Moderate	0	1	-0.339867
de6210f88536		0.761001	No_DR	No_DR	No_DR	1	0	0.761001
de730033c683		0.215483	No_DR	No_DR	No_DR	1	0	0.215483
dea7538bb91a		0.398948	No_DR	No_DR	No_DR	1	0	0.398948
dec5595e6154		0.679337	No_DR	No_DR	No_DR	1	0	0.679337
dee1031a76ae		0.239299	No_DR	No_DR	No_DR	1	0	0.239299
dee31065f8fe		0.6554	No_DR	No_DR	No_DR	1	0	0.6554
df0886f1e76b		0.604918	No_DR	No_DR	No_DR	1	0	0.604918
df6d13d04da1		0.635182	No_DR	No_DR	No_DR	1	0	0.635182
df9cb3729eb1		0.632522	No_DR	No_DR	No_DR	1	0	0.632522
dfc7ec7db0e0		0.763726	No_DR	No_DR	No_DR	1	0	0.763726
dfea19863428		0.439863	No_DR	No_DR	No_DR	1	0	0.439863
e01b7bac822b		0.572922	No_DR	No_DR	No_DR	1	0	0.572922
e0313be77035		0.573808	No_DR	No_DR	No_DR	1	0	0.573808
e03a74e7d74f		0.38197	No_DR	No_DR	No_DR	1	0	0.38197
e04f3c6619a3		0.764321	No_DR	No_DR	No_DR	1	0	0.764321
e067b06fd655		0.771005	No_DR	No_DR	No_DR	1	0	0.771005
e06cccc08c59		0.662239	No_DR	No_DR	No_DR	1	0	0.662239
e087bd4b88f2		0.547063	No_DR	No_DR	No_DR	1	0	0.547063
e0d229db881a		0.777661	No_DR	No_DR	No_DR	1	0	0.777661
e12df54e0d1e		0.663343	No_DR	No_DR	No_DR	1	0	0.663343
e12f9f19d1be		0.646471	No_DR	No_DR	No_DR	1	0	0.646471
e135d7ba9a0e		0.518496	No_DR	No_DR	No_DR	1	0	0.518496
e160a3b19911		0.541375	No_DR	No_DR	No_DR	1	0	0.541375
e16af45285e5		0.532662	No_DR	No_DR	No_DR	1	0	0.532662
e1ab92228e60		0.350128	No_DR	Mild	Mild	1	1	-0.649872
e1b8acb1cea1		0.681748	No_DR	No_DR	No_DR	1	0	0.681748
e1c02f6c3362		0.628374	No_DR	No_DR	No_DR	1	0	0.628374
e1dc02a3dc2a		0.604185	No_DR	No_DR	No_DR	1	0	0.604185
e2265c383348		0.600887	No_DR	No_DR	No_DR	1	0	0.600887
e246cd89e1cc		0.696974	No_DR	No_DR	No_DR	1	0	0.696974
e251bdf05b85		0.132635	No_DR	No_DR	No_DR	1	0	0.132635
e26bcae6c67b		0.096777	No_DR	No_DR	No_DR	1	0	0.096777
e29e54ff921e		0.609744	No_DR	No_DR	No_DR	1	0	0.609744
e2c39ed0c941		0.771549	No_DR	No_DR	No_DR	1	0	0.771549
e2c3b037413b		0.546025	No_DR	Mild	Mild	1	1	-0.453975
e2ec22b3d07e		0.314174	No_DR	No_DR	No_DR	1	0	0.314174
e30a890600e1		0.112934	No_DR	No_DR	No_DR	1	0	0.112934
e322acd46152		0.535013	No_DR	No_DR	No_DR	1	0	0.535013
e33766353db2		0.473229	No_DR	No_DR	No_DR	1	0	0.473229
e3b47ed5b511		0.731987	No_DR	No_DR	No_DR	1	0	0.731987
e3cd96cb094c		0.581262	No_DR	No_DR	No_DR	1	0	0.581262
e42d9a94a66d		0.252208	No_DR	No_DR	No_DR	1	0	0.252208
e47452069ea1		0.602906	No_DR	No_DR	No_DR	1	0	0.602906
e47770a2e5d1		0.316719	No_DR	No_DR	No_DR	1	0	0.316719
e4a44f9158dc		0.659234	No_DR	No_DR	No_DR	1	0	0.659234
e4ae1ee6aada		0.728745	No_DR	No_DR	No_DR	1	0	0.728745
e4b0df29b96f		0.632521	No_DR	No_DR	No_DR	1	0	0.632521
e4c799738a19		0.648095	No_DR	No_DR	No_DR	1	0	0.648095
e4d3d437b0a8		0.58672	No_DR	No_DR	No_DR	1	0	0.58672
e4dcca36ceb4		0.696075	No_DR	No_DR	No_DR	1	0	0.696075
e50b0174690d		0.743253	No_DR	No_DR	No_DR	1	0	0.743253
e5197d77ec68		0.316569	No_DR	No_DR	No_DR	1	0	0.316569
e529c5757d64		0.643206	No_DR	No_DR	No_DR	1	0	0.643206
e582e56e7942		0.659	No_DR	No_DR	No_DR	1	0	0.659
e594c19e2e1d		0.67097	No_DR	No_DR	No_DR	1	0	0.67097
e59c5f345bb0		0.584512	No_DR	No_DR	No_DR	1	0	0.584512
e5de79795c1d		0.279808	No_DR	No_DR	No_DR	1	0	0.279808
e5f332efcbc7		0.517796	No_DR	No_DR	No_DR	1	0	0.517796
e5f73f2855c0		0.684413	No_DR	No_DR	No_DR	1	0	0.684413
e60e4edb3ca9		0.628047	No_DR	No_DR	No_DR	1	0	0.628047
e632e38fd2d4		0.079899	No_DR	No_DR	No_DR	1	0	0.079899
e6552b7432b3		0.794538	No_DR	No_DR	No_DR	1	0	0.794538
e66855a5c583		0.720221	No_DR	No_DR	No_DR	1	0	0.720221
e66ad813a508		0.707864	No_DR	No_DR	No_DR	1	0	0.707864
e68746d426b2		0.410792	No_DR	No_DR	No_DR	1	0	0.410792
e68bdd36e589		0.193249	No_DR	No_DR	No_DR	1	0	0.193249
e69b48516577		0.170676	No_DR	No_DR	No_DR	1	0	0.170676
e6a5e4718873		0.649323	No_DR	No_DR	No_DR	1	0	0.649323
e7291472109b		0.542258	No_DR	No_DR	No_DR	1	0	0.542258
e7578d8dba72		0.527059	No_DR	No_DR	No_DR	1	0	0.527059
e77a93c3d9a9		0.21759	No_DR	No_DR	No_DR	1	0	0.21759
e79e10907295		0.586349	No_DR	No_DR	No_DR	1	0	0.586349
e7b5dd5bab1f		0.603739	No_DR	No_DR	No_DR	1	0	0.603739
e81f4a2fbbdc		0.173942	No_DR	No_DR	No_DR	1	0	0.173942
e82232a3c28b		0.688043	No_DR	No_DR	No_DR	1	0	0.688043
e893e86dde94		0.767507	No_DR	No_DR	No_DR	1	0	0.767507
e8ddfc9709ce		0.667957	No_DR	No_DR	No_DR	1	0	0.667957
e8e44b3160e3		0.625841	No_DR	No_DR	No_DR	1	0	0.625841
e907d23cce3d		0.590733	No_DR	No_DR	No_DR	1	0	0.590733
e933923aab15		0.607566	No_DR	No_DR	No_DR	1	0	0.607566
e966850247f4		0.782041	No_DR	No_DR	No_DR	1	0	0.782041
e9678824215d		0.601538	No_DR	No_DR	No_DR	1	0	0.601538
e97ecf4355cb		0.690058	No_DR	No_DR	No_DR	1	0	0.690058
e9ce5bf645ab		0.798813	No_DR	No_DR	No_DR	1	0	0.798813
e9f3c85a2a02		0.549677	No_DR	No_DR	No_DR	1	0	0.549677
e9faf0296643		0.047936	No_DR	No_DR	No_DR	1	0	0.047936
ea4ce9516144		0.584377	No_DR	No_DR	No_DR	1	0	0.584377
ea5c42a78979		0.707537	No_DR	No_DR	No_DR	1	0	0.707537
ea68b58a6e8f		0.73456	No_DR	No_DR	No_DR	1	0	0.73456
ea6a53e54d0f		0.362805	No_DR	No_DR	No_DR	1	0	0.362805
ea7e21bab610		0.599109	No_DR	No_DR	No_DR	1	0	0.599109
ea9c41e1ced0		0.678787	No_DR	No_DR	No_DR	1	0	0.678787
eabc7c716255		0.336979	No_DR	No_DR	No_DR	1	0	0.336979
eabf421f94d0		0.580414	No_DR	No_DR	No_DR	1	0	0.580414
eae70f527755		0.592856	No_DR	No_DR	No_DR	1	0	0.592856
eb050765b323		0.660786	No_DR	No_DR	No_DR	1	0	0.660786
eb175669d789		0.4323	No_DR	No_DR	No_DR	1	0	0.4323
eb6b1f1c09db		0.319408	No_DR	Moderate	Moderate	1	1	-0.680592
ebd96d853918		0.692317	No_DR	No_DR	No_DR	1	0	0.692317
ebf4b22240f4		0.591593	No_DR	No_DR	No_DR	1	0	0.591593
ec01f0862669		0.69954	No_DR	No_DR	No_DR	1	0	0.69954
ec0c9f817b03		0.703705	No_DR	No_DR	No_DR	1	0	0.703705
ec363f48867b		0.298204	No_DR	No_DR	No_DR	1	0	0.298204
ec57cc20d776		0.539435	No_DR	No_DR	No_DR	1	0	0.539435
ec6659926105		0.54617	No_DR	No_DR	No_DR	1	0	0.54617
ec6f1797a25a		0.666612	No_DR	No_DR	No_DR	1	0	0.666612
ecad6845f630		0.162287	No_DR	No_DR	No_DR	1	0	0.162287
ecb4500285ed		0.53966	No_DR	No_DR	No_DR	1	0	0.53966
ed2c52c14493		0.714514	No_DR	No_DR	No_DR	1	0	0.714514
ed2ef440d22c		0.248923	No_DR	No_DR	No_DR	1	0	0.248923
ed3ce1674761		0.662076	No_DR	No_DR	No_DR	1	0	0.662076
ed648b9bcd95		0.380235	No_DR	No_DR	No_DR	1	0	0.380235
ed6bd9293a89		0.765416	No_DR	No_DR	No_DR	1	0	0.765416
eda1d75cbcf0		0.664398	No_DR	No_DR	No_DR	1	0	0.664398
eda29a9d78f3		0.759334	No_DR	No_DR	No_DR	1	0	0.759334
edceb0657d77		0.533467	No_DR	No_DR	No_DR	1	0	0.533467
ee36ca728641		0.606194	No_DR	No_DR	No_DR	1	0	0.606194
ee3f5cf52188		0.543816	No_DR	No_DR	No_DR	1	0	0.543816
ee3fe7809e6a		0.660626	No_DR	No_DR	No_DR	1	0	0.660626
ee77763a6afb		0.601784	No_DR	No_DR	No_DR	1	0	0.601784
eeaea2c5ff34		0.553003	No_DR	No_DR	No_DR	1	0	0.553003
eebd1e195952		0.527402	No_DR	No_DR	No_DR	1	0	0.527402
eedae6b28f96		0.425801	No_DR	No_DR	No_DR	1	0	0.425801
ef247f28004f		0.634131	No_DR	No_DR	No_DR	1	0	0.634131
ef4121e9bb67		0.774896	No_DR	No_DR	No_DR	1	0	0.774896
ef476be214d4		0.553064	No_DR	No_DR	No_DR	1	0	0.553064
ef48780f5d5f		0.624029	No_DR	No_DR	No_DR	1	0	0.624029
ef5155990874		0.764858	No_DR	No_DR	No_DR	1	0	0.764858
ef7eb85b75fc		0.702188	No_DR	No_DR	No_DR	1	0	0.702188
ef81cd8854cb		0.601127	No_DR	No_DR	No_DR	1	0	0.601127
ef8c39eb9157		0.633706	No_DR	No_DR	No_DR	1	0	0.633706
ef99c499d665		0.78334	No_DR	No_DR	No_DR	1	0	0.78334
f002ce614c59		0.361931	No_DR	No_DR	No_DR	1	0	0.361931
f00ce9b9d6f4		0.673299	No_DR	No_DR	No_DR	1	0	0.673299
f02057c41256		0.499136	No_DR	No_DR	No_DR	1	0	0.499136
f0267c42907c		0.665011	No_DR	No_DR	No_DR	1	0	0.665011
f02956bd7c50		0.572034	No_DR	No_DR	No_DR	1	0	0.572034
f02babb3a023		0.633033	No_DR	No_DR	No_DR	1	0	0.633033
f0546a45ef10		0.752756	No_DR	No_DR	No_DR	1	0	0.752756
f066db7a2efe		0.561941	No_DR	Mild	Mild	1	1	-0.438059
f06e7a9df795		0	No_DR	No_DR	No_DR	1	0	0
f0860c21533b		0.299896	No_DR	No_DR	No_DR	1	0	0.299896
f09cfc6a4dbd		0.619267	No_DR	No_DR	No_DR	1	0	0.619267
f09fd9433dff		0.590056	No_DR	No_DR	No_DR	1	0	0.590056
f0a2dc580009		0.568609	No_DR	No_DR	No_DR	1	0	0.568609
f0e1201b5c1f		0.512061	No_DR	No_DR	No_DR	1	0	0.512061
f1979147aad4		0.276279	No_DR	No_DR	No_DR	1	0	0.276279
f1d719c97838		0.603792	No_DR	No_DR	No_DR	1	0	0.603792
f233638e0e90		0.345251	No_DR	No_DR	No_DR	1	0	0.345251
f252046c0fe6		0.659494	No_DR	No_DR	No_DR	1	0	0.659494
f26b02ead915		0.601677	No_DR	No_DR	No_DR	1	0	0.601677
f298b7d05958		0.764928	No_DR	No_DR	No_DR	1	0	0.764928
f2c0b41acd05		0.562021	No_DR	No_DR	No_DR	1	0	0.562021
f2f569a64949		0.675876	No_DR	No_DR	No_DR	1	0	0.675876
f35d80bb1a22		0.739226	No_DR	No_DR	No_DR	1	0	0.739226
f361060eda3e		0.666329	No_DR	No_DR	No_DR	1	0	0.666329
f366fb1cc475		0.704642	No_DR	No_DR	No_DR	1	0	0.704642
f36cb007a1ef		0.767736	No_DR	No_DR	No_DR	1	0	0.767736
f3a4751af42e		0.76168	No_DR	No_DR	No_DR	1	0	0.76168
f3b27ac2d371		0.618001	No_DR	No_DR	No_DR	1	0	0.618001
f3bb996b45ce		0.662843	No_DR	No_DR	No_DR	1	0	0.662843
f42b693a9414		0.57372	No_DR	No_DR	No_DR	1	0	0.57372
f431f2e119d7		0.494798	No_DR	No_DR	No_DR	1	0	0.494798
f451eee2b66b		0.706994	No_DR	No_DR	No_DR	1	0	0.706994
f48241b0c995		0.599415	No_DR	No_DR	No_DR	1	0	0.599415
f4874247ede6		0.697053	No_DR	No_DR	No_DR	1	0	0.697053
f4c7ae514c54		0.662939	No_DR	No_DR	No_DR	1	0	0.662939
f4d3169b468a		0.617183	No_DR	No_DR	No_DR	1	0	0.617183
f4de9620e3f2		0.111591	No_DR	No_DR	No_DR	1	0	0.111591
f4df3d86688d		0.554124	No_DR	No_DR	No_DR	1	0	0.554124
f4e68b61f480		0.042069	No_DR	No_DR	No_DR	1	0	0.042069
f4ea2a2cfbb9		0.715336	No_DR	No_DR	No_DR	1	0	0.715336
f531232ecb55		0.767339	No_DR	No_DR	No_DR	1	0	0.767339
f56ff0440ed1		0.021625	No_DR	No_DR	No_DR	1	0	0.021625
f5733f77273d		0.557223	No_DR	No_DR	No_DR	1	0	0.557223
f57cf3b6f48e		0.650644	No_DR	No_DR	No_DR	1	0	0.650644
f580566e27f5		0.513112	No_DR	No_DR	No_DR	1	0	0.513112
f58cdfa968be		0.556019	No_DR	No_DR	No_DR	1	0	0.556019
f58f0b2fd718		0.711485	No_DR	No_DR	No_DR	1	0	0.711485
f5c953bee7cd		0.772795	No_DR	No_DR	No_DR	1	0	0.772795
f62b8a076833		0.640348	No_DR	No_DR	No_DR	1	0	0.640348
f633c474e8b8		0.735447	No_DR	No_DR	No_DR	1	0	0.735447
f64b6e85f1c9		0.597135	No_DR	No_DR	No_DR	1	0	0.597135
f66c4ee86629		0.135408	No_DR	No_DR	No_DR	1	0	0.135408
f68690db78d3		0.580545	No_DR	No_DR	No_DR	1	0	0.580545
f6d760566a51		0.684208	No_DR	No_DR	No_DR	1	0	0.684208
f7116e7b2f4e		0.674306	No_DR	No_DR	No_DR	1	0	0.674306
f71333204618		0.251627	No_DR	No_DR	No_DR	1	0	0.251627
f71aca5a7dc3		0.454051	No_DR	No_DR	No_DR	1	0	0.454051
f71bea807c96		0.708562	No_DR	No_DR	No_DR	1	0	0.708562
f7508f14dd7b		0.635967	No_DR	No_DR	No_DR	1	0	0.635967
f7735b6d47f7		0.63794	No_DR	No_DR	No_DR	1	0	0.63794
f7defe70afc3		0.157822	No_DR	No_DR	No_DR	1	0	0.157822
f7e9fa75c7c1		0.652414	No_DR	No_DR	No_DR	1	0	0.652414
f819c65b803c		0.545265	No_DR	No_DR	No_DR	1	0	0.545265
f85c78201a50		0.727636	No_DR	No_DR	No_DR	1	0	0.727636
f85fd4fac887		0.20194	No_DR	No_DR	No_DR	1	0	0.20194
f86d1c404acb		0.564245	No_DR	No_DR	No_DR	1	0	0.564245
f8d62557ad0c		0.326307	No_DR	No_DR	No_DR	1	0	0.326307
f8f5942b690e		0.423844	No_DR	No_DR	No_DR	1	0	0.423844
f90f8931a9bc		0.705229	No_DR	No_DR	No_DR	1	0	0.705229
f91cfa82b9d4		0.536917	No_DR	No_DR	No_DR	1	0	0.536917
f952ad2e4356		0.562744	No_DR	No_DR	No_DR	1	0	0.562744
f994a3b07935		0.804864	No_DR	No_DR	No_DR	1	0	0.804864
f9d52509c571		0.796271	No_DR	No_DR	No_DR	1	0	0.796271
f9d8ff3e6592		0.619828	No_DR	No_DR	No_DR	1	0	0.619828
f9e1c439d4c8		0.690033	No_DR	No_DR	No_DR	1	0	0.690033
fa0c87bd75ce		0.730627	No_DR	No_DR	No_DR	1	0	0.730627
fa573163dd8b		0.626613	No_DR	No_DR	No_DR	1	0	0.626613
fa6f3d8bb1d5		0.687874	No_DR	No_DR	No_DR	1	0	0.687874
fa7fa797c650		0.669695	No_DR	No_DR	No_DR	1	0	0.669695
fa9bece586fc		0	No_DR	No_DR	No_DR	1	0	0
fa9f1bc03f21		0.753032	No_DR	No_DR	No_DR	1	0	0.753032
fb1b8771c70a		0.696222	No_DR	No_DR	No_DR	1	0	0.696222
fb767cea406c		0.260381	No_DR	No_DR	No_DR	1	0	0.260381
fb88783de055		0.510024	No_DR	No_DR	No_DR	1	0	0.510024
fb88d23fc5fe		0.728948	No_DR	No_DR	No_DR	1	0	0.728948
fbcbc81cf9be		0.803652	No_DR	No_DR	No_DR	1	0	0.803652
fbdc796290d4		0.682645	No_DR	No_DR	No_DR	1	0	0.682645
fbfa925506f6		0.62995	No_DR	No_DR	No_DR	1	0	0.62995
fc782722a50c		0.702058	No_DR	No_DR	No_DR	1	0	0.702058
fc898dfeb24f		0.507849	No_DR	No_DR	No_DR	1	0	0.507849
fc8fce67fbf8		0.540796	No_DR	No_DR	No_DR	1	0	0.540796
fca1a8738b8a		0.736032	No_DR	No_DR	No_DR	1	0	0.736032
fcc32dffd24d		0.113023	No_DR	No_DR	No_DR	1	0	0.113023
fce73678f650		0.75006	No_DR	No_DR	Moderate	0	1	-0.24994
fd079d2e93a2		0.541123	No_DR	No_DR	No_DR	1	0	0.541123
fd0a70082e7c		0.647806	No_DR	No_DR	No_DR	1	0	0.647806
fd4c946c52bf		0.506113	No_DR	No_DR	No_DR	1	0	0.506113
fd87b6b2e664		0.592318	No_DR	No_DR	No_DR	1	0	0.592318
fdbc252813b1		0.631334	No_DR	No_DR	No_DR	1	0	0.631334
fdc685055659		0.672003	No_DR	No_DR	No_DR	1	0	0.672003
fe06dad6851c		0.568683	No_DR	No_DR	No_DR	1	0	0.568683
fe0e2dee1834		0.600909	No_DR	No_DR	No_DR	1	0	0.600909
fe3b0e50be78		0.150998	No_DR	No_DR	No_DR	1	0	0.150998
fe3f62695b2d		0.601766	No_DR	No_DR	No_DR	1	0	0.601766
febfb20dc311		0.660487	No_DR	No_DR	No_DR	1	0	0.660487
fed5bb685832		0.738929	No_DR	No_DR	No_DR	1	0	0.738929
fefded6bf135		0.430069	No_DR	No_DR	No_DR	1	0	0.430069
ff03f74667df		0.57384	No_DR	No_DR	No_DR	1	0	0.57384
ff1e940105f9		0.806519	No_DR	No_DR	No_DR	1	0	0.806519
ff4832d55461		0.489923	No_DR	No_DR	No_DR	1	0	0.489923
ff4955e76894		0.58884	No_DR	Mild	Mild	1	1	-0.41116
ff4cd992667b		0.26057	No_DR	No_DR	No_DR	1	0	0.26057
ff59d44a70a7		0.558174	No_DR	No_DR	No_DR	1	0	0.558174
ff631653374e		0.693805	No_DR	No_DR	No_DR	1	0	0.693805
ffc04fed30e6		0.466189	No_DR	No_DR	No_DR	1	0	0.466189
ffd97f8cd5aa		0.67275	No_DR	No_DR	No_DR	1	0	0.67275
						354	12	191.53

## Sheet: NODR_1_alexnet_googlenet
		Activation Maps Consensus		Network 1	Network 2
Immagine	Immagine	Gradcam-Consensus	True_Label	Alexnet_Scratch	Densenet_Scratch	Predict_Consensus	Penalty	Trustability
cfb17a7cc8d4		0.724577	No_DR	No_DR	No_DR	1	0	0.724577
cfdbaef73a8b		0.62604	No_DR	No_DR	No_DR	1	0	0.62604
cfed7c1172ec		0.594358	No_DR	No_DR	No_DR	1	0	0.594358
cff262ed8f4c		0.431208	No_DR	No_DR	No_DR	1	0	0.431208
cffc50047828		0.438292	No_DR	No_DR	No_DR	1	0	0.438292
d02b79fc3200		0.550426	No_DR	No_DR	No_DR	1	0	0.550426
d0926ed2c8e5		0.631514	No_DR	No_DR	No_DR	1	0	0.631514
d160ebef4117		0.237984	No_DR	No_DR	No_DR	1	0	0.237984
d16e39b9d6f0		0.411918	No_DR	No_DR	No_DR	1	0	0.411918
d16e59a2b33a		0.479944	No_DR	No_DR	No_DR	1	0	0.479944
d18f6431ebce		0.57473	No_DR	No_DR	No_DR	1	0	0.57473
d1a60c3b9fe5		0.469952	No_DR	No_DR	No_DR	1	0	0.469952
d1afdb8cf70d		0.554976	No_DR	No_DR	No_DR	1	0	0.554976
d1b279cc02ae		0.473109	No_DR	No_DR	No_DR	1	0	0.473109
d1ca85af57c9		0.580778	No_DR	No_DR	No_DR	1	0	0.580778
d1cf31577a59		0.120481	No_DR	No_DR	No_DR	1	0	0.120481
d1f7ea924a01		0.343335	No_DR	No_DR	No_DR	1	0	0.343335
d1fa0f744620		0.424477	No_DR	No_DR	No_DR	1	0	0.424477
d26bb2ed6e71		0.41498	No_DR	No_DR	No_DR	1	0	0.41498
d26bc6e1230d		0.591549	No_DR	No_DR	No_DR	1	0	0.591549
d27ac9e54901		0.667971	No_DR	No_DR	No_DR	1	0	0.667971
d29b37d110f3		0.373264	No_DR	No_DR	No_DR	1	0	0.373264
d2afca74cbc3		0.241041	No_DR	No_DR	No_DR	1	0	0.241041
d2c5fb82fe5f		0.509941	No_DR	No_DR	No_DR	1	0	0.509941
d2cd47ed2c1d		0.489624	No_DR	No_DR	No_DR	1	0	0.489624
d2d523e9f669		0.388883	No_DR	No_DR	No_DR	1	0	0.388883
d2dc86021c67		0.563853	No_DR	No_DR	No_DR	1	0	0.563853
d2fb715b0c41		0.437037	No_DR	No_DR	No_DR	1	0	0.437037
d30d079e6f9a		0.666862	No_DR	No_DR	No_DR	1	0	0.666862
d332d7b8a26e		0.619329	No_DR	No_DR	No_DR	1	0	0.619329
d38cf0f4a9af		0.619258	No_DR	No_DR	No_DR	1	0	0.619258
d39752cb6e57		0.520938	No_DR	No_DR	No_DR	1	0	0.520938
d3dfd0a2dee6		0.277908	No_DR	No_DR	No_DR	1	0	0.277908
d3e56584a481		0.307692	No_DR	No_DR	No_DR	1	0	0.307692
d436c06f0490		0.733477	No_DR	No_DR	No_DR	1	0	0.733477
d4583e9525dc		0.201811	No_DR	No_DR	No_DR	1	0	0.201811
d4bc001f7224		0.288537	No_DR	No_DR	No_DR	1	0	0.288537
d516f77d4516		0.471711	No_DR	No_DR	No_DR	1	0	0.471711
d51c2153d151		0.239157	No_DR	No_DR	No_DR	1	0	0.239157
d51e5d7484ea		0.561172	No_DR	No_DR	No_DR	1	0	0.561172
d56d32a1d62d		0.444757	No_DR	No_DR	No_DR	1	0	0.444757
d57d1be1bbd1		0.212262	No_DR	No_DR	No_DR	1	0	0.212262
d5ad3362424c		0.159281	No_DR	No_DR	No_DR	1	0	0.159281
d5c63a8d9e94		0.627288	No_DR	No_DR	No_DR	1	0	0.627288
d6130f2ec903		0.755492	No_DR	No_DR	No_DR	1	0	0.755492
d667af5742f6		0.63081	No_DR	No_DR	No_DR	1	0	0.63081
d6803e467592		0.504378	No_DR	No_DR	No_DR	1	0	0.504378
d69698f838db		0.523966	No_DR	No_DR	No_DR	1	0	0.523966
d6b109c82067		0.600347	No_DR	No_DR	No_DR	1	0	0.600347
d6dbb0820ea5		0.636523	No_DR	No_DR	No_DR	1	0	0.636523
d6df4fe492ec		0.493096	No_DR	No_DR	No_DR	1	0	0.493096
d6f36ec5564a		0.429341	No_DR	No_DR	No_DR	1	0	0.429341
d6f6bdfd8011		0.412396	No_DR	No_DR	No_DR	1	0	0.412396
d7078e8b0349		0.352883	No_DR	No_DR	No_DR	1	0	0.352883
d74ccc796517		0.649016	No_DR	No_DR	No_DR	1	0	0.649016
d774692d9919		0.619477	No_DR	No_DR	No_DR	1	0	0.619477
d78b7401096f		0	No_DR	No_DR	No_DR	1	0	0
d7a01fca9838		0.471839	No_DR	No_DR	No_DR	1	0	0.471839
d7ab5c040294		0.332849	No_DR	No_DR	No_DR	1	0	0.332849
d7ac4a0c9760		0.619178	No_DR	No_DR	No_DR	1	0	0.619178
d7bc00091cfc		0.546811	No_DR	No_DR	No_DR	1	0	0.546811
d7bc62d60e8c		0.203124	No_DR	No_DR	No_DR	1	0	0.203124
d7e5fe5245e0		0.519477	No_DR	No_DR	Mild	0	1	-0.480523
d807c53c1399		0.44903	No_DR	No_DR	No_DR	1	0	0.44903
d838d5b9f571		0.619914	No_DR	No_DR	No_DR	1	0	0.619914
d844a7252f4e		0.290759	No_DR	No_DR	No_DR	1	0	0.290759
d865997a6280		0.349239	No_DR	No_DR	No_DR	1	0	0.349239
d866c26d76f0		0.404593	No_DR	No_DR	No_DR	1	0	0.404593
d871895742b1		0.079776	No_DR	No_DR	No_DR	1	0	0.079776
d881c04f01fe		0.654017	No_DR	No_DR	No_DR	1	0	0.654017
d88c4843aec3		0.56487	No_DR	No_DR	No_DR	1	0	0.56487
d8da9de62743		0.531924	No_DR	No_DR	No_DR	1	0	0.531924
d911dd40c63b		0.659109	No_DR	No_DR	No_DR	1	0	0.659109
d91635f380b4		0.205223	No_DR	No_DR	No_DR	1	0	0.205223
d93b61dc8f64		0.057431	No_DR	Moderate	No_DR	0	1	-0.942569
d97911a32918		0.545094	No_DR	No_DR	No_DR	1	0	0.545094
d99b0f7dd9b9		0.664199	No_DR	No_DR	No_DR	1	0	0.664199
d99dd99be001		0.572844	No_DR	No_DR	No_DR	1	0	0.572844
d9ad2a0ec026		0.520211	No_DR	No_DR	No_DR	1	0	0.520211
d9c9b9786da3		0.495682	No_DR	No_DR	No_DR	1	0	0.495682
d9d2631f043c		0.444609	No_DR	No_DR	No_DR	1	0	0.444609
d9e58e4d8689		0.288955	No_DR	Moderate	Mild	0	1	-0.711045
da0a83f074f3		0.38805	No_DR	No_DR	No_DR	1	0	0.38805
da2bdf4236ac		0.561379	No_DR	No_DR	No_DR	1	0	0.561379
da3a2275c850		0.665598	No_DR	No_DR	No_DR	1	0	0.665598
da6389d129aa		0.211744	No_DR	Moderate	Moderate	1	1	-0.788256
da6bbb76d562		0.33801	No_DR	No_DR	No_DR	1	0	0.33801
da9262d9f5d9		0.590577	No_DR	No_DR	No_DR	1	0	0.590577
da949aa67a4f		0.523264	No_DR	No_DR	No_DR	1	0	0.523264
da9574d35b82		0.020735	No_DR	No_DR	No_DR	1	0	0.020735
da9fe02dead3		0.664834	No_DR	No_DR	No_DR	1	0	0.664834
daad7b617f21		0.456876	No_DR	No_DR	No_DR	1	0	0.456876
daff5427c9b2		0.378589	No_DR	No_DR	No_DR	1	0	0.378589
db3cd58aa315		0.385366	No_DR	No_DR	No_DR	1	0	0.385366
db52626d450c		0.536879	No_DR	No_DR	No_DR	1	0	0.536879
db6207e62c7b		0.384551	No_DR	No_DR	No_DR	1	0	0.384551
dc0eea0b68a7		0.348111	No_DR	No_DR	No_DR	1	0	0.348111
dc0f6e5b489b		0.534927	No_DR	No_DR	No_DR	1	0	0.534927
dcc6c0ad5cad		0.314862	No_DR	No_DR	No_DR	1	0	0.314862
dccdf750c962		0.522981	No_DR	No_DR	No_DR	1	0	0.522981
dce73d90c00c		0.711868	No_DR	No_DR	No_DR	1	0	0.711868
dcf109df1a2b		0.366856	No_DR	No_DR	No_DR	1	0	0.366856
dd02d60bef14		0.325205	No_DR	No_DR	No_DR	1	0	0.325205
dd285d9e97fe		0.663868	No_DR	No_DR	No_DR	1	0	0.663868
dd3176bacfe2		0.632875	No_DR	No_DR	No_DR	1	0	0.632875
dd90c321d7bc		0.354012	No_DR	No_DR	No_DR	1	0	0.354012
ddb222ff7c1d		0.355547	No_DR	No_DR	No_DR	1	0	0.355547
de18071c36e6		0.368447	No_DR	No_DR	No_DR	1	0	0.368447
de2eb5c8aa83		0.330666	No_DR	No_DR	No_DR	1	0	0.330666
de38adaae009		0.331205	No_DR	No_DR	No_DR	1	0	0.331205
de4cdabbce6d		0.424604	No_DR	No_DR	No_DR	1	0	0.424604
de55ed25e0e8		0.505828	No_DR	No_DR	No_DR	1	0	0.505828
de57c9e9fa93		0.120764	No_DR	No_DR	No_DR	1	0	0.120764
de6210f88536		0.601023	No_DR	No_DR	No_DR	1	0	0.601023
de730033c683		0.198937	No_DR	No_DR	No_DR	1	0	0.198937
dea7538bb91a		0.21841	No_DR	No_DR	No_DR	1	0	0.21841
dec5595e6154		0.436386	No_DR	No_DR	No_DR	1	0	0.436386
dee1031a76ae		0.134995	No_DR	No_DR	No_DR	1	0	0.134995
dee31065f8fe		0.695452	No_DR	No_DR	No_DR	1	0	0.695452
df0886f1e76b		0.369055	No_DR	No_DR	No_DR	1	0	0.369055
df6d13d04da1		0.682098	No_DR	No_DR	No_DR	1	0	0.682098
df9cb3729eb1		0.50757	No_DR	No_DR	No_DR	1	0	0.50757
dfc7ec7db0e0		0.551135	No_DR	No_DR	No_DR	1	0	0.551135
dfea19863428		0.167461	No_DR	No_DR	No_DR	1	0	0.167461
e01b7bac822b		0.666597	No_DR	No_DR	No_DR	1	0	0.666597
e0313be77035		0.418667	No_DR	No_DR	No_DR	1	0	0.418667
e03a74e7d74f		0.407793	No_DR	No_DR	No_DR	1	0	0.407793
e04f3c6619a3		0.485996	No_DR	No_DR	No_DR	1	0	0.485996
e067b06fd655		0.736747	No_DR	No_DR	No_DR	1	0	0.736747
e06cccc08c59		0.657154	No_DR	No_DR	No_DR	1	0	0.657154
e087bd4b88f2		0.359203	No_DR	No_DR	No_DR	1	0	0.359203
e0d229db881a		0.502565	No_DR	No_DR	No_DR	1	0	0.502565
e12df54e0d1e		0.533308	No_DR	No_DR	No_DR	1	0	0.533308
e12f9f19d1be		0.472132	No_DR	No_DR	No_DR	1	0	0.472132
e135d7ba9a0e		0.532703	No_DR	No_DR	No_DR	1	0	0.532703
e160a3b19911		0.368439	No_DR	No_DR	No_DR	1	0	0.368439
e16af45285e5		0.355176	No_DR	No_DR	No_DR	1	0	0.355176
e1ab92228e60		0.395837	No_DR	Mild	No_DR	0	1	-0.604163
e1b8acb1cea1		0.545237	No_DR	No_DR	No_DR	1	0	0.545237
e1c02f6c3362		0.440151	No_DR	No_DR	No_DR	1	0	0.440151
e1dc02a3dc2a		0.576994	No_DR	No_DR	No_DR	1	0	0.576994
e2265c383348		0.383704	No_DR	No_DR	No_DR	1	0	0.383704
e246cd89e1cc		0.634361	No_DR	No_DR	No_DR	1	0	0.634361
e251bdf05b85		0.435122	No_DR	No_DR	No_DR	1	0	0.435122
e26bcae6c67b		0.403768	No_DR	No_DR	No_DR	1	0	0.403768
e29e54ff921e		0.579126	No_DR	No_DR	No_DR	1	0	0.579126
e2c39ed0c941		0.754114	No_DR	No_DR	No_DR	1	0	0.754114
e2c3b037413b		0.440859	No_DR	Mild	No_DR	0	1	-0.559141
e2ec22b3d07e		0.197865	No_DR	No_DR	No_DR	1	0	0.197865
e30a890600e1		0.543151	No_DR	No_DR	No_DR	1	0	0.543151
e322acd46152		0.209076	No_DR	No_DR	No_DR	1	0	0.209076
e33766353db2		0.267195	No_DR	No_DR	No_DR	1	0	0.267195
e3b47ed5b511		0.644688	No_DR	No_DR	No_DR	1	0	0.644688
e3cd96cb094c		0.349985	No_DR	No_DR	No_DR	1	0	0.349985
e42d9a94a66d		0.421766	No_DR	No_DR	No_DR	1	0	0.421766
e47452069ea1		0.450824	No_DR	No_DR	No_DR	1	0	0.450824
e47770a2e5d1		0.113336	No_DR	No_DR	No_DR	1	0	0.113336
e4a44f9158dc		0.639514	No_DR	No_DR	No_DR	1	0	0.639514
e4ae1ee6aada		0.634591	No_DR	No_DR	No_DR	1	0	0.634591
e4b0df29b96f		0.527453	No_DR	No_DR	No_DR	1	0	0.527453
e4c799738a19		0.46274	No_DR	No_DR	No_DR	1	0	0.46274
e4d3d437b0a8		0.591238	No_DR	No_DR	No_DR	1	0	0.591238
e4dcca36ceb4		0.569921	No_DR	No_DR	No_DR	1	0	0.569921
e50b0174690d		0.637907	No_DR	No_DR	No_DR	1	0	0.637907
e5197d77ec68		0.321829	No_DR	No_DR	No_DR	1	0	0.321829
e529c5757d64		0.386499	No_DR	No_DR	No_DR	1	0	0.386499
e582e56e7942		0.611514	No_DR	No_DR	No_DR	1	0	0.611514
e594c19e2e1d		0.572166	No_DR	No_DR	No_DR	1	0	0.572166
e59c5f345bb0		0.578393	No_DR	No_DR	No_DR	1	0	0.578393
e5de79795c1d		0.524919	No_DR	No_DR	No_DR	1	0	0.524919
e5f332efcbc7		0.122235	No_DR	No_DR	No_DR	1	0	0.122235
e5f73f2855c0		0.707025	No_DR	No_DR	No_DR	1	0	0.707025
e60e4edb3ca9		0.603005	No_DR	No_DR	No_DR	1	0	0.603005
e632e38fd2d4		0.392144	No_DR	No_DR	No_DR	1	0	0.392144
e6552b7432b3		0.64916	No_DR	No_DR	No_DR	1	0	0.64916
e66855a5c583		0.534283	No_DR	No_DR	No_DR	1	0	0.534283
e66ad813a508		0.565177	No_DR	No_DR	No_DR	1	0	0.565177
e68746d426b2		0.508754	No_DR	No_DR	No_DR	1	0	0.508754
e68bdd36e589		0.112813	No_DR	No_DR	No_DR	1	0	0.112813
e69b48516577		0.133425	No_DR	No_DR	No_DR	1	0	0.133425
e6a5e4718873		0.628506	No_DR	No_DR	No_DR	1	0	0.628506
e7291472109b		0.432842	No_DR	No_DR	No_DR	1	0	0.432842
e7578d8dba72		0.308702	No_DR	No_DR	No_DR	1	0	0.308702
e77a93c3d9a9		0.079747	No_DR	No_DR	No_DR	1	0	0.079747
e79e10907295		0.479662	No_DR	No_DR	No_DR	1	0	0.479662
e7b5dd5bab1f		0.44541	No_DR	No_DR	No_DR	1	0	0.44541
e81f4a2fbbdc		0.152303	No_DR	No_DR	No_DR	1	0	0.152303
e82232a3c28b		0.572175	No_DR	No_DR	No_DR	1	0	0.572175
e893e86dde94		0.614751	No_DR	No_DR	No_DR	1	0	0.614751
e8ddfc9709ce		0.711349	No_DR	No_DR	No_DR	1	0	0.711349
e8e44b3160e3		0.67774	No_DR	No_DR	No_DR	1	0	0.67774
e907d23cce3d		0.278777	No_DR	No_DR	No_DR	1	0	0.278777
e933923aab15		0.52331	No_DR	No_DR	No_DR	1	0	0.52331
e966850247f4		0.543931	No_DR	No_DR	No_DR	1	0	0.543931
e9678824215d		0.526343	No_DR	No_DR	No_DR	1	0	0.526343
e97ecf4355cb		0.539742	No_DR	No_DR	No_DR	1	0	0.539742
e9ce5bf645ab		0.717737	No_DR	No_DR	No_DR	1	0	0.717737
e9f3c85a2a02		0.427592	No_DR	No_DR	No_DR	1	0	0.427592
e9faf0296643		0.285723	No_DR	No_DR	No_DR	1	0	0.285723
ea4ce9516144		0.412445	No_DR	No_DR	No_DR	1	0	0.412445
ea5c42a78979		0.539416	No_DR	No_DR	No_DR	1	0	0.539416
ea68b58a6e8f		0.631298	No_DR	No_DR	No_DR	1	0	0.631298
ea6a53e54d0f		0.314227	No_DR	No_DR	No_DR	1	0	0.314227
ea7e21bab610		0.550454	No_DR	No_DR	No_DR	1	0	0.550454
ea9c41e1ced0		0.640651	No_DR	No_DR	No_DR	1	0	0.640651
eabc7c716255		0.516491	No_DR	No_DR	No_DR	1	0	0.516491
eabf421f94d0		0.617729	No_DR	No_DR	No_DR	1	0	0.617729
eae70f527755		0.721637	No_DR	No_DR	No_DR	1	0	0.721637
eb050765b323		0.586854	No_DR	No_DR	No_DR	1	0	0.586854
eb175669d789		0.410096	No_DR	No_DR	No_DR	1	0	0.410096
eb6b1f1c09db		0.37799	No_DR	Moderate	Moderate	1	1	-0.62201
ebd96d853918		0.680915	No_DR	No_DR	No_DR	1	0	0.680915
ebf4b22240f4		0.68002	No_DR	No_DR	No_DR	1	0	0.68002
ec01f0862669		0.564435	No_DR	No_DR	No_DR	1	0	0.564435
ec0c9f817b03		0.624189	No_DR	No_DR	No_DR	1	0	0.624189
ec363f48867b		0.195378	No_DR	No_DR	No_DR	1	0	0.195378
ec57cc20d776		0.352911	No_DR	No_DR	No_DR	1	0	0.352911
ec6659926105		0.552483	No_DR	No_DR	No_DR	1	0	0.552483
ec6f1797a25a		0.47185	No_DR	No_DR	No_DR	1	0	0.47185
ecad6845f630		0.062102	No_DR	No_DR	No_DR	1	0	0.062102
ecb4500285ed		0.519544	No_DR	No_DR	No_DR	1	0	0.519544
ed2c52c14493		0.46028	No_DR	No_DR	No_DR	1	0	0.46028
ed2ef440d22c		0.439159	No_DR	No_DR	No_DR	1	0	0.439159
ed3ce1674761		0.530736	No_DR	No_DR	No_DR	1	0	0.530736
ed648b9bcd95		0.484441	No_DR	No_DR	No_DR	1	0	0.484441
ed6bd9293a89		0.566391	No_DR	No_DR	No_DR	1	0	0.566391
eda1d75cbcf0		0.522551	No_DR	No_DR	No_DR	1	0	0.522551
eda29a9d78f3		0.556832	No_DR	No_DR	No_DR	1	0	0.556832
edceb0657d77		0.285584	No_DR	No_DR	No_DR	1	0	0.285584
ee36ca728641		0.405848	No_DR	No_DR	No_DR	1	0	0.405848
ee3f5cf52188		0.547392	No_DR	No_DR	No_DR	1	0	0.547392
ee3fe7809e6a		0.630783	No_DR	No_DR	No_DR	1	0	0.630783
ee77763a6afb		0.459507	No_DR	No_DR	No_DR	1	0	0.459507
eeaea2c5ff34		0.377759	No_DR	No_DR	No_DR	1	0	0.377759
eebd1e195952		0.338212	No_DR	No_DR	No_DR	1	0	0.338212
eedae6b28f96		0.218251	No_DR	No_DR	No_DR	1	0	0.218251
ef247f28004f		0.436977	No_DR	No_DR	No_DR	1	0	0.436977
ef4121e9bb67		0.633085	No_DR	No_DR	No_DR	1	0	0.633085
ef476be214d4		0.310453	No_DR	No_DR	No_DR	1	0	0.310453
ef48780f5d5f		0.54302	No_DR	No_DR	No_DR	1	0	0.54302
ef5155990874		0.744258	No_DR	No_DR	No_DR	1	0	0.744258
ef7eb85b75fc		0.662095	No_DR	No_DR	No_DR	1	0	0.662095
ef81cd8854cb		0.587063	No_DR	No_DR	No_DR	1	0	0.587063
ef8c39eb9157		0.415892	No_DR	No_DR	No_DR	1	0	0.415892
ef99c499d665		0.555091	No_DR	No_DR	No_DR	1	0	0.555091
f002ce614c59		0.438724	No_DR	No_DR	No_DR	1	0	0.438724
f00ce9b9d6f4		0.526135	No_DR	No_DR	No_DR	1	0	0.526135
f02057c41256		0.115936	No_DR	No_DR	No_DR	1	0	0.115936
f0267c42907c		0.481863	No_DR	No_DR	No_DR	1	0	0.481863
f02956bd7c50		0.39151	No_DR	No_DR	No_DR	1	0	0.39151
f02babb3a023		0.497655	No_DR	No_DR	No_DR	1	0	0.497655
f0546a45ef10		0.68711	No_DR	No_DR	No_DR	1	0	0.68711
f066db7a2efe		0.421239	No_DR	Mild	Mild	1	1	-0.578761
f06e7a9df795		0.340698	No_DR	No_DR	No_DR	1	0	0.340698
f0860c21533b		0	No_DR	No_DR	No_DR	1	0	0
f09cfc6a4dbd		0.578921	No_DR	No_DR	No_DR	1	0	0.578921
f09fd9433dff		0.50452	No_DR	No_DR	No_DR	1	0	0.50452
f0a2dc580009		0.313531	No_DR	No_DR	No_DR	1	0	0.313531
f0e1201b5c1f		0.393684	No_DR	No_DR	No_DR	1	0	0.393684
f1979147aad4		0.053037	No_DR	No_DR	No_DR	1	0	0.053037
f1d719c97838		0.528631	No_DR	No_DR	No_DR	1	0	0.528631
f233638e0e90		0.254498	No_DR	No_DR	No_DR	1	0	0.254498
f252046c0fe6		0.714761	No_DR	No_DR	No_DR	1	0	0.714761
f26b02ead915		0.465751	No_DR	No_DR	No_DR	1	0	0.465751
f298b7d05958		0.646451	No_DR	No_DR	No_DR	1	0	0.646451
f2c0b41acd05		0.270541	No_DR	No_DR	No_DR	1	0	0.270541
f2f569a64949		0.427366	No_DR	No_DR	No_DR	1	0	0.427366
f35d80bb1a22		0.640028	No_DR	No_DR	No_DR	1	0	0.640028
f361060eda3e		0.57016	No_DR	No_DR	No_DR	1	0	0.57016
f366fb1cc475		0.732376	No_DR	No_DR	No_DR	1	0	0.732376
f36cb007a1ef		0.629749	No_DR	No_DR	No_DR	1	0	0.629749
f3a4751af42e		0.626763	No_DR	No_DR	No_DR	1	0	0.626763
f3b27ac2d371		0.531243	No_DR	No_DR	No_DR	1	0	0.531243
f3bb996b45ce		0.658042	No_DR	No_DR	No_DR	1	0	0.658042
f42b693a9414		0.391156	No_DR	No_DR	No_DR	1	0	0.391156
f431f2e119d7		0.357669	No_DR	No_DR	No_DR	1	0	0.357669
f451eee2b66b		0.586715	No_DR	No_DR	No_DR	1	0	0.586715
f48241b0c995		0.44898	No_DR	No_DR	No_DR	1	0	0.44898
f4874247ede6		0.40147	No_DR	No_DR	No_DR	1	0	0.40147
f4c7ae514c54		0.492731	No_DR	No_DR	No_DR	1	0	0.492731
f4d3169b468a		0.516171	No_DR	No_DR	No_DR	1	0	0.516171
f4de9620e3f2		0.082013	No_DR	No_DR	No_DR	1	0	0.082013
f4df3d86688d		0.508604	No_DR	No_DR	No_DR	1	0	0.508604
f4e68b61f480		0.340015	No_DR	No_DR	No_DR	1	0	0.340015
f4ea2a2cfbb9		0.628371	No_DR	No_DR	No_DR	1	0	0.628371
f531232ecb55		0.661541	No_DR	No_DR	No_DR	1	0	0.661541
f56ff0440ed1		0.37301	No_DR	No_DR	No_DR	1	0	0.37301
f5733f77273d		0.603836	No_DR	No_DR	No_DR	1	0	0.603836
f57cf3b6f48e		0.459945	No_DR	No_DR	No_DR	1	0	0.459945
f580566e27f5		0.203684	No_DR	No_DR	No_DR	1	0	0.203684
f58cdfa968be		0.425953	No_DR	No_DR	No_DR	1	0	0.425953
f58f0b2fd718		0.582322	No_DR	No_DR	No_DR	1	0	0.582322
f5c953bee7cd		0.718645	No_DR	No_DR	No_DR	1	0	0.718645
f62b8a076833		0.360823	No_DR	No_DR	No_DR	1	0	0.360823
f633c474e8b8		0.742993	No_DR	No_DR	No_DR	1	0	0.742993
f64b6e85f1c9		0.615328	No_DR	No_DR	No_DR	1	0	0.615328
f66c4ee86629		0.407302	No_DR	No_DR	No_DR	1	0	0.407302
f68690db78d3		0.410412	No_DR	No_DR	No_DR	1	0	0.410412
f6d760566a51		0.623596	No_DR	No_DR	No_DR	1	0	0.623596
f7116e7b2f4e		0.506275	No_DR	No_DR	No_DR	1	0	0.506275
f71333204618		0.38005	No_DR	No_DR	No_DR	1	0	0.38005
f71aca5a7dc3		0.286363	No_DR	No_DR	No_DR	1	0	0.286363
f71bea807c96		0.460265	No_DR	No_DR	No_DR	1	0	0.460265
f7508f14dd7b		0.539132	No_DR	No_DR	No_DR	1	0	0.539132
f7735b6d47f7		0.534767	No_DR	No_DR	No_DR	1	0	0.534767
f7defe70afc3		0.38704	No_DR	No_DR	No_DR	1	0	0.38704
f7e9fa75c7c1		0.504842	No_DR	No_DR	No_DR	1	0	0.504842
f819c65b803c		0.185784	No_DR	No_DR	No_DR	1	0	0.185784
f85c78201a50		0.523902	No_DR	No_DR	No_DR	1	0	0.523902
f85fd4fac887		0.449864	No_DR	No_DR	No_DR	1	0	0.449864
f86d1c404acb		0.383566	No_DR	No_DR	No_DR	1	0	0.383566
f8d62557ad0c		0.11879	No_DR	No_DR	No_DR	1	0	0.11879
f8f5942b690e		0.377752	No_DR	No_DR	No_DR	1	0	0.377752
f90f8931a9bc		0.688188	No_DR	No_DR	No_DR	1	0	0.688188
f91cfa82b9d4		0.282882	No_DR	No_DR	No_DR	1	0	0.282882
f952ad2e4356		0.342556	No_DR	No_DR	No_DR	1	0	0.342556
f994a3b07935		0.693472	No_DR	No_DR	No_DR	1	0	0.693472
f9d52509c571		0.60811	No_DR	No_DR	No_DR	1	0	0.60811
f9d8ff3e6592		0.490136	No_DR	No_DR	No_DR	1	0	0.490136
f9e1c439d4c8		0.70557	No_DR	No_DR	No_DR	1	0	0.70557
fa0c87bd75ce		0.004992	No_DR	No_DR	No_DR	1	0	0.004992
fa573163dd8b		0.624693	No_DR	No_DR	No_DR	1	0	0.624693
fa6f3d8bb1d5		0.637092	No_DR	No_DR	No_DR	1	0	0.637092
fa7fa797c650		0.608989	No_DR	No_DR	No_DR	1	0	0.608989
fa9bece586fc		0.50516	No_DR	No_DR	No_DR	1	0	0.50516
fa9f1bc03f21		0.413717	No_DR	No_DR	No_DR	1	0	0.413717
fb1b8771c70a		0.548835	No_DR	No_DR	No_DR	1	0	0.548835
fb767cea406c		0.109517	No_DR	No_DR	No_DR	1	0	0.109517
fb88783de055		0.582946	No_DR	No_DR	No_DR	1	0	0.582946
fb88d23fc5fe		0.635754	No_DR	No_DR	No_DR	1	0	0.635754
fbcbc81cf9be		0.732015	No_DR	No_DR	No_DR	1	0	0.732015
fbdc796290d4		0.627509	No_DR	No_DR	No_DR	1	0	0.627509
fbfa925506f6		0.370217	No_DR	No_DR	No_DR	1	0	0.370217
fc782722a50c		0.561347	No_DR	No_DR	No_DR	1	0	0.561347
fc898dfeb24f		0.24123	No_DR	No_DR	No_DR	1	0	0.24123
fc8fce67fbf8		0.232065	No_DR	No_DR	No_DR	1	0	0.232065
fca1a8738b8a		0.707352	No_DR	No_DR	No_DR	1	0	0.707352
fcc32dffd24d		0.329197	No_DR	No_DR	No_DR	1	0	0.329197
fce73678f650		0.749577	No_DR	No_DR	No_DR	1	0	0.749577
fd079d2e93a2		0.511329	No_DR	No_DR	No_DR	1	0	0.511329
fd0a70082e7c		0.622672	No_DR	No_DR	No_DR	1	0	0.622672
fd4c946c52bf		0.555342	No_DR	No_DR	No_DR	1	0	0.555342
fd87b6b2e664		0.511825	No_DR	No_DR	No_DR	1	0	0.511825
fdbc252813b1		0.400243	No_DR	No_DR	No_DR	1	0	0.400243
fdc685055659		0.67641	No_DR	No_DR	No_DR	1	0	0.67641
fe06dad6851c		0.506435	No_DR	No_DR	No_DR	1	0	0.506435
fe0e2dee1834		0.36779	No_DR	No_DR	No_DR	1	0	0.36779
fe3b0e50be78		0.296246	No_DR	No_DR	No_DR	1	0	0.296246
fe3f62695b2d		0.551473	No_DR	No_DR	No_DR	1	0	0.551473
febfb20dc311		0.613538	No_DR	No_DR	No_DR	1	0	0.613538
fed5bb685832		0.563211	No_DR	No_DR	No_DR	1	0	0.563211
fefded6bf135		0.059729	No_DR	No_DR	No_DR	1	0	0.059729
ff03f74667df		0.452191	No_DR	No_DR	No_DR	1	0	0.452191
ff1e940105f9		0.60257	No_DR	No_DR	No_DR	1	0	0.60257
ff4832d55461		0.074555	No_DR	No_DR	No_DR	1	0	0.074555
ff4955e76894		0.172836	No_DR	Mild	Mild	1	1	-0.827164
ff4cd992667b		0.401031	No_DR	No_DR	No_DR	1	0	0.401031
ff59d44a70a7		0.616597	No_DR	No_DR	No_DR	1	0	0.616597
ff631653374e		0.516633	No_DR	No_DR	No_DR	1	0	0.516633
ffc04fed30e6		0.386659	No_DR	No_DR	No_DR	1	0	0.386659
ffd97f8cd5aa		0.580806	No_DR	No_DR	No_DR	1	0	0.580806
						356	9	159.325

## Sheet: NODR_1_alexnet_inceptionresnetv
		Activation Maps Consensus		Network 1	Network 2
Immagine	Immagine	Gradcam-Consensus	True_Label	Alexnet_Scratch	Densenet_Scratch	Predict_Consensus	Penalty	Trustability
cfb17a7cc8d4		0.000226	No_DR	No_DR	No_DR	1	0	0.000226
cfdbaef73a8b		0.000164	No_DR	No_DR	No_DR	1	0	0.000164
cfed7c1172ec		0.000228	No_DR	No_DR	No_DR	1	0	0.000228
cff262ed8f4c		8.9e-05	No_DR	No_DR	No_DR	1	0	8.9e-05
cffc50047828		0.000676	No_DR	No_DR	No_DR	1	0	0.000676
d02b79fc3200		0.000246	No_DR	No_DR	No_DR	1	0	0.000246
d0926ed2c8e5		0.000213	No_DR	No_DR	No_DR	1	0	0.000213
d160ebef4117		0.000273	No_DR	No_DR	No_DR	1	0	0.000273
d16e39b9d6f0		0.000719	No_DR	No_DR	No_DR	1	0	0.000719
d16e59a2b33a		0.000195	No_DR	No_DR	No_DR	1	0	0.000195
d18f6431ebce		0.000228	No_DR	No_DR	No_DR	1	0	0.000228
d1a60c3b9fe5		0.000302	No_DR	No_DR	No_DR	1	0	0.000302
d1afdb8cf70d		0.000225	No_DR	No_DR	No_DR	1	0	0.000225
d1b279cc02ae		0.000299	No_DR	No_DR	No_DR	1	0	0.000299
d1ca85af57c9		0.000203	No_DR	No_DR	No_DR	1	0	0.000203
d1cf31577a59		0.000112	No_DR	No_DR	No_DR	1	0	0.000112
d1f7ea924a01		0.0007	No_DR	No_DR	No_DR	1	0	0.0007
d1fa0f744620		0.000793	No_DR	No_DR	No_DR	1	0	0.000793
d26bb2ed6e71		0.000724	No_DR	No_DR	No_DR	1	0	0.000724
d26bc6e1230d		0.000166	No_DR	No_DR	No_DR	1	0	0.000166
d27ac9e54901		0.000207	No_DR	No_DR	No_DR	1	0	0.000207
d29b37d110f3		0.000685	No_DR	No_DR	No_DR	1	0	0.000685
d2afca74cbc3		0.000603	No_DR	No_DR	No_DR	1	0	0.000603
d2c5fb82fe5f		0.000553	No_DR	No_DR	No_DR	1	0	0.000553
d2cd47ed2c1d		0.000632	No_DR	No_DR	No_DR	1	0	0.000632
d2d523e9f669		0.000619	No_DR	No_DR	No_DR	1	0	0.000619
d2dc86021c67		0.000315	No_DR	No_DR	No_DR	1	0	0.000315
d2fb715b0c41		0.000289	No_DR	No_DR	No_DR	1	0	0.000289
d30d079e6f9a		0.000326	No_DR	No_DR	No_DR	1	0	0.000326
d332d7b8a26e		0.000134	No_DR	No_DR	No_DR	1	0	0.000134
d38cf0f4a9af		0.000243	No_DR	No_DR	No_DR	1	0	0.000243
d39752cb6e57		0.000188	No_DR	No_DR	No_DR	1	0	0.000188
d3dfd0a2dee6		0.000482	No_DR	No_DR	No_DR	1	0	0.000482
d3e56584a481		0.000797	No_DR	No_DR	No_DR	1	0	0.000797
d436c06f0490		0.000196	No_DR	No_DR	No_DR	1	0	0.000196
d4583e9525dc		0.000886	No_DR	No_DR	No_DR	1	0	0.000886
d4bc001f7224		0.000759	No_DR	No_DR	No_DR	1	0	0.000759
d516f77d4516		0.000673	No_DR	No_DR	No_DR	1	0	0.000673
d51c2153d151		0.000258	No_DR	No_DR	Moderate	0	1	-0.999742
d51e5d7484ea		0.000181	No_DR	No_DR	No_DR	1	0	0.000181
d56d32a1d62d		0.000674	No_DR	No_DR	No_DR	1	0	0.000674
d57d1be1bbd1		6.7e-05	No_DR	No_DR	No_DR	1	0	6.7e-05
d5ad3362424c		0.0001	No_DR	No_DR	No_DR	1	0	0.0001
d5c63a8d9e94		0.000209	No_DR	No_DR	No_DR	1	0	0.000209
d6130f2ec903		0.000245	No_DR	No_DR	No_DR	1	0	0.000245
d667af5742f6		0.000217	No_DR	No_DR	No_DR	1	0	0.000217
d6803e467592		0.000214	No_DR	No_DR	No_DR	1	0	0.000214
d69698f838db		0.000222	No_DR	No_DR	No_DR	1	0	0.000222
d6b109c82067		0.000214	No_DR	No_DR	No_DR	1	0	0.000214
d6dbb0820ea5		0.000192	No_DR	No_DR	No_DR	1	0	0.000192
d6df4fe492ec		0.000241	No_DR	No_DR	No_DR	1	0	0.000241
d6f36ec5564a		0.000772	No_DR	No_DR	No_DR	1	0	0.000772
d6f6bdfd8011		0.000195	No_DR	No_DR	No_DR	1	0	0.000195
d7078e8b0349		0.0007	No_DR	No_DR	No_DR	1	0	0.0007
d74ccc796517		0.000285	No_DR	No_DR	No_DR	1	0	0.000285
d774692d9919		0.000158	No_DR	No_DR	No_DR	1	0	0.000158
d78b7401096f		9.4e-05	No_DR	No_DR	No_DR	1	0	9.4e-05
d7a01fca9838		0.000673	No_DR	No_DR	No_DR	1	0	0.000673
d7ab5c040294		0.000641	No_DR	No_DR	No_DR	1	0	0.000641
d7ac4a0c9760		0.000171	No_DR	No_DR	No_DR	1	0	0.000171
d7bc00091cfc		0.000219	No_DR	No_DR	No_DR	1	0	0.000219
d7bc62d60e8c		0.000101	No_DR	No_DR	Moderate	0	1	-0.999899
d7e5fe5245e0		0.000223	No_DR	No_DR	Mild	0	1	-0.999777
d807c53c1399		0.00022	No_DR	No_DR	No_DR	1	0	0.00022
d838d5b9f571		0.000292	No_DR	No_DR	No_DR	1	0	0.000292
d844a7252f4e		0.000133	No_DR	No_DR	Moderate	0	1	-0.999867
d865997a6280		0.000639	No_DR	No_DR	No_DR	1	0	0.000639
d866c26d76f0		0.000586	No_DR	No_DR	No_DR	1	0	0.000586
d871895742b1		0.00011	No_DR	No_DR	Moderate	0	1	-0.99989
d881c04f01fe		0.000306	No_DR	No_DR	No_DR	1	0	0.000306
d88c4843aec3		0.000221	No_DR	No_DR	No_DR	1	0	0.000221
d8da9de62743		0.000164	No_DR	No_DR	No_DR	1	0	0.000164
d911dd40c63b		0.000246	No_DR	No_DR	No_DR	1	0	0.000246
d91635f380b4		0.000789	No_DR	No_DR	No_DR	1	0	0.000789
d93b61dc8f64		8.2e-05	No_DR	Moderate	No_DR	0	1	-0.999918
d97911a32918		0.000202	No_DR	No_DR	No_DR	1	0	0.000202
d99b0f7dd9b9		0.000167	No_DR	No_DR	No_DR	1	0	0.000167
d99dd99be001		0.000239	No_DR	No_DR	No_DR	1	0	0.000239
d9ad2a0ec026		0.000236	No_DR	No_DR	No_DR	1	0	0.000236
d9c9b9786da3		0.000277	No_DR	No_DR	No_DR	1	0	0.000277
d9d2631f043c		6.9e-05	No_DR	No_DR	No_DR	1	0	6.9e-05
d9e58e4d8689		0.000171	No_DR	Moderate	Mild	0	1	-0.999829
da0a83f074f3		0.000721	No_DR	No_DR	No_DR	1	0	0.000721
da2bdf4236ac		0.000751	No_DR	No_DR	No_DR	1	0	0.000751
da3a2275c850		0.000295	No_DR	No_DR	No_DR	1	0	0.000295
da6389d129aa		0.000157	No_DR	Moderate	Moderate	1	1	-0.999843
da6bbb76d562		5.8e-05	No_DR	No_DR	Moderate	0	1	-0.999942
da9262d9f5d9		0.000162	No_DR	No_DR	No_DR	1	0	0.000162
da949aa67a4f		0.000469	No_DR	No_DR	No_DR	1	0	0.000469
da9574d35b82		9.1e-05	No_DR	No_DR	No_DR	1	0	9.1e-05
da9fe02dead3		0.000262	No_DR	No_DR	No_DR	1	0	0.000262
daad7b617f21		0.000344	No_DR	No_DR	No_DR	1	0	0.000344
daff5427c9b2		0.000688	No_DR	No_DR	No_DR	1	0	0.000688
db3cd58aa315		0.000688	No_DR	No_DR	No_DR	1	0	0.000688
db52626d450c		0.000288	No_DR	No_DR	No_DR	1	0	0.000288
db6207e62c7b		0.000687	No_DR	No_DR	No_DR	1	0	0.000687
dc0eea0b68a7		4.8e-05	No_DR	No_DR	No_DR	1	0	4.8e-05
dc0f6e5b489b		0.000721	No_DR	No_DR	No_DR	1	0	0.000721
dcc6c0ad5cad		0.000108	No_DR	No_DR	No_DR	1	0	0.000108
dccdf750c962		0.000199	No_DR	No_DR	No_DR	1	0	0.000199
dce73d90c00c		0.000209	No_DR	No_DR	No_DR	1	0	0.000209
dcf109df1a2b		0.000606	No_DR	No_DR	No_DR	1	0	0.000606
dd02d60bef14		0.000876	No_DR	No_DR	No_DR	1	0	0.000876
dd285d9e97fe		0.000178	No_DR	No_DR	No_DR	1	0	0.000178
dd3176bacfe2		0.000192	No_DR	No_DR	No_DR	1	0	0.000192
dd90c321d7bc		0.00056	No_DR	No_DR	No_DR	1	0	0.00056
ddb222ff7c1d		0.000781	No_DR	No_DR	No_DR	1	0	0.000781
de18071c36e6		0.000637	No_DR	No_DR	No_DR	1	0	0.000637
de2eb5c8aa83		0.000472	No_DR	No_DR	No_DR	1	0	0.000472
de38adaae009		7.1e-05	No_DR	No_DR	No_DR	1	0	7.1e-05
de4cdabbce6d		0.000542	No_DR	No_DR	No_DR	1	0	0.000542
de55ed25e0e8		0.000208	No_DR	No_DR	No_DR	1	0	0.000208
de57c9e9fa93		9.5e-05	No_DR	No_DR	No_DR	1	0	9.5e-05
de6210f88536		0.000247	No_DR	No_DR	No_DR	1	0	0.000247
de730033c683		0.000109	No_DR	No_DR	No_DR	1	0	0.000109
dea7538bb91a		0.000325	No_DR	No_DR	No_DR	1	0	0.000325
dec5595e6154		0.000274	No_DR	No_DR	No_DR	1	0	0.000274
dee1031a76ae		0.000224	No_DR	No_DR	No_DR	1	0	0.000224
dee31065f8fe		0.000201	No_DR	No_DR	No_DR	1	0	0.000201
df0886f1e76b		0.000942	No_DR	No_DR	No_DR	1	0	0.000942
df6d13d04da1		0.000141	No_DR	No_DR	No_DR	1	0	0.000141
df9cb3729eb1		0.000577	No_DR	No_DR	No_DR	1	0	0.000577
dfc7ec7db0e0		0.000324	No_DR	No_DR	No_DR	1	0	0.000324
dfea19863428		0.000388	No_DR	No_DR	No_DR	1	0	0.000388
e01b7bac822b		0.0003	No_DR	No_DR	No_DR	1	0	0.0003
e0313be77035		0.000536	No_DR	No_DR	No_DR	1	0	0.000536
e03a74e7d74f		0.000669	No_DR	No_DR	No_DR	1	0	0.000669
e04f3c6619a3		0.000275	No_DR	No_DR	No_DR	1	0	0.000275
e067b06fd655		0.000232	No_DR	No_DR	No_DR	1	0	0.000232
e06cccc08c59		0.000281	No_DR	No_DR	No_DR	1	0	0.000281
e087bd4b88f2		0.000522	No_DR	No_DR	No_DR	1	0	0.000522
e0d229db881a		0.000257	No_DR	No_DR	No_DR	1	0	0.000257
e12df54e0d1e		0.000271	No_DR	No_DR	No_DR	1	0	0.000271
e12f9f19d1be		0.000732	No_DR	No_DR	No_DR	1	0	0.000732
e135d7ba9a0e		0.000164	No_DR	No_DR	No_DR	1	0	0.000164
e160a3b19911		0.000653	No_DR	No_DR	No_DR	1	0	0.000653
e16af45285e5		0.000195	No_DR	No_DR	No_DR	1	0	0.000195
e1ab92228e60		0.000209	No_DR	Mild	Mild	1	1	-0.999791
e1b8acb1cea1		0.000231	No_DR	No_DR	No_DR	1	0	0.000231
e1c02f6c3362		0.000567	No_DR	No_DR	No_DR	1	0	0.000567
e1dc02a3dc2a		0.000175	No_DR	No_DR	No_DR	1	0	0.000175
e2265c383348		0.000667	No_DR	No_DR	No_DR	1	0	0.000667
e246cd89e1cc		0.000239	No_DR	No_DR	No_DR	1	0	0.000239
e251bdf05b85		0.000155	No_DR	No_DR	No_DR	1	0	0.000155
e26bcae6c67b		8.1e-05	No_DR	No_DR	No_DR	1	0	8.1e-05
e29e54ff921e		0.000175	No_DR	No_DR	No_DR	1	0	0.000175
e2c39ed0c941		0.000216	No_DR	No_DR	No_DR	1	0	0.000216
e2c3b037413b		0.000194	No_DR	Mild	Mild	1	1	-0.999806
e2ec22b3d07e		0.000242	No_DR	No_DR	No_DR	1	0	0.000242
e30a890600e1		0.000201	No_DR	No_DR	No_DR	1	0	0.000201
e322acd46152		0.000988	No_DR	No_DR	No_DR	1	0	0.000988
e33766353db2		0.000612	No_DR	No_DR	No_DR	1	0	0.000612
e3b47ed5b511		0.000226	No_DR	No_DR	No_DR	1	0	0.000226
e3cd96cb094c		0.000578	No_DR	No_DR	No_DR	1	0	0.000578
e42d9a94a66d		7.7e-05	No_DR	No_DR	No_DR	1	0	7.7e-05
e47452069ea1		0.000644	No_DR	No_DR	No_DR	1	0	0.000644
e47770a2e5d1		9.6e-05	No_DR	No_DR	No_DR	1	0	9.6e-05
e4a44f9158dc		0.000181	No_DR	No_DR	No_DR	1	0	0.000181
e4ae1ee6aada		0.000159	No_DR	No_DR	No_DR	1	0	0.000159
e4b0df29b96f		0.000192	No_DR	No_DR	No_DR	1	0	0.000192
e4c799738a19		0.000242	No_DR	No_DR	No_DR	1	0	0.000242
e4d3d437b0a8		0.000242	No_DR	No_DR	No_DR	1	0	0.000242
e4dcca36ceb4		0.000194	No_DR	No_DR	No_DR	1	0	0.000194
e50b0174690d		0.000234	No_DR	No_DR	No_DR	1	0	0.000234
e5197d77ec68		0.000162	No_DR	No_DR	No_DR	1	0	0.000162
e529c5757d64		0.000867	No_DR	No_DR	No_DR	1	0	0.000867
e582e56e7942		0.000248	No_DR	No_DR	No_DR	1	0	0.000248
e594c19e2e1d		0.000237	No_DR	No_DR	No_DR	1	0	0.000237
e59c5f345bb0		0.000192	No_DR	No_DR	No_DR	1	0	0.000192
e5de79795c1d		0.000266	No_DR	No_DR	No_DR	1	0	0.000266
e5f332efcbc7		0.000638	No_DR	No_DR	No_DR	1	0	0.000638
e5f73f2855c0		0.000253	No_DR	No_DR	No_DR	1	0	0.000253
e60e4edb3ca9		0.000285	No_DR	No_DR	No_DR	1	0	0.000285
e632e38fd2d4		7.1e-05	No_DR	No_DR	No_DR	1	0	7.1e-05
e6552b7432b3		0.000225	No_DR	No_DR	No_DR	1	0	0.000225
e66855a5c583		0.000253	No_DR	No_DR	No_DR	1	0	0.000253
e66ad813a508		0.000231	No_DR	No_DR	No_DR	1	0	0.000231
e68746d426b2		0.000282	No_DR	No_DR	No_DR	1	0	0.000282
e68bdd36e589		7.5e-05	No_DR	No_DR	No_DR	1	0	7.5e-05
e69b48516577		9e-05	No_DR	No_DR	No_DR	1	0	9e-05
e6a5e4718873		0.000168	No_DR	No_DR	No_DR	1	0	0.000168
e7291472109b		0.000236	No_DR	No_DR	No_DR	1	0	0.000236
e7578d8dba72		0.000667	No_DR	No_DR	No_DR	1	0	0.000667
e77a93c3d9a9		8.3e-05	No_DR	No_DR	No_DR	1	0	8.3e-05
e79e10907295		0.000279	No_DR	No_DR	No_DR	1	0	0.000279
e7b5dd5bab1f		0.000221	No_DR	No_DR	No_DR	1	0	0.000221
e81f4a2fbbdc		8.8e-05	No_DR	No_DR	No_DR	1	0	8.8e-05
e82232a3c28b		0.000193	No_DR	No_DR	No_DR	1	0	0.000193
e893e86dde94		0.000182	No_DR	No_DR	No_DR	1	0	0.000182
e8ddfc9709ce		0.000186	No_DR	No_DR	No_DR	1	0	0.000186
e8e44b3160e3		0.000241	No_DR	No_DR	No_DR	1	0	0.000241
e907d23cce3d		0.000732	No_DR	No_DR	No_DR	1	0	0.000732
e933923aab15		0.000171	No_DR	No_DR	No_DR	1	0	0.000171
e966850247f4		0.00031	No_DR	No_DR	No_DR	1	0	0.00031
e9678824215d		0.000233	No_DR	No_DR	No_DR	1	0	0.000233
e97ecf4355cb		0.000545	No_DR	No_DR	No_DR	1	0	0.000545
e9ce5bf645ab		0.000246	No_DR	No_DR	No_DR	1	0	0.000246
e9f3c85a2a02		0.000191	No_DR	No_DR	No_DR	1	0	0.000191
e9faf0296643		4.9e-05	No_DR	No_DR	No_DR	1	0	4.9e-05
ea4ce9516144		0.000853	No_DR	No_DR	No_DR	1	0	0.000853
ea5c42a78979		0.00022	No_DR	No_DR	No_DR	1	0	0.00022
ea68b58a6e8f		0.000193	No_DR	No_DR	No_DR	1	0	0.000193
ea6a53e54d0f		0.000207	No_DR	No_DR	Moderate	0	1	-0.999793
ea7e21bab610		0.000217	No_DR	No_DR	No_DR	1	0	0.000217
ea9c41e1ced0		0.000244	No_DR	No_DR	No_DR	1	0	0.000244
eabc7c716255		0.000221	No_DR	No_DR	No_DR	1	0	0.000221
eabf421f94d0		0.000212	No_DR	No_DR	No_DR	1	0	0.000212
eae70f527755		0.000159	No_DR	No_DR	No_DR	1	0	0.000159
eb050765b323		0.00026	No_DR	No_DR	No_DR	1	0	0.00026
eb175669d789		0.000293	No_DR	No_DR	No_DR	1	0	0.000293
eb6b1f1c09db		0.000128	No_DR	Moderate	Moderate	1	1	-0.999872
ebd96d853918		0.00021	No_DR	No_DR	No_DR	1	0	0.00021
ebf4b22240f4		0.000183	No_DR	No_DR	No_DR	1	0	0.000183
ec01f0862669		0.000214	No_DR	No_DR	No_DR	1	0	0.000214
ec0c9f817b03		0.000258	No_DR	No_DR	No_DR	1	0	0.000258
ec363f48867b		9.4e-05	No_DR	No_DR	No_DR	1	0	9.4e-05
ec57cc20d776		0.001153	No_DR	No_DR	No_DR	1	0	0.001153
ec6659926105		0.000216	No_DR	No_DR	No_DR	1	0	0.000216
ec6f1797a25a		0.000172	No_DR	No_DR	No_DR	1	0	0.000172
ecad6845f630		5.2e-05	No_DR	No_DR	No_DR	1	0	5.2e-05
ecb4500285ed		0.000629	No_DR	No_DR	No_DR	1	0	0.000629
ed2c52c14493		0.000258	No_DR	No_DR	No_DR	1	0	0.000258
ed2ef440d22c		0.000237	No_DR	No_DR	No_DR	1	0	0.000237
ed3ce1674761		0.000196	No_DR	No_DR	No_DR	1	0	0.000196
ed648b9bcd95		0.00031	No_DR	No_DR	No_DR	1	0	0.00031
ed6bd9293a89		0.000247	No_DR	No_DR	No_DR	1	0	0.000247
eda1d75cbcf0		0.000254	No_DR	No_DR	No_DR	1	0	0.000254
eda29a9d78f3		0.000314	No_DR	No_DR	No_DR	1	0	0.000314
edceb0657d77		0.000595	No_DR	No_DR	No_DR	1	0	0.000595
ee36ca728641		0.000888	No_DR	No_DR	No_DR	1	0	0.000888
ee3f5cf52188		0.000682	No_DR	No_DR	No_DR	1	0	0.000682
ee3fe7809e6a		0.000802	No_DR	No_DR	No_DR	1	0	0.000802
ee77763a6afb		0.000589	No_DR	No_DR	No_DR	1	0	0.000589
eeaea2c5ff34		0.000575	No_DR	No_DR	No_DR	1	0	0.000575
eebd1e195952		0.000764	No_DR	No_DR	No_DR	1	0	0.000764
eedae6b28f96		8.4e-05	No_DR	No_DR	No_DR	1	0	8.4e-05
ef247f28004f		0.000713	No_DR	No_DR	No_DR	1	0	0.000713
ef4121e9bb67		0.000226	No_DR	No_DR	No_DR	1	0	0.000226
ef476be214d4		0.000979	No_DR	No_DR	No_DR	1	0	0.000979
ef48780f5d5f		0.000242	No_DR	No_DR	No_DR	1	0	0.000242
ef5155990874		0.000171	No_DR	No_DR	No_DR	1	0	0.000171
ef7eb85b75fc		0.000219	No_DR	No_DR	No_DR	1	0	0.000219
ef81cd8854cb		0.000184	No_DR	No_DR	No_DR	1	0	0.000184
ef8c39eb9157		0.000547	No_DR	No_DR	No_DR	1	0	0.000547
ef99c499d665		0.000265	No_DR	No_DR	No_DR	1	0	0.000265
f002ce614c59		6.4e-05	No_DR	No_DR	Severe	0	1	-0.999936
f00ce9b9d6f4		0.000186	No_DR	No_DR	No_DR	1	0	0.000186
f02057c41256		8.5e-05	No_DR	No_DR	No_DR	1	0	8.5e-05
f0267c42907c		0.000682	No_DR	No_DR	No_DR	1	0	0.000682
f02956bd7c50		0.00078	No_DR	No_DR	No_DR	1	0	0.00078
f02babb3a023		0.000166	No_DR	No_DR	No_DR	1	0	0.000166
f0546a45ef10		0.000218	No_DR	No_DR	No_DR	1	0	0.000218
f066db7a2efe		0.000182	No_DR	Mild	Mild	1	1	-0.999818
f06e7a9df795		9e-05	No_DR	No_DR	No_DR	1	0	9e-05
f0860c21533b		0.000119	No_DR	No_DR	No_DR	1	0	0.000119
f09cfc6a4dbd		0.000139	No_DR	No_DR	No_DR	1	0	0.000139
f09fd9433dff		0.000206	No_DR	No_DR	No_DR	1	0	0.000206
f0a2dc580009		0.000632	No_DR	No_DR	No_DR	1	0	0.000632
f0e1201b5c1f		0.000618	No_DR	No_DR	No_DR	1	0	0.000618
f1979147aad4		0.000122	No_DR	No_DR	No_DR	1	0	0.000122
f1d719c97838		0.000207	No_DR	No_DR	No_DR	1	0	0.000207
f233638e0e90		0.000259	No_DR	No_DR	No_DR	1	0	0.000259
f252046c0fe6		0.000315	No_DR	No_DR	No_DR	1	0	0.000315
f26b02ead915		0.000686	No_DR	No_DR	No_DR	1	0	0.000686
f298b7d05958		0.000255	No_DR	No_DR	No_DR	1	0	0.000255
f2c0b41acd05		0.000855	No_DR	No_DR	No_DR	1	0	0.000855
f2f569a64949		0.000926	No_DR	No_DR	No_DR	1	0	0.000926
f35d80bb1a22		0.000252	No_DR	No_DR	No_DR	1	0	0.000252
f361060eda3e		0.000219	No_DR	No_DR	No_DR	1	0	0.000219
f366fb1cc475		0.000191	No_DR	No_DR	No_DR	1	0	0.000191
f36cb007a1ef		0.000197	No_DR	No_DR	No_DR	1	0	0.000197
f3a4751af42e		0.000277	No_DR	No_DR	No_DR	1	0	0.000277
f3b27ac2d371		0.000197	No_DR	No_DR	No_DR	1	0	0.000197
f3bb996b45ce		0.000214	No_DR	No_DR	No_DR	1	0	0.000214
f42b693a9414		0.000786	No_DR	No_DR	No_DR	1	0	0.000786
f431f2e119d7		0.000519	No_DR	No_DR	No_DR	1	0	0.000519
f451eee2b66b		0.0002	No_DR	No_DR	No_DR	1	0	0.0002
f48241b0c995		0.000412	No_DR	No_DR	No_DR	1	0	0.000412
f4874247ede6		0.000986	No_DR	No_DR	No_DR	1	0	0.000986
f4c7ae514c54		0.000701	No_DR	No_DR	No_DR	1	0	0.000701
f4d3169b468a		0.000174	No_DR	No_DR	No_DR	1	0	0.000174
f4de9620e3f2		7.7e-05	No_DR	No_DR	No_DR	1	0	7.7e-05
f4df3d86688d		0.000198	No_DR	No_DR	No_DR	1	0	0.000198
f4e68b61f480		7e-05	No_DR	No_DR	No_DR	1	0	7e-05
f4ea2a2cfbb9		0.000264	No_DR	No_DR	No_DR	1	0	0.000264
f531232ecb55		0.000319	No_DR	No_DR	No_DR	1	0	0.000319
f56ff0440ed1		6.3e-05	No_DR	No_DR	No_DR	1	0	6.3e-05
f5733f77273d		0.000211	No_DR	No_DR	No_DR	1	0	0.000211
f57cf3b6f48e		0.000628	No_DR	No_DR	No_DR	1	0	0.000628
f580566e27f5		0.000336	No_DR	No_DR	No_DR	1	0	0.000336
f58cdfa968be		0.000744	No_DR	No_DR	No_DR	1	0	0.000744
f58f0b2fd718		0.000231	No_DR	No_DR	No_DR	1	0	0.000231
f5c953bee7cd		0.000234	No_DR	No_DR	No_DR	1	0	0.000234
f62b8a076833		0.000913	No_DR	No_DR	No_DR	1	0	0.000913
f633c474e8b8		0.000214	No_DR	No_DR	No_DR	1	0	0.000214
f64b6e85f1c9		0.000162	No_DR	No_DR	No_DR	1	0	0.000162
f66c4ee86629		9.9e-05	No_DR	No_DR	No_DR	1	0	9.9e-05
f68690db78d3		0.00061	No_DR	No_DR	No_DR	1	0	0.00061
f6d760566a51		0.000233	No_DR	No_DR	No_DR	1	0	0.000233
f7116e7b2f4e		0.000253	No_DR	No_DR	No_DR	1	0	0.000253
f71333204618		9.6e-05	No_DR	No_DR	No_DR	1	0	9.6e-05
f71aca5a7dc3		0.000681	No_DR	No_DR	No_DR	1	0	0.000681
f71bea807c96		0.000244	No_DR	No_DR	No_DR	1	0	0.000244
f7508f14dd7b		0.000826	No_DR	No_DR	No_DR	1	0	0.000826
f7735b6d47f7		0.000164	No_DR	No_DR	No_DR	1	0	0.000164
f7defe70afc3		9.9e-05	No_DR	No_DR	No_DR	1	0	9.9e-05
f7e9fa75c7c1		0.000214	No_DR	No_DR	No_DR	1	0	0.000214
f819c65b803c		0.001375	No_DR	No_DR	No_DR	1	0	0.001375
f85c78201a50		0.000259	No_DR	No_DR	No_DR	1	0	0.000259
f85fd4fac887		5.9e-05	No_DR	No_DR	No_DR	1	0	5.9e-05
f86d1c404acb		0.00083	No_DR	No_DR	No_DR	1	0	0.00083
f8d62557ad0c		0.000214	No_DR	No_DR	No_DR	1	0	0.000214
f8f5942b690e		0.000349	No_DR	No_DR	No_DR	1	0	0.000349
f90f8931a9bc		0.000158	No_DR	No_DR	No_DR	1	0	0.000158
f91cfa82b9d4		0.000603	No_DR	No_DR	No_DR	1	0	0.000603
f952ad2e4356		0.00064	No_DR	No_DR	No_DR	1	0	0.00064
f994a3b07935		0.000195	No_DR	No_DR	No_DR	1	0	0.000195
f9d52509c571		0.000293	No_DR	No_DR	No_DR	1	0	0.000293
f9d8ff3e6592		0.000651	No_DR	No_DR	No_DR	1	0	0.000651
f9e1c439d4c8		0.000138	No_DR	No_DR	No_DR	1	0	0.000138
fa0c87bd75ce		0.00021	No_DR	No_DR	No_DR	1	0	0.00021
fa573163dd8b		0.000191	No_DR	No_DR	No_DR	1	0	0.000191
fa6f3d8bb1d5		0.000199	No_DR	No_DR	No_DR	1	0	0.000199
fa7fa797c650		0.000184	No_DR	No_DR	No_DR	1	0	0.000184
fa9bece586fc		7.2e-05	No_DR	No_DR	No_DR	1	0	7.2e-05
fa9f1bc03f21		0.00029	No_DR	No_DR	No_DR	1	0	0.00029
fb1b8771c70a		0.000214	No_DR	No_DR	No_DR	1	0	0.000214
fb767cea406c		0.000308	No_DR	No_DR	No_DR	1	0	0.000308
fb88783de055		0.000191	No_DR	No_DR	No_DR	1	0	0.000191
fb88d23fc5fe		0.00034	No_DR	No_DR	No_DR	1	0	0.00034
fbcbc81cf9be		0.000229	No_DR	No_DR	No_DR	1	0	0.000229
fbdc796290d4		0.00032	No_DR	No_DR	No_DR	1	0	0.00032
fbfa925506f6		0.000943	No_DR	No_DR	No_DR	1	0	0.000943
fc782722a50c		0.000249	No_DR	No_DR	No_DR	1	0	0.000249
fc898dfeb24f		0.001008	No_DR	No_DR	No_DR	1	0	0.001008
fc8fce67fbf8		0.001088	No_DR	No_DR	No_DR	1	0	0.001088
fca1a8738b8a		0.0002	No_DR	No_DR	No_DR	1	0	0.0002
fcc32dffd24d		6.1e-05	No_DR	No_DR	No_DR	1	0	6.1e-05
fce73678f650		0.000245	No_DR	No_DR	No_DR	1	0	0.000245
fd079d2e93a2		0.000207	No_DR	No_DR	No_DR	1	0	0.000207
fd0a70082e7c		0.000251	No_DR	No_DR	No_DR	1	0	0.000251
fd4c946c52bf		0.000348	No_DR	No_DR	No_DR	1	0	0.000348
fd87b6b2e664		0.000181	No_DR	No_DR	No_DR	1	0	0.000181
fdbc252813b1		0.000667	No_DR	No_DR	No_DR	1	0	0.000667
fdc685055659		0.00019	No_DR	No_DR	No_DR	1	0	0.00019
fe06dad6851c		0.00091	No_DR	No_DR	No_DR	1	0	0.00091
fe0e2dee1834		0.000635	No_DR	No_DR	No_DR	1	0	0.000635
fe3b0e50be78		0.000152	No_DR	No_DR	No_DR	1	0	0.000152
fe3f62695b2d		0.000216	No_DR	No_DR	No_DR	1	0	0.000216
febfb20dc311		0.00015	No_DR	No_DR	No_DR	1	0	0.00015
fed5bb685832		0.000185	No_DR	No_DR	No_DR	1	0	0.000185
fefded6bf135		0.000118	No_DR	No_DR	No_DR	1	0	0.000118
ff03f74667df		0.000653	No_DR	No_DR	No_DR	1	0	0.000653
ff1e940105f9		0.000236	No_DR	No_DR	No_DR	1	0	0.000236
ff4832d55461		0.00067	No_DR	No_DR	No_DR	1	0	0.00067
ff4955e76894		0.000173	No_DR	Mild	Mild	1	1	-0.999827
ff4cd992667b		9.4e-05	No_DR	No_DR	No_DR	1	0	9.4e-05
ff59d44a70a7		0.000163	No_DR	No_DR	No_DR	1	0	0.000163
ff631653374e		0.000214	No_DR	No_DR	No_DR	1	0	0.000214
ffc04fed30e6		0.000735	No_DR	No_DR	No_DR	1	0	0.000735
ffd97f8cd5aa		0.000182	No_DR	No_DR	No_DR	1	0	0.000182
						351	16	-15.8761

## Sheet: NODR_1_alexnet_inceptionv3
		Activation Maps Consensus		Network 1	Network 2
Immagine	Immagine	Gradcam-Consensus	True_Label	Alexnet_Scratch	Densenet_Scratch	Predict_Consensus	Penalty	Trustability
cfb17a7cc8d4		0.500885	No_DR	No_DR	No_DR	1	0	0.500885
cfdbaef73a8b		0.354555	No_DR	No_DR	No_DR	1	0	0.354555
cfed7c1172ec		0.607479	No_DR	No_DR	No_DR	1	0	0.607479
cff262ed8f4c		0.362321	No_DR	No_DR	No_DR	1	0	0.362321
cffc50047828		0.462642	No_DR	No_DR	No_DR	1	0	0.462642
d02b79fc3200		0.411478	No_DR	No_DR	No_DR	1	0	0.411478
d0926ed2c8e5		0.505538	No_DR	No_DR	No_DR	1	0	0.505538
d160ebef4117		0.157939	No_DR	No_DR	No_DR	1	0	0.157939
d16e39b9d6f0		0.245308	No_DR	No_DR	No_DR	1	0	0.245308
d16e59a2b33a		0.393737	No_DR	No_DR	No_DR	1	0	0.393737
d18f6431ebce		0.494785	No_DR	No_DR	No_DR	1	0	0.494785
d1a60c3b9fe5		0.198223	No_DR	No_DR	No_DR	1	0	0.198223
d1afdb8cf70d		0.542007	No_DR	No_DR	No_DR	1	0	0.542007
d1b279cc02ae		0.471144	No_DR	No_DR	No_DR	1	0	0.471144
d1ca85af57c9		0.403874	No_DR	No_DR	No_DR	1	0	0.403874
d1cf31577a59		0	No_DR	No_DR	No_DR	1	0	0
d1f7ea924a01		0.333093	No_DR	No_DR	No_DR	1	0	0.333093
d1fa0f744620		0.28121	No_DR	No_DR	No_DR	1	0	0.28121
d26bb2ed6e71		0.293022	No_DR	No_DR	No_DR	1	0	0.293022
d26bc6e1230d		0.504414	No_DR	No_DR	No_DR	1	0	0.504414
d27ac9e54901		0.400108	No_DR	No_DR	No_DR	1	0	0.400108
d29b37d110f3		0.25686	No_DR	No_DR	No_DR	1	0	0.25686
d2afca74cbc3		0.329498	No_DR	No_DR	No_DR	1	0	0.329498
d2c5fb82fe5f		0.388069	No_DR	No_DR	No_DR	1	0	0.388069
d2cd47ed2c1d		0.210824	No_DR	No_DR	No_DR	1	0	0.210824
d2d523e9f669		0.188719	No_DR	No_DR	No_DR	1	0	0.188719
d2dc86021c67		0.468346	No_DR	No_DR	No_DR	1	0	0.468346
d2fb715b0c41		0.449615	No_DR	No_DR	No_DR	1	0	0.449615
d30d079e6f9a		0.585703	No_DR	No_DR	No_DR	1	0	0.585703
d332d7b8a26e		0.452487	No_DR	No_DR	No_DR	1	0	0.452487
d38cf0f4a9af		0.493644	No_DR	No_DR	No_DR	1	0	0.493644
d39752cb6e57		0.470827	No_DR	No_DR	No_DR	1	0	0.470827
d3dfd0a2dee6		0.140356	No_DR	No_DR	No_DR	1	0	0.140356
d3e56584a481		0.170177	No_DR	No_DR	No_DR	1	0	0.170177
d436c06f0490		0.611819	No_DR	No_DR	No_DR	1	0	0.611819
d4583e9525dc		0.364114	No_DR	No_DR	No_DR	1	0	0.364114
d4bc001f7224		0.196139	No_DR	No_DR	No_DR	1	0	0.196139
d516f77d4516		0.351553	No_DR	No_DR	No_DR	1	0	0.351553
d51c2153d151		0.386633	No_DR	No_DR	No_DR	1	0	0.386633
d51e5d7484ea		0.436656	No_DR	No_DR	No_DR	1	0	0.436656
d56d32a1d62d		0.172024	No_DR	No_DR	No_DR	1	0	0.172024
d57d1be1bbd1		0.122517	No_DR	No_DR	Severe	0	1	-0.877483
d5ad3362424c		0.570565	No_DR	No_DR	No_DR	1	0	0.570565
d5c63a8d9e94		0.528296	No_DR	No_DR	No_DR	1	0	0.528296
d6130f2ec903		0.352591	No_DR	No_DR	No_DR	1	0	0.352591
d667af5742f6		0.384358	No_DR	No_DR	No_DR	1	0	0.384358
d6803e467592		0.331222	No_DR	No_DR	No_DR	1	0	0.331222
d69698f838db		0.559877	No_DR	No_DR	No_DR	1	0	0.559877
d6b109c82067		0.553968	No_DR	No_DR	No_DR	1	0	0.553968
d6dbb0820ea5		0.459833	No_DR	No_DR	No_DR	1	0	0.459833
d6df4fe492ec		0.499368	No_DR	No_DR	No_DR	1	0	0.499368
d6f36ec5564a		0.299024	No_DR	No_DR	No_DR	1	0	0.299024
d6f6bdfd8011		0.349827	No_DR	No_DR	No_DR	1	0	0.349827
d7078e8b0349		0.332852	No_DR	No_DR	No_DR	1	0	0.332852
d74ccc796517		0.511422	No_DR	No_DR	No_DR	1	0	0.511422
d774692d9919		0.428567	No_DR	No_DR	No_DR	1	0	0.428567
d78b7401096f		0.264828	No_DR	No_DR	No_DR	1	0	0.264828
d7a01fca9838		0.318807	No_DR	No_DR	No_DR	1	0	0.318807
d7ab5c040294		0.354126	No_DR	No_DR	No_DR	1	0	0.354126
d7ac4a0c9760		0.442021	No_DR	No_DR	No_DR	1	0	0.442021
d7bc00091cfc		0.492237	No_DR	No_DR	No_DR	1	0	0.492237
d7bc62d60e8c		0.283029	No_DR	No_DR	No_DR	1	0	0.283029
d7e5fe5245e0		0.714003	No_DR	No_DR	Moderate	0	1	-0.285997
d807c53c1399		0.418388	No_DR	No_DR	No_DR	1	0	0.418388
d838d5b9f571		0.491211	No_DR	No_DR	No_DR	1	0	0.491211
d844a7252f4e		0.373085	No_DR	No_DR	Moderate	0	1	-0.626915
d865997a6280		0.377028	No_DR	No_DR	No_DR	1	0	0.377028
d866c26d76f0		0.240793	No_DR	No_DR	No_DR	1	0	0.240793
d871895742b1		0	No_DR	No_DR	No_DR	1	0	0
d881c04f01fe		0.517499	No_DR	No_DR	No_DR	1	0	0.517499
d88c4843aec3		0.539044	No_DR	No_DR	No_DR	1	0	0.539044
d8da9de62743		0.481108	No_DR	No_DR	No_DR	1	0	0.481108
d911dd40c63b		0.559552	No_DR	No_DR	No_DR	1	0	0.559552
d91635f380b4		0.203688	No_DR	No_DR	No_DR	1	0	0.203688
d93b61dc8f64		0.141091	No_DR	Moderate	No_DR	0	1	-0.858909
d97911a32918		0.505941	No_DR	No_DR	No_DR	1	0	0.505941
d99b0f7dd9b9		0.495799	No_DR	No_DR	No_DR	1	0	0.495799
d99dd99be001		0.453933	No_DR	No_DR	No_DR	1	0	0.453933
d9ad2a0ec026		0.525884	No_DR	No_DR	No_DR	1	0	0.525884
d9c9b9786da3		0.405588	No_DR	No_DR	No_DR	1	0	0.405588
d9d2631f043c		0.29799	No_DR	No_DR	No_DR	1	0	0.29799
d9e58e4d8689		0.476663	No_DR	Moderate	Mild	0	1	-0.523337
da0a83f074f3		0.173405	No_DR	No_DR	No_DR	1	0	0.173405
da2bdf4236ac		0.387555	No_DR	No_DR	No_DR	1	0	0.387555
da3a2275c850		0.558788	No_DR	No_DR	No_DR	1	0	0.558788
da6389d129aa		0.267644	No_DR	Moderate	No_DR	0	1	-0.732356
da6bbb76d562		0.339396	No_DR	No_DR	No_DR	1	0	0.339396
da9262d9f5d9		0.505266	No_DR	No_DR	No_DR	1	0	0.505266
da949aa67a4f		0.320657	No_DR	No_DR	No_DR	1	0	0.320657
da9574d35b82		0	No_DR	No_DR	No_DR	1	0	0
da9fe02dead3		0.333237	No_DR	No_DR	No_DR	1	0	0.333237
daad7b617f21		0.227528	No_DR	No_DR	No_DR	1	0	0.227528
daff5427c9b2		0.255119	No_DR	No_DR	No_DR	1	0	0.255119
db3cd58aa315		0.265512	No_DR	No_DR	No_DR	1	0	0.265512
db52626d450c		0.456126	No_DR	No_DR	No_DR	1	0	0.456126
db6207e62c7b		0.262656	No_DR	No_DR	No_DR	1	0	0.262656
dc0eea0b68a7		0.477262	No_DR	No_DR	No_DR	1	0	0.477262
dc0f6e5b489b		0.326144	No_DR	No_DR	No_DR	1	0	0.326144
dcc6c0ad5cad		0.311808	No_DR	No_DR	No_DR	1	0	0.311808
dccdf750c962		0.368911	No_DR	No_DR	No_DR	1	0	0.368911
dce73d90c00c		0.630551	No_DR	No_DR	No_DR	1	0	0.630551
dcf109df1a2b		0.220635	No_DR	No_DR	No_DR	1	0	0.220635
dd02d60bef14		0.27553	No_DR	No_DR	No_DR	1	0	0.27553
dd285d9e97fe		0.531733	No_DR	No_DR	No_DR	1	0	0.531733
dd3176bacfe2		0.432011	No_DR	No_DR	No_DR	1	0	0.432011
dd90c321d7bc		0.316221	No_DR	No_DR	No_DR	1	0	0.316221
ddb222ff7c1d		0.349519	No_DR	No_DR	No_DR	1	0	0.349519
de18071c36e6		0.271769	No_DR	No_DR	No_DR	1	0	0.271769
de2eb5c8aa83		0.245277	No_DR	No_DR	No_DR	1	0	0.245277
de38adaae009		0.033858	No_DR	No_DR	No_DR	1	0	0.033858
de4cdabbce6d		0.383247	No_DR	No_DR	No_DR	1	0	0.383247
de55ed25e0e8		0.432334	No_DR	No_DR	No_DR	1	0	0.432334
de57c9e9fa93		0.321826	No_DR	No_DR	No_DR	1	0	0.321826
de6210f88536		0.532683	No_DR	No_DR	No_DR	1	0	0.532683
de730033c683		0.423091	No_DR	No_DR	No_DR	1	0	0.423091
dea7538bb91a		0.081168	No_DR	No_DR	No_DR	1	0	0.081168
dec5595e6154		0.415352	No_DR	No_DR	No_DR	1	0	0.415352
dee1031a76ae		0.03602	No_DR	No_DR	No_DR	1	0	0.03602
dee31065f8fe		0.564212	No_DR	No_DR	No_DR	1	0	0.564212
df0886f1e76b		0.210199	No_DR	No_DR	No_DR	1	0	0.210199
df6d13d04da1		0.529915	No_DR	No_DR	No_DR	1	0	0.529915
df9cb3729eb1		0.45434	No_DR	No_DR	No_DR	1	0	0.45434
dfc7ec7db0e0		0.433662	No_DR	No_DR	No_DR	1	0	0.433662
dfea19863428		0.097149	No_DR	No_DR	No_DR	1	0	0.097149
e01b7bac822b		0.45588	No_DR	No_DR	No_DR	1	0	0.45588
e0313be77035		0.265891	No_DR	No_DR	No_DR	1	0	0.265891
e03a74e7d74f		0.265668	No_DR	No_DR	No_DR	1	0	0.265668
e04f3c6619a3		0.489047	No_DR	No_DR	No_DR	1	0	0.489047
e067b06fd655		0.556436	No_DR	No_DR	No_DR	1	0	0.556436
e06cccc08c59		0.515542	No_DR	No_DR	No_DR	1	0	0.515542
e087bd4b88f2		0.209211	No_DR	No_DR	No_DR	1	0	0.209211
e0d229db881a		0.470663	No_DR	No_DR	No_DR	1	0	0.470663
e12df54e0d1e		0.618584	No_DR	No_DR	Mild	0	1	-0.381416
e12f9f19d1be		0.459136	No_DR	No_DR	No_DR	1	0	0.459136
e135d7ba9a0e		0.37792	No_DR	No_DR	No_DR	1	0	0.37792
e160a3b19911		0.265176	No_DR	No_DR	No_DR	1	0	0.265176
e16af45285e5		0.298297	No_DR	No_DR	No_DR	1	0	0.298297
e1ab92228e60		0.532509	No_DR	Mild	Mild	1	1	-0.467491
e1b8acb1cea1		0.348935	No_DR	No_DR	No_DR	1	0	0.348935
e1c02f6c3362		0.28553	No_DR	No_DR	No_DR	1	0	0.28553
e1dc02a3dc2a		0.415474	No_DR	No_DR	No_DR	1	0	0.415474
e2265c383348		0.323401	No_DR	No_DR	No_DR	1	0	0.323401
e246cd89e1cc		0.439806	No_DR	No_DR	No_DR	1	0	0.439806
e251bdf05b85		0.268826	No_DR	No_DR	No_DR	1	0	0.268826
e26bcae6c67b		0.145545	No_DR	No_DR	No_DR	1	0	0.145545
e29e54ff921e		0.374466	No_DR	No_DR	No_DR	1	0	0.374466
e2c39ed0c941		0.667542	No_DR	No_DR	No_DR	1	0	0.667542
e2c3b037413b		0.536774	No_DR	Mild	Mild	1	1	-0.463226
e2ec22b3d07e		0.03806	No_DR	No_DR	No_DR	1	0	0.03806
e30a890600e1		0.141634	No_DR	No_DR	No_DR	1	0	0.141634
e322acd46152		0.125897	No_DR	No_DR	No_DR	1	0	0.125897
e33766353db2		0.231639	No_DR	No_DR	No_DR	1	0	0.231639
e3b47ed5b511		0.511882	No_DR	No_DR	No_DR	1	0	0.511882
e3cd96cb094c		0.373096	No_DR	No_DR	No_DR	1	0	0.373096
e42d9a94a66d		0.453665	No_DR	No_DR	No_DR	1	0	0.453665
e47452069ea1		0.315004	No_DR	No_DR	No_DR	1	0	0.315004
e47770a2e5d1		0.288046	No_DR	No_DR	No_DR	1	0	0.288046
e4a44f9158dc		0.436123	No_DR	No_DR	No_DR	1	0	0.436123
e4ae1ee6aada		0.448895	No_DR	No_DR	No_DR	1	0	0.448895
e4b0df29b96f		0.437523	No_DR	No_DR	No_DR	1	0	0.437523
e4c799738a19		0.402258	No_DR	No_DR	No_DR	1	0	0.402258
e4d3d437b0a8		0.512451	No_DR	No_DR	No_DR	1	0	0.512451
e4dcca36ceb4		0.459172	No_DR	No_DR	No_DR	1	0	0.459172
e50b0174690d		0.597084	No_DR	No_DR	No_DR	1	0	0.597084
e5197d77ec68		0.237298	No_DR	No_DR	No_DR	1	0	0.237298
e529c5757d64		0.410088	No_DR	No_DR	No_DR	1	0	0.410088
e582e56e7942		0.485987	No_DR	No_DR	No_DR	1	0	0.485987
e594c19e2e1d		0.467169	No_DR	No_DR	No_DR	1	0	0.467169
e59c5f345bb0		0.397284	No_DR	No_DR	No_DR	1	0	0.397284
e5de79795c1d		0.306126	No_DR	No_DR	No_DR	1	0	0.306126
e5f332efcbc7		0.08933	No_DR	No_DR	No_DR	1	0	0.08933
e5f73f2855c0		0.461541	No_DR	No_DR	No_DR	1	0	0.461541
e60e4edb3ca9		0.463186	No_DR	No_DR	No_DR	1	0	0.463186
e632e38fd2d4		0.378764	No_DR	No_DR	No_DR	1	0	0.378764
e6552b7432b3		0.548634	No_DR	No_DR	No_DR	1	0	0.548634
e66855a5c583		0.527446	No_DR	No_DR	No_DR	1	0	0.527446
e66ad813a508		0.496344	No_DR	No_DR	No_DR	1	0	0.496344
e68746d426b2		0.352653	No_DR	No_DR	No_DR	1	0	0.352653
e68bdd36e589		0.159306	No_DR	No_DR	No_DR	1	0	0.159306
e69b48516577		0.168931	No_DR	No_DR	No_DR	1	0	0.168931
e6a5e4718873		0.462624	No_DR	No_DR	No_DR	1	0	0.462624
e7291472109b		0.250791	No_DR	No_DR	No_DR	1	0	0.250791
e7578d8dba72		0.228181	No_DR	No_DR	No_DR	1	0	0.228181
e77a93c3d9a9		0.249208	No_DR	No_DR	No_DR	1	0	0.249208
e79e10907295		0.301776	No_DR	No_DR	No_DR	1	0	0.301776
e7b5dd5bab1f		0.469089	No_DR	No_DR	No_DR	1	0	0.469089
e81f4a2fbbdc		0.206514	No_DR	No_DR	No_DR	1	0	0.206514
e82232a3c28b		0.426768	No_DR	No_DR	No_DR	1	0	0.426768
e893e86dde94		0.690898	No_DR	No_DR	No_DR	1	0	0.690898
e8ddfc9709ce		0.678113	No_DR	No_DR	No_DR	1	0	0.678113
e8e44b3160e3		0.520944	No_DR	No_DR	No_DR	1	0	0.520944
e907d23cce3d		0.253456	No_DR	No_DR	No_DR	1	0	0.253456
e933923aab15		0.436025	No_DR	No_DR	No_DR	1	0	0.436025
e966850247f4		0.548398	No_DR	No_DR	No_DR	1	0	0.548398
e9678824215d		0.314589	No_DR	No_DR	No_DR	1	0	0.314589
e97ecf4355cb		0.345621	No_DR	No_DR	No_DR	1	0	0.345621
e9ce5bf645ab		0.641153	No_DR	No_DR	No_DR	1	0	0.641153
e9f3c85a2a02		0.412411	No_DR	No_DR	No_DR	1	0	0.412411
e9faf0296643		0.205196	No_DR	No_DR	No_DR	1	0	0.205196
ea4ce9516144		0.287751	No_DR	No_DR	No_DR	1	0	0.287751
ea5c42a78979		0.573851	No_DR	No_DR	No_DR	1	0	0.573851
ea68b58a6e8f		0.530121	No_DR	No_DR	No_DR	1	0	0.530121
ea6a53e54d0f		0.358004	No_DR	No_DR	No_DR	1	0	0.358004
ea7e21bab610		0.383174	No_DR	No_DR	No_DR	1	0	0.383174
ea9c41e1ced0		0.439395	No_DR	No_DR	No_DR	1	0	0.439395
eabc7c716255		0.435808	No_DR	No_DR	No_DR	1	0	0.435808
eabf421f94d0		0.498055	No_DR	No_DR	Mild	0	1	-0.501945
eae70f527755		0.507259	No_DR	No_DR	No_DR	1	0	0.507259
eb050765b323		0.374104	No_DR	No_DR	No_DR	1	0	0.374104
eb175669d789		0.23557	No_DR	No_DR	No_DR	1	0	0.23557
eb6b1f1c09db		0.39735	No_DR	Moderate	Moderate	1	1	-0.60265
ebd96d853918		0.596833	No_DR	No_DR	No_DR	1	0	0.596833
ebf4b22240f4		0.434783	No_DR	No_DR	No_DR	1	0	0.434783
ec01f0862669		0.522063	No_DR	No_DR	No_DR	1	0	0.522063
ec0c9f817b03		0.484322	No_DR	No_DR	No_DR	1	0	0.484322
ec363f48867b		0	No_DR	No_DR	No_DR	1	0	0
ec57cc20d776		0.317898	No_DR	No_DR	No_DR	1	0	0.317898
ec6659926105		0.544501	No_DR	No_DR	No_DR	1	0	0.544501
ec6f1797a25a		0.432054	No_DR	No_DR	No_DR	1	0	0.432054
ecad6845f630		0.192307	No_DR	No_DR	No_DR	1	0	0.192307
ecb4500285ed		0.087001	No_DR	No_DR	No_DR	1	0	0.087001
ed2c52c14493		0.489891	No_DR	No_DR	No_DR	1	0	0.489891
ed2ef440d22c		0.170102	No_DR	No_DR	No_DR	1	0	0.170102
ed3ce1674761		0.571623	No_DR	No_DR	No_DR	1	0	0.571623
ed648b9bcd95		0.354171	No_DR	No_DR	No_DR	1	0	0.354171
ed6bd9293a89		0.525924	No_DR	No_DR	No_DR	1	0	0.525924
eda1d75cbcf0		0.453382	No_DR	No_DR	No_DR	1	0	0.453382
eda29a9d78f3		0.489226	No_DR	No_DR	No_DR	1	0	0.489226
edceb0657d77		0.357008	No_DR	No_DR	No_DR	1	0	0.357008
ee36ca728641		0.241329	No_DR	No_DR	No_DR	1	0	0.241329
ee3f5cf52188		0.316689	No_DR	No_DR	No_DR	1	0	0.316689
ee3fe7809e6a		0.241245	No_DR	No_DR	No_DR	1	0	0.241245
ee77763a6afb		0.256485	No_DR	No_DR	No_DR	1	0	0.256485
eeaea2c5ff34		0.231476	No_DR	No_DR	No_DR	1	0	0.231476
eebd1e195952		0.299438	No_DR	No_DR	No_DR	1	0	0.299438
eedae6b28f96		0.283855	No_DR	No_DR	Moderate	0	1	-0.716145
ef247f28004f		0.302231	No_DR	No_DR	No_DR	1	0	0.302231
ef4121e9bb67		0.591523	No_DR	No_DR	No_DR	1	0	0.591523
ef476be214d4		0.170785	No_DR	No_DR	No_DR	1	0	0.170785
ef48780f5d5f		0.370832	No_DR	No_DR	No_DR	1	0	0.370832
ef5155990874		0.562591	No_DR	No_DR	No_DR	1	0	0.562591
ef7eb85b75fc		0.528475	No_DR	No_DR	No_DR	1	0	0.528475
ef81cd8854cb		0.314346	No_DR	No_DR	No_DR	1	0	0.314346
ef8c39eb9157		0.430022	No_DR	No_DR	No_DR	1	0	0.430022
ef99c499d665		0.527132	No_DR	No_DR	No_DR	1	0	0.527132
f002ce614c59		0.435221	No_DR	No_DR	No_DR	1	0	0.435221
f00ce9b9d6f4		0.491094	No_DR	No_DR	No_DR	1	0	0.491094
f02057c41256		0.498793	No_DR	No_DR	No_DR	1	0	0.498793
f0267c42907c		0.431154	No_DR	No_DR	No_DR	1	0	0.431154
f02956bd7c50		0.208647	No_DR	No_DR	No_DR	1	0	0.208647
f02babb3a023		0.463576	No_DR	No_DR	No_DR	1	0	0.463576
f0546a45ef10		0.565553	No_DR	No_DR	No_DR	1	0	0.565553
f066db7a2efe		0.555237	No_DR	Mild	Mild	1	1	-0.444763
f06e7a9df795		0.141439	No_DR	No_DR	No_DR	1	0	0.141439
f0860c21533b		0.105758	No_DR	No_DR	No_DR	1	0	0.105758
f09cfc6a4dbd		0.487425	No_DR	No_DR	No_DR	1	0	0.487425
f09fd9433dff		0.347466	No_DR	No_DR	No_DR	1	0	0.347466
f0a2dc580009		0.151167	No_DR	No_DR	No_DR	1	0	0.151167
f0e1201b5c1f		0.409496	No_DR	No_DR	No_DR	1	0	0.409496
f1979147aad4		0.01352	No_DR	No_DR	No_DR	1	0	0.01352
f1d719c97838		0.363738	No_DR	No_DR	No_DR	1	0	0.363738
f233638e0e90		0.200223	No_DR	No_DR	No_DR	1	0	0.200223
f252046c0fe6		0.599557	No_DR	No_DR	No_DR	1	0	0.599557
f26b02ead915		0.396222	No_DR	No_DR	No_DR	1	0	0.396222
f298b7d05958		0.670095	No_DR	No_DR	No_DR	1	0	0.670095
f2c0b41acd05		0.179373	No_DR	No_DR	No_DR	1	0	0.179373
f2f569a64949		0.29251	No_DR	No_DR	No_DR	1	0	0.29251
f35d80bb1a22		0.564319	No_DR	No_DR	No_DR	1	0	0.564319
f361060eda3e		0.504975	No_DR	No_DR	No_DR	1	0	0.504975
f366fb1cc475		0.526397	No_DR	No_DR	No_DR	1	0	0.526397
f36cb007a1ef		0.552368	No_DR	No_DR	No_DR	1	0	0.552368
f3a4751af42e		0.723038	No_DR	No_DR	Moderate	0	1	-0.276962
f3b27ac2d371		0.407305	No_DR	No_DR	No_DR	1	0	0.407305
f3bb996b45ce		0.518084	No_DR	No_DR	No_DR	1	0	0.518084
f42b693a9414		0.371985	No_DR	No_DR	No_DR	1	0	0.371985
f431f2e119d7		0.349299	No_DR	No_DR	No_DR	1	0	0.349299
f451eee2b66b		0.506565	No_DR	No_DR	No_DR	1	0	0.506565
f48241b0c995		0.387319	No_DR	No_DR	No_DR	1	0	0.387319
f4874247ede6		0.483132	No_DR	No_DR	No_DR	1	0	0.483132
f4c7ae514c54		0.329154	No_DR	No_DR	No_DR	1	0	0.329154
f4d3169b468a		0.440493	No_DR	No_DR	No_DR	1	0	0.440493
f4de9620e3f2		0.203899	No_DR	No_DR	No_DR	1	0	0.203899
f4df3d86688d		0.362515	No_DR	No_DR	No_DR	1	0	0.362515
f4e68b61f480		0.352649	No_DR	No_DR	No_DR	1	0	0.352649
f4ea2a2cfbb9		0.492238	No_DR	No_DR	No_DR	1	0	0.492238
f531232ecb55		0.613122	No_DR	No_DR	No_DR	1	0	0.613122
f56ff0440ed1		0.481031	No_DR	No_DR	No_DR	1	0	0.481031
f5733f77273d		0.498607	No_DR	No_DR	No_DR	1	0	0.498607
f57cf3b6f48e		0.375629	No_DR	No_DR	No_DR	1	0	0.375629
f580566e27f5		0.053666	No_DR	No_DR	No_DR	1	0	0.053666
f58cdfa968be		0.15341	No_DR	No_DR	No_DR	1	0	0.15341
f58f0b2fd718		0.477493	No_DR	No_DR	No_DR	1	0	0.477493
f5c953bee7cd		0.494985	No_DR	No_DR	No_DR	1	0	0.494985
f62b8a076833		0.230594	No_DR	No_DR	No_DR	1	0	0.230594
f633c474e8b8		0.681462	No_DR	No_DR	No_DR	1	0	0.681462
f64b6e85f1c9		0.358438	No_DR	No_DR	No_DR	1	0	0.358438
f66c4ee86629		0.201738	No_DR	No_DR	No_DR	1	0	0.201738
f68690db78d3		0.350383	No_DR	No_DR	No_DR	1	0	0.350383
f6d760566a51		0.421296	No_DR	No_DR	No_DR	1	0	0.421296
f7116e7b2f4e		0.49217	No_DR	No_DR	No_DR	1	0	0.49217
f71333204618		0.325163	No_DR	No_DR	No_DR	1	0	0.325163
f71aca5a7dc3		0.265019	No_DR	No_DR	No_DR	1	0	0.265019
f71bea807c96		0.395835	No_DR	No_DR	No_DR	1	0	0.395835
f7508f14dd7b		0.447556	No_DR	No_DR	No_DR	1	0	0.447556
f7735b6d47f7		0.504002	No_DR	No_DR	No_DR	1	0	0.504002
f7defe70afc3		0.194487	No_DR	No_DR	No_DR	1	0	0.194487
f7e9fa75c7c1		0.494846	No_DR	No_DR	No_DR	1	0	0.494846
f819c65b803c		0.164771	No_DR	No_DR	No_DR	1	0	0.164771
f85c78201a50		0.472746	No_DR	No_DR	No_DR	1	0	0.472746
f85fd4fac887		0.430267	No_DR	No_DR	No_DR	1	0	0.430267
f86d1c404acb		0.352216	No_DR	No_DR	No_DR	1	0	0.352216
f8d62557ad0c		0.153399	No_DR	No_DR	No_DR	1	0	0.153399
f8f5942b690e		0.183011	No_DR	No_DR	No_DR	1	0	0.183011
f90f8931a9bc		0.490652	No_DR	No_DR	No_DR	1	0	0.490652
f91cfa82b9d4		0.387659	No_DR	No_DR	No_DR	1	0	0.387659
f952ad2e4356		0.330719	No_DR	No_DR	No_DR	1	0	0.330719
f994a3b07935		0.621773	No_DR	No_DR	No_DR	1	0	0.621773
f9d52509c571		0.581339	No_DR	No_DR	No_DR	1	0	0.581339
f9d8ff3e6592		0.398524	No_DR	No_DR	No_DR	1	0	0.398524
f9e1c439d4c8		0.437861	No_DR	No_DR	No_DR	1	0	0.437861
fa0c87bd75ce		0.030509	No_DR	No_DR	No_DR	1	0	0.030509
fa573163dd8b		0.326298	No_DR	No_DR	No_DR	1	0	0.326298
fa6f3d8bb1d5		0.474475	No_DR	No_DR	No_DR	1	0	0.474475
fa7fa797c650		0.413755	No_DR	No_DR	No_DR	1	0	0.413755
fa9bece586fc		0.437471	No_DR	No_DR	No_DR	1	0	0.437471
fa9f1bc03f21		0.407127	No_DR	No_DR	No_DR	1	0	0.407127
fb1b8771c70a		0.388409	No_DR	No_DR	No_DR	1	0	0.388409
fb767cea406c		0.06716	No_DR	No_DR	No_DR	1	0	0.06716
fb88783de055		0.312477	No_DR	No_DR	No_DR	1	0	0.312477
fb88d23fc5fe		0.524663	No_DR	No_DR	No_DR	1	0	0.524663
fbcbc81cf9be		0.728498	No_DR	No_DR	No_DR	1	0	0.728498
fbdc796290d4		0.442467	No_DR	No_DR	No_DR	1	0	0.442467
fbfa925506f6		0.311185	No_DR	No_DR	No_DR	1	0	0.311185
fc782722a50c		0.367418	No_DR	No_DR	No_DR	1	0	0.367418
fc898dfeb24f		0.181505	No_DR	No_DR	No_DR	1	0	0.181505
fc8fce67fbf8		0.200288	No_DR	No_DR	No_DR	1	0	0.200288
fca1a8738b8a		0.542128	No_DR	No_DR	No_DR	1	0	0.542128
fcc32dffd24d		0.283273	No_DR	No_DR	No_DR	1	0	0.283273
fce73678f650		0.593137	No_DR	No_DR	No_DR	1	0	0.593137
fd079d2e93a2		0.342077	No_DR	No_DR	No_DR	1	0	0.342077
fd0a70082e7c		0.517856	No_DR	No_DR	No_DR	1	0	0.517856
fd4c946c52bf		0.2538	No_DR	No_DR	No_DR	1	0	0.2538
fd87b6b2e664		0.440037	No_DR	No_DR	No_DR	1	0	0.440037
fdbc252813b1		0.221127	No_DR	No_DR	No_DR	1	0	0.221127
fdc685055659		0.446744	No_DR	No_DR	No_DR	1	0	0.446744
fe06dad6851c		0.429208	No_DR	No_DR	No_DR	1	0	0.429208
fe0e2dee1834		0.418211	No_DR	No_DR	No_DR	1	0	0.418211
fe3b0e50be78		0.357813	No_DR	No_DR	No_DR	1	0	0.357813
fe3f62695b2d		0.511101	No_DR	No_DR	No_DR	1	0	0.511101
febfb20dc311		0.468059	No_DR	No_DR	No_DR	1	0	0.468059
fed5bb685832		0.409789	No_DR	No_DR	No_DR	1	0	0.409789
fefded6bf135		0.294425	No_DR	No_DR	Severe	0	1	-0.705575
ff03f74667df		0.113052	No_DR	No_DR	No_DR	1	0	0.113052
ff1e940105f9		0.473475	No_DR	No_DR	No_DR	1	0	0.473475
ff4832d55461		0.179977	No_DR	No_DR	No_DR	1	0	0.179977
ff4955e76894		0.56657	No_DR	Mild	Mild	1	1	-0.43343
ff4cd992667b		0.402277	No_DR	No_DR	No_DR	1	0	0.402277
ff59d44a70a7		0.376293	No_DR	No_DR	No_DR	1	0	0.376293
ff631653374e		0.401403	No_DR	No_DR	No_DR	1	0	0.401403
ffc04fed30e6		0.315025	No_DR	No_DR	No_DR	1	0	0.315025
ffd97f8cd5aa		0.441799	No_DR	No_DR	No_DR	1	0	0.441799
						350	16	121.439

## Sheet: NODR_1_alexnet_mobilenetv2
		Activation Maps Consensus		Network 1	Network 2
Immagine	Immagine	Gradcam-Consensus	True_Label	Alexnet_Scratch	Densenet_Scratch	Predict_Consensus	Penalty	Trustability
cfb17a7cc8d4		0.530729	No_DR	No_DR	No_DR	1	0	0.530729
cfdbaef73a8b		0.289785	No_DR	No_DR	No_DR	1	0	0.289785
cfed7c1172ec		0.715966	No_DR	No_DR	No_DR	1	0	0.715966
cff262ed8f4c		0.401804	No_DR	No_DR	No_DR	1	0	0.401804
cffc50047828		0.506162	No_DR	No_DR	No_DR	1	0	0.506162
d02b79fc3200		0.707138	No_DR	No_DR	No_DR	1	0	0.707138
d0926ed2c8e5		0.693958	No_DR	No_DR	No_DR	1	0	0.693958
d160ebef4117		0.403435	No_DR	No_DR	No_DR	1	0	0.403435
d16e39b9d6f0		0.229113	No_DR	No_DR	No_DR	1	0	0.229113
d16e59a2b33a		0.311126	No_DR	No_DR	No_DR	1	0	0.311126
d18f6431ebce		0.558035	No_DR	No_DR	No_DR	1	0	0.558035
d1a60c3b9fe5		0.373754	No_DR	No_DR	No_DR	1	0	0.373754
d1afdb8cf70d		0.465363	No_DR	No_DR	No_DR	1	0	0.465363
d1b279cc02ae		0.575272	No_DR	No_DR	No_DR	1	0	0.575272
d1ca85af57c9		0.485828	No_DR	No_DR	No_DR	1	0	0.485828
d1cf31577a59		0.345656	No_DR	No_DR	No_DR	1	0	0.345656
d1f7ea924a01		0.428126	No_DR	No_DR	No_DR	1	0	0.428126
d1fa0f744620		0.521228	No_DR	No_DR	No_DR	1	0	0.521228
d26bb2ed6e71		0.433254	No_DR	No_DR	No_DR	1	0	0.433254
d26bc6e1230d		0.619457	No_DR	No_DR	No_DR	1	0	0.619457
d27ac9e54901		0.455686	No_DR	No_DR	No_DR	1	0	0.455686
d29b37d110f3		0.344574	No_DR	No_DR	No_DR	1	0	0.344574
d2afca74cbc3		0.218206	No_DR	No_DR	No_DR	1	0	0.218206
d2c5fb82fe5f		0.428092	No_DR	No_DR	No_DR	1	0	0.428092
d2cd47ed2c1d		0.305767	No_DR	No_DR	No_DR	1	0	0.305767
d2d523e9f669		0.271323	No_DR	No_DR	No_DR	1	0	0.271323
d2dc86021c67		0.512676	No_DR	No_DR	No_DR	1	0	0.512676
d2fb715b0c41		0.578895	No_DR	No_DR	No_DR	1	0	0.578895
d30d079e6f9a		0.563888	No_DR	No_DR	No_DR	1	0	0.563888
d332d7b8a26e		0.360037	No_DR	No_DR	No_DR	1	0	0.360037
d38cf0f4a9af		0.53205	No_DR	No_DR	No_DR	1	0	0.53205
d39752cb6e57		0.554057	No_DR	No_DR	No_DR	1	0	0.554057
d3dfd0a2dee6		0.365834	No_DR	No_DR	No_DR	1	0	0.365834
d3e56584a481		0.416721	No_DR	No_DR	No_DR	1	0	0.416721
d436c06f0490		0.702282	No_DR	No_DR	No_DR	1	0	0.702282
d4583e9525dc		0.067864	No_DR	No_DR	No_DR	1	0	0.067864
d4bc001f7224		0.316284	No_DR	No_DR	No_DR	1	0	0.316284
d516f77d4516		0.418102	No_DR	No_DR	No_DR	1	0	0.418102
d51c2153d151		0.592464	No_DR	No_DR	No_DR	1	0	0.592464
d51e5d7484ea		0.486673	No_DR	No_DR	No_DR	1	0	0.486673
d56d32a1d62d		0.237404	No_DR	No_DR	No_DR	1	0	0.237404
d57d1be1bbd1		0.176746	No_DR	No_DR	Moderate	0	1	-0.823254
d5ad3362424c		0.325163	No_DR	No_DR	No_DR	1	0	0.325163
d5c63a8d9e94		0.543922	No_DR	No_DR	No_DR	1	0	0.543922
d6130f2ec903		0.339463	No_DR	No_DR	No_DR	1	0	0.339463
d667af5742f6		0.372411	No_DR	No_DR	No_DR	1	0	0.372411
d6803e467592		0.520144	No_DR	No_DR	No_DR	1	0	0.520144
d69698f838db		0.501614	No_DR	No_DR	No_DR	1	0	0.501614
d6b109c82067		0.601335	No_DR	No_DR	No_DR	1	0	0.601335
d6dbb0820ea5		0.518699	No_DR	No_DR	No_DR	1	0	0.518699
d6df4fe492ec		0.511675	No_DR	No_DR	No_DR	1	0	0.511675
d6f36ec5564a		0.266029	No_DR	No_DR	No_DR	1	0	0.266029
d6f6bdfd8011		0.287602	No_DR	No_DR	No_DR	1	0	0.287602
d7078e8b0349		0.349186	No_DR	No_DR	No_DR	1	0	0.349186
d74ccc796517		0.658133	No_DR	No_DR	No_DR	1	0	0.658133
d774692d9919		0.580636	No_DR	No_DR	No_DR	1	0	0.580636
d78b7401096f		0.390698	No_DR	No_DR	No_DR	1	0	0.390698
d7a01fca9838		0.493397	No_DR	No_DR	No_DR	1	0	0.493397
d7ab5c040294		0.188325	No_DR	No_DR	No_DR	1	0	0.188325
d7ac4a0c9760		0.600656	No_DR	No_DR	No_DR	1	0	0.600656
d7bc00091cfc		0.334061	No_DR	No_DR	No_DR	1	0	0.334061
d7bc62d60e8c		0.341583	No_DR	No_DR	Mild	0	1	-0.658417
d7e5fe5245e0		0.587137	No_DR	No_DR	No_DR	1	0	0.587137
d807c53c1399		0.523517	No_DR	No_DR	No_DR	1	0	0.523517
d838d5b9f571		0.598363	No_DR	No_DR	No_DR	1	0	0.598363
d844a7252f4e		0.509307	No_DR	No_DR	Moderate	0	1	-0.490693
d865997a6280		0.459244	No_DR	No_DR	No_DR	1	0	0.459244
d866c26d76f0		0.527092	No_DR	No_DR	No_DR	1	0	0.527092
d871895742b1		0.192854	No_DR	No_DR	No_DR	1	0	0.192854
d881c04f01fe		0.620955	No_DR	No_DR	No_DR	1	0	0.620955
d88c4843aec3		0.63139	No_DR	No_DR	No_DR	1	0	0.63139
d8da9de62743		0.538686	No_DR	No_DR	No_DR	1	0	0.538686
d911dd40c63b		0.497839	No_DR	No_DR	No_DR	1	0	0.497839
d91635f380b4		0.168148	No_DR	No_DR	No_DR	1	0	0.168148
d93b61dc8f64		0.166909	No_DR	Moderate	No_DR	0	1	-0.833091
d97911a32918		0.562103	No_DR	No_DR	No_DR	1	0	0.562103
d99b0f7dd9b9		0.632474	No_DR	No_DR	No_DR	1	0	0.632474
d99dd99be001		0.473823	No_DR	No_DR	No_DR	1	0	0.473823
d9ad2a0ec026		0.546229	No_DR	No_DR	No_DR	1	0	0.546229
d9c9b9786da3		0.458061	No_DR	No_DR	No_DR	1	0	0.458061
d9d2631f043c		0.26711	No_DR	No_DR	No_DR	1	0	0.26711
d9e58e4d8689		0.332674	No_DR	Moderate	Moderate	1	1	-0.667326
da0a83f074f3		0.382776	No_DR	No_DR	No_DR	1	0	0.382776
da2bdf4236ac		0.411622	No_DR	No_DR	No_DR	1	0	0.411622
da3a2275c850		0.551543	No_DR	No_DR	No_DR	1	0	0.551543
da6389d129aa		0.560422	No_DR	Moderate	Moderate	1	1	-0.439578
da6bbb76d562		0.284068	No_DR	No_DR	No_DR	1	0	0.284068
da9262d9f5d9		0.51592	No_DR	No_DR	No_DR	1	0	0.51592
da949aa67a4f		0.51598	No_DR	No_DR	No_DR	1	0	0.51598
da9574d35b82		0.262594	No_DR	No_DR	No_DR	1	0	0.262594
da9fe02dead3		0.590729	No_DR	No_DR	No_DR	1	0	0.590729
daad7b617f21		0.362048	No_DR	No_DR	No_DR	1	0	0.362048
daff5427c9b2		0.199445	No_DR	No_DR	No_DR	1	0	0.199445
db3cd58aa315		0.353883	No_DR	No_DR	No_DR	1	0	0.353883
db52626d450c		0.567989	No_DR	No_DR	No_DR	1	0	0.567989
db6207e62c7b		0.267699	No_DR	No_DR	No_DR	1	0	0.267699
dc0eea0b68a7		0.370754	No_DR	No_DR	No_DR	1	0	0.370754
dc0f6e5b489b		0.363566	No_DR	No_DR	No_DR	1	0	0.363566
dcc6c0ad5cad		0.166966	No_DR	No_DR	Moderate	0	1	-0.833034
dccdf750c962		0.52874	No_DR	No_DR	No_DR	1	0	0.52874
dce73d90c00c		0.541688	No_DR	No_DR	No_DR	1	0	0.541688
dcf109df1a2b		0.263211	No_DR	No_DR	No_DR	1	0	0.263211
dd02d60bef14		0.367684	No_DR	No_DR	No_DR	1	0	0.367684
dd285d9e97fe		0.63608	No_DR	No_DR	No_DR	1	0	0.63608
dd3176bacfe2		0.157282	No_DR	No_DR	No_DR	1	0	0.157282
dd90c321d7bc		0.352842	No_DR	No_DR	No_DR	1	0	0.352842
ddb222ff7c1d		0.419467	No_DR	No_DR	No_DR	1	0	0.419467
de18071c36e6		0.356966	No_DR	No_DR	No_DR	1	0	0.356966
de2eb5c8aa83		0.21951	No_DR	No_DR	No_DR	1	0	0.21951
de38adaae009		0.369247	No_DR	No_DR	No_DR	1	0	0.369247
de4cdabbce6d		0.362504	No_DR	No_DR	No_DR	1	0	0.362504
de55ed25e0e8		0.464194	No_DR	No_DR	No_DR	1	0	0.464194
de57c9e9fa93		0.374655	No_DR	No_DR	No_DR	1	0	0.374655
de6210f88536		0.552706	No_DR	No_DR	No_DR	1	0	0.552706
de730033c683		0.177202	No_DR	No_DR	No_DR	1	0	0.177202
dea7538bb91a		0.598723	No_DR	No_DR	No_DR	1	0	0.598723
dec5595e6154		0.472509	No_DR	No_DR	No_DR	1	0	0.472509
dee1031a76ae		0.322787	No_DR	No_DR	No_DR	1	0	0.322787
dee31065f8fe		0.629226	No_DR	No_DR	No_DR	1	0	0.629226
df0886f1e76b		0.254913	No_DR	No_DR	No_DR	1	0	0.254913
df6d13d04da1		0.512236	No_DR	No_DR	No_DR	1	0	0.512236
df9cb3729eb1		0.610013	No_DR	No_DR	No_DR	1	0	0.610013
dfc7ec7db0e0		0.65248	No_DR	No_DR	No_DR	1	0	0.65248
dfea19863428		0.555375	No_DR	No_DR	No_DR	1	0	0.555375
e01b7bac822b		0.56548	No_DR	No_DR	Moderate	0	1	-0.43452
e0313be77035		0.231506	No_DR	No_DR	No_DR	1	0	0.231506
e03a74e7d74f		0.095637	No_DR	No_DR	No_DR	1	0	0.095637
e04f3c6619a3		0.564742	No_DR	No_DR	No_DR	1	0	0.564742
e067b06fd655		0.65221	No_DR	No_DR	No_DR	1	0	0.65221
e06cccc08c59		0.636393	No_DR	No_DR	No_DR	1	0	0.636393
e087bd4b88f2		0.517773	No_DR	No_DR	No_DR	1	0	0.517773
e0d229db881a		0.529252	No_DR	No_DR	No_DR	1	0	0.529252
e12df54e0d1e		0.613472	No_DR	No_DR	No_DR	1	0	0.613472
e12f9f19d1be		0.216936	No_DR	No_DR	No_DR	1	0	0.216936
e135d7ba9a0e		0.386468	No_DR	No_DR	No_DR	1	0	0.386468
e160a3b19911		0.177699	No_DR	No_DR	No_DR	1	0	0.177699
e16af45285e5		0.326462	No_DR	No_DR	No_DR	1	0	0.326462
e1ab92228e60		0.589473	No_DR	Mild	Moderate	0	1	-0.410527
e1b8acb1cea1		0.536569	No_DR	No_DR	No_DR	1	0	0.536569
e1c02f6c3362		0.311689	No_DR	No_DR	No_DR	1	0	0.311689
e1dc02a3dc2a		0.437112	No_DR	No_DR	No_DR	1	0	0.437112
e2265c383348		0.258455	No_DR	No_DR	No_DR	1	0	0.258455
e246cd89e1cc		0.57646	No_DR	No_DR	No_DR	1	0	0.57646
e251bdf05b85		0.266229	No_DR	No_DR	No_DR	1	0	0.266229
e26bcae6c67b		0.125705	No_DR	No_DR	Moderate	0	1	-0.874295
e29e54ff921e		0.573012	No_DR	No_DR	No_DR	1	0	0.573012
e2c39ed0c941		0.647279	No_DR	No_DR	No_DR	1	0	0.647279
e2c3b037413b		0.554537	No_DR	Mild	Mild	1	1	-0.445463
e2ec22b3d07e		0.448048	No_DR	No_DR	No_DR	1	0	0.448048
e30a890600e1		0.207879	No_DR	No_DR	No_DR	1	0	0.207879
e322acd46152		0.202639	No_DR	No_DR	No_DR	1	0	0.202639
e33766353db2		0.120837	No_DR	No_DR	No_DR	1	0	0.120837
e3b47ed5b511		0.639495	No_DR	No_DR	No_DR	1	0	0.639495
e3cd96cb094c		0.448885	No_DR	No_DR	No_DR	1	0	0.448885
e42d9a94a66d		0.115608	No_DR	No_DR	No_DR	1	0	0.115608
e47452069ea1		0.411271	No_DR	No_DR	No_DR	1	0	0.411271
e47770a2e5d1		0.12787	No_DR	No_DR	No_DR	1	0	0.12787
e4a44f9158dc		0.618627	No_DR	No_DR	No_DR	1	0	0.618627
e4ae1ee6aada		0.544004	No_DR	No_DR	No_DR	1	0	0.544004
e4b0df29b96f		0.551949	No_DR	No_DR	No_DR	1	0	0.551949
e4c799738a19		0.402185	No_DR	No_DR	No_DR	1	0	0.402185
e4d3d437b0a8		0.525174	No_DR	No_DR	No_DR	1	0	0.525174
e4dcca36ceb4		0.428003	No_DR	No_DR	No_DR	1	0	0.428003
e50b0174690d		0.643023	No_DR	No_DR	No_DR	1	0	0.643023
e5197d77ec68		0.389141	No_DR	No_DR	No_DR	1	0	0.389141
e529c5757d64		0.267853	No_DR	No_DR	No_DR	1	0	0.267853
e582e56e7942		0.572596	No_DR	No_DR	No_DR	1	0	0.572596
e594c19e2e1d		0.545017	No_DR	No_DR	No_DR	1	0	0.545017
e59c5f345bb0		0.500902	No_DR	No_DR	No_DR	1	0	0.500902
e5de79795c1d		0.334822	No_DR	No_DR	No_DR	1	0	0.334822
e5f332efcbc7		0.225706	No_DR	No_DR	No_DR	1	0	0.225706
e5f73f2855c0		0.56282	No_DR	No_DR	No_DR	1	0	0.56282
e60e4edb3ca9		0.441126	No_DR	No_DR	No_DR	1	0	0.441126
e632e38fd2d4		0.218793	No_DR	No_DR	No_DR	1	0	0.218793
e6552b7432b3		0.610877	No_DR	No_DR	No_DR	1	0	0.610877
e66855a5c583		0.431116	No_DR	No_DR	No_DR	1	0	0.431116
e66ad813a508		0.499308	No_DR	No_DR	No_DR	1	0	0.499308
e68746d426b2		0.30891	No_DR	No_DR	No_DR	1	0	0.30891
e68bdd36e589		0.341778	No_DR	No_DR	No_DR	1	0	0.341778
e69b48516577		0.194097	No_DR	No_DR	No_DR	1	0	0.194097
e6a5e4718873		0.513823	No_DR	No_DR	No_DR	1	0	0.513823
e7291472109b		0.486049	No_DR	No_DR	No_DR	1	0	0.486049
e7578d8dba72		0.649704	No_DR	No_DR	No_DR	1	0	0.649704
e77a93c3d9a9		0.126274	No_DR	No_DR	No_DR	1	0	0.126274
e79e10907295		0.482147	No_DR	No_DR	No_DR	1	0	0.482147
e7b5dd5bab1f		0.391805	No_DR	No_DR	No_DR	1	0	0.391805
e81f4a2fbbdc		0.139592	No_DR	No_DR	No_DR	1	0	0.139592
e82232a3c28b		0.538673	No_DR	No_DR	No_DR	1	0	0.538673
e893e86dde94		0.555624	No_DR	No_DR	No_DR	1	0	0.555624
e8ddfc9709ce		0.487796	No_DR	No_DR	No_DR	1	0	0.487796
e8e44b3160e3		0.496553	No_DR	No_DR	No_DR	1	0	0.496553
e907d23cce3d		0.430448	No_DR	No_DR	No_DR	1	0	0.430448
e933923aab15		0.532905	No_DR	No_DR	No_DR	1	0	0.532905
e966850247f4		0.561739	No_DR	No_DR	No_DR	1	0	0.561739
e9678824215d		0.486379	No_DR	No_DR	No_DR	1	0	0.486379
e97ecf4355cb		0.429724	No_DR	No_DR	No_DR	1	0	0.429724
e9ce5bf645ab		0.704702	No_DR	No_DR	No_DR	1	0	0.704702
e9f3c85a2a02		0.290008	No_DR	No_DR	No_DR	1	0	0.290008
e9faf0296643		0.184976	No_DR	No_DR	No_DR	1	0	0.184976
ea4ce9516144		0.258357	No_DR	No_DR	No_DR	1	0	0.258357
ea5c42a78979		0.519089	No_DR	No_DR	No_DR	1	0	0.519089
ea68b58a6e8f		0.506857	No_DR	No_DR	No_DR	1	0	0.506857
ea6a53e54d0f		0.440714	No_DR	No_DR	No_DR	1	0	0.440714
ea7e21bab610		0.367565	No_DR	No_DR	No_DR	1	0	0.367565
ea9c41e1ced0		0.525265	No_DR	No_DR	No_DR	1	0	0.525265
eabc7c716255		0.246126	No_DR	No_DR	No_DR	1	0	0.246126
eabf421f94d0		0.501416	No_DR	No_DR	No_DR	1	0	0.501416
eae70f527755		0.411478	No_DR	No_DR	No_DR	1	0	0.411478
eb050765b323		0.459592	No_DR	No_DR	No_DR	1	0	0.459592
eb175669d789		0.224839	No_DR	No_DR	No_DR	1	0	0.224839
eb6b1f1c09db		0.396209	No_DR	Moderate	Moderate	1	1	-0.603791
ebd96d853918		0.53384	No_DR	No_DR	No_DR	1	0	0.53384
ebf4b22240f4		0.627222	No_DR	No_DR	No_DR	1	0	0.627222
ec01f0862669		0.5467	No_DR	No_DR	No_DR	1	0	0.5467
ec0c9f817b03		0.534173	No_DR	No_DR	No_DR	1	0	0.534173
ec363f48867b		0.302324	No_DR	No_DR	No_DR	1	0	0.302324
ec57cc20d776		0.485739	No_DR	No_DR	No_DR	1	0	0.485739
ec6659926105		0.3981	No_DR	No_DR	No_DR	1	0	0.3981
ec6f1797a25a		0.4598	No_DR	No_DR	No_DR	1	0	0.4598
ecad6845f630		0.274063	No_DR	No_DR	No_DR	1	0	0.274063
ecb4500285ed		0.42612	No_DR	No_DR	No_DR	1	0	0.42612
ed2c52c14493		0.554489	No_DR	No_DR	No_DR	1	0	0.554489
ed2ef440d22c		0.300231	No_DR	No_DR	No_DR	1	0	0.300231
ed3ce1674761		0.55699	No_DR	No_DR	No_DR	1	0	0.55699
ed648b9bcd95		0.387742	No_DR	No_DR	No_DR	1	0	0.387742
ed6bd9293a89		0.679376	No_DR	No_DR	No_DR	1	0	0.679376
eda1d75cbcf0		0.502163	No_DR	No_DR	No_DR	1	0	0.502163
eda29a9d78f3		0.58022	No_DR	No_DR	No_DR	1	0	0.58022
edceb0657d77		0.448996	No_DR	No_DR	No_DR	1	0	0.448996
ee36ca728641		0.339493	No_DR	No_DR	No_DR	1	0	0.339493
ee3f5cf52188		0.398522	No_DR	No_DR	No_DR	1	0	0.398522
ee3fe7809e6a		0.322743	No_DR	No_DR	No_DR	1	0	0.322743
ee77763a6afb		0.387619	No_DR	No_DR	No_DR	1	0	0.387619
eeaea2c5ff34		0.293713	No_DR	No_DR	No_DR	1	0	0.293713
eebd1e195952		0.47527	No_DR	No_DR	No_DR	1	0	0.47527
eedae6b28f96		0.003338	No_DR	No_DR	No_DR	1	0	0.003338
ef247f28004f		0.553876	No_DR	No_DR	No_DR	1	0	0.553876
ef4121e9bb67		0.527889	No_DR	No_DR	No_DR	1	0	0.527889
ef476be214d4		0.384879	No_DR	No_DR	No_DR	1	0	0.384879
ef48780f5d5f		0.298731	No_DR	No_DR	No_DR	1	0	0.298731
ef5155990874		0.605571	No_DR	No_DR	No_DR	1	0	0.605571
ef7eb85b75fc		0.673178	No_DR	No_DR	No_DR	1	0	0.673178
ef81cd8854cb		0.431426	No_DR	No_DR	No_DR	1	0	0.431426
ef8c39eb9157		0.351866	No_DR	No_DR	No_DR	1	0	0.351866
ef99c499d665		0.684146	No_DR	No_DR	No_DR	1	0	0.684146
f002ce614c59		0.306496	No_DR	No_DR	No_DR	1	0	0.306496
f00ce9b9d6f4		0.615053	No_DR	No_DR	No_DR	1	0	0.615053
f02057c41256		0.236881	No_DR	No_DR	No_DR	1	0	0.236881
f0267c42907c		0.498716	No_DR	No_DR	No_DR	1	0	0.498716
f02956bd7c50		0.309958	No_DR	No_DR	No_DR	1	0	0.309958
f02babb3a023		0.572213	No_DR	No_DR	No_DR	1	0	0.572213
f0546a45ef10		0.702949	No_DR	No_DR	No_DR	1	0	0.702949
f066db7a2efe		0.448283	No_DR	Mild	Mild	1	1	-0.551717
f06e7a9df795		0.170125	No_DR	No_DR	No_DR	1	0	0.170125
f0860c21533b		0.190214	No_DR	No_DR	No_DR	1	0	0.190214
f09cfc6a4dbd		0.487535	No_DR	No_DR	No_DR	1	0	0.487535
f09fd9433dff		0.458294	No_DR	No_DR	No_DR	1	0	0.458294
f0a2dc580009		0.324013	No_DR	No_DR	No_DR	1	0	0.324013
f0e1201b5c1f		0.290109	No_DR	No_DR	No_DR	1	0	0.290109
f1979147aad4		0.423018	No_DR	No_DR	No_DR	1	0	0.423018
f1d719c97838		0.445855	No_DR	No_DR	No_DR	1	0	0.445855
f233638e0e90		0.753499	No_DR	No_DR	No_DR	1	0	0.753499
f252046c0fe6		0.542045	No_DR	No_DR	No_DR	1	0	0.542045
f26b02ead915		0.402893	No_DR	No_DR	No_DR	1	0	0.402893
f298b7d05958		0.56707	No_DR	No_DR	No_DR	1	0	0.56707
f2c0b41acd05		0.1846	No_DR	No_DR	No_DR	1	0	0.1846
f2f569a64949		0.554839	No_DR	No_DR	No_DR	1	0	0.554839
f35d80bb1a22		0.561182	No_DR	No_DR	No_DR	1	0	0.561182
f361060eda3e		0.487899	No_DR	No_DR	No_DR	1	0	0.487899
f366fb1cc475		0.455576	No_DR	No_DR	No_DR	1	0	0.455576
f36cb007a1ef		0.708844	No_DR	No_DR	No_DR	1	0	0.708844
f3a4751af42e		0.692863	No_DR	No_DR	No_DR	1	0	0.692863
f3b27ac2d371		0.473012	No_DR	No_DR	No_DR	1	0	0.473012
f3bb996b45ce		0.442727	No_DR	No_DR	No_DR	1	0	0.442727
f42b693a9414		0.372529	No_DR	No_DR	No_DR	1	0	0.372529
f431f2e119d7		0.378771	No_DR	No_DR	No_DR	1	0	0.378771
f451eee2b66b		0.506645	No_DR	No_DR	No_DR	1	0	0.506645
f48241b0c995		0.338084	No_DR	No_DR	No_DR	1	0	0.338084
f4874247ede6		0.393005	No_DR	No_DR	No_DR	1	0	0.393005
f4c7ae514c54		0.531447	No_DR	No_DR	No_DR	1	0	0.531447
f4d3169b468a		0.455243	No_DR	No_DR	No_DR	1	0	0.455243
f4de9620e3f2		0.036085	No_DR	No_DR	No_DR	1	0	0.036085
f4df3d86688d		0.468907	No_DR	No_DR	No_DR	1	0	0.468907
f4e68b61f480		0	No_DR	No_DR	No_DR	1	0	0
f4ea2a2cfbb9		0.565624	No_DR	No_DR	No_DR	1	0	0.565624
f531232ecb55		0.712281	No_DR	No_DR	No_DR	1	0	0.712281
f56ff0440ed1		0.379096	No_DR	No_DR	No_DR	1	0	0.379096
f5733f77273d		0.534905	No_DR	No_DR	No_DR	1	0	0.534905
f57cf3b6f48e		0.352902	No_DR	No_DR	No_DR	1	0	0.352902
f580566e27f5		0.564714	No_DR	No_DR	No_DR	1	0	0.564714
f58cdfa968be		0.302761	No_DR	No_DR	No_DR	1	0	0.302761
f58f0b2fd718		0.562852	No_DR	No_DR	No_DR	1	0	0.562852
f5c953bee7cd		0.497826	No_DR	No_DR	No_DR	1	0	0.497826
f62b8a076833		0.251577	No_DR	No_DR	No_DR	1	0	0.251577
f633c474e8b8		0.73887	No_DR	No_DR	No_DR	1	0	0.73887
f64b6e85f1c9		0.480503	No_DR	No_DR	No_DR	1	0	0.480503
f66c4ee86629		0.127592	No_DR	No_DR	No_DR	1	0	0.127592
f68690db78d3		0.368384	No_DR	No_DR	No_DR	1	0	0.368384
f6d760566a51		0.483832	No_DR	No_DR	No_DR	1	0	0.483832
f7116e7b2f4e		0.486465	No_DR	No_DR	No_DR	1	0	0.486465
f71333204618		0.241774	No_DR	No_DR	No_DR	1	0	0.241774
f71aca5a7dc3		0.065393	No_DR	No_DR	No_DR	1	0	0.065393
f71bea807c96		0.592471	No_DR	No_DR	No_DR	1	0	0.592471
f7508f14dd7b		0.259579	No_DR	No_DR	No_DR	1	0	0.259579
f7735b6d47f7		0.40987	No_DR	No_DR	No_DR	1	0	0.40987
f7defe70afc3		0.190984	No_DR	No_DR	No_DR	1	0	0.190984
f7e9fa75c7c1		0.542463	No_DR	No_DR	No_DR	1	0	0.542463
f819c65b803c		0.048143	No_DR	No_DR	No_DR	1	0	0.048143
f85c78201a50		0.538228	No_DR	No_DR	No_DR	1	0	0.538228
f85fd4fac887		0.170292	No_DR	No_DR	No_DR	1	0	0.170292
f86d1c404acb		0.192529	No_DR	No_DR	No_DR	1	0	0.192529
f8d62557ad0c		0.468539	No_DR	No_DR	No_DR	1	0	0.468539
f8f5942b690e		0.38947	No_DR	No_DR	No_DR	1	0	0.38947
f90f8931a9bc		0.487442	No_DR	No_DR	No_DR	1	0	0.487442
f91cfa82b9d4		0.493786	No_DR	No_DR	No_DR	1	0	0.493786
f952ad2e4356		0.37266	No_DR	No_DR	No_DR	1	0	0.37266
f994a3b07935		0.558931	No_DR	No_DR	No_DR	1	0	0.558931
f9d52509c571		0.587867	No_DR	No_DR	No_DR	1	0	0.587867
f9d8ff3e6592		0.370294	No_DR	No_DR	No_DR	1	0	0.370294
f9e1c439d4c8		0.63128	No_DR	No_DR	No_DR	1	0	0.63128
fa0c87bd75ce		0.545214	No_DR	No_DR	No_DR	1	0	0.545214
fa573163dd8b		0.53183	No_DR	No_DR	No_DR	1	0	0.53183
fa6f3d8bb1d5		0.69159	No_DR	No_DR	No_DR	1	0	0.69159
fa7fa797c650		0.459595	No_DR	No_DR	No_DR	1	0	0.459595
fa9bece586fc		0.248109	No_DR	No_DR	No_DR	1	0	0.248109
fa9f1bc03f21		0.538667	No_DR	No_DR	No_DR	1	0	0.538667
fb1b8771c70a		0.520707	No_DR	No_DR	No_DR	1	0	0.520707
fb767cea406c		0.253385	No_DR	No_DR	No_DR	1	0	0.253385
fb88783de055		0.23836	No_DR	No_DR	No_DR	1	0	0.23836
fb88d23fc5fe		0.585245	No_DR	No_DR	No_DR	1	0	0.585245
fbcbc81cf9be		0.595772	No_DR	No_DR	No_DR	1	0	0.595772
fbdc796290d4		0.519629	No_DR	No_DR	No_DR	1	0	0.519629
fbfa925506f6		0.441023	No_DR	No_DR	No_DR	1	0	0.441023
fc782722a50c		0.515803	No_DR	No_DR	No_DR	1	0	0.515803
fc898dfeb24f		0.220409	No_DR	No_DR	No_DR	1	0	0.220409
fc8fce67fbf8		0.190158	No_DR	No_DR	No_DR	1	0	0.190158
fca1a8738b8a		0.636461	No_DR	No_DR	No_DR	1	0	0.636461
fcc32dffd24d		0.14984	No_DR	No_DR	No_DR	1	0	0.14984
fce73678f650		0.745586	No_DR	No_DR	No_DR	1	0	0.745586
fd079d2e93a2		0.315693	No_DR	No_DR	No_DR	1	0	0.315693
fd0a70082e7c		0.475948	No_DR	No_DR	No_DR	1	0	0.475948
fd4c946c52bf		0.480948	No_DR	No_DR	Moderate	0	1	-0.519052
fd87b6b2e664		0.381711	No_DR	No_DR	No_DR	1	0	0.381711
fdbc252813b1		0.378018	No_DR	No_DR	No_DR	1	0	0.378018
fdc685055659		0.561431	No_DR	No_DR	No_DR	1	0	0.561431
fe06dad6851c		0.305391	No_DR	No_DR	No_DR	1	0	0.305391
fe0e2dee1834		0.457227	No_DR	No_DR	No_DR	1	0	0.457227
fe3b0e50be78		0.286099	No_DR	No_DR	No_DR	1	0	0.286099
fe3f62695b2d		0.379064	No_DR	No_DR	No_DR	1	0	0.379064
febfb20dc311		0.404967	No_DR	No_DR	No_DR	1	0	0.404967
fed5bb685832		0.504015	No_DR	No_DR	No_DR	1	0	0.504015
fefded6bf135		0.307665	No_DR	No_DR	Severe	0	1	-0.692335
ff03f74667df		0.522015	No_DR	No_DR	No_DR	1	0	0.522015
ff1e940105f9		0.497326	No_DR	No_DR	No_DR	1	0	0.497326
ff4832d55461		0.03519	No_DR	No_DR	No_DR	1	0	0.03519
ff4955e76894		0.570884	No_DR	Mild	Moderate	0	1	-0.429116
ff4cd992667b		0.318851	No_DR	No_DR	No_DR	1	0	0.318851
ff59d44a70a7		0.325708	No_DR	No_DR	No_DR	1	0	0.325708
ff631653374e		0.483354	No_DR	No_DR	No_DR	1	0	0.483354
ffc04fed30e6		0.100218	No_DR	No_DR	No_DR	1	0	0.100218
ffd97f8cd5aa		0.51581	No_DR	No_DR	No_DR	1	0	0.51581
						350	16	138.992

## Sheet: NODR_1_alexnet_resnet18
		Activation Maps Consensus		Network 1	Network 2
Immagine	Immagine	Gradcam-Consensus	True_Label	Alexnet_Scratch	Densenet_Scratch	Predict_Consensus	Penalty	Trustability
cfb17a7cc8d4		0.497485	No_DR	No_DR	No_DR	1	0	0.497485
cfdbaef73a8b		0.203139	No_DR	No_DR	No_DR	1	0	0.203139
cfed7c1172ec		0.583282	No_DR	No_DR	No_DR	1	0	0.583282
cff262ed8f4c		0.323204	No_DR	No_DR	No_DR	1	0	0.323204
cffc50047828		0.361943	No_DR	No_DR	No_DR	1	0	0.361943
d02b79fc3200		0.479234	No_DR	No_DR	No_DR	1	0	0.479234
d0926ed2c8e5		0.547442	No_DR	No_DR	No_DR	1	0	0.547442
d160ebef4117		0.191627	No_DR	No_DR	No_DR	1	0	0.191627
d16e39b9d6f0		0.289288	No_DR	No_DR	No_DR	1	0	0.289288
d16e59a2b33a		0.410813	No_DR	No_DR	No_DR	1	0	0.410813
d18f6431ebce		0.506546	No_DR	No_DR	No_DR	1	0	0.506546
d1a60c3b9fe5		0.433904	No_DR	No_DR	No_DR	1	0	0.433904
d1afdb8cf70d		0.595982	No_DR	No_DR	No_DR	1	0	0.595982
d1b279cc02ae		0.50552	No_DR	No_DR	No_DR	1	0	0.50552
d1ca85af57c9		0.492983	No_DR	No_DR	No_DR	1	0	0.492983
d1cf31577a59		0.327619	No_DR	No_DR	No_DR	1	0	0.327619
d1f7ea924a01		0.297426	No_DR	No_DR	No_DR	1	0	0.297426
d1fa0f744620		0.322273	No_DR	No_DR	No_DR	1	0	0.322273
d26bb2ed6e71		0.415459	No_DR	No_DR	No_DR	1	0	0.415459
d26bc6e1230d		0.635734	No_DR	No_DR	No_DR	1	0	0.635734
d27ac9e54901		0.478976	No_DR	No_DR	No_DR	1	0	0.478976
d29b37d110f3		0.420495	No_DR	No_DR	No_DR	1	0	0.420495
d2afca74cbc3		0.424756	No_DR	No_DR	No_DR	1	0	0.424756
d2c5fb82fe5f		0.374852	No_DR	No_DR	No_DR	1	0	0.374852
d2cd47ed2c1d		0.529357	No_DR	No_DR	No_DR	1	0	0.529357
d2d523e9f669		0.448464	No_DR	No_DR	No_DR	1	0	0.448464
d2dc86021c67		0.491703	No_DR	No_DR	No_DR	1	0	0.491703
d2fb715b0c41		0.499886	No_DR	No_DR	No_DR	1	0	0.499886
d30d079e6f9a		0.59617	No_DR	No_DR	No_DR	1	0	0.59617
d332d7b8a26e		0.54932	No_DR	No_DR	No_DR	1	0	0.54932
d38cf0f4a9af		0.593286	No_DR	No_DR	No_DR	1	0	0.593286
d39752cb6e57		0.583689	No_DR	No_DR	No_DR	1	0	0.583689
d3dfd0a2dee6		0.45142	No_DR	No_DR	No_DR	1	0	0.45142
d3e56584a481		0.284835	No_DR	No_DR	No_DR	1	0	0.284835
d436c06f0490		0.711907	No_DR	No_DR	No_DR	1	0	0.711907
d4583e9525dc		0.250461	No_DR	No_DR	No_DR	1	0	0.250461
d4bc001f7224		0.499867	No_DR	No_DR	No_DR	1	0	0.499867
d516f77d4516		0.419179	No_DR	No_DR	No_DR	1	0	0.419179
d51c2153d151		0.281964	No_DR	No_DR	Mild	0	1	-0.718036
d51e5d7484ea		0.518195	No_DR	No_DR	No_DR	1	0	0.518195
d56d32a1d62d		0.397911	No_DR	No_DR	No_DR	1	0	0.397911
d57d1be1bbd1		0.094309	No_DR	No_DR	Moderate	0	1	-0.905691
d5ad3362424c		0.244706	No_DR	No_DR	No_DR	1	0	0.244706
d5c63a8d9e94		0.574973	No_DR	No_DR	No_DR	1	0	0.574973
d6130f2ec903		0.178334	No_DR	No_DR	No_DR	1	0	0.178334
d667af5742f6		0.47705	No_DR	No_DR	No_DR	1	0	0.47705
d6803e467592		0.374797	No_DR	No_DR	No_DR	1	0	0.374797
d69698f838db		0.525373	No_DR	No_DR	No_DR	1	0	0.525373
d6b109c82067		0.561266	No_DR	No_DR	No_DR	1	0	0.561266
d6dbb0820ea5		0.533634	No_DR	No_DR	No_DR	1	0	0.533634
d6df4fe492ec		0.573777	No_DR	No_DR	No_DR	1	0	0.573777
d6f36ec5564a		0.299221	No_DR	No_DR	No_DR	1	0	0.299221
d6f6bdfd8011		0.451548	No_DR	No_DR	No_DR	1	0	0.451548
d7078e8b0349		0.499558	No_DR	No_DR	No_DR	1	0	0.499558
d74ccc796517		0.676725	No_DR	No_DR	No_DR	1	0	0.676725
d774692d9919		0.654329	No_DR	No_DR	No_DR	1	0	0.654329
d78b7401096f		0.181706	No_DR	No_DR	No_DR	1	0	0.181706
d7a01fca9838		0.336256	No_DR	No_DR	No_DR	1	0	0.336256
d7ab5c040294		0.344569	No_DR	No_DR	No_DR	1	0	0.344569
d7ac4a0c9760		0.582838	No_DR	No_DR	No_DR	1	0	0.582838
d7bc00091cfc		0.501806	No_DR	No_DR	No_DR	1	0	0.501806
d7bc62d60e8c		0.282903	No_DR	No_DR	No_DR	1	0	0.282903
d7e5fe5245e0		0.51489	No_DR	No_DR	Moderate	0	1	-0.48511
d807c53c1399		0.472099	No_DR	No_DR	No_DR	1	0	0.472099
d838d5b9f571		0.519728	No_DR	No_DR	No_DR	1	0	0.519728
d844a7252f4e		0.376267	No_DR	No_DR	Moderate	0	1	-0.623733
d865997a6280		0.449257	No_DR	No_DR	No_DR	1	0	0.449257
d866c26d76f0		0.321935	No_DR	No_DR	No_DR	1	0	0.321935
d871895742b1		0	No_DR	No_DR	No_DR	1	0	0
d881c04f01fe		0.584083	No_DR	No_DR	No_DR	1	0	0.584083
d88c4843aec3		0.602401	No_DR	No_DR	No_DR	1	0	0.602401
d8da9de62743		0.577291	No_DR	No_DR	No_DR	1	0	0.577291
d911dd40c63b		0.47515	No_DR	No_DR	No_DR	1	0	0.47515
d91635f380b4		0.310017	No_DR	No_DR	No_DR	1	0	0.310017
d93b61dc8f64		0.513842	No_DR	Moderate	No_DR	0	1	-0.486158
d97911a32918		0.525101	No_DR	No_DR	No_DR	1	0	0.525101
d99b0f7dd9b9		0.480459	No_DR	No_DR	No_DR	1	0	0.480459
d99dd99be001		0.468713	No_DR	No_DR	No_DR	1	0	0.468713
d9ad2a0ec026		0.536714	No_DR	No_DR	No_DR	1	0	0.536714
d9c9b9786da3		0.476163	No_DR	No_DR	No_DR	1	0	0.476163
d9d2631f043c		0.033445	No_DR	No_DR	No_DR	1	0	0.033445
d9e58e4d8689		0.224137	No_DR	Moderate	Mild	0	1	-0.775863
da0a83f074f3		0.431914	No_DR	No_DR	No_DR	1	0	0.431914
da2bdf4236ac		0.372209	No_DR	No_DR	No_DR	1	0	0.372209
da3a2275c850		0.595062	No_DR	No_DR	No_DR	1	0	0.595062
da6389d129aa		0.440947	No_DR	Moderate	Moderate	1	1	-0.559053
da6bbb76d562		0.100797	No_DR	No_DR	No_DR	1	0	0.100797
da9262d9f5d9		0.569257	No_DR	No_DR	No_DR	1	0	0.569257
da949aa67a4f		0.446386	No_DR	No_DR	No_DR	1	0	0.446386
da9574d35b82		0	No_DR	No_DR	No_DR	1	0	0
da9fe02dead3		0.442544	No_DR	No_DR	No_DR	1	0	0.442544
daad7b617f21		0.25328	No_DR	No_DR	No_DR	1	0	0.25328
daff5427c9b2		0.298071	No_DR	No_DR	No_DR	1	0	0.298071
db3cd58aa315		0.462539	No_DR	No_DR	No_DR	1	0	0.462539
db52626d450c		0.546627	No_DR	No_DR	No_DR	1	0	0.546627
db6207e62c7b		0.346501	No_DR	No_DR	No_DR	1	0	0.346501
dc0eea0b68a7		0.18981	No_DR	No_DR	No_DR	1	0	0.18981
dc0f6e5b489b		0.447455	No_DR	No_DR	No_DR	1	0	0.447455
dcc6c0ad5cad		0	No_DR	No_DR	Moderate	0	1	-1
dccdf750c962		0.397955	No_DR	No_DR	No_DR	1	0	0.397955
dce73d90c00c		0.634601	No_DR	No_DR	No_DR	1	0	0.634601
dcf109df1a2b		0.455267	No_DR	No_DR	No_DR	1	0	0.455267
dd02d60bef14		0.385444	No_DR	No_DR	No_DR	1	0	0.385444
dd285d9e97fe		0.543533	No_DR	No_DR	No_DR	1	0	0.543533
dd3176bacfe2		0.090475	No_DR	No_DR	No_DR	1	0	0.090475
dd90c321d7bc		0.243548	No_DR	No_DR	No_DR	1	0	0.243548
ddb222ff7c1d		0.415177	No_DR	No_DR	No_DR	1	0	0.415177
de18071c36e6		0.532077	No_DR	No_DR	No_DR	1	0	0.532077
de2eb5c8aa83		0.368222	No_DR	No_DR	No_DR	1	0	0.368222
de38adaae009		0.202322	No_DR	No_DR	No_DR	1	0	0.202322
de4cdabbce6d		0.490721	No_DR	No_DR	No_DR	1	0	0.490721
de55ed25e0e8		0.361867	No_DR	No_DR	No_DR	1	0	0.361867
de57c9e9fa93		0.135273	No_DR	No_DR	No_DR	1	0	0.135273
de6210f88536		0.587444	No_DR	No_DR	No_DR	1	0	0.587444
de730033c683		0.117372	No_DR	No_DR	No_DR	1	0	0.117372
dea7538bb91a		0.271013	No_DR	No_DR	No_DR	1	0	0.271013
dec5595e6154		0.483309	No_DR	No_DR	No_DR	1	0	0.483309
dee1031a76ae		0.071297	No_DR	No_DR	No_DR	1	0	0.071297
dee31065f8fe		0.617328	No_DR	No_DR	No_DR	1	0	0.617328
df0886f1e76b		0.406075	No_DR	No_DR	No_DR	1	0	0.406075
df6d13d04da1		0.631254	No_DR	No_DR	No_DR	1	0	0.631254
df9cb3729eb1		0.504375	No_DR	No_DR	No_DR	1	0	0.504375
dfc7ec7db0e0		0.568723	No_DR	No_DR	No_DR	1	0	0.568723
dfea19863428		0.23771	No_DR	No_DR	No_DR	1	0	0.23771
e01b7bac822b		0.416927	No_DR	No_DR	No_DR	1	0	0.416927
e0313be77035		0.397509	No_DR	No_DR	No_DR	1	0	0.397509
e03a74e7d74f		0.351601	No_DR	No_DR	No_DR	1	0	0.351601
e04f3c6619a3		0.579802	No_DR	No_DR	No_DR	1	0	0.579802
e067b06fd655		0.707243	No_DR	No_DR	No_DR	1	0	0.707243
e06cccc08c59		0.556049	No_DR	No_DR	No_DR	1	0	0.556049
e087bd4b88f2		0.365398	No_DR	No_DR	No_DR	1	0	0.365398
e0d229db881a		0.580989	No_DR	No_DR	No_DR	1	0	0.580989
e12df54e0d1e		0.575107	No_DR	No_DR	No_DR	1	0	0.575107
e12f9f19d1be		0.455604	No_DR	No_DR	No_DR	1	0	0.455604
e135d7ba9a0e		0.463115	No_DR	No_DR	No_DR	1	0	0.463115
e160a3b19911		0.320082	No_DR	No_DR	No_DR	1	0	0.320082
e16af45285e5		0.50944	No_DR	No_DR	No_DR	1	0	0.50944
e1ab92228e60		0.570582	No_DR	Mild	Mild	1	1	-0.429418
e1b8acb1cea1		0.474293	No_DR	No_DR	No_DR	1	0	0.474293
e1c02f6c3362		0.35111	No_DR	No_DR	No_DR	1	0	0.35111
e1dc02a3dc2a		0.519912	No_DR	No_DR	No_DR	1	0	0.519912
e2265c383348		0.338249	No_DR	No_DR	No_DR	1	0	0.338249
e246cd89e1cc		0.556109	No_DR	No_DR	No_DR	1	0	0.556109
e251bdf05b85		0.146527	No_DR	No_DR	No_DR	1	0	0.146527
e26bcae6c67b		0.232526	No_DR	No_DR	No_DR	1	0	0.232526
e29e54ff921e		0.523354	No_DR	No_DR	No_DR	1	0	0.523354
e2c39ed0c941		0.682767	No_DR	No_DR	No_DR	1	0	0.682767
e2c3b037413b		0.442887	No_DR	Mild	Moderate	0	1	-0.557113
e2ec22b3d07e		0.07689	No_DR	No_DR	No_DR	1	0	0.07689
e30a890600e1		0.023094	No_DR	No_DR	No_DR	1	0	0.023094
e322acd46152		0.275843	No_DR	No_DR	No_DR	1	0	0.275843
e33766353db2		0.37244	No_DR	No_DR	No_DR	1	0	0.37244
e3b47ed5b511		0.647326	No_DR	No_DR	No_DR	1	0	0.647326
e3cd96cb094c		0.378732	No_DR	No_DR	No_DR	1	0	0.378732
e42d9a94a66d		0.307035	No_DR	No_DR	No_DR	1	0	0.307035
e47452069ea1		0.386551	No_DR	No_DR	No_DR	1	0	0.386551
e47770a2e5d1		0.196273	No_DR	No_DR	No_DR	1	0	0.196273
e4a44f9158dc		0.532752	No_DR	No_DR	No_DR	1	0	0.532752
e4ae1ee6aada		0.473261	No_DR	No_DR	No_DR	1	0	0.473261
e4b0df29b96f		0.41813	No_DR	No_DR	No_DR	1	0	0.41813
e4c799738a19		0.427132	No_DR	No_DR	No_DR	1	0	0.427132
e4d3d437b0a8		0.548128	No_DR	No_DR	No_DR	1	0	0.548128
e4dcca36ceb4		0.55788	No_DR	No_DR	No_DR	1	0	0.55788
e50b0174690d		0.652837	No_DR	No_DR	No_DR	1	0	0.652837
e5197d77ec68		0.178835	No_DR	No_DR	No_DR	1	0	0.178835
e529c5757d64		0.383453	No_DR	No_DR	No_DR	1	0	0.383453
e582e56e7942		0.515141	No_DR	No_DR	No_DR	1	0	0.515141
e594c19e2e1d		0.544585	No_DR	No_DR	No_DR	1	0	0.544585
e59c5f345bb0		0.519613	No_DR	No_DR	No_DR	1	0	0.519613
e5de79795c1d		0.212501	No_DR	No_DR	No_DR	1	0	0.212501
e5f332efcbc7		0.270136	No_DR	No_DR	No_DR	1	0	0.270136
e5f73f2855c0		0.638907	No_DR	No_DR	No_DR	1	0	0.638907
e60e4edb3ca9		0.379325	No_DR	No_DR	No_DR	1	0	0.379325
e632e38fd2d4		0.125039	No_DR	No_DR	No_DR	1	0	0.125039
e6552b7432b3		0.650975	No_DR	No_DR	No_DR	1	0	0.650975
e66855a5c583		0.51674	No_DR	No_DR	No_DR	1	0	0.51674
e66ad813a508		0.551864	No_DR	No_DR	No_DR	1	0	0.551864
e68746d426b2		0.309112	No_DR	No_DR	No_DR	1	0	0.309112
e68bdd36e589		0.240414	No_DR	No_DR	No_DR	1	0	0.240414
e69b48516577		0.020472	No_DR	No_DR	No_DR	1	0	0.020472
e6a5e4718873		0.56577	No_DR	No_DR	No_DR	1	0	0.56577
e7291472109b		0.369434	No_DR	No_DR	No_DR	1	0	0.369434
e7578d8dba72		0.39184	No_DR	No_DR	No_DR	1	0	0.39184
e77a93c3d9a9		0.072714	No_DR	No_DR	No_DR	1	0	0.072714
e79e10907295		0.431277	No_DR	No_DR	No_DR	1	0	0.431277
e7b5dd5bab1f		0.400801	No_DR	No_DR	No_DR	1	0	0.400801
e81f4a2fbbdc		0.185182	No_DR	No_DR	No_DR	1	0	0.185182
e82232a3c28b		0.468279	No_DR	No_DR	No_DR	1	0	0.468279
e893e86dde94		0.653071	No_DR	No_DR	No_DR	1	0	0.653071
e8ddfc9709ce		0.625267	No_DR	No_DR	No_DR	1	0	0.625267
e8e44b3160e3		0.536548	No_DR	No_DR	No_DR	1	0	0.536548
e907d23cce3d		0.327396	No_DR	No_DR	No_DR	1	0	0.327396
e933923aab15		0.519483	No_DR	No_DR	No_DR	1	0	0.519483
e966850247f4		0.493816	No_DR	No_DR	No_DR	1	0	0.493816
e9678824215d		0.379392	No_DR	No_DR	No_DR	1	0	0.379392
e97ecf4355cb		0.389971	No_DR	No_DR	No_DR	1	0	0.389971
e9ce5bf645ab		0.691577	No_DR	No_DR	No_DR	1	0	0.691577
e9f3c85a2a02		0.448233	No_DR	No_DR	No_DR	1	0	0.448233
e9faf0296643		0	No_DR	No_DR	No_DR	1	0	0
ea4ce9516144		0.260528	No_DR	No_DR	No_DR	1	0	0.260528
ea5c42a78979		0.615286	No_DR	No_DR	No_DR	1	0	0.615286
ea68b58a6e8f		0.607628	No_DR	No_DR	No_DR	1	0	0.607628
ea6a53e54d0f		0.338959	No_DR	No_DR	No_DR	1	0	0.338959
ea7e21bab610		0.47195	No_DR	No_DR	No_DR	1	0	0.47195
ea9c41e1ced0		0.580967	No_DR	No_DR	No_DR	1	0	0.580967
eabc7c716255		0.362353	No_DR	No_DR	No_DR	1	0	0.362353
eabf421f94d0		0.518666	No_DR	No_DR	No_DR	1	0	0.518666
eae70f527755		0.540315	No_DR	No_DR	No_DR	1	0	0.540315
eb050765b323		0.562613	No_DR	No_DR	No_DR	1	0	0.562613
eb175669d789		0.233893	No_DR	No_DR	No_DR	1	0	0.233893
eb6b1f1c09db		0.358846	No_DR	Moderate	Moderate	1	1	-0.641154
ebd96d853918		0.471801	No_DR	No_DR	No_DR	1	0	0.471801
ebf4b22240f4		0.492384	No_DR	No_DR	No_DR	1	0	0.492384
ec01f0862669		0.572293	No_DR	No_DR	No_DR	1	0	0.572293
ec0c9f817b03		0.495852	No_DR	No_DR	No_DR	1	0	0.495852
ec363f48867b		0.029843	No_DR	No_DR	No_DR	1	0	0.029843
ec57cc20d776		0.341412	No_DR	No_DR	No_DR	1	0	0.341412
ec6659926105		0.412429	No_DR	No_DR	No_DR	1	0	0.412429
ec6f1797a25a		0.438674	No_DR	No_DR	No_DR	1	0	0.438674
ecad6845f630		0.306956	No_DR	No_DR	No_DR	1	0	0.306956
ecb4500285ed		0.485617	No_DR	No_DR	No_DR	1	0	0.485617
ed2c52c14493		0.569854	No_DR	No_DR	No_DR	1	0	0.569854
ed2ef440d22c		0.2259	No_DR	No_DR	No_DR	1	0	0.2259
ed3ce1674761		0.572231	No_DR	No_DR	No_DR	1	0	0.572231
ed648b9bcd95		0.105276	No_DR	No_DR	No_DR	1	0	0.105276
ed6bd9293a89		0.519605	No_DR	No_DR	No_DR	1	0	0.519605
eda1d75cbcf0		0.412714	No_DR	No_DR	No_DR	1	0	0.412714
eda29a9d78f3		0.571935	No_DR	No_DR	No_DR	1	0	0.571935
edceb0657d77		0.373472	No_DR	No_DR	No_DR	1	0	0.373472
ee36ca728641		0.353642	No_DR	No_DR	No_DR	1	0	0.353642
ee3f5cf52188		0.290731	No_DR	No_DR	No_DR	1	0	0.290731
ee3fe7809e6a		0.419341	No_DR	No_DR	No_DR	1	0	0.419341
ee77763a6afb		0.499921	No_DR	No_DR	No_DR	1	0	0.499921
eeaea2c5ff34		0.341306	No_DR	No_DR	No_DR	1	0	0.341306
eebd1e195952		0.290322	No_DR	No_DR	No_DR	1	0	0.290322
eedae6b28f96		0.126429	No_DR	No_DR	No_DR	1	0	0.126429
ef247f28004f		0.44784	No_DR	No_DR	No_DR	1	0	0.44784
ef4121e9bb67		0.602557	No_DR	No_DR	No_DR	1	0	0.602557
ef476be214d4		0.218367	No_DR	No_DR	No_DR	1	0	0.218367
ef48780f5d5f		0.436028	No_DR	No_DR	No_DR	1	0	0.436028
ef5155990874		0.648636	No_DR	No_DR	No_DR	1	0	0.648636
ef7eb85b75fc		0.499071	No_DR	No_DR	No_DR	1	0	0.499071
ef81cd8854cb		0.410058	No_DR	No_DR	No_DR	1	0	0.410058
ef8c39eb9157		0.469187	No_DR	No_DR	No_DR	1	0	0.469187
ef99c499d665		0.555389	No_DR	No_DR	No_DR	1	0	0.555389
f002ce614c59		0.315939	No_DR	No_DR	No_DR	1	0	0.315939
f00ce9b9d6f4		0.479563	No_DR	No_DR	No_DR	1	0	0.479563
f02057c41256		0.271826	No_DR	No_DR	No_DR	1	0	0.271826
f0267c42907c		0.453833	No_DR	No_DR	No_DR	1	0	0.453833
f02956bd7c50		0.505595	No_DR	No_DR	No_DR	1	0	0.505595
f02babb3a023		0.464076	No_DR	No_DR	No_DR	1	0	0.464076
f0546a45ef10		0.628817	No_DR	No_DR	No_DR	1	0	0.628817
f066db7a2efe		0.223261	No_DR	Mild	Mild	1	1	-0.776739
f06e7a9df795		0.200845	No_DR	No_DR	No_DR	1	0	0.200845
f0860c21533b		0.102163	No_DR	No_DR	No_DR	1	0	0.102163
f09cfc6a4dbd		0.501242	No_DR	No_DR	No_DR	1	0	0.501242
f09fd9433dff		0.500647	No_DR	No_DR	No_DR	1	0	0.500647
f0a2dc580009		0.365351	No_DR	No_DR	No_DR	1	0	0.365351
f0e1201b5c1f		0.394441	No_DR	No_DR	No_DR	1	0	0.394441
f1979147aad4		0.226076	No_DR	No_DR	No_DR	1	0	0.226076
f1d719c97838		0.559063	No_DR	No_DR	No_DR	1	0	0.559063
f233638e0e90		0.074271	No_DR	No_DR	No_DR	1	0	0.074271
f252046c0fe6		0.554408	No_DR	No_DR	No_DR	1	0	0.554408
f26b02ead915		0.447822	No_DR	No_DR	No_DR	1	0	0.447822
f298b7d05958		0.624496	No_DR	No_DR	No_DR	1	0	0.624496
f2c0b41acd05		0.29116	No_DR	No_DR	No_DR	1	0	0.29116
f2f569a64949		0.392378	No_DR	No_DR	No_DR	1	0	0.392378
f35d80bb1a22		0.67341	No_DR	No_DR	No_DR	1	0	0.67341
f361060eda3e		0.472627	No_DR	No_DR	No_DR	1	0	0.472627
f366fb1cc475		0.580329	No_DR	No_DR	No_DR	1	0	0.580329
f36cb007a1ef		0.590225	No_DR	No_DR	No_DR	1	0	0.590225
f3a4751af42e		0.591906	No_DR	No_DR	No_DR	1	0	0.591906
f3b27ac2d371		0.465184	No_DR	No_DR	No_DR	1	0	0.465184
f3bb996b45ce		0.584988	No_DR	No_DR	No_DR	1	0	0.584988
f42b693a9414		0.360888	No_DR	No_DR	No_DR	1	0	0.360888
f431f2e119d7		0.285113	No_DR	No_DR	No_DR	1	0	0.285113
f451eee2b66b		0.533485	No_DR	No_DR	No_DR	1	0	0.533485
f48241b0c995		0.450414	No_DR	No_DR	No_DR	1	0	0.450414
f4874247ede6		0.501051	No_DR	No_DR	No_DR	1	0	0.501051
f4c7ae514c54		0.394667	No_DR	No_DR	No_DR	1	0	0.394667
f4d3169b468a		0.538899	No_DR	No_DR	No_DR	1	0	0.538899
f4de9620e3f2		0	No_DR	No_DR	No_DR	1	0	0
f4df3d86688d		0.470602	No_DR	No_DR	No_DR	1	0	0.470602
f4e68b61f480		0.150184	No_DR	No_DR	No_DR	1	0	0.150184
f4ea2a2cfbb9		0.518451	No_DR	No_DR	No_DR	1	0	0.518451
f531232ecb55		0.662718	No_DR	No_DR	No_DR	1	0	0.662718
f56ff0440ed1		0.139024	No_DR	No_DR	No_DR	1	0	0.139024
f5733f77273d		0.520031	No_DR	No_DR	No_DR	1	0	0.520031
f57cf3b6f48e		0.450182	No_DR	No_DR	No_DR	1	0	0.450182
f580566e27f5		0.180263	No_DR	No_DR	No_DR	1	0	0.180263
f58cdfa968be		0.429168	No_DR	No_DR	No_DR	1	0	0.429168
f58f0b2fd718		0.557285	No_DR	No_DR	No_DR	1	0	0.557285
f5c953bee7cd		0.624809	No_DR	No_DR	No_DR	1	0	0.624809
f62b8a076833		0.393456	No_DR	No_DR	No_DR	1	0	0.393456
f633c474e8b8		0.654959	No_DR	No_DR	No_DR	1	0	0.654959
f64b6e85f1c9		0.482094	No_DR	No_DR	No_DR	1	0	0.482094
f66c4ee86629		0.256385	No_DR	No_DR	No_DR	1	0	0.256385
f68690db78d3		0.435674	No_DR	No_DR	No_DR	1	0	0.435674
f6d760566a51		0.504181	No_DR	No_DR	No_DR	1	0	0.504181
f7116e7b2f4e		0.443678	No_DR	No_DR	No_DR	1	0	0.443678
f71333204618		0.264701	No_DR	No_DR	No_DR	1	0	0.264701
f71aca5a7dc3		0.367621	No_DR	No_DR	No_DR	1	0	0.367621
f71bea807c96		0.528006	No_DR	No_DR	No_DR	1	0	0.528006
f7508f14dd7b		0.529007	No_DR	No_DR	No_DR	1	0	0.529007
f7735b6d47f7		0.556852	No_DR	No_DR	No_DR	1	0	0.556852
f7defe70afc3		0.355128	No_DR	No_DR	No_DR	1	0	0.355128
f7e9fa75c7c1		0.451133	No_DR	No_DR	No_DR	1	0	0.451133
f819c65b803c		0.4713	No_DR	No_DR	No_DR	1	0	0.4713
f85c78201a50		0.558806	No_DR	No_DR	No_DR	1	0	0.558806
f85fd4fac887		0.296778	No_DR	No_DR	No_DR	1	0	0.296778
f86d1c404acb		0.291134	No_DR	No_DR	No_DR	1	0	0.291134
f8d62557ad0c		0.152356	No_DR	No_DR	No_DR	1	0	0.152356
f8f5942b690e		0.235604	No_DR	No_DR	No_DR	1	0	0.235604
f90f8931a9bc		0.525899	No_DR	No_DR	No_DR	1	0	0.525899
f91cfa82b9d4		0.426187	No_DR	No_DR	No_DR	1	0	0.426187
f952ad2e4356		0.425424	No_DR	No_DR	No_DR	1	0	0.425424
f994a3b07935		0.710764	No_DR	No_DR	No_DR	1	0	0.710764
f9d52509c571		0.623487	No_DR	No_DR	No_DR	1	0	0.623487
f9d8ff3e6592		0.538875	No_DR	No_DR	No_DR	1	0	0.538875
f9e1c439d4c8		0.545679	No_DR	No_DR	No_DR	1	0	0.545679
fa0c87bd75ce		0.518087	No_DR	No_DR	No_DR	1	0	0.518087
fa573163dd8b		0.403419	No_DR	No_DR	No_DR	1	0	0.403419
fa6f3d8bb1d5		0.576482	No_DR	No_DR	No_DR	1	0	0.576482
fa7fa797c650		0.570083	No_DR	No_DR	No_DR	1	0	0.570083
fa9bece586fc		0.201981	No_DR	No_DR	No_DR	1	0	0.201981
fa9f1bc03f21		0.396895	No_DR	No_DR	No_DR	1	0	0.396895
fb1b8771c70a		0.495999	No_DR	No_DR	No_DR	1	0	0.495999
fb767cea406c		0.000172	No_DR	No_DR	No_DR	1	0	0.000172
fb88783de055		0.423341	No_DR	No_DR	No_DR	1	0	0.423341
fb88d23fc5fe		0.573108	No_DR	No_DR	No_DR	1	0	0.573108
fbcbc81cf9be		0.678179	No_DR	No_DR	No_DR	1	0	0.678179
fbdc796290d4		0.469108	No_DR	No_DR	No_DR	1	0	0.469108
fbfa925506f6		0.348215	No_DR	No_DR	No_DR	1	0	0.348215
fc782722a50c		0.432119	No_DR	No_DR	No_DR	1	0	0.432119
fc898dfeb24f		0.295168	No_DR	No_DR	No_DR	1	0	0.295168
fc8fce67fbf8		0.292232	No_DR	No_DR	No_DR	1	0	0.292232
fca1a8738b8a		0.607868	No_DR	No_DR	No_DR	1	0	0.607868
fcc32dffd24d		0.070325	No_DR	No_DR	No_DR	1	0	0.070325
fce73678f650		0.721269	No_DR	No_DR	No_DR	1	0	0.721269
fd079d2e93a2		0.41772	No_DR	No_DR	No_DR	1	0	0.41772
fd0a70082e7c		0.576761	No_DR	No_DR	No_DR	1	0	0.576761
fd4c946c52bf		0.320036	No_DR	No_DR	No_DR	1	0	0.320036
fd87b6b2e664		0.509305	No_DR	No_DR	No_DR	1	0	0.509305
fdbc252813b1		0.559398	No_DR	No_DR	No_DR	1	0	0.559398
fdc685055659		0.564907	No_DR	No_DR	No_DR	1	0	0.564907
fe06dad6851c		0.339228	No_DR	No_DR	No_DR	1	0	0.339228
fe0e2dee1834		0.433916	No_DR	No_DR	No_DR	1	0	0.433916
fe3b0e50be78		0.07583	No_DR	No_DR	No_DR	1	0	0.07583
fe3f62695b2d		0.486328	No_DR	No_DR	No_DR	1	0	0.486328
febfb20dc311		0.570243	No_DR	No_DR	No_DR	1	0	0.570243
fed5bb685832		0.518585	No_DR	No_DR	No_DR	1	0	0.518585
fefded6bf135		0.172482	No_DR	No_DR	No_DR	1	0	0.172482
ff03f74667df		0.426079	No_DR	No_DR	No_DR	1	0	0.426079
ff1e940105f9		0.593506	No_DR	No_DR	No_DR	1	0	0.593506
ff4832d55461		0.345748	No_DR	No_DR	No_DR	1	0	0.345748
ff4955e76894		0.561657	No_DR	Mild	Mild	1	1	-0.438343
ff4cd992667b		0.32717	No_DR	No_DR	No_DR	1	0	0.32717
ff59d44a70a7		0.472065	No_DR	No_DR	No_DR	1	0	0.472065
ff631653374e		0.557033	No_DR	No_DR	No_DR	1	0	0.557033
ffc04fed30e6		0.523178	No_DR	No_DR	No_DR	1	0	0.523178
ffd97f8cd5aa		0.488605	No_DR	No_DR	No_DR	1	0	0.488605
						353	13	139.435

## Sheet: NODR_1_alexnet_resnet50
		Activation Maps Consensus		Network 1	Network 2
Immagine	Immagine	Gradcam-Consensus	True_Label	Alexnet_Scratch	Densenet_Scratch	Predict_Consensus	Penalty	Trustability
cfb17a7cc8d4		0.000226	No_DR	No_DR	No_DR	1	0	0.000226
cfdbaef73a8b		0.000164	No_DR	No_DR	No_DR	1	0	0.000164
cfed7c1172ec		0.000228	No_DR	No_DR	No_DR	1	0	0.000228
cff262ed8f4c		8.9e-05	No_DR	No_DR	No_DR	1	0	8.9e-05
cffc50047828		0.000676	No_DR	No_DR	No_DR	1	0	0.000676
d02b79fc3200		0.000246	No_DR	No_DR	No_DR	1	0	0.000246
d0926ed2c8e5		0.000213	No_DR	No_DR	No_DR	1	0	0.000213
d160ebef4117		0.000273	No_DR	No_DR	No_DR	1	0	0.000273
d16e39b9d6f0		0.000719	No_DR	No_DR	No_DR	1	0	0.000719
d16e59a2b33a		0.000195	No_DR	No_DR	No_DR	1	0	0.000195
d18f6431ebce		0.000228	No_DR	No_DR	No_DR	1	0	0.000228
d1a60c3b9fe5		0.000302	No_DR	No_DR	No_DR	1	0	0.000302
d1afdb8cf70d		0.000225	No_DR	No_DR	No_DR	1	0	0.000225
d1b279cc02ae		0.000299	No_DR	No_DR	No_DR	1	0	0.000299
d1ca85af57c9		0.000203	No_DR	No_DR	No_DR	1	0	0.000203
d1cf31577a59		0.000112	No_DR	No_DR	No_DR	1	0	0.000112
d1f7ea924a01		0.0007	No_DR	No_DR	No_DR	1	0	0.0007
d1fa0f744620		0.000793	No_DR	No_DR	No_DR	1	0	0.000793
d26bb2ed6e71		0.000724	No_DR	No_DR	No_DR	1	0	0.000724
d26bc6e1230d		0.000166	No_DR	No_DR	No_DR	1	0	0.000166
d27ac9e54901		0.000207	No_DR	No_DR	No_DR	1	0	0.000207
d29b37d110f3		0.000685	No_DR	No_DR	No_DR	1	0	0.000685
d2afca74cbc3		0.000603	No_DR	No_DR	No_DR	1	0	0.000603
d2c5fb82fe5f		0.000553	No_DR	No_DR	No_DR	1	0	0.000553
d2cd47ed2c1d		0.000632	No_DR	No_DR	No_DR	1	0	0.000632
d2d523e9f669		0.000619	No_DR	No_DR	No_DR	1	0	0.000619
d2dc86021c67		0.000315	No_DR	No_DR	No_DR	1	0	0.000315
d2fb715b0c41		0.000289	No_DR	No_DR	No_DR	1	0	0.000289
d30d079e6f9a		0.000326	No_DR	No_DR	No_DR	1	0	0.000326
d332d7b8a26e		0.000134	No_DR	No_DR	No_DR	1	0	0.000134
d38cf0f4a9af		0.000243	No_DR	No_DR	No_DR	1	0	0.000243
d39752cb6e57		0.000188	No_DR	No_DR	No_DR	1	0	0.000188
d3dfd0a2dee6		0.000482	No_DR	No_DR	No_DR	1	0	0.000482
d3e56584a481		0.000797	No_DR	No_DR	No_DR	1	0	0.000797
d436c06f0490		0.000196	No_DR	No_DR	No_DR	1	0	0.000196
d4583e9525dc		0.000886	No_DR	No_DR	No_DR	1	0	0.000886
d4bc001f7224		0.000759	No_DR	No_DR	No_DR	1	0	0.000759
d516f77d4516		0.000673	No_DR	No_DR	No_DR	1	0	0.000673
d51c2153d151		0.000258	No_DR	No_DR	Mild	0	1	-0.999742
d51e5d7484ea		0.000181	No_DR	No_DR	No_DR	1	0	0.000181
d56d32a1d62d		0.000674	No_DR	No_DR	No_DR	1	0	0.000674
d57d1be1bbd1		6.7e-05	No_DR	No_DR	Moderate	0	1	-0.999933
d5ad3362424c		0.0001	No_DR	No_DR	No_DR	1	0	0.0001
d5c63a8d9e94		0.000209	No_DR	No_DR	No_DR	1	0	0.000209
d6130f2ec903		0.000245	No_DR	No_DR	No_DR	1	0	0.000245
d667af5742f6		0.000217	No_DR	No_DR	No_DR	1	0	0.000217
d6803e467592		0.000214	No_DR	No_DR	No_DR	1	0	0.000214
d69698f838db		0.000222	No_DR	No_DR	No_DR	1	0	0.000222
d6b109c82067		0.000214	No_DR	No_DR	No_DR	1	0	0.000214
d6dbb0820ea5		0.000192	No_DR	No_DR	No_DR	1	0	0.000192
d6df4fe492ec		0.000241	No_DR	No_DR	No_DR	1	0	0.000241
d6f36ec5564a		0.000772	No_DR	No_DR	No_DR	1	0	0.000772
d6f6bdfd8011		0.000195	No_DR	No_DR	No_DR	1	0	0.000195
d7078e8b0349		0.0007	No_DR	No_DR	No_DR	1	0	0.0007
d74ccc796517		0.000285	No_DR	No_DR	No_DR	1	0	0.000285
d774692d9919		0.000158	No_DR	No_DR	No_DR	1	0	0.000158
d78b7401096f		9.4e-05	No_DR	No_DR	No_DR	1	0	9.4e-05
d7a01fca9838		0.000673	No_DR	No_DR	No_DR	1	0	0.000673
d7ab5c040294		0.000641	No_DR	No_DR	No_DR	1	0	0.000641
d7ac4a0c9760		0.000171	No_DR	No_DR	No_DR	1	0	0.000171
d7bc00091cfc		0.000219	No_DR	No_DR	No_DR	1	0	0.000219
d7bc62d60e8c		0.000101	No_DR	No_DR	No_DR	1	0	0.000101
d7e5fe5245e0		0.000223	No_DR	No_DR	Moderate	0	1	-0.999777
d807c53c1399		0.00022	No_DR	No_DR	No_DR	1	0	0.00022
d838d5b9f571		0.000292	No_DR	No_DR	No_DR	1	0	0.000292
d844a7252f4e		0.000133	No_DR	No_DR	Moderate	0	1	-0.999867
d865997a6280		0.000639	No_DR	No_DR	No_DR	1	0	0.000639
d866c26d76f0		0.000586	No_DR	No_DR	No_DR	1	0	0.000586
d871895742b1		0.00011	No_DR	No_DR	No_DR	1	0	0.00011
d881c04f01fe		0.000306	No_DR	No_DR	No_DR	1	0	0.000306
d88c4843aec3		0.000221	No_DR	No_DR	No_DR	1	0	0.000221
d8da9de62743		0.000164	No_DR	No_DR	No_DR	1	0	0.000164
d911dd40c63b		0.000246	No_DR	No_DR	No_DR	1	0	0.000246
d91635f380b4		0.000789	No_DR	No_DR	No_DR	1	0	0.000789
d93b61dc8f64		8.2e-05	No_DR	Moderate	No_DR	0	1	-0.999918
d97911a32918		0.000202	No_DR	No_DR	No_DR	1	0	0.000202
d99b0f7dd9b9		0.000167	No_DR	No_DR	No_DR	1	0	0.000167
d99dd99be001		0.000239	No_DR	No_DR	No_DR	1	0	0.000239
d9ad2a0ec026		0.000236	No_DR	No_DR	No_DR	1	0	0.000236
d9c9b9786da3		0.000277	No_DR	No_DR	No_DR	1	0	0.000277
d9d2631f043c		6.9e-05	No_DR	No_DR	No_DR	1	0	6.9e-05
d9e58e4d8689		0.000171	No_DR	Moderate	Mild	0	1	-0.999829
da0a83f074f3		0.000721	No_DR	No_DR	No_DR	1	0	0.000721
da2bdf4236ac		0.000751	No_DR	No_DR	No_DR	1	0	0.000751
da3a2275c850		0.000295	No_DR	No_DR	No_DR	1	0	0.000295
da6389d129aa		0.000157	No_DR	Moderate	Moderate	1	1	-0.999843
da6bbb76d562		5.8e-05	No_DR	No_DR	No_DR	1	0	5.8e-05
da9262d9f5d9		0.000162	No_DR	No_DR	No_DR	1	0	0.000162
da949aa67a4f		0.000469	No_DR	No_DR	No_DR	1	0	0.000469
da9574d35b82		9.1e-05	No_DR	No_DR	No_DR	1	0	9.1e-05
da9fe02dead3		0.000262	No_DR	No_DR	No_DR	1	0	0.000262
daad7b617f21		0.000344	No_DR	No_DR	No_DR	1	0	0.000344
daff5427c9b2		0.000688	No_DR	No_DR	No_DR	1	0	0.000688
db3cd58aa315		0.000688	No_DR	No_DR	No_DR	1	0	0.000688
db52626d450c		0.000288	No_DR	No_DR	No_DR	1	0	0.000288
db6207e62c7b		0.000687	No_DR	No_DR	No_DR	1	0	0.000687
dc0eea0b68a7		4.8e-05	No_DR	No_DR	No_DR	1	0	4.8e-05
dc0f6e5b489b		0.000721	No_DR	No_DR	No_DR	1	0	0.000721
dcc6c0ad5cad		0.000108	No_DR	No_DR	No_DR	1	0	0.000108
dccdf750c962		0.000199	No_DR	No_DR	No_DR	1	0	0.000199
dce73d90c00c		0.000209	No_DR	No_DR	No_DR	1	0	0.000209
dcf109df1a2b		0.000606	No_DR	No_DR	No_DR	1	0	0.000606
dd02d60bef14		0.000876	No_DR	No_DR	No_DR	1	0	0.000876
dd285d9e97fe		0.000178	No_DR	No_DR	No_DR	1	0	0.000178
dd3176bacfe2		0.000192	No_DR	No_DR	No_DR	1	0	0.000192
dd90c321d7bc		0.00056	No_DR	No_DR	No_DR	1	0	0.00056
ddb222ff7c1d		0.000781	No_DR	No_DR	No_DR	1	0	0.000781
de18071c36e6		0.000637	No_DR	No_DR	No_DR	1	0	0.000637
de2eb5c8aa83		0.000472	No_DR	No_DR	No_DR	1	0	0.000472
de38adaae009		7.1e-05	No_DR	No_DR	No_DR	1	0	7.1e-05
de4cdabbce6d		0.000542	No_DR	No_DR	No_DR	1	0	0.000542
de55ed25e0e8		0.000208	No_DR	No_DR	No_DR	1	0	0.000208
de57c9e9fa93		9.5e-05	No_DR	No_DR	No_DR	1	0	9.5e-05
de6210f88536		0.000247	No_DR	No_DR	No_DR	1	0	0.000247
de730033c683		0.000109	No_DR	No_DR	No_DR	1	0	0.000109
dea7538bb91a		0.000325	No_DR	No_DR	No_DR	1	0	0.000325
dec5595e6154		0.000274	No_DR	No_DR	No_DR	1	0	0.000274
dee1031a76ae		0.000224	No_DR	No_DR	No_DR	1	0	0.000224
dee31065f8fe		0.000201	No_DR	No_DR	No_DR	1	0	0.000201
df0886f1e76b		0.000942	No_DR	No_DR	No_DR	1	0	0.000942
df6d13d04da1		0.000141	No_DR	No_DR	No_DR	1	0	0.000141
df9cb3729eb1		0.000577	No_DR	No_DR	No_DR	1	0	0.000577
dfc7ec7db0e0		0.000324	No_DR	No_DR	No_DR	1	0	0.000324
dfea19863428		0.000388	No_DR	No_DR	No_DR	1	0	0.000388
e01b7bac822b		0.0003	No_DR	No_DR	No_DR	1	0	0.0003
e0313be77035		0.000536	No_DR	No_DR	No_DR	1	0	0.000536
e03a74e7d74f		0.000669	No_DR	No_DR	No_DR	1	0	0.000669
e04f3c6619a3		0.000275	No_DR	No_DR	No_DR	1	0	0.000275
e067b06fd655		0.000232	No_DR	No_DR	No_DR	1	0	0.000232
e06cccc08c59		0.000281	No_DR	No_DR	No_DR	1	0	0.000281
e087bd4b88f2		0.000522	No_DR	No_DR	No_DR	1	0	0.000522
e0d229db881a		0.000257	No_DR	No_DR	No_DR	1	0	0.000257
e12df54e0d1e		0.000271	No_DR	No_DR	No_DR	1	0	0.000271
e12f9f19d1be		0.000732	No_DR	No_DR	No_DR	1	0	0.000732
e135d7ba9a0e		0.000164	No_DR	No_DR	No_DR	1	0	0.000164
e160a3b19911		0.000653	No_DR	No_DR	No_DR	1	0	0.000653
e16af45285e5		0.000195	No_DR	No_DR	No_DR	1	0	0.000195
e1ab92228e60		0.000209	No_DR	Mild	Mild	1	1	-0.999791
e1b8acb1cea1		0.000231	No_DR	No_DR	No_DR	1	0	0.000231
e1c02f6c3362		0.000567	No_DR	No_DR	No_DR	1	0	0.000567
e1dc02a3dc2a		0.000175	No_DR	No_DR	No_DR	1	0	0.000175
e2265c383348		0.000667	No_DR	No_DR	No_DR	1	0	0.000667
e246cd89e1cc		0.000239	No_DR	No_DR	No_DR	1	0	0.000239
e251bdf05b85		0.000155	No_DR	No_DR	No_DR	1	0	0.000155
e26bcae6c67b		8.1e-05	No_DR	No_DR	No_DR	1	0	8.1e-05
e29e54ff921e		0.000175	No_DR	No_DR	No_DR	1	0	0.000175
e2c39ed0c941		0.000216	No_DR	No_DR	No_DR	1	0	0.000216
e2c3b037413b		0.000194	No_DR	Mild	Mild	1	1	-0.999806
e2ec22b3d07e		0.000242	No_DR	No_DR	No_DR	1	0	0.000242
e30a890600e1		0.000201	No_DR	No_DR	No_DR	1	0	0.000201
e322acd46152		0.000988	No_DR	No_DR	No_DR	1	0	0.000988
e33766353db2		0.000612	No_DR	No_DR	No_DR	1	0	0.000612
e3b47ed5b511		0.000226	No_DR	No_DR	No_DR	1	0	0.000226
e3cd96cb094c		0.000578	No_DR	No_DR	No_DR	1	0	0.000578
e42d9a94a66d		7.7e-05	No_DR	No_DR	No_DR	1	0	7.7e-05
e47452069ea1		0.000644	No_DR	No_DR	No_DR	1	0	0.000644
e47770a2e5d1		9.6e-05	No_DR	No_DR	No_DR	1	0	9.6e-05
e4a44f9158dc		0.000181	No_DR	No_DR	No_DR	1	0	0.000181
e4ae1ee6aada		0.000159	No_DR	No_DR	No_DR	1	0	0.000159
e4b0df29b96f		0.000192	No_DR	No_DR	No_DR	1	0	0.000192
e4c799738a19		0.000242	No_DR	No_DR	No_DR	1	0	0.000242
e4d3d437b0a8		0.000242	No_DR	No_DR	No_DR	1	0	0.000242
e4dcca36ceb4		0.000194	No_DR	No_DR	No_DR	1	0	0.000194
e50b0174690d		0.000234	No_DR	No_DR	No_DR	1	0	0.000234
e5197d77ec68		0.000162	No_DR	No_DR	No_DR	1	0	0.000162
e529c5757d64		0.000867	No_DR	No_DR	No_DR	1	0	0.000867
e582e56e7942		0.000248	No_DR	No_DR	No_DR	1	0	0.000248
e594c19e2e1d		0.000237	No_DR	No_DR	No_DR	1	0	0.000237
e59c5f345bb0		0.000192	No_DR	No_DR	No_DR	1	0	0.000192
e5de79795c1d		0.000266	No_DR	No_DR	No_DR	1	0	0.000266
e5f332efcbc7		0.000638	No_DR	No_DR	No_DR	1	0	0.000638
e5f73f2855c0		0.000253	No_DR	No_DR	No_DR	1	0	0.000253
e60e4edb3ca9		0.000285	No_DR	No_DR	No_DR	1	0	0.000285
e632e38fd2d4		7.1e-05	No_DR	No_DR	No_DR	1	0	7.1e-05
e6552b7432b3		0.000225	No_DR	No_DR	No_DR	1	0	0.000225
e66855a5c583		0.000253	No_DR	No_DR	No_DR	1	0	0.000253
e66ad813a508		0.000231	No_DR	No_DR	No_DR	1	0	0.000231
e68746d426b2		0.000282	No_DR	No_DR	No_DR	1	0	0.000282
e68bdd36e589		7.5e-05	No_DR	No_DR	No_DR	1	0	7.5e-05
e69b48516577		9e-05	No_DR	No_DR	Moderate	0	1	-0.99991
e6a5e4718873		0.000168	No_DR	No_DR	No_DR	1	0	0.000168
e7291472109b		0.000236	No_DR	No_DR	No_DR	1	0	0.000236
e7578d8dba72		0.000667	No_DR	No_DR	No_DR	1	0	0.000667
e77a93c3d9a9		8.3e-05	No_DR	No_DR	No_DR	1	0	8.3e-05
e79e10907295		0.000279	No_DR	No_DR	No_DR	1	0	0.000279
e7b5dd5bab1f		0.000221	No_DR	No_DR	No_DR	1	0	0.000221
e81f4a2fbbdc		8.8e-05	No_DR	No_DR	No_DR	1	0	8.8e-05
e82232a3c28b		0.000193	No_DR	No_DR	No_DR	1	0	0.000193
e893e86dde94		0.000182	No_DR	No_DR	No_DR	1	0	0.000182
e8ddfc9709ce		0.000186	No_DR	No_DR	No_DR	1	0	0.000186
e8e44b3160e3		0.000241	No_DR	No_DR	No_DR	1	0	0.000241
e907d23cce3d		0.000732	No_DR	No_DR	No_DR	1	0	0.000732
e933923aab15		0.000171	No_DR	No_DR	No_DR	1	0	0.000171
e966850247f4		0.00031	No_DR	No_DR	No_DR	1	0	0.00031
e9678824215d		0.000233	No_DR	No_DR	No_DR	1	0	0.000233
e97ecf4355cb		0.000545	No_DR	No_DR	No_DR	1	0	0.000545
e9ce5bf645ab		0.000246	No_DR	No_DR	No_DR	1	0	0.000246
e9f3c85a2a02		0.000191	No_DR	No_DR	No_DR	1	0	0.000191
e9faf0296643		4.9e-05	No_DR	No_DR	No_DR	1	0	4.9e-05
ea4ce9516144		0.000853	No_DR	No_DR	No_DR	1	0	0.000853
ea5c42a78979		0.00022	No_DR	No_DR	No_DR	1	0	0.00022
ea68b58a6e8f		0.000193	No_DR	No_DR	No_DR	1	0	0.000193
ea6a53e54d0f		0.000207	No_DR	No_DR	No_DR	1	0	0.000207
ea7e21bab610		0.000217	No_DR	No_DR	No_DR	1	0	0.000217
ea9c41e1ced0		0.000244	No_DR	No_DR	No_DR	1	0	0.000244
eabc7c716255		0.000221	No_DR	No_DR	No_DR	1	0	0.000221
eabf421f94d0		0.000212	No_DR	No_DR	No_DR	1	0	0.000212
eae70f527755		0.000159	No_DR	No_DR	No_DR	1	0	0.000159
eb050765b323		0.00026	No_DR	No_DR	No_DR	1	0	0.00026
eb175669d789		0.000293	No_DR	No_DR	No_DR	1	0	0.000293
eb6b1f1c09db		0.000128	No_DR	Moderate	Moderate	1	1	-0.999872
ebd96d853918		0.00021	No_DR	No_DR	No_DR	1	0	0.00021
ebf4b22240f4		0.000183	No_DR	No_DR	No_DR	1	0	0.000183
ec01f0862669		0.000214	No_DR	No_DR	No_DR	1	0	0.000214
ec0c9f817b03		0.000258	No_DR	No_DR	No_DR	1	0	0.000258
ec363f48867b		9.4e-05	No_DR	No_DR	No_DR	1	0	9.4e-05
ec57cc20d776		0.001153	No_DR	No_DR	No_DR	1	0	0.001153
ec6659926105		0.000216	No_DR	No_DR	No_DR	1	0	0.000216
ec6f1797a25a		0.000172	No_DR	No_DR	No_DR	1	0	0.000172
ecad6845f630		5.2e-05	No_DR	No_DR	No_DR	1	0	5.2e-05
ecb4500285ed		0.000629	No_DR	No_DR	No_DR	1	0	0.000629
ed2c52c14493		0.000258	No_DR	No_DR	No_DR	1	0	0.000258
ed2ef440d22c		0.000237	No_DR	No_DR	No_DR	1	0	0.000237
ed3ce1674761		0.000196	No_DR	No_DR	No_DR	1	0	0.000196
ed648b9bcd95		0.00031	No_DR	No_DR	No_DR	1	0	0.00031
ed6bd9293a89		0.000247	No_DR	No_DR	No_DR	1	0	0.000247
eda1d75cbcf0		0.000254	No_DR	No_DR	No_DR	1	0	0.000254
eda29a9d78f3		0.000314	No_DR	No_DR	No_DR	1	0	0.000314
edceb0657d77		0.000595	No_DR	No_DR	No_DR	1	0	0.000595
ee36ca728641		0.000888	No_DR	No_DR	No_DR	1	0	0.000888
ee3f5cf52188		0.000682	No_DR	No_DR	No_DR	1	0	0.000682
ee3fe7809e6a		0.000802	No_DR	No_DR	No_DR	1	0	0.000802
ee77763a6afb		0.000589	No_DR	No_DR	No_DR	1	0	0.000589
eeaea2c5ff34		0.000575	No_DR	No_DR	No_DR	1	0	0.000575
eebd1e195952		0.000764	No_DR	No_DR	No_DR	1	0	0.000764
eedae6b28f96		8.4e-05	No_DR	No_DR	No_DR	1	0	8.4e-05
ef247f28004f		0.000713	No_DR	No_DR	No_DR	1	0	0.000713
ef4121e9bb67		0.000226	No_DR	No_DR	No_DR	1	0	0.000226
ef476be214d4		0.000979	No_DR	No_DR	No_DR	1	0	0.000979
ef48780f5d5f		0.000242	No_DR	No_DR	No_DR	1	0	0.000242
ef5155990874		0.000171	No_DR	No_DR	No_DR	1	0	0.000171
ef7eb85b75fc		0.000219	No_DR	No_DR	No_DR	1	0	0.000219
ef81cd8854cb		0.000184	No_DR	No_DR	No_DR	1	0	0.000184
ef8c39eb9157		0.000547	No_DR	No_DR	No_DR	1	0	0.000547
ef99c499d665		0.000265	No_DR	No_DR	No_DR	1	0	0.000265
f002ce614c59		6.4e-05	No_DR	No_DR	No_DR	1	0	6.4e-05
f00ce9b9d6f4		0.000186	No_DR	No_DR	No_DR	1	0	0.000186
f02057c41256		8.5e-05	No_DR	No_DR	No_DR	1	0	8.5e-05
f0267c42907c		0.000682	No_DR	No_DR	No_DR	1	0	0.000682
f02956bd7c50		0.00078	No_DR	No_DR	No_DR	1	0	0.00078
f02babb3a023		0.000166	No_DR	No_DR	No_DR	1	0	0.000166
f0546a45ef10		0.000218	No_DR	No_DR	No_DR	1	0	0.000218
f066db7a2efe		0.000182	No_DR	Mild	Mild	1	1	-0.999818
f06e7a9df795		9e-05	No_DR	No_DR	No_DR	1	0	9e-05
f0860c21533b		0.000119	No_DR	No_DR	No_DR	1	0	0.000119
f09cfc6a4dbd		0.000139	No_DR	No_DR	No_DR	1	0	0.000139
f09fd9433dff		0.000206	No_DR	No_DR	No_DR	1	0	0.000206
f0a2dc580009		0.000632	No_DR	No_DR	No_DR	1	0	0.000632
f0e1201b5c1f		0.000618	No_DR	No_DR	No_DR	1	0	0.000618
f1979147aad4		0.000122	No_DR	No_DR	No_DR	1	0	0.000122
f1d719c97838		0.000207	No_DR	No_DR	No_DR	1	0	0.000207
f233638e0e90		0.000259	No_DR	No_DR	No_DR	1	0	0.000259
f252046c0fe6		0.000315	No_DR	No_DR	No_DR	1	0	0.000315
f26b02ead915		0.000686	No_DR	No_DR	No_DR	1	0	0.000686
f298b7d05958		0.000255	No_DR	No_DR	No_DR	1	0	0.000255
f2c0b41acd05		0.000855	No_DR	No_DR	No_DR	1	0	0.000855
f2f569a64949		0.000926	No_DR	No_DR	No_DR	1	0	0.000926
f35d80bb1a22		0.000252	No_DR	No_DR	No_DR	1	0	0.000252
f361060eda3e		0.000219	No_DR	No_DR	No_DR	1	0	0.000219
f366fb1cc475		0.000191	No_DR	No_DR	No_DR	1	0	0.000191
f36cb007a1ef		0.000197	No_DR	No_DR	No_DR	1	0	0.000197
f3a4751af42e		0.000277	No_DR	No_DR	No_DR	1	0	0.000277
f3b27ac2d371		0.000197	No_DR	No_DR	No_DR	1	0	0.000197
f3bb996b45ce		0.000214	No_DR	No_DR	No_DR	1	0	0.000214
f42b693a9414		0.000786	No_DR	No_DR	No_DR	1	0	0.000786
f431f2e119d7		0.000519	No_DR	No_DR	No_DR	1	0	0.000519
f451eee2b66b		0.0002	No_DR	No_DR	No_DR	1	0	0.0002
f48241b0c995		0.000412	No_DR	No_DR	No_DR	1	0	0.000412
f4874247ede6		0.000986	No_DR	No_DR	No_DR	1	0	0.000986
f4c7ae514c54		0.000701	No_DR	No_DR	No_DR	1	0	0.000701
f4d3169b468a		0.000174	No_DR	No_DR	No_DR	1	0	0.000174
f4de9620e3f2		7.7e-05	No_DR	No_DR	No_DR	1	0	7.7e-05
f4df3d86688d		0.000198	No_DR	No_DR	No_DR	1	0	0.000198
f4e68b61f480		7e-05	No_DR	No_DR	No_DR	1	0	7e-05
f4ea2a2cfbb9		0.000264	No_DR	No_DR	No_DR	1	0	0.000264
f531232ecb55		0.000319	No_DR	No_DR	No_DR	1	0	0.000319
f56ff0440ed1		6.3e-05	No_DR	No_DR	No_DR	1	0	6.3e-05
f5733f77273d		0.000211	No_DR	No_DR	No_DR	1	0	0.000211
f57cf3b6f48e		0.000628	No_DR	No_DR	No_DR	1	0	0.000628
f580566e27f5		0.000336	No_DR	No_DR	No_DR	1	0	0.000336
f58cdfa968be		0.000744	No_DR	No_DR	No_DR	1	0	0.000744
f58f0b2fd718		0.000231	No_DR	No_DR	No_DR	1	0	0.000231
f5c953bee7cd		0.000234	No_DR	No_DR	No_DR	1	0	0.000234
f62b8a076833		0.000913	No_DR	No_DR	No_DR	1	0	0.000913
f633c474e8b8		0.000214	No_DR	No_DR	No_DR	1	0	0.000214
f64b6e85f1c9		0.000162	No_DR	No_DR	No_DR	1	0	0.000162
f66c4ee86629		9.9e-05	No_DR	No_DR	No_DR	1	0	9.9e-05
f68690db78d3		0.00061	No_DR	No_DR	No_DR	1	0	0.00061
f6d760566a51		0.000233	No_DR	No_DR	No_DR	1	0	0.000233
f7116e7b2f4e		0.000253	No_DR	No_DR	No_DR	1	0	0.000253
f71333204618		9.6e-05	No_DR	No_DR	No_DR	1	0	9.6e-05
f71aca5a7dc3		0.000681	No_DR	No_DR	No_DR	1	0	0.000681
f71bea807c96		0.000244	No_DR	No_DR	No_DR	1	0	0.000244
f7508f14dd7b		0.000826	No_DR	No_DR	No_DR	1	0	0.000826
f7735b6d47f7		0.000164	No_DR	No_DR	No_DR	1	0	0.000164
f7defe70afc3		9.9e-05	No_DR	No_DR	No_DR	1	0	9.9e-05
f7e9fa75c7c1		0.000214	No_DR	No_DR	No_DR	1	0	0.000214
f819c65b803c		0.001375	No_DR	No_DR	No_DR	1	0	0.001375
f85c78201a50		0.000259	No_DR	No_DR	No_DR	1	0	0.000259
f85fd4fac887		5.9e-05	No_DR	No_DR	No_DR	1	0	5.9e-05
f86d1c404acb		0.00083	No_DR	No_DR	No_DR	1	0	0.00083
f8d62557ad0c		0.000214	No_DR	No_DR	No_DR	1	0	0.000214
f8f5942b690e		0.000349	No_DR	No_DR	No_DR	1	0	0.000349
f90f8931a9bc		0.000158	No_DR	No_DR	No_DR	1	0	0.000158
f91cfa82b9d4		0.000603	No_DR	No_DR	No_DR	1	0	0.000603
f952ad2e4356		0.00064	No_DR	No_DR	No_DR	1	0	0.00064
f994a3b07935		0.000195	No_DR	No_DR	No_DR	1	0	0.000195
f9d52509c571		0.000293	No_DR	No_DR	No_DR	1	0	0.000293
f9d8ff3e6592		0.000651	No_DR	No_DR	No_DR	1	0	0.000651
f9e1c439d4c8		0.000138	No_DR	No_DR	No_DR	1	0	0.000138
fa0c87bd75ce		0.00021	No_DR	No_DR	No_DR	1	0	0.00021
fa573163dd8b		0.000191	No_DR	No_DR	No_DR	1	0	0.000191
fa6f3d8bb1d5		0.000199	No_DR	No_DR	No_DR	1	0	0.000199
fa7fa797c650		0.000184	No_DR	No_DR	No_DR	1	0	0.000184
fa9bece586fc		7.2e-05	No_DR	No_DR	No_DR	1	0	7.2e-05
fa9f1bc03f21		0.00029	No_DR	No_DR	No_DR	1	0	0.00029
fb1b8771c70a		0.000214	No_DR	No_DR	No_DR	1	0	0.000214
fb767cea406c		0.000308	No_DR	No_DR	No_DR	1	0	0.000308
fb88783de055		0.000191	No_DR	No_DR	No_DR	1	0	0.000191
fb88d23fc5fe		0.00034	No_DR	No_DR	No_DR	1	0	0.00034
fbcbc81cf9be		0.000229	No_DR	No_DR	No_DR	1	0	0.000229
fbdc796290d4		0.00032	No_DR	No_DR	No_DR	1	0	0.00032
fbfa925506f6		0.000943	No_DR	No_DR	No_DR	1	0	0.000943
fc782722a50c		0.000249	No_DR	No_DR	No_DR	1	0	0.000249
fc898dfeb24f		0.001008	No_DR	No_DR	No_DR	1	0	0.001008
fc8fce67fbf8		0.001088	No_DR	No_DR	No_DR	1	0	0.001088
fca1a8738b8a		0.0002	No_DR	No_DR	No_DR	1	0	0.0002
fcc32dffd24d		6.1e-05	No_DR	No_DR	No_DR	1	0	6.1e-05
fce73678f650		0.000245	No_DR	No_DR	No_DR	1	0	0.000245
fd079d2e93a2		0.000207	No_DR	No_DR	No_DR	1	0	0.000207
fd0a70082e7c		0.000251	No_DR	No_DR	No_DR	1	0	0.000251
fd4c946c52bf		0.000348	No_DR	No_DR	No_DR	1	0	0.000348
fd87b6b2e664		0.000181	No_DR	No_DR	No_DR	1	0	0.000181
fdbc252813b1		0.000667	No_DR	No_DR	No_DR	1	0	0.000667
fdc685055659		0.00019	No_DR	No_DR	No_DR	1	0	0.00019
fe06dad6851c		0.00091	No_DR	No_DR	No_DR	1	0	0.00091
fe0e2dee1834		0.000635	No_DR	No_DR	No_DR	1	0	0.000635
fe3b0e50be78		0.000152	No_DR	No_DR	No_DR	1	0	0.000152
fe3f62695b2d		0.000216	No_DR	No_DR	No_DR	1	0	0.000216
febfb20dc311		0.00015	No_DR	No_DR	No_DR	1	0	0.00015
fed5bb685832		0.000185	No_DR	No_DR	No_DR	1	0	0.000185
fefded6bf135		0.000118	No_DR	No_DR	No_DR	1	0	0.000118
ff03f74667df		0.000653	No_DR	No_DR	No_DR	1	0	0.000653
ff1e940105f9		0.000236	No_DR	No_DR	No_DR	1	0	0.000236
ff4832d55461		0.00067	No_DR	No_DR	No_DR	1	0	0.00067
ff4955e76894		0.000173	No_DR	Mild	Moderate	0	1	-0.999827
ff4cd992667b		9.4e-05	No_DR	No_DR	Mild	0	1	-0.999906
ff59d44a70a7		0.000163	No_DR	No_DR	No_DR	1	0	0.000163
ff631653374e		0.000214	No_DR	No_DR	No_DR	1	0	0.000214
ffc04fed30e6		0.000735	No_DR	No_DR	No_DR	1	0	0.000735
ffd97f8cd5aa		0.000182	No_DR	No_DR	No_DR	1	0	0.000182
						352	14	-13.8761

[truncated: 160 more sheets: NODR_1_alexnet_shufflenet, NODR_1_alexnet_vgg16, NODR_1_alexnet_vgg19, NODR_1_alexnet_xception, NODR_1_densenet_alexnet, NODR_1_densenet_densenet, NODR_1_densenet_efficientnetb0, NODR_1_densenet_googlenet, NODR_1_densenet_inceptionresnet, NODR_1_densenet_inceptionv3, NODR_1_densenet_mobilenetv2, NODR_1_densenet_resnet18, NODR_1_densenet_resnet50, NODR_1_densenet_shufflenet, NODR_1_densenet_vgg16, NODR_1_densenet_vgg19, NODR_1_densenet_xception, NODR_1_efficientnetb0_alexnet, NODR_1_efficientnetb0_densenet, NODR_1_efficientnetb0_efficient …]
