# Supplementary material for: Towards trustworthy digital health: reliability of uncertainty-aware convolutional neural networks
Source: PeerJ journal article supplement (doi:10.7717/peerj-cs.3414), 2026-01-28
Supplement: trustworthinessmain.zip [file Diabetic_Retinopathy_Proliferate.xlsx]

## Sheet: Proliferate_trust
	Network 1	Network 2	Class	Affidabilità	n1_TPR	n1_TNR	n1_FPR	n1_FNR	n2_TPR	n2_TNR	n2_FPR	n2_FNR
	Alexnet	Alexnet	Proliferate	0.644068
	Alexnet	Densenet	Proliferate	-0.270572
	Alexnet	Efficientnetb0	Proliferate	-0.183309
	Alexnet	Googlenet	Proliferate	-0.451263
	Alexnet	inceptionresnetv2	Proliferate	-0.864213
	Alexnet	inceptionv3	Proliferate	-0.255114
	Alexnet	mobilenetv2	Proliferate	-0.375338
	Alexnet	resnet18	Proliferate	-0.451434
	Alexnet	resnet50	Proliferate	-0.813365
	Alexnet	shufflenet	Proliferate	-0.531967
	Alexnet	vgg16	Proliferate	-0.423535
	Alexnet	vgg19	Proliferate	0.0100084
	Alexnet	xception	Proliferate	-0.357543
	Densenet	Alexnet	Proliferate	-0.270572
	Densenet	Densenet	Proliferate	0.338983
	Densenet	Efficientnetb0	Proliferate	-0.214032
	Densenet	Googlenet	Proliferate	-0.485705
	Densenet	inceptionresnetv2	Proliferate	-0.898117
	Densenet	inceptionv3	Proliferate	-0.326655
	Densenet	mobilenetv2	Proliferate	-0.392906
	Densenet	resnet18	Proliferate	-0.405728
	Densenet	resnet50	Proliferate	-0.83032
	Densenet	shufflenet	Proliferate	-0.500527
	Densenet	vgg16	Proliferate	-0.694727
	Densenet	vgg19	Proliferate	-0.205448
	Densenet	xception	Proliferate	-0.344286
	Efficientnetb0	Alexnet	Proliferate	-0.183309
	Efficientnetb0	Densenet	Proliferate	-0.214032
	Efficientnetb0	Efficientnetb0	Proliferate	0.440678
	Efficientnetb0	Googlenet	Proliferate	-0.4601
	Efficientnetb0	inceptionresnetv2	Proliferate	-0.881074
	Efficientnetb0	inceptionv3	Proliferate	-0.209741
	Efficientnetb0	mobilenetv2	Proliferate	-0.321555
	Efficientnetb0	resnet18	Proliferate	-0.384078
	Efficientnetb0	resnet50	Proliferate	-0.847176
	Efficientnetb0	shufflenet	Proliferate	-0.433353
	Efficientnetb0	vgg16	Proliferate	-0.592938
	Efficientnetb0	vgg19	Proliferate	0.00929385
	Efficientnetb0	xception	Proliferate	-0.321011
	GoogleNet	Alexnet	Proliferate	-0.451263
	GoogleNet	densenet	Proliferate	-0.485705
	GoogleNet	Efficientnetb0	Proliferate	-0.4601
	GoogleNet	Googlenet	Proliferate	0.152542
	GoogleNet	Inceptionresnetv2	Proliferate	-0.96596
	GoogleNet	inceptionv3	Proliferate	-0.498006
	GoogleNet	Mobilenetv2	Proliferate	-0.551387
	GoogleNet	resnet18	Proliferate	-0.584393
	GoogleNet	resnet50	Proliferate	-0.932061
	GoogleNet	Shufflenet	Proliferate	-0.575797
	GoogleNet	vgg16	Proliferate	-0.847316
	GoogleNet	vgg19	Proliferate	-0.458309
	GoogleNet	xception	Proliferate	-0.515797
	Inceptionresnetv2	Alexnet	Proliferate	-0.864213
	Inceptionresnetv2	Densenet	Proliferate	-0.898117
	Inceptionresnetv2	Efficientnetb0	Proliferate	-0.881074
	Inceptionresnetv2	Googlenet	Proliferate	-0.96596
	Inceptionresnetv2	inceptionresnetv2	Proliferate	0.152542
	Inceptionresnetv2	inceptionv3	Proliferate	-0.898048
	Inceptionresnetv2	mobilenetv2	Proliferate	-0.94891
	Inceptionresnetv2	resnet18	Proliferate	-0.915056
	Inceptionresnetv2	resnet50	Proliferate	0.0847458
	Inceptionresnetv2	shufflenet	Proliferate	-0.965903
	Inceptionresnetv2	vgg16	Proliferate	0.135593
	Inceptionresnetv2	vgg19	Proliferate	-0.864189
	Inceptionresnetv2	xception	Proliferate	-0.931958
	inceptionv3	Alexnet	Proliferate	-0.255114
	inceptionv3	Densenet	Proliferate	-0.326655
	inceptionv3	Efficientnetb0	Proliferate	-0.209741
	inceptionv3	Googlenet	Proliferate	-0.498006
	inceptionv3	inceptionresnetv2	Proliferate	-0.898048
	inceptionv3	inceptionv3	Proliferate	0.40678
	inceptionv3	mobilenetv2	Proliferate	-0.380905
	inceptionv3	resnet18	Proliferate	-0.380148
	inceptionv3	resnet50	Proliferate	-0.830252
	inceptionv3	shufflenet	Proliferate	-0.531242
	inceptionv3	vgg16	Proliferate	-0.643811
	inceptionv3	vgg19	Proliferate	-0.17719
	inceptionv3	xception	Proliferate	-0.304271
	mobilenetv2	Alexnet	Proliferate	-0.375338
	mobilenetv2	Densenet	Proliferate	-0.392906
	mobilenetv2	Efficientnetb0	Proliferate	-0.321555
	mobilenetv2	Googlenet	Proliferate	-0.551387
	mobilenetv2	inceptionresnetv2	Proliferate	-0.94891
	mobilenetv2	inceptionv3	Proliferate	-0.380905
	mobilenetv2	mobilenetv2	Proliferate	0.271186
	mobilenetv2	resnet18	Proliferate	-0.46777
	mobilenetv2	resnet50	Proliferate	-0.915012
	mobilenetv2	shufflenet	Proliferate	-0.48248
	mobilenetv2	vgg16	Proliferate	-0.76247
	mobilenetv2	vgg19	Proliferate	-0.221953
	mobilenetv2	xception	Proliferate	-0.387774
	resnet18	Alexnet	Proliferate	-0.451434
	resnet18	Densenet	Proliferate	-0.405728
	resnet18	Efficientnetb0	Proliferate	-0.384078
	resnet18	Googlenet	Proliferate	-0.584393
	resnet18	inceptionresnetv2	Proliferate	-0.915056
	resnet18	inceptionv3	Proliferate	-0.380148
	resnet18	mobilenetv2	Proliferate	-0.46777
	resnet18	resnet18	Proliferate	0.237288
	resnet18	resnet50	Proliferate	-0.847259
	resnet18	shufflenet	Proliferate	-0.54574
	resnet18	vgg16	Proliferate	-0.779463
	resnet18	vgg19	Proliferate	-0.366731
	resnet18	xception	Proliferate	-0.39296
	resnet50	Alexnet	Proliferate	-0.813365
	resnet50	Densenet	Proliferate	-0.83032
	resnet50	Efficientnetb0	Proliferate	-0.847176
	resnet50	Googlenet	Proliferate	-0.932061
	resnet50	inceptionresnetv2	Proliferate	0.0847458
	resnet50	inceptionv3	Proliferate	-0.830252
	resnet50	mobilenetv2	Proliferate	-0.915012
	resnet50	resnet18	Proliferate	-0.847259
	resnet50	resnet50	Proliferate	0.237288
	resnet50	shufflenet	Proliferate	-0.965903
	resnet50	vgg16	Proliferate	0.237288
	resnet50	vgg19	Proliferate	-0.779444
	resnet50	exception	Proliferate	-0.88111
	Shufflenet	Alexnet	Proliferate	-0.531967
	Shufflenet	Densenet	Proliferate	-0.500527
	Shufflenet	efficientnetb0	Proliferate	-0.433353
	Shufflenet	googlenet	Proliferate	-0.575797
	Shufflenet	inceptionresnetv2	Proliferate	-0.965903
	Shufflenet	inceptionv3	Proliferate	-0.531242
	Shufflenet	mobilenetv2	Proliferate	-0.48248
	Shufflenet	resnet18	Proliferate	-0.54574
	Shufflenet	resnet50	Proliferate	-0.965903
	Shufflenet	shufflenet	Proliferate	0.0677966
	Shufflenet	vgg16	Proliferate	-0.932004
	Shufflenet	vgg19	Proliferate	-0.421765
	Shufflenet	xception	Proliferate	-0.480304
	vgg16	Alexnet	Proliferate	-0.423535
	vgg16	Densenet	Proliferate	-0.694727
	vgg16	efficientnetb0	Proliferate	-0.592938
	vgg16	googlenet	Proliferate	-0.847316
	vgg16	inceptionresnetv2	Proliferate	0.135593
	vgg16	inceptionv3	Proliferate	-0.643811
	vgg16	mobilenetv2	Proliferate	-0.76247
	vgg16	resnet18	Proliferate	-0.779463
	vgg16	resnet50	Proliferate	0.237288
	vgg16	shufflenet	Proliferate	-0.932004
	vgg16	vgg16	Proliferate	0.79661
	vgg16	vgg19	Proliferate	-0.237071
	vgg16	xception	Proliferate	-0.711619
	vgg19	Alexnet	Proliferate	0.0100084
	vgg19	Densenet	Proliferate	-0.205448
	vgg19	efficientnetb0	Proliferate	0.00929385
	vgg19	googlenet	Proliferate	-0.458309
	vgg19	inceptionresnetv2	Proliferate	-0.864189
	vgg19	inceptionv3	Proliferate	-0.17719
	vgg19	mobilenetv2	Proliferate	-0.221953
	vgg19	resnet18	Proliferate	-0.366731
	vgg19	resnet50	Proliferate	-0.779444
	vgg19	shufflenet	Proliferate	-0.421765
	vgg19	vgg16	Proliferate	-0.237071
	vgg19	vgg19	Proliferate	0.830508
	vgg19	xception	Proliferate	-0.237723
	xception	Alexnet	Proliferate	-0.357543
	xception	Densenet	Proliferate	-0.344286
	xception	efficientnetb0	Proliferate	-0.321011
	xception	googlenet	Proliferate	-0.515797
	xception	inceptionresnetv2	Proliferate	-0.931958
	xception	inceptionv3	Proliferate	-0.304271
	xception	mobilenetv2	Proliferate	-0.387774
	xception	resnet18	Proliferate	-0.39296
	xception	resnet50	Proliferate	-0.88111
	xception	shufflenet	Proliferate	-0.480304
	xception	vgg16	Proliferate	-0.711619
	xception	vgg19	Proliferate	-0.237723
	xception	xception	Proliferate	0.288136
			Trustability CNN verso Proliferate		-0.453674

## Sheet: Proliferate_1_alexnet_alexnet
		Activation Maps Consensus		Network 1	Network 2
Immagine	Immagine	Gradcam-Consensus	True_Label	Alexnet_Scratch	Densenet_Scratch	Predict_Consensus	Penalty	Trustability
cf1b9d26d38d		1	Proliferate_DR	Proliferate_DR	Proliferate_DR	1	0	1
d0b132d2c7ec		1	Proliferate_DR	Proliferate_DR	Proliferate_DR	1	0	1
d10ef306996b		1	Proliferate_DR	Proliferate_DR	Proliferate_DR	1	0	1
d1a24527a15d		1	Proliferate_DR	Mild	Mild	1	1	0
d271d3a2b552		1	Proliferate_DR	Proliferate_DR	Proliferate_DR	1	0	1
d2901144070c		1	Proliferate_DR	Proliferate_DR	Proliferate_DR	1	0	1
d2c2f02bb313		1	Proliferate_DR	Moderate	Moderate	1	1	0
d48178e4a49b		1	Proliferate_DR	Mild	Mild	1	1	0
d51b3fe0fa1b		1	Proliferate_DR	Proliferate_DR	Proliferate_DR	1	0	1
d659d7fd5ccf		1	Proliferate_DR	Proliferate_DR	Proliferate_DR	1	0	1
d803598dabda		1	Proliferate_DR	Moderate	Moderate	1	1	0
d85ea1220a03		1	Proliferate_DR	No_DR	No_DR	1	1	0
d9ba044671e1		1	Proliferate_DR	Moderate	Moderate	1	1	0
dad71ba27a9b		1	Proliferate_DR	Proliferate_DR	Proliferate_DR	1	0	1
de16416220de		1	Proliferate_DR	Proliferate_DR	Proliferate_DR	1	0	1
df4913ca3712		1	Proliferate_DR	Proliferate_DR	Proliferate_DR	1	0	1
df4aec4a0eaf		1	Proliferate_DR	Proliferate_DR	Proliferate_DR	1	0	1
df84e7113003		1	Proliferate_DR	Moderate	Moderate	1	1	0
e019b3e0f33d		1	Proliferate_DR	Proliferate_DR	Proliferate_DR	1	0	1
e037643244b7		1	Proliferate_DR	Proliferate_DR	Proliferate_DR	1	0	1
e23add229074		1	Proliferate_DR	Moderate	Moderate	1	1	0
e32dc722eca5		1	Proliferate_DR	Proliferate_DR	Proliferate_DR	1	0	1
e39b627cf648		1	Proliferate_DR	Moderate	Moderate	1	1	0
e3ab63dc9a60		1	Proliferate_DR	Mild	Mild	1	1	0
e3ec668f6fad		1	Proliferate_DR	Proliferate_DR	Proliferate_DR	1	0	1
e4730ddde408		1	Proliferate_DR	Moderate	Moderate	1	1	0
e4f12411fd85		1	Proliferate_DR	Proliferate_DR	Proliferate_DR	1	0	1
e62490b7d0e9		1	Proliferate_DR	Proliferate_DR	Proliferate_DR	1	0	1
e740af6ac6ea		1	Proliferate_DR	Moderate	Moderate	1	1	0
e7d2c2c3b30f		1	Proliferate_DR	Moderate	Moderate	1	1	0
e821c1b6417a		1	Proliferate_DR	Proliferate_DR	Proliferate_DR	1	0	1
e9ab8413e771		1	Proliferate_DR	No_DR	No_DR	1	1	0
eaa0dfbd5024		1	Proliferate_DR	Proliferate_DR	Proliferate_DR	1	0	1
eadc57064154		1	Proliferate_DR	No_DR	No_DR	1	1	0
eb1d37b71fd1		1	Proliferate_DR	Proliferate_DR	Proliferate_DR	1	0	1
ebe0175e530c		1	Proliferate_DR	Proliferate_DR	Proliferate_DR	1	0	1
ed246ae1ed08		1	Proliferate_DR	Proliferate_DR	Proliferate_DR	1	0	1
ed3a0fc5b546		1	Proliferate_DR	Proliferate_DR	Proliferate_DR	1	0	1
ee1ec90b980f		1	Proliferate_DR	Mild	Mild	1	1	0
ef26625121b3		1	Proliferate_DR	Proliferate_DR	Proliferate_DR	1	0	1
f0098e9d4aee		1	Proliferate_DR	Proliferate_DR	Proliferate_DR	1	0	1
f025f33b2c9b		1	Proliferate_DR	Proliferate_DR	Proliferate_DR	1	0	1
f03d3c4ce7fb		1	Proliferate_DR	Moderate	Moderate	1	1	0
f0f89314e860		1	Proliferate_DR	Severe	Severe	1	1	0
f1dc26c4bfa3		1	Proliferate_DR	Proliferate_DR	Proliferate_DR	1	0	1
f2d2a0c92034		1	Proliferate_DR	Proliferate_DR	Proliferate_DR	1	0	1
f549294e12e1		1	Proliferate_DR	Proliferate_DR	Proliferate_DR	1	0	1
f58d37d48e42		1	Proliferate_DR	Proliferate_DR	Proliferate_DR	1	0	1
f5e6226bd2e0		1	Proliferate_DR	Mild	Mild	1	1	0
f69835dc7c50		1	Proliferate_DR	Moderate	Moderate	1	1	0
f6f3ea0d2693		1	Proliferate_DR	Proliferate_DR	Proliferate_DR	1	0	1
f72adcac5638		1	Proliferate_DR	Proliferate_DR	Proliferate_DR	1	0	1
f850cb51fdba		1	Proliferate_DR	Proliferate_DR	Proliferate_DR	1	0	1
f8cf7ed8ef00		1	Proliferate_DR	Proliferate_DR	Proliferate_DR	1	0	1
fa59221cf464		1	Proliferate_DR	Proliferate_DR	Proliferate_DR	1	0	1
fb696a8e055a		1	Proliferate_DR	Proliferate_DR	Proliferate_DR	1	0	1
fce93caa4758		1	Proliferate_DR	Proliferate_DR	Proliferate_DR	1	0	1
fdd534271f3d		1	Proliferate_DR	Moderate	Moderate	1	1	0
ff8a0b45c789		1	Proliferate_DR	Proliferate_DR	Proliferate_DR	1	0	1
						59	21	38

## Sheet: Proliferate_1_alexnet_densenet
		Activation Maps Consensus		Network 1	Network 2
Immagine	Immagine	Gradcam-Consensus	True_Label	Alexnet_Scratch	Densenet_Scratch	Predict_Consensus	Penalty	Trustability
cf1b9d26d38d		0.273897	Proliferate_DR	Proliferate_DR	Moderate	0	1	-0.726103
d0b132d2c7ec		0.75662	Proliferate_DR	Proliferate_DR	No_DR	0	1	-0.24338
d10ef306996b		0.375493	Proliferate_DR	Proliferate_DR	Moderate	0	1	-0.624507
d1a24527a15d		0.5964	Proliferate_DR	Mild	Mild	1	1	-0.4036
d271d3a2b552		0.604598	Proliferate_DR	Proliferate_DR	Proliferate_DR	1	0	0.604598
d2901144070c		0.542814	Proliferate_DR	Proliferate_DR	Mild	0	1	-0.457186
d2c2f02bb313		0.501503	Proliferate_DR	Moderate	Severe	0	1	-0.498497
d48178e4a49b		0.559515	Proliferate_DR	Mild	Moderate	0	1	-0.440485
d51b3fe0fa1b		0.2674	Proliferate_DR	Proliferate_DR	Proliferate_DR	1	0	0.2674
d659d7fd5ccf		0.469682	Proliferate_DR	Proliferate_DR	Moderate	0	1	-0.530318
d803598dabda		0.314971	Proliferate_DR	Moderate	Moderate	1	1	-0.685029
d85ea1220a03		0.667221	Proliferate_DR	No_DR	No_DR	1	1	-0.332779
d9ba044671e1		0.44878	Proliferate_DR	Moderate	Moderate	1	1	-0.55122
dad71ba27a9b		0.257619	Proliferate_DR	Proliferate_DR	Moderate	0	1	-0.742381
de16416220de		0.39746	Proliferate_DR	Proliferate_DR	Proliferate_DR	1	0	0.39746
df4913ca3712		0.2674	Proliferate_DR	Proliferate_DR	Proliferate_DR	1	0	0.2674
df4aec4a0eaf		0.334499	Proliferate_DR	Proliferate_DR	Moderate	0	1	-0.665501
df84e7113003		0.495478	Proliferate_DR	Moderate	Moderate	1	1	-0.504522
e019b3e0f33d		0.580963	Proliferate_DR	Proliferate_DR	Moderate	0	1	-0.419037
e037643244b7		0.398494	Proliferate_DR	Proliferate_DR	Proliferate_DR	1	0	0.398494
e23add229074		0.214289	Proliferate_DR	Moderate	Moderate	1	1	-0.785711
e32dc722eca5		0.396808	Proliferate_DR	Proliferate_DR	Moderate	0	1	-0.603192
e39b627cf648		0.480382	Proliferate_DR	Moderate	Proliferate_DR	0	1	-0.519618
e3ab63dc9a60		0.648869	Proliferate_DR	Mild	Mild	1	1	-0.351131
e3ec668f6fad		0.277711	Proliferate_DR	Proliferate_DR	Proliferate_DR	1	0	0.277711
e4730ddde408		0.403299	Proliferate_DR	Moderate	Moderate	1	1	-0.596701
e4f12411fd85		0.31206	Proliferate_DR	Proliferate_DR	Severe	0	1	-0.68794
e62490b7d0e9		0.471678	Proliferate_DR	Proliferate_DR	Moderate	0	1	-0.528322
e740af6ac6ea		0.224752	Proliferate_DR	Moderate	Proliferate_DR	0	1	-0.775248
e7d2c2c3b30f		0.532929	Proliferate_DR	Moderate	Severe	0	1	-0.467071
e821c1b6417a		0.288212	Proliferate_DR	Proliferate_DR	Moderate	0	1	-0.711788
e9ab8413e771		0.477379	Proliferate_DR	No_DR	No_DR	1	1	-0.522621
eaa0dfbd5024		0.352778	Proliferate_DR	Proliferate_DR	Moderate	0	1	-0.647222
eadc57064154		0.425015	Proliferate_DR	No_DR	No_DR	1	1	-0.574985
eb1d37b71fd1		0.414478	Proliferate_DR	Proliferate_DR	Proliferate_DR	1	0	0.414478
ebe0175e530c		0.476383	Proliferate_DR	Proliferate_DR	Proliferate_DR	1	0	0.476383
ed246ae1ed08		0.701045	Proliferate_DR	Proliferate_DR	Mild	0	1	-0.298955
ed3a0fc5b546		0.459439	Proliferate_DR	Proliferate_DR	Proliferate_DR	1	0	0.459439
ee1ec90b980f		0.423053	Proliferate_DR	Mild	Proliferate_DR	0	1	-0.576947
ef26625121b3		0.473919	Proliferate_DR	Proliferate_DR	Moderate	0	1	-0.526081
f0098e9d4aee		0.585869	Proliferate_DR	Proliferate_DR	Moderate	0	1	-0.414131
f025f33b2c9b		0.531214	Proliferate_DR	Proliferate_DR	Proliferate_DR	1	0	0.531214
f03d3c4ce7fb		0.314402	Proliferate_DR	Moderate	Moderate	1	1	-0.685598
f0f89314e860		0.184198	Proliferate_DR	Severe	Severe	1	1	-0.815802
f1dc26c4bfa3		0.496536	Proliferate_DR	Proliferate_DR	Moderate	0	1	-0.503464
f2d2a0c92034		0.269715	Proliferate_DR	Proliferate_DR	Proliferate_DR	1	0	0.269715
f549294e12e1		0.446038	Proliferate_DR	Proliferate_DR	Proliferate_DR	1	0	0.446038
f58d37d48e42		0.636733	Proliferate_DR	Proliferate_DR	Proliferate_DR	1	0	0.636733
f5e6226bd2e0		0.307535	Proliferate_DR	Mild	Moderate	0	1	-0.692465
f69835dc7c50		0.395874	Proliferate_DR	Moderate	Moderate	1	1	-0.604126
f6f3ea0d2693		0.263474	Proliferate_DR	Proliferate_DR	Proliferate_DR	1	0	0.263474
f72adcac5638		0.158584	Proliferate_DR	Proliferate_DR	Moderate	0	1	-0.841416
f850cb51fdba		0.661473	Proliferate_DR	Proliferate_DR	Mild	0	1	-0.338527
f8cf7ed8ef00		0.709041	Proliferate_DR	Proliferate_DR	Proliferate_DR	1	0	0.709041
fa59221cf464		0.391525	Proliferate_DR	Proliferate_DR	Severe	0	1	-0.608475
fb696a8e055a		0.540837	Proliferate_DR	Proliferate_DR	Proliferate_DR	1	0	0.540837
fce93caa4758		0.759643	Proliferate_DR	Proliferate_DR	Mild	0	1	-0.240357
fdd534271f3d		0.295114	Proliferate_DR	Moderate	Severe	0	1	-0.704886
ff8a0b45c789		0.523156	Proliferate_DR	Proliferate_DR	Proliferate_DR	1	0	0.523156
						30	42	-15.9638

## Sheet: Proliferate_1_alexnet_efficient
		Activation Maps Consensus		Network 1	Network 2
Immagine	Immagine	Gradcam-Consensus	True_Label	Alexnet_Scratch	Densenet_Scratch	Predict_Consensus	Penalty	Trustability
cf1b9d26d38d		0.225243	Proliferate_DR	Proliferate_DR	Moderate	0	1	-0.774757
d0b132d2c7ec		0.711601	Proliferate_DR	Proliferate_DR	Moderate	0	1	-0.288399
d10ef306996b		0.214469	Proliferate_DR	Proliferate_DR	Proliferate_DR	1	0	0.214469
d1a24527a15d		0.422563	Proliferate_DR	Mild	Mild	1	1	-0.577437
d271d3a2b552		0.643879	Proliferate_DR	Proliferate_DR	Proliferate_DR	1	0	0.643879
d2901144070c		0.302215	Proliferate_DR	Proliferate_DR	Proliferate_DR	1	0	0.302215
d2c2f02bb313		0.298614	Proliferate_DR	Moderate	Moderate	1	1	-0.701386
d48178e4a49b		0.474869	Proliferate_DR	Mild	Moderate	0	1	-0.525131
d51b3fe0fa1b		0.583643	Proliferate_DR	Proliferate_DR	Proliferate_DR	1	0	0.583643
d659d7fd5ccf		0.373957	Proliferate_DR	Proliferate_DR	Moderate	0	1	-0.626043
d803598dabda		0.268883	Proliferate_DR	Moderate	Moderate	1	1	-0.731117
d85ea1220a03		0.68212	Proliferate_DR	No_DR	No_DR	1	1	-0.31788
d9ba044671e1		0.401853	Proliferate_DR	Moderate	Moderate	1	1	-0.598147
dad71ba27a9b		0.425659	Proliferate_DR	Proliferate_DR	Proliferate_DR	1	0	0.425659
de16416220de		0.350358	Proliferate_DR	Proliferate_DR	Proliferate_DR	1	0	0.350358
df4913ca3712		0.583643	Proliferate_DR	Proliferate_DR	Proliferate_DR	1	0	0.583643
df4aec4a0eaf		0.22348	Proliferate_DR	Proliferate_DR	Moderate	0	1	-0.77652
df84e7113003		0.383342	Proliferate_DR	Moderate	Moderate	1	1	-0.616658
e019b3e0f33d		0.38597	Proliferate_DR	Proliferate_DR	Severe	0	1	-0.61403
e037643244b7		0.334353	Proliferate_DR	Proliferate_DR	Proliferate_DR	1	0	0.334353
e23add229074		0.137519	Proliferate_DR	Moderate	Proliferate_DR	0	1	-0.862481
e32dc722eca5		0.162189	Proliferate_DR	Proliferate_DR	Moderate	0	1	-0.837811
e39b627cf648		0.248737	Proliferate_DR	Moderate	Moderate	1	1	-0.751263
e3ab63dc9a60		0.581197	Proliferate_DR	Mild	Mild	1	1	-0.418803
e3ec668f6fad		0.276645	Proliferate_DR	Proliferate_DR	Proliferate_DR	1	0	0.276645
e4730ddde408		0.35911	Proliferate_DR	Moderate	Moderate	1	1	-0.64089
e4f12411fd85		0.271637	Proliferate_DR	Proliferate_DR	Proliferate_DR	1	0	0.271637
e62490b7d0e9		0.181085	Proliferate_DR	Proliferate_DR	Moderate	0	1	-0.818915
e740af6ac6ea		0.264109	Proliferate_DR	Moderate	Proliferate_DR	0	1	-0.735891
e7d2c2c3b30f		0.331331	Proliferate_DR	Moderate	Moderate	1	1	-0.668669
e821c1b6417a		0.680037	Proliferate_DR	Proliferate_DR	Proliferate_DR	1	0	0.680037
e9ab8413e771		0.470655	Proliferate_DR	No_DR	No_DR	1	1	-0.529345
eaa0dfbd5024		0.184894	Proliferate_DR	Proliferate_DR	Mild	0	1	-0.815106
eadc57064154		0.493721	Proliferate_DR	No_DR	Mild	0	1	-0.506279
eb1d37b71fd1		0.344294	Proliferate_DR	Proliferate_DR	Moderate	0	1	-0.655706
ebe0175e530c		0.547547	Proliferate_DR	Proliferate_DR	Proliferate_DR	1	0	0.547547
ed246ae1ed08		0.689006	Proliferate_DR	Proliferate_DR	Mild	0	1	-0.310994
ed3a0fc5b546		0.641	Proliferate_DR	Proliferate_DR	Proliferate_DR	1	0	0.641
ee1ec90b980f		0.371019	Proliferate_DR	Mild	Moderate	0	1	-0.628981
ef26625121b3		0.600971	Proliferate_DR	Proliferate_DR	Proliferate_DR	1	0	0.600971
f0098e9d4aee		0.423062	Proliferate_DR	Proliferate_DR	Proliferate_DR	1	0	0.423062
f025f33b2c9b		0.53221	Proliferate_DR	Proliferate_DR	Proliferate_DR	1	0	0.53221
f03d3c4ce7fb		0.243656	Proliferate_DR	Moderate	Moderate	1	1	-0.756344
f0f89314e860		0.332258	Proliferate_DR	Severe	Severe	1	1	-0.667742
f1dc26c4bfa3		0.422389	Proliferate_DR	Proliferate_DR	Moderate	0	1	-0.577611
f2d2a0c92034		0.115536	Proliferate_DR	Proliferate_DR	Proliferate_DR	1	0	0.115536
f549294e12e1		0.322597	Proliferate_DR	Proliferate_DR	Mild	0	1	-0.677403
f58d37d48e42		0.526354	Proliferate_DR	Proliferate_DR	Proliferate_DR	1	0	0.526354
f5e6226bd2e0		0.245457	Proliferate_DR	Mild	Severe	0	1	-0.754543
f69835dc7c50		0.31112	Proliferate_DR	Moderate	Moderate	1	1	-0.68888
f6f3ea0d2693		0.411928	Proliferate_DR	Proliferate_DR	Proliferate_DR	1	0	0.411928
f72adcac5638		0.091559	Proliferate_DR	Proliferate_DR	Proliferate_DR	1	0	0.091559
f850cb51fdba		0.775127	Proliferate_DR	Proliferate_DR	Mild	0	1	-0.224873
f8cf7ed8ef00		0.691333	Proliferate_DR	Proliferate_DR	Proliferate_DR	1	0	0.691333
fa59221cf464		0.353	Proliferate_DR	Proliferate_DR	Proliferate_DR	1	0	0.353
fb696a8e055a		0.777525	Proliferate_DR	Proliferate_DR	Proliferate_DR	1	0	0.777525
fce93caa4758		0.614629	Proliferate_DR	Proliferate_DR	Mild	0	1	-0.385371
fdd534271f3d		0.340611	Proliferate_DR	Moderate	Moderate	1	1	-0.659389
ff8a0b45c789		0.527012	Proliferate_DR	Proliferate_DR	Proliferate_DR	1	0	0.527012
						39	35	-10.8152

## Sheet: Proliferate_1_alexnet_googlenet
		Activation Maps Consensus		Network 1	Network 2
Immagine	Immagine	Gradcam-Consensus	True_Label	Alexnet_Scratch	Densenet_Scratch	Predict_Consensus	Penalty	Trustability
cf1b9d26d38d		0.299607	Proliferate_DR	Proliferate_DR	Mild	0	1	-0.700393
d0b132d2c7ec		0.644047	Proliferate_DR	Proliferate_DR	Moderate	0	1	-0.355953
d10ef306996b		0.56692	Proliferate_DR	Proliferate_DR	Moderate	0	1	-0.43308
d1a24527a15d		0.34266	Proliferate_DR	Mild	No_DR	0	1	-0.65734
d271d3a2b552		0.468366	Proliferate_DR	Proliferate_DR	Proliferate_DR	1	0	0.468366
d2901144070c		0.173489	Proliferate_DR	Proliferate_DR	Mild	0	1	-0.826511
d2c2f02bb313		0.421138	Proliferate_DR	Moderate	Mild	0	1	-0.578862
d48178e4a49b		0.370791	Proliferate_DR	Mild	Mild	1	1	-0.629209
d51b3fe0fa1b		0.234512	Proliferate_DR	Proliferate_DR	Mild	0	1	-0.765488
d659d7fd5ccf		0.586982	Proliferate_DR	Proliferate_DR	Proliferate_DR	1	0	0.586982
d803598dabda		0.523364	Proliferate_DR	Moderate	Moderate	1	1	-0.476636
d85ea1220a03		0.700778	Proliferate_DR	No_DR	No_DR	1	1	-0.299222
d9ba044671e1		0.439351	Proliferate_DR	Moderate	Moderate	1	1	-0.560649
dad71ba27a9b		0.456384	Proliferate_DR	Proliferate_DR	Mild	0	1	-0.543616
de16416220de		0.330482	Proliferate_DR	Proliferate_DR	Mild	0	1	-0.669518
df4913ca3712		0.234512	Proliferate_DR	Proliferate_DR	Mild	0	1	-0.765488
df4aec4a0eaf		0.231461	Proliferate_DR	Proliferate_DR	Moderate	0	1	-0.768539
df84e7113003		0.509746	Proliferate_DR	Moderate	Moderate	1	1	-0.490254
e019b3e0f33d		0.570112	Proliferate_DR	Proliferate_DR	Moderate	0	1	-0.429888
e037643244b7		0.490728	Proliferate_DR	Proliferate_DR	Mild	0	1	-0.509272
e23add229074		0.341672	Proliferate_DR	Moderate	Proliferate_DR	0	1	-0.658328
e32dc722eca5		0.290169	Proliferate_DR	Proliferate_DR	Moderate	0	1	-0.709831
e39b627cf648		0.504004	Proliferate_DR	Moderate	Moderate	1	1	-0.495996
e3ab63dc9a60		0.377152	Proliferate_DR	Mild	Mild	1	1	-0.622848
e3ec668f6fad		0.386262	Proliferate_DR	Proliferate_DR	Proliferate_DR	1	0	0.386262
e4730ddde408		0.397009	Proliferate_DR	Moderate	Moderate	1	1	-0.602991
e4f12411fd85		0.330508	Proliferate_DR	Proliferate_DR	Severe	0	1	-0.669492
e62490b7d0e9		0.396842	Proliferate_DR	Proliferate_DR	Moderate	0	1	-0.603158
e740af6ac6ea		0.282815	Proliferate_DR	Moderate	Moderate	1	1	-0.717185
e7d2c2c3b30f		0.296511	Proliferate_DR	Moderate	Moderate	1	1	-0.703489
e821c1b6417a		0.254656	Proliferate_DR	Proliferate_DR	No_DR	0	1	-0.745344
e9ab8413e771		0.308066	Proliferate_DR	No_DR	No_DR	1	1	-0.691934
eaa0dfbd5024		0.562797	Proliferate_DR	Proliferate_DR	No_DR	0	1	-0.437203
eadc57064154		0.645567	Proliferate_DR	No_DR	No_DR	1	1	-0.354433
eb1d37b71fd1		0.300463	Proliferate_DR	Proliferate_DR	Mild	0	1	-0.699537
ebe0175e530c		0.625158	Proliferate_DR	Proliferate_DR	Mild	0	1	-0.374842
ed246ae1ed08		0.504681	Proliferate_DR	Proliferate_DR	Moderate	0	1	-0.495319
ed3a0fc5b546		0.481986	Proliferate_DR	Proliferate_DR	Proliferate_DR	1	0	0.481986
ee1ec90b980f		0.43107	Proliferate_DR	Mild	Severe	0	1	-0.56893
ef26625121b3		0.402494	Proliferate_DR	Proliferate_DR	Moderate	0	1	-0.597506
f0098e9d4aee		0.149158	Proliferate_DR	Proliferate_DR	Proliferate_DR	1	0	0.149158
f025f33b2c9b		0.529861	Proliferate_DR	Proliferate_DR	Moderate	0	1	-0.470139
f03d3c4ce7fb		0.333834	Proliferate_DR	Moderate	Moderate	1	1	-0.666166
f0f89314e860		0.440981	Proliferate_DR	Severe	Severe	1	1	-0.559019
f1dc26c4bfa3		0.572146	Proliferate_DR	Proliferate_DR	Mild	0	1	-0.427854
f2d2a0c92034		0.423639	Proliferate_DR	Proliferate_DR	Proliferate_DR	1	0	0.423639
f549294e12e1		0.284702	Proliferate_DR	Proliferate_DR	Proliferate_DR	1	0	0.284702
f58d37d48e42		0.59271	Proliferate_DR	Proliferate_DR	Mild	0	1	-0.40729
f5e6226bd2e0		0.290349	Proliferate_DR	Mild	Mild	1	1	-0.709651
f69835dc7c50		0.501368	Proliferate_DR	Moderate	Severe	0	1	-0.498632
f6f3ea0d2693		0.248244	Proliferate_DR	Proliferate_DR	Proliferate_DR	1	0	0.248244
f72adcac5638		0.226175	Proliferate_DR	Proliferate_DR	Moderate	0	1	-0.773825
f850cb51fdba		0.583548	Proliferate_DR	Proliferate_DR	Mild	0	1	-0.416452
f8cf7ed8ef00		0.273025	Proliferate_DR	Proliferate_DR	Mild	0	1	-0.726975
fa59221cf464		0.250585	Proliferate_DR	Proliferate_DR	No_DR	0	1	-0.749415
fb696a8e055a		0.439797	Proliferate_DR	Proliferate_DR	Moderate	0	1	-0.560203
fce93caa4758		0.510623	Proliferate_DR	Proliferate_DR	Mild	0	1	-0.489377
fdd534271f3d		0.530041	Proliferate_DR	Moderate	Severe	0	1	-0.469959
ff8a0b45c789		0.479378	Proliferate_DR	Proliferate_DR	Mild	0	1	-0.520622
						23	51	-26.6245

## Sheet: Proliferate_alexnet_incresnetv2
		Activation Maps Consensus		Network 1	Network 2
Immagine	Immagine	Gradcam-Consensus	True_Label	Alexnet_Scratch	Densenet_Scratch	Predict_Consensus	Penalty	Trustability
cf1b9d26d38d		0.000186	Proliferate_DR	Proliferate_DR	Moderate	0	1	-0.999814
d0b132d2c7ec		0.000297	Proliferate_DR	Proliferate_DR	Proliferate_DR	1	0	0.000297
d10ef306996b		9.6e-05	Proliferate_DR	Proliferate_DR	Moderate	0	1	-0.999904
d1a24527a15d		0.000213	Proliferate_DR	Mild	Mild	1	1	-0.999787
d271d3a2b552		0.000113	Proliferate_DR	Proliferate_DR	Mild	0	1	-0.999887
d2901144070c		0.00028	Proliferate_DR	Proliferate_DR	Moderate	0	1	-0.99972
d2c2f02bb313		0.000114	Proliferate_DR	Moderate	Moderate	1	1	-0.999886
d48178e4a49b		0.000132	Proliferate_DR	Mild	Moderate	0	1	-0.999868
d51b3fe0fa1b		0.000276	Proliferate_DR	Proliferate_DR	Mild	0	1	-0.999724
d659d7fd5ccf		0.000207	Proliferate_DR	Proliferate_DR	Moderate	0	1	-0.999793
d803598dabda		0.000133	Proliferate_DR	Moderate	Moderate	1	1	-0.999867
d85ea1220a03		0.00031	Proliferate_DR	No_DR	No_DR	1	1	-0.99969
d9ba044671e1		0.000141	Proliferate_DR	Moderate	Moderate	1	1	-0.999859
dad71ba27a9b		0.000156	Proliferate_DR	Proliferate_DR	Moderate	0	1	-0.999844
de16416220de		0.000165	Proliferate_DR	Proliferate_DR	Proliferate_DR	1	0	0.000165
df4913ca3712		0.000276	Proliferate_DR	Proliferate_DR	Mild	0	1	-0.999724
df4aec4a0eaf		0.000135	Proliferate_DR	Proliferate_DR	Moderate	0	1	-0.999865
df84e7113003		0.000176	Proliferate_DR	Moderate	Moderate	1	1	-0.999824
e019b3e0f33d		0.000156	Proliferate_DR	Proliferate_DR	Moderate	0	1	-0.999844
e037643244b7		0.0001	Proliferate_DR	Proliferate_DR	Proliferate_DR	1	0	0.0001
e23add229074		0.000136	Proliferate_DR	Moderate	Moderate	1	1	-0.999864
e32dc722eca5		0.000132	Proliferate_DR	Proliferate_DR	Moderate	0	1	-0.999868
e39b627cf648		0.000155	Proliferate_DR	Moderate	Moderate	1	1	-0.999845
e3ab63dc9a60		0.000139	Proliferate_DR	Mild	Moderate	0	1	-0.999861
e3ec668f6fad		0.000181	Proliferate_DR	Proliferate_DR	Moderate	0	1	-0.999819
e4730ddde408		9.7e-05	Proliferate_DR	Moderate	Moderate	1	1	-0.999903
e4f12411fd85		0.000202	Proliferate_DR	Proliferate_DR	Mild	0	1	-0.999798
e62490b7d0e9		0.000201	Proliferate_DR	Proliferate_DR	Moderate	0	1	-0.999799
e740af6ac6ea		0.000212	Proliferate_DR	Moderate	Moderate	1	1	-0.999788
e7d2c2c3b30f		0.000187	Proliferate_DR	Moderate	Moderate	1	1	-0.999813
e821c1b6417a		0.000229	Proliferate_DR	Proliferate_DR	Moderate	0	1	-0.999771
e9ab8413e771		0.000159	Proliferate_DR	No_DR	Moderate	0	1	-0.999841
eaa0dfbd5024		0.000154	Proliferate_DR	Proliferate_DR	Moderate	0	1	-0.999846
eadc57064154		0.000317	Proliferate_DR	No_DR	No_DR	1	1	-0.999683
eb1d37b71fd1		0.000154	Proliferate_DR	Proliferate_DR	Moderate	0	1	-0.999846
ebe0175e530c		0.000135	Proliferate_DR	Proliferate_DR	Mild	0	1	-0.999865
ed246ae1ed08		0.000113	Proliferate_DR	Proliferate_DR	Moderate	0	1	-0.999887
ed3a0fc5b546		0.000247	Proliferate_DR	Proliferate_DR	Proliferate_DR	1	0	0.000247
ee1ec90b980f		0.000147	Proliferate_DR	Mild	Moderate	0	1	-0.999853
ef26625121b3		0.000171	Proliferate_DR	Proliferate_DR	Moderate	0	1	-0.999829
f0098e9d4aee		0.000197	Proliferate_DR	Proliferate_DR	Moderate	0	1	-0.999803
f025f33b2c9b		9.8e-05	Proliferate_DR	Proliferate_DR	Moderate	0	1	-0.999902
f03d3c4ce7fb		0.000148	Proliferate_DR	Moderate	Moderate	1	1	-0.999852
f0f89314e860		0.00014	Proliferate_DR	Severe	Severe	1	1	-0.99986
f1dc26c4bfa3		0.000128	Proliferate_DR	Proliferate_DR	Moderate	0	1	-0.999872
f2d2a0c92034		0.000107	Proliferate_DR	Proliferate_DR	Moderate	0	1	-0.999893
f549294e12e1		0.000247	Proliferate_DR	Proliferate_DR	Moderate	0	1	-0.999753
f58d37d48e42		0.000179	Proliferate_DR	Proliferate_DR	Mild	0	1	-0.999821
f5e6226bd2e0		0.00011	Proliferate_DR	Mild	Moderate	0	1	-0.99989
f69835dc7c50		0.000141	Proliferate_DR	Moderate	Moderate	1	1	-0.999859
f6f3ea0d2693		0.00039	Proliferate_DR	Proliferate_DR	Proliferate_DR	1	0	0.00039
f72adcac5638		7.4e-05	Proliferate_DR	Proliferate_DR	Proliferate_DR	1	0	7.4e-05
f850cb51fdba		0.000149	Proliferate_DR	Proliferate_DR	Mild	0	1	-0.999851
f8cf7ed8ef00		0.000183	Proliferate_DR	Proliferate_DR	Mild	0	1	-0.999817
fa59221cf464		0.000243	Proliferate_DR	Proliferate_DR	Mild	0	1	-0.999757
fb696a8e055a		0.000408	Proliferate_DR	Proliferate_DR	Proliferate_DR	1	0	0.000408
fce93caa4758		0.000213	Proliferate_DR	Proliferate_DR	Moderate	0	1	-0.999787
fdd534271f3d		0.000134	Proliferate_DR	Moderate	Proliferate_DR	0	1	-0.999866
ff8a0b45c789		0.001023	Proliferate_DR	Proliferate_DR	Proliferate_DR	1	0	0.001023
						23	51	-50.9886

## Sheet: Proliferate_alexnet_inceptionv3
		Activation Maps Consensus		Network 1	Network 2
Immagine	Immagine	Gradcam-Consensus	True_Label	Alexnet_Scratch	Densenet_Scratch	Predict_Consensus	Penalty	Trustability
cf1b9d26d38d		0.181666	Proliferate_DR	Proliferate_DR	Proliferate_DR	1	0	0.181666
d0b132d2c7ec		0.683584	Proliferate_DR	Proliferate_DR	Moderate	0	1	-0.316416
d10ef306996b		0.523471	Proliferate_DR	Proliferate_DR	Moderate	0	1	-0.476529
d1a24527a15d		0.510781	Proliferate_DR	Mild	Mild	1	1	-0.489219
d271d3a2b552		0.455478	Proliferate_DR	Proliferate_DR	Moderate	0	1	-0.544522
d2901144070c		0.390236	Proliferate_DR	Proliferate_DR	Proliferate_DR	1	0	0.390236
d2c2f02bb313		0.44397	Proliferate_DR	Moderate	Moderate	1	1	-0.55603
d48178e4a49b		0.408335	Proliferate_DR	Mild	Proliferate_DR	0	1	-0.591665
d51b3fe0fa1b		0.359141	Proliferate_DR	Proliferate_DR	Proliferate_DR	1	0	0.359141
d659d7fd5ccf		0.412147	Proliferate_DR	Proliferate_DR	Moderate	0	1	-0.587853
d803598dabda		0.30062	Proliferate_DR	Moderate	Moderate	1	1	-0.69938
d85ea1220a03		0.586287	Proliferate_DR	No_DR	Moderate	0	1	-0.413713
d9ba044671e1		0.416873	Proliferate_DR	Moderate	Moderate	1	1	-0.583127
dad71ba27a9b		0.264075	Proliferate_DR	Proliferate_DR	Proliferate_DR	1	0	0.264075
de16416220de		0.440892	Proliferate_DR	Proliferate_DR	Proliferate_DR	1	0	0.440892
df4913ca3712		0.359141	Proliferate_DR	Proliferate_DR	Proliferate_DR	1	0	0.359141
df4aec4a0eaf		0.351224	Proliferate_DR	Proliferate_DR	Moderate	0	1	-0.648776
df84e7113003		0.298759	Proliferate_DR	Moderate	Moderate	1	1	-0.701241
e019b3e0f33d		0.425747	Proliferate_DR	Proliferate_DR	Proliferate_DR	1	0	0.425747
e037643244b7		0.36506	Proliferate_DR	Proliferate_DR	Proliferate_DR	1	0	0.36506
e23add229074		0.185292	Proliferate_DR	Moderate	Proliferate_DR	0	1	-0.814708
e32dc722eca5		0.289233	Proliferate_DR	Proliferate_DR	Moderate	0	1	-0.710767
e39b627cf648		0.413931	Proliferate_DR	Moderate	Moderate	1	1	-0.586069
e3ab63dc9a60		0.516522	Proliferate_DR	Mild	Moderate	0	1	-0.483478
e3ec668f6fad		0.2521	Proliferate_DR	Proliferate_DR	Proliferate_DR	1	0	0.2521
e4730ddde408		0.340935	Proliferate_DR	Moderate	Moderate	1	1	-0.659065
e4f12411fd85		0.302731	Proliferate_DR	Proliferate_DR	Severe	0	1	-0.697269
e62490b7d0e9		0.385697	Proliferate_DR	Proliferate_DR	Moderate	0	1	-0.614303
e740af6ac6ea		0.168889	Proliferate_DR	Moderate	Proliferate_DR	0	1	-0.831111
e7d2c2c3b30f		0.465187	Proliferate_DR	Moderate	Severe	0	1	-0.534813
e821c1b6417a		0	Proliferate_DR	Proliferate_DR	No_DR	0	1	-1
e9ab8413e771		0.268095	Proliferate_DR	No_DR	No_DR	1	1	-0.731905
eaa0dfbd5024		0.230036	Proliferate_DR	Proliferate_DR	Proliferate_DR	1	0	0.230036
eadc57064154		0.564014	Proliferate_DR	No_DR	No_DR	1	1	-0.435986
eb1d37b71fd1		0.346246	Proliferate_DR	Proliferate_DR	Moderate	0	1	-0.653754
ebe0175e530c		0.583259	Proliferate_DR	Proliferate_DR	Proliferate_DR	1	0	0.583259
ed246ae1ed08		0.646064	Proliferate_DR	Proliferate_DR	Proliferate_DR	1	0	0.646064
ed3a0fc5b546		0.283584	Proliferate_DR	Proliferate_DR	Proliferate_DR	1	0	0.283584
ee1ec90b980f		0.545839	Proliferate_DR	Mild	Moderate	0	1	-0.454161
ef26625121b3		0.401682	Proliferate_DR	Proliferate_DR	Proliferate_DR	1	0	0.401682
f0098e9d4aee		0.177195	Proliferate_DR	Proliferate_DR	Proliferate_DR	1	0	0.177195
f025f33b2c9b		0.558491	Proliferate_DR	Proliferate_DR	Proliferate_DR	1	0	0.558491
f03d3c4ce7fb		0.287835	Proliferate_DR	Moderate	Moderate	1	1	-0.712165
f0f89314e860		0.402509	Proliferate_DR	Severe	Severe	1	1	-0.597491
f1dc26c4bfa3		0.503186	Proliferate_DR	Proliferate_DR	Moderate	0	1	-0.496814
f2d2a0c92034		0.116821	Proliferate_DR	Proliferate_DR	Severe	0	1	-0.883179
f549294e12e1		0.256241	Proliferate_DR	Proliferate_DR	Proliferate_DR	1	0	0.256241
f58d37d48e42		0.297452	Proliferate_DR	Proliferate_DR	Proliferate_DR	1	0	0.297452
f5e6226bd2e0		0.340076	Proliferate_DR	Mild	Moderate	0	1	-0.659924
f69835dc7c50		0.366443	Proliferate_DR	Moderate	Moderate	1	1	-0.633557
f6f3ea0d2693		0.483648	Proliferate_DR	Proliferate_DR	Proliferate_DR	1	0	0.483648
f72adcac5638		0.101903	Proliferate_DR	Proliferate_DR	Severe	0	1	-0.898097
f850cb51fdba		0.713559	Proliferate_DR	Proliferate_DR	Moderate	0	1	-0.286441
f8cf7ed8ef00		0.689706	Proliferate_DR	Proliferate_DR	Mild	0	1	-0.310294
fa59221cf464		0.329514	Proliferate_DR	Proliferate_DR	Severe	0	1	-0.670486
fb696a8e055a		0.605499	Proliferate_DR	Proliferate_DR	Proliferate_DR	1	0	0.605499
fce93caa4758		0.579882	Proliferate_DR	Proliferate_DR	Moderate	0	1	-0.420118
fdd534271f3d		0.268963	Proliferate_DR	Moderate	Moderate	1	1	-0.731037
ff8a0b45c789		0.502533	Proliferate_DR	Proliferate_DR	Proliferate_DR	1	0	0.502533
						34	38	-15.0517

## Sheet: Proliferate_1_alexnet_mobilenet
		Activation Maps Consensus		Network 1	Network 2
Immagine	Immagine	Gradcam-Consensus	True_Label	Alexnet_Scratch	Densenet_Scratch	Predict_Consensus	Penalty	Trustability
cf1b9d26d38d		0.258612	Proliferate_DR	Proliferate_DR	Proliferate_DR	1	0	0.258612
d0b132d2c7ec		0.662226	Proliferate_DR	Proliferate_DR	No_DR	0	1	-0.337774
d10ef306996b		0.450827	Proliferate_DR	Proliferate_DR	Moderate	0	1	-0.549173
d1a24527a15d		0.372605	Proliferate_DR	Mild	Mild	1	1	-0.627395
d271d3a2b552		0.621489	Proliferate_DR	Proliferate_DR	Proliferate_DR	1	0	0.621489
d2901144070c		0.693167	Proliferate_DR	Proliferate_DR	Mild	0	1	-0.306833
d2c2f02bb313		0.509983	Proliferate_DR	Moderate	Mild	0	1	-0.490017
d48178e4a49b		0.496625	Proliferate_DR	Mild	No_DR	0	1	-0.503375
d51b3fe0fa1b		0.37391	Proliferate_DR	Proliferate_DR	Proliferate_DR	1	0	0.37391
d659d7fd5ccf		0.361335	Proliferate_DR	Proliferate_DR	Moderate	0	1	-0.638665
d803598dabda		0.329246	Proliferate_DR	Moderate	No_DR	0	1	-0.670754
d85ea1220a03		0.480238	Proliferate_DR	No_DR	No_DR	1	1	-0.519762
d9ba044671e1		0.453471	Proliferate_DR	Moderate	Moderate	1	1	-0.546529
dad71ba27a9b		0.322896	Proliferate_DR	Proliferate_DR	Proliferate_DR	1	0	0.322896
de16416220de		0.38031	Proliferate_DR	Proliferate_DR	Proliferate_DR	1	0	0.38031
df4913ca3712		0.37391	Proliferate_DR	Proliferate_DR	Proliferate_DR	1	0	0.37391
df4aec4a0eaf		0.213606	Proliferate_DR	Proliferate_DR	Proliferate_DR	1	0	0.213606
df84e7113003		0.473233	Proliferate_DR	Moderate	Moderate	1	1	-0.526767
e019b3e0f33d		0.459748	Proliferate_DR	Proliferate_DR	Proliferate_DR	1	0	0.459748
e037643244b7		0.249344	Proliferate_DR	Proliferate_DR	Proliferate_DR	1	0	0.249344
e23add229074		0.200193	Proliferate_DR	Moderate	Moderate	1	1	-0.799807
e32dc722eca5		0.165483	Proliferate_DR	Proliferate_DR	Proliferate_DR	1	0	0.165483
e39b627cf648		0.334587	Proliferate_DR	Moderate	Moderate	1	1	-0.665413
e3ab63dc9a60		0.49611	Proliferate_DR	Mild	Proliferate_DR	0	1	-0.50389
e3ec668f6fad		0.275917	Proliferate_DR	Proliferate_DR	Moderate	0	1	-0.724083
e4730ddde408		0.268084	Proliferate_DR	Moderate	Moderate	1	1	-0.731916
e4f12411fd85		0.326455	Proliferate_DR	Proliferate_DR	Severe	0	1	-0.673545
e62490b7d0e9		0.234042	Proliferate_DR	Proliferate_DR	Proliferate_DR	1	0	0.234042
e740af6ac6ea		0.225532	Proliferate_DR	Moderate	Proliferate_DR	0	1	-0.774468
e7d2c2c3b30f		0.345144	Proliferate_DR	Moderate	Mild	0	1	-0.654856
e821c1b6417a		0.196748	Proliferate_DR	Proliferate_DR	Moderate	0	1	-0.803252
e9ab8413e771		0.330414	Proliferate_DR	No_DR	Proliferate_DR	0	1	-0.669586
eaa0dfbd5024		0.088198	Proliferate_DR	Proliferate_DR	Mild	0	1	-0.911802
eadc57064154		0.498514	Proliferate_DR	No_DR	No_DR	1	1	-0.501486
eb1d37b71fd1		0.321705	Proliferate_DR	Proliferate_DR	Moderate	0	1	-0.678295
ebe0175e530c		0.524916	Proliferate_DR	Proliferate_DR	Severe	0	1	-0.475084
ed246ae1ed08		0.522932	Proliferate_DR	Proliferate_DR	Proliferate_DR	1	0	0.522932
ed3a0fc5b546		0.522734	Proliferate_DR	Proliferate_DR	Mild	0	1	-0.477266
ee1ec90b980f		0.353267	Proliferate_DR	Mild	Moderate	0	1	-0.646733
ef26625121b3		0.421795	Proliferate_DR	Proliferate_DR	Moderate	0	1	-0.578205
f0098e9d4aee		0.432834	Proliferate_DR	Proliferate_DR	Mild	0	1	-0.567166
f025f33b2c9b		0.553664	Proliferate_DR	Proliferate_DR	Moderate	0	1	-0.446336
f03d3c4ce7fb		0.293098	Proliferate_DR	Moderate	Severe	0	1	-0.706902
f0f89314e860		0.261867	Proliferate_DR	Severe	Severe	1	1	-0.738133
f1dc26c4bfa3		0.465158	Proliferate_DR	Proliferate_DR	Moderate	0	1	-0.534842
f2d2a0c92034		0.164507	Proliferate_DR	Proliferate_DR	Moderate	0	1	-0.835493
f549294e12e1		0.647014	Proliferate_DR	Proliferate_DR	Moderate	0	1	-0.352986
f58d37d48e42		0.513853	Proliferate_DR	Proliferate_DR	Mild	0	1	-0.486147
f5e6226bd2e0		0.361848	Proliferate_DR	Mild	Severe	0	1	-0.638152
f69835dc7c50		0.431778	Proliferate_DR	Moderate	Moderate	1	1	-0.568222
f6f3ea0d2693		0.473309	Proliferate_DR	Proliferate_DR	Proliferate_DR	1	0	0.473309
f72adcac5638		0.249698	Proliferate_DR	Proliferate_DR	Moderate	0	1	-0.750302
f850cb51fdba		0.641328	Proliferate_DR	Proliferate_DR	Mild	0	1	-0.358672
f8cf7ed8ef00		0.559658	Proliferate_DR	Proliferate_DR	Mild	0	1	-0.440342
fa59221cf464		0.379963	Proliferate_DR	Proliferate_DR	Severe	0	1	-0.620037
fb696a8e055a		0.572007	Proliferate_DR	Proliferate_DR	Moderate	0	1	-0.427993
fce93caa4758		0.732708	Proliferate_DR	Proliferate_DR	Mild	0	1	-0.267292
fdd534271f3d		0.305832	Proliferate_DR	Moderate	Severe	0	1	-0.694168
ff8a0b45c789		0.625399	Proliferate_DR	Proliferate_DR	Moderate	0	1	-0.374601
						23	46	-22.1449

## Sheet: Proliferate_1_alexnet_resnet18
		Activation Maps Consensus		Network 1	Network 2
Immagine	Immagine	Gradcam-Consensus	True_Label	Alexnet_Scratch	Densenet_Scratch	Predict_Consensus	Penalty	Trustability
cf1b9d26d38d		0.323887	Proliferate_DR	Proliferate_DR	Moderate	0	1	-0.676113
d0b132d2c7ec		0.565041	Proliferate_DR	Proliferate_DR	No_DR	0	1	-0.434959
d10ef306996b		0.250422	Proliferate_DR	Proliferate_DR	Moderate	0	1	-0.749578
d1a24527a15d		0.412385	Proliferate_DR	Mild	Mild	1	1	-0.587615
d271d3a2b552		0.615251	Proliferate_DR	Proliferate_DR	Severe	0	1	-0.384749
d2901144070c		0.280666	Proliferate_DR	Proliferate_DR	Mild	0	1	-0.719334
d2c2f02bb313		0.357874	Proliferate_DR	Moderate	Severe	0	1	-0.642126
d48178e4a49b		0.332854	Proliferate_DR	Mild	Moderate	0	1	-0.667146
d51b3fe0fa1b		0.333703	Proliferate_DR	Proliferate_DR	Proliferate_DR	1	0	0.333703
d659d7fd5ccf		0.428321	Proliferate_DR	Proliferate_DR	Moderate	0	1	-0.571679
d803598dabda		0.195674	Proliferate_DR	Moderate	Moderate	1	1	-0.804326
d85ea1220a03		0.537596	Proliferate_DR	No_DR	No_DR	1	1	-0.462404
d9ba044671e1		0.383744	Proliferate_DR	Moderate	Moderate	1	1	-0.616256
dad71ba27a9b		0.252495	Proliferate_DR	Proliferate_DR	Moderate	0	1	-0.747505
de16416220de		0.394382	Proliferate_DR	Proliferate_DR	Moderate	0	1	-0.605618
df4913ca3712		0.333703	Proliferate_DR	Proliferate_DR	Proliferate_DR	1	0	0.333703
df4aec4a0eaf		0.26998	Proliferate_DR	Proliferate_DR	Moderate	0	1	-0.73002
df84e7113003		0.281747	Proliferate_DR	Moderate	Proliferate_DR	0	1	-0.718253
e019b3e0f33d		0.459337	Proliferate_DR	Proliferate_DR	Proliferate_DR	1	0	0.459337
e037643244b7		0.25567	Proliferate_DR	Proliferate_DR	Proliferate_DR	1	0	0.25567
e23add229074		0.332701	Proliferate_DR	Moderate	Moderate	1	1	-0.667299
e32dc722eca5		0.185756	Proliferate_DR	Proliferate_DR	Moderate	0	1	-0.814244
e39b627cf648		0.257759	Proliferate_DR	Moderate	Moderate	1	1	-0.742241
e3ab63dc9a60		0.455418	Proliferate_DR	Mild	Moderate	0	1	-0.544582
e3ec668f6fad		0.159371	Proliferate_DR	Proliferate_DR	Moderate	0	1	-0.840629
e4730ddde408		0.307263	Proliferate_DR	Moderate	Moderate	1	1	-0.692737
e4f12411fd85		0.316294	Proliferate_DR	Proliferate_DR	Severe	0	1	-0.683706
e62490b7d0e9		0.25122	Proliferate_DR	Proliferate_DR	Moderate	0	1	-0.74878
e740af6ac6ea		0.283473	Proliferate_DR	Moderate	Moderate	1	1	-0.716527
e7d2c2c3b30f		0.384134	Proliferate_DR	Moderate	Moderate	1	1	-0.615866
e821c1b6417a		0.207888	Proliferate_DR	Proliferate_DR	No_DR	0	1	-0.792112
e9ab8413e771		0.579906	Proliferate_DR	No_DR	Proliferate_DR	0	1	-0.420094
eaa0dfbd5024		0.156568	Proliferate_DR	Proliferate_DR	Moderate	0	1	-0.843432
eadc57064154		0.486798	Proliferate_DR	No_DR	No_DR	1	1	-0.513202
eb1d37b71fd1		0.408279	Proliferate_DR	Proliferate_DR	Severe	0	1	-0.591721
ebe0175e530c		0.352979	Proliferate_DR	Proliferate_DR	Severe	0	1	-0.647021
ed246ae1ed08		0.5747	Proliferate_DR	Proliferate_DR	Moderate	0	1	-0.4253
ed3a0fc5b546		0.411485	Proliferate_DR	Proliferate_DR	Moderate	0	1	-0.588515
ee1ec90b980f		0.344706	Proliferate_DR	Mild	Severe	0	1	-0.655294
ef26625121b3		0.50839	Proliferate_DR	Proliferate_DR	Moderate	0	1	-0.49161
f0098e9d4aee		0.260202	Proliferate_DR	Proliferate_DR	Moderate	0	1	-0.739798
f025f33b2c9b		0.468618	Proliferate_DR	Proliferate_DR	Proliferate_DR	1	0	0.468618
f03d3c4ce7fb		0.332897	Proliferate_DR	Moderate	Moderate	1	1	-0.667103
f0f89314e860		0.265997	Proliferate_DR	Severe	Severe	1	1	-0.734003
f1dc26c4bfa3		0.470737	Proliferate_DR	Proliferate_DR	Moderate	0	1	-0.529263
f2d2a0c92034		0.049978	Proliferate_DR	Proliferate_DR	Moderate	0	1	-0.950022
f549294e12e1		0.532265	Proliferate_DR	Proliferate_DR	Proliferate_DR	1	0	0.532265
f58d37d48e42		0.412514	Proliferate_DR	Proliferate_DR	Proliferate_DR	1	0	0.412514
f5e6226bd2e0		0.204237	Proliferate_DR	Mild	Moderate	0	1	-0.795763
f69835dc7c50		0.381649	Proliferate_DR	Moderate	Moderate	1	1	-0.618351
f6f3ea0d2693		0.291818	Proliferate_DR	Proliferate_DR	Proliferate_DR	1	0	0.291818
f72adcac5638		0.251898	Proliferate_DR	Proliferate_DR	Moderate	0	1	-0.748102
f850cb51fdba		0.547655	Proliferate_DR	Proliferate_DR	Mild	0	1	-0.452345
f8cf7ed8ef00		0.525259	Proliferate_DR	Proliferate_DR	Proliferate_DR	1	0	0.525259
fa59221cf464		0.187554	Proliferate_DR	Proliferate_DR	Severe	0	1	-0.812446
fb696a8e055a		0.608868	Proliferate_DR	Proliferate_DR	Proliferate_DR	1	0	0.608868
fce93caa4758		0.582399	Proliferate_DR	Proliferate_DR	Moderate	0	1	-0.417601
fdd534271f3d		0.262666	Proliferate_DR	Moderate	Proliferate_DR	0	1	-0.737334
ff8a0b45c789		0.49836	Proliferate_DR	Proliferate_DR	Proliferate_DR	1	0	0.49836
						24	48	-26.6346

## Sheet: Proliferate_1_alexnet_resnet50
		Activation Maps Consensus		Network 1	Network 2
Immagine	Immagine	Gradcam-Consensus	True_Label	Alexnet_Scratch	Densenet_Scratch	Predict_Consensus	Penalty	Trustability
cf1b9d26d38d		0.000186	Proliferate_DR	Proliferate_DR	Mild	0	1	-0.999814
d0b132d2c7ec		0.000297	Proliferate_DR	Proliferate_DR	No_DR	0	1	-0.999703
d10ef306996b		9.6e-05	Proliferate_DR	Proliferate_DR	Moderate	0	1	-0.999904
d1a24527a15d		0.000213	Proliferate_DR	Mild	Mild	1	1	-0.999787
d271d3a2b552		0.000113	Proliferate_DR	Proliferate_DR	Mild	0	1	-0.999887
d2901144070c		0.00028	Proliferate_DR	Proliferate_DR	Moderate	0	1	-0.99972
d2c2f02bb313		0.000114	Proliferate_DR	Moderate	Mild	0	1	-0.999886
d48178e4a49b		0.000132	Proliferate_DR	Mild	Mild	1	1	-0.999868
d51b3fe0fa1b		0.000276	Proliferate_DR	Proliferate_DR	Proliferate_DR	1	0	0.000276
d659d7fd5ccf		0.000207	Proliferate_DR	Proliferate_DR	Moderate	0	1	-0.999793
d803598dabda		0.000133	Proliferate_DR	Moderate	Moderate	1	1	-0.999867
d85ea1220a03		0.00031	Proliferate_DR	No_DR	No_DR	1	1	-0.99969
d9ba044671e1		0.000141	Proliferate_DR	Moderate	Moderate	1	1	-0.999859
dad71ba27a9b		0.000156	Proliferate_DR	Proliferate_DR	Mild	0	1	-0.999844
de16416220de		0.000165	Proliferate_DR	Proliferate_DR	Moderate	0	1	-0.999835
df4913ca3712		0.000276	Proliferate_DR	Proliferate_DR	Proliferate_DR	1	0	0.000276
df4aec4a0eaf		0.000135	Proliferate_DR	Proliferate_DR	Moderate	0	1	-0.999865
df84e7113003		0.000176	Proliferate_DR	Moderate	Proliferate_DR	0	1	-0.999824
e019b3e0f33d		0.000156	Proliferate_DR	Proliferate_DR	Moderate	0	1	-0.999844
e037643244b7		0.0001	Proliferate_DR	Proliferate_DR	Proliferate_DR	1	0	0.0001
e23add229074		0.000136	Proliferate_DR	Moderate	Proliferate_DR	0	1	-0.999864
e32dc722eca5		0.000132	Proliferate_DR	Proliferate_DR	Proliferate_DR	1	0	0.000132
e39b627cf648		0.000155	Proliferate_DR	Moderate	Moderate	1	1	-0.999845
e3ab63dc9a60		0.000139	Proliferate_DR	Mild	Mild	1	1	-0.999861
e3ec668f6fad		0.000181	Proliferate_DR	Proliferate_DR	Proliferate_DR	1	0	0.000181
e4730ddde408		9.7e-05	Proliferate_DR	Moderate	Moderate	1	1	-0.999903
e4f12411fd85		0.000202	Proliferate_DR	Proliferate_DR	Severe	0	1	-0.999798
e62490b7d0e9		0.000201	Proliferate_DR	Proliferate_DR	Moderate	0	1	-0.999799
e740af6ac6ea		0.000212	Proliferate_DR	Moderate	Moderate	1	1	-0.999788
e7d2c2c3b30f		0.000187	Proliferate_DR	Moderate	Moderate	1	1	-0.999813
e821c1b6417a		0.000229	Proliferate_DR	Proliferate_DR	Mild	0	1	-0.999771
e9ab8413e771		0.000159	Proliferate_DR	No_DR	Severe	0	1	-0.999841
eaa0dfbd5024		0.000154	Proliferate_DR	Proliferate_DR	Moderate	0	1	-0.999846
eadc57064154		0.000317	Proliferate_DR	No_DR	No_DR	1	1	-0.999683
eb1d37b71fd1		0.000154	Proliferate_DR	Proliferate_DR	Proliferate_DR	1	0	0.000154
ebe0175e530c		0.000135	Proliferate_DR	Proliferate_DR	Proliferate_DR	1	0	0.000135
ed246ae1ed08		0.000113	Proliferate_DR	Proliferate_DR	Moderate	0	1	-0.999887
ed3a0fc5b546		0.000247	Proliferate_DR	Proliferate_DR	Mild	0	1	-0.999753
ee1ec90b980f		0.000147	Proliferate_DR	Mild	Severe	0	1	-0.999853
ef26625121b3		0.000171	Proliferate_DR	Proliferate_DR	Moderate	0	1	-0.999829
f0098e9d4aee		0.000197	Proliferate_DR	Proliferate_DR	Moderate	0	1	-0.999803
f025f33b2c9b		9.8e-05	Proliferate_DR	Proliferate_DR	Moderate	0	1	-0.999902
f03d3c4ce7fb		0.000148	Proliferate_DR	Moderate	Moderate	1	1	-0.999852
f0f89314e860		0.00014	Proliferate_DR	Severe	Severe	1	1	-0.99986
f1dc26c4bfa3		0.000128	Proliferate_DR	Proliferate_DR	Moderate	0	1	-0.999872
f2d2a0c92034		0.000107	Proliferate_DR	Proliferate_DR	Moderate	0	1	-0.999893
f549294e12e1		0.000247	Proliferate_DR	Proliferate_DR	Proliferate_DR	1	0	0.000247
f58d37d48e42		0.000179	Proliferate_DR	Proliferate_DR	Moderate	0	1	-0.999821
f5e6226bd2e0		0.00011	Proliferate_DR	Mild	Severe	0	1	-0.99989
f69835dc7c50		0.000141	Proliferate_DR	Moderate	Moderate	1	1	-0.999859
f6f3ea0d2693		0.00039	Proliferate_DR	Proliferate_DR	Proliferate_DR	1	0	0.00039
f72adcac5638		7.4e-05	Proliferate_DR	Proliferate_DR	Moderate	0	1	-0.999926
f850cb51fdba		0.000149	Proliferate_DR	Proliferate_DR	Mild	0	1	-0.999851
f8cf7ed8ef00		0.000183	Proliferate_DR	Proliferate_DR	Severe	0	1	-0.999817
fa59221cf464		0.000243	Proliferate_DR	Proliferate_DR	Severe	0	1	-0.999757
fb696a8e055a		0.000408	Proliferate_DR	Proliferate_DR	Proliferate_DR	1	0	0.000408
fce93caa4758		0.000213	Proliferate_DR	Proliferate_DR	Mild	0	1	-0.999787
fdd534271f3d		0.000134	Proliferate_DR	Moderate	Proliferate_DR	0	1	-0.999866
ff8a0b45c789		0.001023	Proliferate_DR	Proliferate_DR	Proliferate_DR	1	0	0.001023
						25	48	-47.9886

[truncated: 160 more sheets: Proliferate_1_alexnet_shufflene, Proliferate_1_alexnet_vgg16, Proliferate_1_alexnet_vgg19, Proliferate_1_alexnet_xception, Proliferate_1_densenet_alexnet, Proliferate_1_densenet_densenet, Proliferate_1_densenet_efficien, Proliferate_1_densenet_googlene, Proliferate_1_densenet_inceptio, Proliferate_densenet_incptionv3, Proliferate_1_densenet_mobilene, Proliferate_1_densenet_resnet18, Proliferate_1_densenet_resnet50, Proliferate_1_densenet_shufflen, Proliferate_1_densenet_vgg16, Proliferate_1_densenet_vgg19, Proliferate_1_densenet_xception, Proliferate_1_efficientnetb0_al, Proliferate_1_efficientnetb0_de, Proliferate_1_efficientnetb0_ef …]
