# Supplementary material for: Towards trustworthy digital health: reliability of uncertainty-aware convolutional neural networks
Source: PeerJ journal article supplement (doi:10.7717/peerj-cs.3414), 2026-01-28
Supplement: trustworthinessmain.zip [file Diabetic_Retinopathy_Severe.xlsx]

## Sheet: Severe_Alexnet_Alexnet
		Activation Maps Consensus		Network 1	Network 2
Immagine	Immagine	Gradcam-Consensus	True_Label	Alexnet_Scratch	Densenet_Scratch	Predict_Consensus	Penalty	Trustability
c5ba9e455d5e		1	Severe	Moderate	Moderate	1	1	0
c67117c6ab3b		1	Severe	Moderate	Moderate	1	1	0
c76664770c07		1	Severe	Moderate	Moderate	1	1	0
c9ea9d5eab65		1	Severe	Moderate	Moderate	1	1	0
ce207b69ff37		1	Severe	Moderate	Moderate	1	1	0
d0079cc188e9		1	Severe	Moderate	Moderate	1	1	0
d035c2bd9104		1	Severe	Severe	Severe	1	0	1
d0ffa0425ef1		1	Severe	Moderate	Moderate	1	1	0
d16398c971e9		1	Severe	Severe	Severe	1	0	1
d2ffe9287dc7		1	Severe	Moderate	Moderate	1	1	0
d3e884109b45		1	Severe	Severe	Severe	1	0	1
d868acdccb5b		1	Severe	Severe	Severe	1	0	1
dbb2c63f6f08		1	Severe	Moderate	Moderate	1	1	0
dbfd238b3468		1	Severe	Severe	Severe	1	0	1
dd3dad6ca78f		1	Severe	Severe	Severe	1	0	1
e0b5a982a018		1	Severe	Severe	Severe	1	0	1
e13412678eff		1	Severe	Severe	Severe	1	0	1
e1900014dabf		1	Severe	Mild	Mild	1	1	0
e19936582c61		1	Severe	Moderate	Moderate	1	1	0
e1fb532f55df		1	Severe	Severe	Severe	1	0	1
e32a359be36d		1	Severe	Severe	Severe	1	0	1
e4210e7fe587		1	Severe	Severe	Severe	1	0	1
e52ed5c29c5e		1	Severe	Moderate	Moderate	1	1	0
e76a9cbb2a8c		1	Severe	Severe	Severe	1	0	1
e8d1c6c07cf2		1	Severe	Moderate	Moderate	1	1	0
e93394175a19		1	Severe	Severe	Severe	1	0	1
ed6704e3b72e		1	Severe	Severe	Severe	1	0	1
f080a22008be		1	Severe	Severe	Severe	1	0	1
f092febbf5c0		1	Severe	Moderate	Moderate	1	1	0
f576e45d1da2		1	Severe	Moderate	Moderate	1	1	0
f5a8c6426a71		1	Severe	Moderate	Moderate	1	1	0
f64214bed40e		1	Severe	No_DR	No_DR	1	1	0
f6f433f3306f		1	Severe	Severe	Severe	1	0	1
f901d460517c		1	Severe	Proliferate_DR	Proliferate_DR	1	1	0
f9156aeffc5e		1	Severe	Severe	Severe	1	0	1
fb61230b99dd		1	Severe	Proliferate_DR	Proliferate_DR	1	1	0
fcc6aa6755e6		1	Severe	Proliferate_DR	Proliferate_DR	1	1	0
fda39982a810		1	Severe	Moderate	Moderate	1	1	0
fe0fc67c7980		1	Severe	Moderate	Moderate	1	1	0
						39	22	17

## Sheet: Severe_Alexnet_Densenet
		Activation Maps Consensus		Network 1	Network 2
Immagine	Immagine	Gradcam-Consensus	True_Label	Alexnet_Scratch	Densenet_Scratch	Predict_Consensus	Penalty	Trustability
c5ba9e455d5e		0.08963	Severe	Moderate	Moderate	1	1	-0.91037
c67117c6ab3b		0.541282	Severe	Moderate	Proliferate_DR	0	1	-0.458718
c76664770c07		0.229243	Severe	Moderate	Moderate	1	1	-0.770757
c9ea9d5eab65		0.471672	Severe	Moderate	Severe	0	1	-0.528328
ce207b69ff37		0.431877	Severe	Moderate	Moderate	1	1	-0.568123
d0079cc188e9		0.457837	Severe	Moderate	Moderate	1	1	-0.542163
d035c2bd9104		0.422233	Severe	Severe	Severe	1	0	0.422233
d0ffa0425ef1		0.331096	Severe	Moderate	Moderate	1	1	-0.668904
d16398c971e9		0.453604	Severe	Severe	Severe	1	0	0.453604
d2ffe9287dc7		0.659839	Severe	Moderate	Moderate	1	1	-0.340161
d3e884109b45		0.251729	Severe	Severe	No_DR	0	1	-0.748271
d868acdccb5b		0.693439	Severe	Severe	Mild	0	1	-0.306561
dbb2c63f6f08		0.427754	Severe	Moderate	Moderate	1	1	-0.572246
dbfd238b3468		0.255156	Severe	Severe	Proliferate_DR	0	1	-0.744844
dd3dad6ca78f		0.085941	Severe	Severe	Moderate	0	1	-0.914059
e0b5a982a018		0.349964	Severe	Severe	Proliferate_DR	0	1	-0.650036
e13412678eff		0.347548	Severe	Severe	Moderate	0	1	-0.652452
e1900014dabf		0.196095	Severe	Mild	Mild	1	1	-0.803905
e19936582c61		0.512771	Severe	Moderate	Moderate	1	1	-0.487229
e1fb532f55df		0.480987	Severe	Severe	Severe	1	0	0.480987
e32a359be36d		0.20217	Severe	Severe	Severe	1	0	0.20217
e4210e7fe587		0.152185	Severe	Severe	Moderate	0	1	-0.847815
e52ed5c29c5e		0.630623	Severe	Moderate	Moderate	1	1	-0.369377
e76a9cbb2a8c		0.413737	Severe	Severe	Proliferate_DR	0	1	-0.586263
e8d1c6c07cf2		0.574066	Severe	Moderate	Mild	0	1	-0.425934
e93394175a19		0.367584	Severe	Severe	Proliferate_DR	0	1	-0.632416
ed6704e3b72e		0.521167	Severe	Severe	Severe	1	0	0.521167
f080a22008be		0.447354	Severe	Severe	Severe	1	0	0.447354
f092febbf5c0		0.548085	Severe	Moderate	Mild	0	1	-0.451915
f576e45d1da2		0.479445	Severe	Moderate	Moderate	1	1	-0.520555
f5a8c6426a71		0.729115	Severe	Moderate	Mild	0	1	-0.270885
f64214bed40e		0.322443	Severe	No_DR	No_DR	1	1	-0.677557
f6f433f3306f		0.433145	Severe	Severe	Proliferate_DR	0	1	-0.566855
f901d460517c		0.462826	Severe	Proliferate_DR	Proliferate_DR	1	1	-0.537174
f9156aeffc5e		0.45175	Severe	Severe	Severe	1	0	0.45175
fb61230b99dd		0.502618	Severe	Proliferate_DR	Proliferate_DR	1	1	-0.497382
fcc6aa6755e6		0.374828	Severe	Proliferate_DR	Proliferate_DR	1	1	-0.625172
fda39982a810		0.274309	Severe	Moderate	Moderate	1	1	-0.725691
fe0fc67c7980		0.245534	Severe	Moderate	Moderate	1	1	-0.754466
						24	32	-16.1773

## Sheet: Severe_Alexnet_Efficientnetb0
		Activation Maps Consensus		Network 1	Network 2
Immagine	Immagine	Gradcam-Consensus	True_Label	Alexnet_Scratch	Densenet_Scratch	Predict_Consensus	Penalty	Trustability
c5ba9e455d5e		0.170081	Severe	Moderate	Moderate	1	1	-0.829919
c67117c6ab3b		0.500486	Severe	Moderate	Proliferate_DR	0	1	-0.499514
c76664770c07		0.075913	Severe	Moderate	Moderate	1	1	-0.924087
c9ea9d5eab65		0.432003	Severe	Moderate	Moderate	1	1	-0.567997
ce207b69ff37		0.557497	Severe	Moderate	Severe	0	1	-0.442503
d0079cc188e9		0.409445	Severe	Moderate	Moderate	1	1	-0.590555
d035c2bd9104		0.402961	Severe	Severe	Severe	1	0	0.402961
d0ffa0425ef1		0.519	Severe	Moderate	Severe	0	1	-0.481
d16398c971e9		0.444546	Severe	Severe	Moderate	0	1	-0.555454
d2ffe9287dc7		0.437765	Severe	Moderate	Severe	0	1	-0.562235
d3e884109b45		0.182948	Severe	Severe	Moderate	0	1	-0.817052
d868acdccb5b		0.640118	Severe	Severe	Moderate	0	1	-0.359882
dbb2c63f6f08		0.383035	Severe	Moderate	Severe	0	1	-0.616965
dbfd238b3468		0.101272	Severe	Severe	Severe	1	0	0.101272
dd3dad6ca78f		0.235934	Severe	Severe	Severe	1	0	0.235934
e0b5a982a018		0.281745	Severe	Severe	Proliferate_DR	0	1	-0.718255
e13412678eff		0.34387	Severe	Severe	Severe	1	0	0.34387
e1900014dabf		0.303635	Severe	Mild	Mild	1	1	-0.696365
e19936582c61		0.481435	Severe	Moderate	Moderate	1	1	-0.518565
e1fb532f55df		0.391075	Severe	Severe	Mild	0	1	-0.608925
e32a359be36d		0.356107	Severe	Severe	Severe	1	0	0.356107
e4210e7fe587		0.327169	Severe	Severe	Moderate	0	1	-0.672831
e52ed5c29c5e		0.397431	Severe	Moderate	Moderate	1	1	-0.602569
e76a9cbb2a8c		0.346207	Severe	Severe	Severe	1	0	0.346207
e8d1c6c07cf2		0.47962	Severe	Moderate	Moderate	1	1	-0.52038
e93394175a19		0.600727	Severe	Severe	Severe	1	0	0.600727
ed6704e3b72e		0.72645	Severe	Severe	Moderate	0	1	-0.27355
f080a22008be		0.494275	Severe	Severe	Moderate	0	1	-0.505725
f092febbf5c0		0.463222	Severe	Moderate	Moderate	1	1	-0.536778
f576e45d1da2		0.370911	Severe	Moderate	Moderate	1	1	-0.629089
f5a8c6426a71		0.567126	Severe	Moderate	Moderate	1	1	-0.432874
f64214bed40e		0.15935	Severe	No_DR	Severe	0	1	-0.84065
f6f433f3306f		0.321005	Severe	Severe	Severe	1	0	0.321005
f901d460517c		0.531629	Severe	Proliferate_DR	Severe	0	1	-0.468371
f9156aeffc5e		0.433803	Severe	Severe	Proliferate_DR	0	1	-0.566197
fb61230b99dd		0.298697	Severe	Proliferate_DR	Severe	0	1	-0.701303
fcc6aa6755e6		0.652906	Severe	Proliferate_DR	Proliferate_DR	1	1	-0.347094
fda39982a810		0.267311	Severe	Moderate	Moderate	1	1	-0.732689
fe0fc67c7980		0.233507	Severe	Moderate	Moderate	1	1	-0.766493
						22	31	-15.6778

## Sheet: Severe_Alexnet_googlenet
		Activation Maps Consensus		Network 1	Network 2
Immagine	Immagine	Gradcam-Consensus	True_Label	Alexnet_Scratch	Densenet_Scratch	Predict_Consensus	Penalty	Trustability
c5ba9e455d5e		0.190521	Severe	Moderate	Mild	0	1	-0.809479
c67117c6ab3b		0.566254	Severe	Moderate	Mild	0	1	-0.433746
c76664770c07		0.477079	Severe	Moderate	Moderate	1	1	-0.522921
c9ea9d5eab65		0.291811	Severe	Moderate	Moderate	1	1	-0.708189
ce207b69ff37		0.505395	Severe	Moderate	Moderate	1	1	-0.494605
d0079cc188e9		0.575253	Severe	Moderate	Moderate	1	1	-0.424747
d035c2bd9104		0.601175	Severe	Severe	Proliferate_DR	0	1	-0.398825
d0ffa0425ef1		0.32037	Severe	Moderate	Severe	0	1	-0.67963
d16398c971e9		0.482155	Severe	Severe	Severe	1	0	0.482155
d2ffe9287dc7		0.514323	Severe	Moderate	Moderate	1	1	-0.485677
d3e884109b45		0.543364	Severe	Severe	Moderate	0	1	-0.456636
d868acdccb5b		0.522892	Severe	Severe	Mild	0	1	-0.477108
dbb2c63f6f08		0.552622	Severe	Moderate	Moderate	1	1	-0.447378
dbfd238b3468		0.303071	Severe	Severe	Severe	1	0	0.303071
dd3dad6ca78f		0.228485	Severe	Severe	Proliferate_DR	0	1	-0.771515
e0b5a982a018		0.257151	Severe	Severe	Mild	0	1	-0.742849
e13412678eff		0.328987	Severe	Severe	Moderate	0	1	-0.671013
e1900014dabf		0.682643	Severe	Mild	Mild	1	1	-0.317357
e19936582c61		0.515659	Severe	Moderate	Moderate	1	1	-0.484341
e1fb532f55df		0.214405	Severe	Severe	Severe	1	0	0.214405
e32a359be36d		0	Severe	Severe	Severe	1	0	0
e4210e7fe587		0.369916	Severe	Severe	Moderate	0	1	-0.630084
e52ed5c29c5e		0.525466	Severe	Moderate	Moderate	1	1	-0.474534
e76a9cbb2a8c		0.176469	Severe	Severe	Proliferate_DR	0	1	-0.823531
e8d1c6c07cf2		0.46247	Severe	Moderate	Moderate	1	1	-0.53753
e93394175a19		0.398333	Severe	Severe	Moderate	0	1	-0.601667
ed6704e3b72e		0.542304	Severe	Severe	Severe	1	0	0.542304
f080a22008be		0.441937	Severe	Severe	Severe	1	0	0.441937
f092febbf5c0		0.6206	Severe	Moderate	Mild	0	1	-0.3794
f576e45d1da2		0.489115	Severe	Moderate	Moderate	1	1	-0.510885
f5a8c6426a71		0.515241	Severe	Moderate	Moderate	1	1	-0.484759
f64214bed40e		0.161637	Severe	No_DR	Moderate	0	1	-0.838363
f6f433f3306f		0	Severe	Severe	Severe	1	0	0
f901d460517c		0.076934	Severe	Proliferate_DR	Proliferate_DR	1	1	-0.923066
f9156aeffc5e		0.266897	Severe	Severe	Severe	1	0	0.266897
fb61230b99dd		0.264724	Severe	Proliferate_DR	Mild	0	1	-0.735276
fcc6aa6755e6		0.3098	Severe	Proliferate_DR	Severe	0	1	-0.6902
fda39982a810		0.424745	Severe	Moderate	Moderate	1	1	-0.575255
fe0fc67c7980		0.233412	Severe	Moderate	Moderate	1	1	-0.766588
						23	31	-16.0464

## Sheet: Severe_Alexnet_Inceptionresnetv
		Activation Maps Consensus		Network 1	Network 2
Immagine	Immagine	Gradcam-Consensus	True_Label	Alexnet_Scratch	Densenet_Scratch	Predict_Consensus	Penalty	Trustability
c5ba9e455d5e		0.000194	Severe	Moderate	Moderate	1	1	-0.999806
c67117c6ab3b		0.000118	Severe	Moderate	Severe	0	1	-0.999882
c76664770c07		7.2e-05	Severe	Moderate	Severe	0	1	-0.999928
c9ea9d5eab65		0.000145	Severe	Moderate	Mild	0	1	-0.999855
ce207b69ff37		0.000146	Severe	Moderate	Moderate	1	1	-0.999854
d0079cc188e9		0.000116	Severe	Moderate	Moderate	1	1	-0.999884
d035c2bd9104		0.000117	Severe	Severe	No_DR	0	1	-0.999883
d0ffa0425ef1		0.000239	Severe	Moderate	Moderate	1	1	-0.999761
d16398c971e9		0.000201	Severe	Severe	Moderate	0	1	-0.999799
d2ffe9287dc7		0.000128	Severe	Moderate	Moderate	1	1	-0.999872
d3e884109b45		9.7e-05	Severe	Severe	No_DR	0	1	-0.999903
d868acdccb5b		0.000113	Severe	Severe	Severe	1	0	0.000113
dbb2c63f6f08		9.5e-05	Severe	Moderate	Moderate	1	1	-0.999905
dbfd238b3468		0.000103	Severe	Severe	Severe	1	0	0.000103
dd3dad6ca78f		0.000174	Severe	Severe	Moderate	0	1	-0.999826
e0b5a982a018		0.000212	Severe	Severe	Proliferate_DR	0	1	-0.999788
e13412678eff		0.000172	Severe	Severe	Severe	1	0	0.000172
e1900014dabf		6.9e-05	Severe	Mild	Moderate	0	1	-0.999931
e19936582c61		0.000136	Severe	Moderate	Moderate	1	1	-0.999864
e1fb532f55df		0.000223	Severe	Severe	Severe	1	0	0.000223
e32a359be36d		0.000111	Severe	Severe	Moderate	0	1	-0.999889
e4210e7fe587		0.000117	Severe	Severe	No_DR	0	1	-0.999883
e52ed5c29c5e		0.000109	Severe	Moderate	Moderate	1	1	-0.999891
e76a9cbb2a8c		0.000213	Severe	Severe	Proliferate_DR	0	1	-0.999787
e8d1c6c07cf2		0.000159	Severe	Moderate	Moderate	1	1	-0.999841
e93394175a19		0.000135	Severe	Severe	Moderate	0	1	-0.999865
ed6704e3b72e		0.000174	Severe	Severe	Proliferate_DR	0	1	-0.999826
f080a22008be		0.000175	Severe	Severe	Severe	1	0	0.000175
f092febbf5c0		7.8e-05	Severe	Moderate	Mild	0	1	-0.999922
f576e45d1da2		0.00014	Severe	Moderate	Moderate	1	1	-0.99986
f5a8c6426a71		8.5e-05	Severe	Moderate	Severe	0	1	-0.999915
f64214bed40e		0.000102	Severe	No_DR	No_DR	1	1	-0.999898
f6f433f3306f		0.000104	Severe	Severe	Moderate	0	1	-0.999896
f901d460517c		0.000176	Severe	Proliferate_DR	Moderate	0	1	-0.999824
f9156aeffc5e		0.000222	Severe	Severe	Severe	1	0	0.000222
fb61230b99dd		0.000521	Severe	Proliferate_DR	Moderate	0	1	-0.999479
fcc6aa6755e6		0.000276	Severe	Proliferate_DR	Proliferate_DR	1	1	-0.999724
fda39982a810		0.0002	Severe	Moderate	Moderate	1	1	-0.9998
fe0fc67c7980		0.000259	Severe	Moderate	Moderate	1	1	-0.999741
						20	33	-32.9938

## Sheet: Severe_Alexnet_Inceptionv3
		Activation Maps Consensus		Network 1	Network 2
Immagine	Immagine	Gradcam-Consensus	True_Label	Alexnet_Scratch	Densenet_Scratch	Predict_Consensus	Penalty	Trustability
c5ba9e455d5e		0.26877	Severe	Moderate	Moderate	1	1	-0.73123
c67117c6ab3b		0.536086	Severe	Moderate	Severe	0	1	-0.463914
c76664770c07		0.074275	Severe	Moderate	Severe	0	1	-0.925725
c9ea9d5eab65		0.16879	Severe	Moderate	Moderate	1	1	-0.83121
ce207b69ff37		0.589795	Severe	Moderate	Moderate	1	1	-0.410205
d0079cc188e9		0.546049	Severe	Moderate	Moderate	1	1	-0.453951
d035c2bd9104		0.429634	Severe	Severe	Moderate	0	1	-0.570366
d0ffa0425ef1		0.523707	Severe	Moderate	Severe	0	1	-0.476293
d16398c971e9		0.612381	Severe	Severe	Moderate	0	1	-0.387619
d2ffe9287dc7		0.521639	Severe	Moderate	Moderate	1	1	-0.478361
d3e884109b45		0.329803	Severe	Severe	Severe	1	0	0.329803
d868acdccb5b		0.539703	Severe	Severe	Moderate	0	1	-0.460297
dbb2c63f6f08		0.419388	Severe	Moderate	Moderate	1	1	-0.580612
dbfd238b3468		0.32444	Severe	Severe	Proliferate_DR	0	1	-0.67556
dd3dad6ca78f		0.085289	Severe	Severe	Mild	0	1	-0.914711
e0b5a982a018		0.392217	Severe	Severe	Proliferate_DR	0	1	-0.607783
e13412678eff		0.309617	Severe	Severe	Moderate	0	1	-0.690383
e1900014dabf		0.305426	Severe	Mild	Mild	1	1	-0.694574
e19936582c61		0.50799	Severe	Moderate	Moderate	1	1	-0.49201
e1fb532f55df		0.293715	Severe	Severe	Severe	1	0	0.293715
e32a359be36d		0.11502	Severe	Severe	Severe	1	0	0.11502
e4210e7fe587		0.35465	Severe	Severe	Severe	1	0	0.35465
e52ed5c29c5e		0.403137	Severe	Moderate	Moderate	1	1	-0.596863
e76a9cbb2a8c		0.358646	Severe	Severe	Severe	1	0	0.358646
e8d1c6c07cf2		0.49691	Severe	Moderate	Moderate	1	1	-0.50309
e93394175a19		0.515454	Severe	Severe	Moderate	0	1	-0.484546
ed6704e3b72e		0.539228	Severe	Severe	Severe	1	0	0.539228
f080a22008be		0.517072	Severe	Severe	Severe	1	0	0.517072
f092febbf5c0		0.490573	Severe	Moderate	Severe	0	1	-0.509427
f576e45d1da2		0.342199	Severe	Moderate	Moderate	1	1	-0.657801
f5a8c6426a71		0.58043	Severe	Moderate	Mild	0	1	-0.41957
f64214bed40e		0.021406	Severe	No_DR	No_DR	1	1	-0.978594
f6f433f3306f		0.41744	Severe	Severe	Severe	1	0	0.41744
f901d460517c		0.402085	Severe	Proliferate_DR	Moderate	0	1	-0.597915
f9156aeffc5e		0.293373	Severe	Severe	Severe	1	0	0.293373
fb61230b99dd		0.488551	Severe	Proliferate_DR	Proliferate_DR	1	1	-0.511449
fcc6aa6755e6		0.453055	Severe	Proliferate_DR	Proliferate_DR	1	1	-0.546945
fda39982a810		0.343704	Severe	Moderate	Moderate	1	1	-0.656296
fe0fc67c7980		0.372883	Severe	Moderate	Moderate	1	1	-0.627117
						25	30	-14.7155

## Sheet: Severe_Alexnet_Mobilenetv2
		Activation Maps Consensus		Network 1	Network 2
Immagine	Immagine	Gradcam-Consensus	True_Label	Alexnet_Scratch	Densenet_Scratch	Predict_Consensus	Penalty	Trustability
c5ba9e455d5e		0.31168	Severe	Moderate	Moderate	1	1	-0.68832
c67117c6ab3b		0.58611	Severe	Moderate	Moderate	1	1	-0.41389
c76664770c07		0.333659	Severe	Moderate	Moderate	1	1	-0.666341
c9ea9d5eab65		0.323193	Severe	Moderate	Severe	0	1	-0.676807
ce207b69ff37		0.394848	Severe	Moderate	Moderate	1	1	-0.605152
d0079cc188e9		0.496268	Severe	Moderate	Moderate	1	1	-0.503732
d035c2bd9104		0.465198	Severe	Severe	No_DR	0	1	-0.534802
d0ffa0425ef1		0.574744	Severe	Moderate	Moderate	1	1	-0.425256
d16398c971e9		0.501032	Severe	Severe	Moderate	0	1	-0.498968
d2ffe9287dc7		0.428805	Severe	Moderate	Moderate	1	1	-0.571195
d3e884109b45		0.465423	Severe	Severe	Severe	1	0	0.465423
d868acdccb5b		0.678754	Severe	Severe	Mild	0	1	-0.321246
dbb2c63f6f08		0.41584	Severe	Moderate	Proliferate_DR	0	1	-0.58416
dbfd238b3468		0.288202	Severe	Severe	Moderate	0	1	-0.711798
dd3dad6ca78f		0.205132	Severe	Severe	Severe	1	0	0.205132
e0b5a982a018		0.462416	Severe	Severe	Moderate	0	1	-0.537584
e13412678eff		0.403943	Severe	Severe	Mild	0	1	-0.596057
e1900014dabf		0.246137	Severe	Mild	Mild	1	1	-0.753863
e19936582c61		0.549466	Severe	Moderate	Moderate	1	1	-0.450534
e1fb532f55df		0.275372	Severe	Severe	Severe	1	0	0.275372
e32a359be36d		0.306078	Severe	Severe	Moderate	0	1	-0.693922
e4210e7fe587		0.414096	Severe	Severe	Proliferate_DR	0	1	-0.585904
e52ed5c29c5e		0.491403	Severe	Moderate	Moderate	1	1	-0.508597
e76a9cbb2a8c		0.314157	Severe	Severe	Proliferate_DR	0	1	-0.685843
e8d1c6c07cf2		0.438469	Severe	Moderate	Moderate	1	1	-0.561531
e93394175a19		0.517722	Severe	Severe	Moderate	0	1	-0.482278
ed6704e3b72e		0.672273	Severe	Severe	Mild	0	1	-0.327727
f080a22008be		0.509263	Severe	Severe	Moderate	0	1	-0.490737
f092febbf5c0		0.553622	Severe	Moderate	Moderate	1	1	-0.446378
f576e45d1da2		0.393412	Severe	Moderate	Proliferate_DR	0	1	-0.606588
f5a8c6426a71		0.560859	Severe	Moderate	Moderate	1	1	-0.439141
f64214bed40e		0.33314	Severe	No_DR	No_DR	1	1	-0.66686
f6f433f3306f		0.404938	Severe	Severe	Proliferate_DR	0	1	-0.595062
f901d460517c		0.551415	Severe	Proliferate_DR	Moderate	0	1	-0.448585
f9156aeffc5e		0.335608	Severe	Severe	Mild	0	1	-0.664392
fb61230b99dd		0.437658	Severe	Proliferate_DR	Proliferate_DR	1	1	-0.562342
fcc6aa6755e6		0.583206	Severe	Proliferate_DR	Proliferate_DR	1	1	-0.416794
fda39982a810		0.166044	Severe	Moderate	Moderate	1	1	-0.833956
fe0fc67c7980		0.236487	Severe	Moderate	Moderate	1	1	-0.763513
						21	36	-19.3739

## Sheet: Severe_Alexnet_resnet18
		Activation Maps Consensus		Network 1	Network 2
Immagine	Immagine	Gradcam-Consensus	True_Label	Alexnet_Scratch	Densenet_Scratch	Predict_Consensus	Penalty	Trustability
c5ba9e455d5e		0.259465	Severe	Moderate	No_DR	0	1	-0.740535
c67117c6ab3b		0.449913	Severe	Moderate	Proliferate_DR	0	1	-0.550087
c76664770c07		0.142152	Severe	Moderate	Proliferate_DR	0	1	-0.857848
c9ea9d5eab65		0.382037	Severe	Moderate	Severe	0	1	-0.617963
ce207b69ff37		0.422871	Severe	Moderate	Moderate	1	1	-0.577129
d0079cc188e9		0.380666	Severe	Moderate	Moderate	1	1	-0.619334
d035c2bd9104		0.374315	Severe	Severe	No_DR	0	1	-0.625685
d0ffa0425ef1		0.540626	Severe	Moderate	Moderate	1	1	-0.459374
d16398c971e9		0.412076	Severe	Severe	Moderate	0	1	-0.587924
d2ffe9287dc7		0.498191	Severe	Moderate	Moderate	1	1	-0.501809
d3e884109b45		0.2391	Severe	Severe	No_DR	0	1	-0.7609
d868acdccb5b		0.671747	Severe	Severe	Mild	0	1	-0.328253
dbb2c63f6f08		0.448307	Severe	Moderate	Moderate	1	1	-0.551693
dbfd238b3468		0.260133	Severe	Severe	Severe	1	0	0.260133
dd3dad6ca78f		0.218128	Severe	Severe	Proliferate_DR	0	1	-0.781872
e0b5a982a018		0.247675	Severe	Severe	Severe	1	0	0.247675
e13412678eff		0.266665	Severe	Severe	Moderate	0	1	-0.733335
e1900014dabf		0.247012	Severe	Mild	Severe	0	1	-0.752988
e19936582c61		0.530303	Severe	Moderate	Moderate	1	1	-0.469697
e1fb532f55df		0.371711	Severe	Severe	Severe	1	0	0.371711
e32a359be36d		0.387609	Severe	Severe	No_DR	0	1	-0.612391
e4210e7fe587		0.122703	Severe	Severe	Severe	1	0	0.122703
e52ed5c29c5e		0.427569	Severe	Moderate	Moderate	1	1	-0.572431
e76a9cbb2a8c		0.358977	Severe	Severe	Proliferate_DR	0	1	-0.641023
e8d1c6c07cf2		0.492696	Severe	Moderate	Moderate	1	1	-0.507304
e93394175a19		0.421863	Severe	Severe	Proliferate_DR	0	1	-0.578137
ed6704e3b72e		0.507031	Severe	Severe	Moderate	0	1	-0.492969
f080a22008be		0.436642	Severe	Severe	Severe	1	0	0.436642
f092febbf5c0		0.420342	Severe	Moderate	Severe	0	1	-0.579658
f576e45d1da2		0.435534	Severe	Moderate	Moderate	1	1	-0.564466
f5a8c6426a71		0.500077	Severe	Moderate	Severe	0	1	-0.499923
f64214bed40e		0.264234	Severe	No_DR	No_DR	1	1	-0.735766
f6f433f3306f		0.436682	Severe	Severe	Severe	1	0	0.436682
f901d460517c		0.48497	Severe	Proliferate_DR	Moderate	0	1	-0.51503
f9156aeffc5e		0.285246	Severe	Severe	Severe	1	0	0.285246
fb61230b99dd		0.52643	Severe	Proliferate_DR	Moderate	0	1	-0.47357
fcc6aa6755e6		0.373438	Severe	Proliferate_DR	Proliferate_DR	1	1	-0.626562
fda39982a810		0.310305	Severe	Moderate	Moderate	1	1	-0.689695
fe0fc67c7980		0.374276	Severe	Moderate	Moderate	1	1	-0.625724
						20	32	-17.0703

## Sheet: Severe_Alexnet_resnet50
		Activation Maps Consensus		Network 1	Network 2
Immagine	Immagine	Gradcam-Consensus	True_Label	Alexnet_Scratch	Densenet_Scratch	Predict_Consensus	Penalty	Trustability
c5ba9e455d5e		0.000194	Severe	Moderate	Proliferate_DR	0	1	-0.999806
c67117c6ab3b		0.000118	Severe	Moderate	Severe	0	1	-0.999882
c76664770c07		7.2e-05	Severe	Moderate	Severe	0	1	-0.999928
c9ea9d5eab65		0.000145	Severe	Moderate	Moderate	1	1	-0.999855
ce207b69ff37		0.000146	Severe	Moderate	Moderate	1	1	-0.999854
d0079cc188e9		0.000116	Severe	Moderate	Moderate	1	1	-0.999884
d035c2bd9104		0.000117	Severe	Severe	Severe	1	0	0.000117
d0ffa0425ef1		0.000239	Severe	Moderate	Moderate	1	1	-0.999761
d16398c971e9		0.000201	Severe	Severe	Moderate	0	1	-0.999799
d2ffe9287dc7		0.000128	Severe	Moderate	Moderate	1	1	-0.999872
d3e884109b45		9.7e-05	Severe	Severe	Moderate	0	1	-0.999903
d868acdccb5b		0.000113	Severe	Severe	Mild	0	1	-0.999887
dbb2c63f6f08		9.5e-05	Severe	Moderate	Proliferate_DR	0	1	-0.999905
dbfd238b3468		0.000103	Severe	Severe	Moderate	0	1	-0.999897
dd3dad6ca78f		0.000174	Severe	Severe	Moderate	0	1	-0.999826
e0b5a982a018		0.000212	Severe	Severe	Moderate	0	1	-0.999788
e13412678eff		0.000172	Severe	Severe	Moderate	0	1	-0.999828
e1900014dabf		6.9e-05	Severe	Mild	Moderate	0	1	-0.999931
e19936582c61		0.000136	Severe	Moderate	Proliferate_DR	0	1	-0.999864
e1fb532f55df		0.000223	Severe	Severe	Severe	1	0	0.000223
e32a359be36d		0.000111	Severe	Severe	Moderate	0	1	-0.999889
e4210e7fe587		0.000117	Severe	Severe	No_DR	0	1	-0.999883
e52ed5c29c5e		0.000109	Severe	Moderate	Moderate	1	1	-0.999891
e76a9cbb2a8c		0.000213	Severe	Severe	Proliferate_DR	0	1	-0.999787
e8d1c6c07cf2		0.000159	Severe	Moderate	Moderate	1	1	-0.999841
e93394175a19		0.000135	Severe	Severe	Proliferate_DR	0	1	-0.999865
ed6704e3b72e		0.000174	Severe	Severe	Severe	1	0	0.000174
f080a22008be		0.000175	Severe	Severe	Proliferate_DR	0	1	-0.999825
f092febbf5c0		7.8e-05	Severe	Moderate	Mild	0	1	-0.999922
f576e45d1da2		0.00014	Severe	Moderate	Moderate	1	1	-0.99986
f5a8c6426a71		8.5e-05	Severe	Moderate	Mild	0	1	-0.999915
f64214bed40e		0.000102	Severe	No_DR	No_DR	1	1	-0.999898
f6f433f3306f		0.000104	Severe	Severe	Severe	1	0	0.000104
f901d460517c		0.000176	Severe	Proliferate_DR	Proliferate_DR	1	1	-0.999824
f9156aeffc5e		0.000222	Severe	Severe	Moderate	0	1	-0.999778
fb61230b99dd		0.000521	Severe	Proliferate_DR	Moderate	0	1	-0.999479
fcc6aa6755e6		0.000276	Severe	Proliferate_DR	Proliferate_DR	1	1	-0.999724
fda39982a810		0.0002	Severe	Moderate	Moderate	1	1	-0.9998
fe0fc67c7980		0.000259	Severe	Moderate	Moderate	1	1	-0.999741
						17	35	-34.9938

## Sheet: Severe_Alexnet_shufflenet
		Activation Maps Consensus		Network 1	Network 2
Immagine	Immagine	Gradcam-Consensus	True_Label	Alexnet_Scratch	Densenet_Scratch	Predict_Consensus	Penalty	Trustability
c5ba9e455d5e		0.30606	Severe	Moderate	Moderate	1	1	-0.69394
c67117c6ab3b		0.491745	Severe	Moderate	Severe	0	1	-0.508255
c76664770c07		0.083881	Severe	Moderate	No_DR	0	1	-0.916119
c9ea9d5eab65		0.372095	Severe	Moderate	Moderate	1	1	-0.627905
ce207b69ff37		0.34917	Severe	Moderate	Moderate	1	1	-0.65083
d0079cc188e9		0.432065	Severe	Moderate	Moderate	1	1	-0.567935
d035c2bd9104		0.482455	Severe	Severe	Moderate	0	1	-0.517545
d0ffa0425ef1		0.475488	Severe	Moderate	Moderate	1	1	-0.524512
d16398c971e9		0.539363	Severe	Severe	Moderate	0	1	-0.460637
d2ffe9287dc7		0.571173	Severe	Moderate	Moderate	1	1	-0.428827
d3e884109b45		0.229838	Severe	Severe	No_DR	0	1	-0.770162
d868acdccb5b		0.694615	Severe	Severe	Moderate	0	1	-0.305385
dbb2c63f6f08		0.433739	Severe	Moderate	Proliferate_DR	0	1	-0.566261
dbfd238b3468		0.180559	Severe	Severe	Severe	1	0	0.180559
dd3dad6ca78f		0.298583	Severe	Severe	Proliferate_DR	0	1	-0.701417
e0b5a982a018		0.335195	Severe	Severe	Mild	0	1	-0.664805
e13412678eff		0.290025	Severe	Severe	Mild	0	1	-0.709975
e1900014dabf		0.37204	Severe	Mild	Mild	1	1	-0.62796
e19936582c61		0.59634	Severe	Moderate	Moderate	1	1	-0.40366
e1fb532f55df		0.339284	Severe	Severe	Severe	1	0	0.339284
e32a359be36d		0.232174	Severe	Severe	Moderate	0	1	-0.767826
e4210e7fe587		0.446958	Severe	Severe	Moderate	0	1	-0.553042
e52ed5c29c5e		0.442141	Severe	Moderate	Moderate	1	1	-0.557859
e76a9cbb2a8c		0.405015	Severe	Severe	Severe	1	0	0.405015
e8d1c6c07cf2		0.659116	Severe	Moderate	Moderate	1	1	-0.340884
e93394175a19		0.599186	Severe	Severe	Moderate	0	1	-0.400814
ed6704e3b72e		0.501748	Severe	Severe	Mild	0	1	-0.498252
f080a22008be		0.507695	Severe	Severe	Moderate	0	1	-0.492305
f092febbf5c0		0.486326	Severe	Moderate	Moderate	1	1	-0.513674
f576e45d1da2		0.436837	Severe	Moderate	Moderate	1	1	-0.563163
f5a8c6426a71		0.536007	Severe	Moderate	Moderate	1	1	-0.463993
f64214bed40e		0.307151	Severe	No_DR	No_DR	1	1	-0.692849
f6f433f3306f		0.412902	Severe	Severe	Moderate	0	1	-0.587098
f901d460517c		0.650303	Severe	Proliferate_DR	Moderate	0	1	-0.349697
f9156aeffc5e		0.460717	Severe	Severe	Severe	1	0	0.460717
fb61230b99dd		0.448376	Severe	Proliferate_DR	Proliferate_DR	1	1	-0.551624
fcc6aa6755e6		0.482721	Severe	Proliferate_DR	Severe	0	1	-0.517279
fda39982a810		0.247774	Severe	Moderate	Moderate	1	1	-0.752226
fe0fc67c7980		0.243298	Severe	Moderate	Moderate	1	1	-0.756702
						21	35	-18.6198

[truncated: 160 more sheets: Severe_Alexnet_vgg16, Severe_Alexnet_vgg19, Severe_Alexnet_xception, Severe_densenet_alexnet, Severe_densenet_densenet, Severe_densenet_efficientnetb0, Severe_densenet_googlenet, Severe_densenet_inceptionresnet, Severe_densenet_inceptionv3, Severe_densenet_mobilenetv2, Severe_densenet_resnet18, Severe_densenet_resnet50, Severe_densenet_shufflenet, Severe_densenet_vgg16, Severe_densenet_vgg19, Severe_densenet_xception, Severe_efficientnetb0_alexnet, Severe_efficientnetb0_densenet, Severe_efficientnetb0_efficient, Severe_efficientnetb0_googlenet …]
