# Supplementary material for: Towards trustworthy digital health: reliability of uncertainty-aware convolutional neural networks
Source: PeerJ journal article supplement (doi:10.7717/peerj-cs.3414), 2026-01-28
Supplement: trustworthinessmain.zip [file performance.xlsx]

## Sheet: retinopatia
		Accuracy (%)	SN micro (%)	SP macro (%)	PRE micro (%)	F1 micro (%)	SN macro (%)	PRE macro (%)	F1 macro (%)	Halo (%)	FPR macro (%)	FNR macro (%)
	Alexnet	84.8568	84.8568	95.597	84.8568	84.8568	70.5588	79.4579	73.8531	0.1514	4.40303	29.44
	Densenet	75.1705	75.1705	93.4237	75.1705	75.1705	53.2363	54.9965	53.9673	0.2483	6.57634	46.7637
	Efficientnet	81.5825	81.5825	95.0892	81.5825	81.5825	63.6586	70.152	65.9915	0.1842	4.91076	36.3414
	Googlenet	76.2619	76.2619	93.2511	76.2619	76.2619	53.498	63.6625	54.4445	0.2374	6.74894	46.502
	Inceptionresnetv2	78.854	78.854	94.0018	78.854	78.854	56.919	67.373	57.9165	0.2115	5.9982	43.081
	Inceptionv3	79.1269	79.1269	94.3265	79.1269	79.1269	60.2226	65.0292	61.9924	0.2087	5.67349	39.7774
	mobilenetv2	70.8049	70.8049	92.2754	70.8049	70.8049	45.5197	46.4406	45.7361	0.292	7.72465	54.4803
	Resnet18	76.9441	76.9441	93.4505	76.9441	76.9441	55.1922	61.6934	57.0755	0.2306	6.54954	44.8078
	Resnet50	75.4434	75.4434	93.4617	75.4434	75.4434	51.9025	54.0198	52.4034	0.2456	6.53826	48.0975
	Shufflenet	74.6248	74.6248	92.7582	74.6248	74.6248	47.6315	57.1498	47.8681	0.2538	7.2418	52.3685
	VGG16	86.6303	86.6303	96.3576	86.6303	86.6303	71.5921	80.3514	74.6272	0.1337	3.6424	28.4079
	VGG19	93.1787	93.1787	98.1256	93.1787	93.1787	87.1022	90.6517	88.7458	0.0682	1.87445	12.8978
	Xception	72.442	72.442	92.3956	72.442	72.442	49.3086	51.6036	50.1413	0.2756	7.60436	50.6914

## Sheet: melanoma
										Accuracy	Precision:	Recall (Sensitivity)	Specificity	F1-Score	False Positive Rate (FPR):	False Negative Rate (FNR):
									Alexnet	0.802	0.7518	0.955	0.6154	0.8413	0.3846	0.045
									Densenet	0.802	0.7518	0.955	0.6154	0.8413	0.3846	0.045
									Efficientnet	0.8119	0.7829	0.9099	0.6923	0.8417	0.3077	0.0901
									Googlenet	0.8218	0.8261	0.8559	0.7802	0.8407	0.2198	0.1441
									Inceptionresnetv2	0.8119	0.7786	0.9189	0.6813	0.843	0.3187	0.0811
									Inceptionv3	0.7772	0.7324	0.9369	0.5824	0.8221	0.4176	0.0631
									mobilenetv2	0.7871	0.7656	0.8829	0.6703	0.8201	0.3297	0.1171
									Resnet18	0.802	0.7669	0.9189	0.6593	0.8361	0.3407	0.0811
									Resnet50	0.8119	0.7626	0.955	0.6374	0.848	0.3626	0.045
									Shufflenet	0.802	0.763	0.9279	0.6484	0.8374	0.3516	0.0721
									VGG16	0.8069	0.8	0.8649	0.7363	0.8312	0.2637	0.1351
									VGG19	0.7881	0.8378	0.8378	0.7253	0.8122	0.2747	0.1622
									Xception	0.7733	0.7609	0.9459	0.459	0.8434	0.541	0.0541
